# Supplementary material for: Dual Inhibitors of AChE and BACE-1 for Reducing Aβ in Alzheimer’s Disease: From In Silico to In Vivo
Source: Int J Mol Sci. 2022 Oct 28;23(21):13098. doi: 10.3390/ijms232113098 (PMC9655245; doi:10.3390/ijms232113098)
Supplement: Supplementary file 1 [file ijms-23-13098-s001.zip › ijms-1891300-supplementary.xlsx]

## Sheet: S1E
Table S1E: AChE active molecules lists
SMILES	NAME	IC50	Model 1 (AvI)		SMILES	NAME	IC50	Model 4 (HvL)		SMILES	NAME	IC50	Model 5 (HvL)		comment:
Clc1cc2[nH+]c3c(CCCC3)c(NCCCCCCC(=O)NCCc3c4c([nH]c3)cccc4)c2cc1	CHEMBL381499	0.1			[nH+]1c2c(CCCC2)c(NCCC[NH+](CCCNc2c3CCCCc3[nH+]c3c2cccc3)C)c2c1cccc2	CHEMBL338755	0.3			[nH+]1c2c(CCCC2)c(NCCC[NH+](CCCNc2c3CCCCc3[nH+]c3c2cccc3)C)c2c1cccc2	CHEMBL338755	0.3			In AvI model - the list includes only the actives. The inactives are randoms.
Clc1cc2[nH+]c3c(CCCC3)c(NCCCCCCCCCCNC(=O)C=3Oc4c(cc(OC)cc4)C(=O)C=3)c2cc1	CHEMBL2019035	0.1			Clc1cc2[nH+]c3c(CCCC3)c(NCCCCCCCCCCNC(=O)C=3Oc4c(cccc4)C(=O)C=3)c2cc1	CHEMBL2019032	0.3			Clc1cc2[nH+]c3c(CCCC3)c(NCCCCCCCCCCNC(=O)C=3Oc4c(cccc4)C(=O)C=3)c2cc1	CHEMBL2019032	0.3			In HvL model- the list includes highly active molecules as "actives" and low-activity molecules as "inactives".
Clc1cc2[nH+]c3c(CCCC3)c(NCCCCCCCCCCNC(=O)C=3Oc4c(cc(OC)c(OC)c4)C(=O)C=3)c2cc1	CHEMBL2019041	0.2			Clc1cc2[nH+]c3c(CCCC3)c(NCCCCCCCCCCNC(=O)C=3Oc4c(C(=O)C=3)c(OC)cc(OC)c4)c2cc1	CHEMBL2019038	0.35			Clc1cc2[nH+]c3c(CCCC3)c(NCCCCCCCCCCNC(=O)C=3Oc4c(C(=O)C=3)c(OC)cc(OC)c4)c2cc1	CHEMBL2019038	0.35			LEGEND:
Clc1cc2[nH+]c3c(CCCC3)c(NCCC[NH+]3CCC(CC3)CC3Cc4c(cc(OC)c(OC)c4)C3=O)c2cc1	CHEMBL502725	0.27			Clc1cc2[nH+]c3c(C4CC(=CC(C4)C3)C)c(NCCC[NH+](CCCNc3c4CCCCc4[nH+]c4c3cccc4)C)c2cc1	CHEMBL2011487	0.42			Clc1cc2[nH+]c3c(C4CC(=CC(C4)C3)C)c(NCCC[NH+](CCCNc3c4CCCCc4[nH+]c4c3cccc4)C)c2cc1	CHEMBL2011487	0.42			AvI actives
Clc1cc2[nH+]c3c(CCCC3)c(NCCCC[NH+](CCCNc3c4c([nH+]c5c3[C@@H]3CC(=C[C@H](C5)C3)C)cc(Cl)cc4)C)c2cc1	CHEMBL2113367	0.29			Clc1cc2[nH+]c3c(CCCC3)c(NCCCNC(=O)CCCC[C@@H]3SSCC3)c2cc1	CHEMBL1912058	0.471			Clc1cc2[nH+]c3c(CCCC3)c(NCCCNC(=O)CCCC[C@@H]3SSCC3)c2cc1	CHEMBL1912058	0.471			HvL high activity ("actives")
[nH+]1c2c(CCCC2)c(NCCC[NH+](CCCNc2c3CCCCc3[nH+]c3c2cccc3)C)c2c1cccc2	CHEMBL338755	0.3			o1nc(c2c1cc1N(C)C(=O)Cc1c2)CCC1CC[NH+](CC1)Cc1ccccc1	CHEMBL1179697	0.479			o1nc(c2c1cc1N(C)C(=O)Cc1c2)CCC1CC[NH+](CC1)Cc1ccccc1	CHEMBL1179697	0.479			HvL low activity ("inactives")
Clc1cc2[nH+]c3c(CCCC3)c(NCCCCCCCCCCNC(=O)C=3Oc4c(cccc4)C(=O)C=3)c2cc1	CHEMBL2019032	0.3			o1nc(c2c1cc1CC(=O)N(c1c2)C)CCC1CC[NH+](CC1)Cc1ccccc1	CHEMBL426441	0.48			o1nc(c2c1cc1CC(=O)N(c1c2)C)CCC1CC[NH+](CC1)Cc1ccccc1	CHEMBL426441	0.48
o1nc(c2c1cc1NC(=O)Cc1c2)CCC1CC[NH+](CC1)Cc1ccccc1	CHEMBL359570	0.331			Oc1c2nc(ccc2ccc1C[NH2+]CCCCCCCCNc1c2CCCCc2[nH+]c2c1cccc2)C	CHEMBL1172618	0.5			Oc1c2nc(ccc2ccc1C[NH2+]CCCCCCCCNc1c2CCCCc2[nH+]c2c1cccc2)C	CHEMBL1172618	0.5
Clc1cc2[nH+]c3c(CCCC3)c(NCCCCCCCCCCNC(=O)C=3Oc4c(C(=O)C=3)c(OC)cc(OC)c4)c2cc1	CHEMBL2019038	0.35			o1nc(c2c1cc1NC(=O)CCc1c2)CCC1CC[NH+](CC1)Cc1ccccc1	CHEMBL329231	0.575			o1nc(c2c1cc1NC(=O)CCc1c2)CCC1CC[NH+](CC1)Cc1ccccc1	CHEMBL329231	0.575
Clc1cc2[nH+]c3c(CCCC3)c(NCCCCCCCCCCNC(=O)C=3Oc4c(C(=O)C=3)c(O)cc(OC)c4)c2cc1	CHEMBL2019048	0.35			O(C)c1cc2c([nH]cc2CCNC(=O)CCCCCCNc2c3CCCCc3[nH+]c3c2cccc3)cc1	CHEMBL382260	0.65			O(C)c1cc2c([nH]cc2CCNC(=O)CCCCCCNc2c3CCCCc3[nH+]c3c2cccc3)cc1	CHEMBL382260	0.65
Clc1c2c([nH+]c3c(CCCC3)c2NCCCCCCC(=O)NCCc2c3cc(OC)ccc3[nH]c2)cc(Cl)c1	CHEMBL372202	0.4			Clc1cc2[nH+]c3c(CCCC3)c(NCC[NH+]3CCC(CC3)CC3Cc4c(cc(OC)c(OC)c4)C3=O)c2cc1	CHEMBL447544	0.67			Clc1cc2[nH+]c3c(CCCC3)c(NCC[NH+]3CCC(CC3)CC3Cc4c(cc(OC)c(OC)c4)C3=O)c2cc1	CHEMBL447544	0.67
Clc1cc2[nH+]c3c(C4CC(=CC(C4)C3)C)c(NCCC[NH+](CCCNc3c4CCCCc4[nH+]c4c3cccc4)C)c2cc1	CHEMBL2011487	0.42			Clc1ccccc1C[N+](CCNC(=O)C(=O)NCC[N+](Cc1ccccc1Cl)(CC)CC)(CC)CC	CHEMBL1200541	0.7			Clc1ccccc1C[N+](CCNC(=O)C(=O)NCC[N+](Cc1ccccc1Cl)(CC)CC)(CC)CC	CHEMBL1200541	0.7
Clc1cc2[nH+]c3c([C@@H]4CC(=C[C@H](C3)C4)C)c(N)c2cc1	CHEMBL1994202	0.43			[nH+]1c2c(C3CC(=CC(C3)C2)CC)c(NCCCCCCCCNc2c3CCCCc3[nH+]c3c2cccc3)c2c1cccc2	CHEMBL535812	0.82			[nH+]1c2c(C3CC(=CC(C3)C2)CC)c(NCCCCCCCCNc2c3CCCCc3[nH+]c3c2cccc3)c2c1cccc2	CHEMBL535812	0.82
Oc1cc2c([nH]cc2CCNC(=O)CCCCCNc2c3CCCCc3[nH+]c3c2cccc3)cc1	CHEMBL370807	0.45			Clc1c2c([nH+]c3c(CCCC3)c2NCCCCCC(=O)NCCc2c3c([nH]c2)cccc3)ccc1	CHEMBL202661	0.87			Clc1c2c([nH+]c3c(CCCC3)c2NCCCCCC(=O)NCCc2c3c([nH]c2)cccc3)ccc1	CHEMBL202661	0.87
Clc1cc2[nH+]c3c(CCCC3)c(NCCCNC(=O)CCCC[C@@H]3SSCC3)c2cc1	CHEMBL1912058	0.471			O(C)c1cc2c(CC(CC3CC[NH+](CC3)CCCNc3c4CCCCc4[nH+]c4c3cccc4)C2=O)cc1OC	CHEMBL460370	0.88			O(C)c1cc2c(CC(CC3CC[NH+](CC3)CCCNc3c4CCCCc4[nH+]c4c3cccc4)C2=O)cc1OC	CHEMBL460370	0.88
o1nc(c2c1cc1N(C)C(=O)Cc1c2)CCC1CC[NH+](CC1)Cc1ccccc1	CHEMBL1179697	0.479			Clc1cc(C[NH2+]CCCCCCCCCNc2c3CCCCc3[nH+]c3c2cccc3)c(O)c2ncccc12	CHEMBL1172762	1			Clc1cc(C[NH2+]CCCCCCCCCNc2c3CCCCc3[nH+]c3c2cccc3)c(O)c2ncccc12	CHEMBL1172762	1
o1nc(c2c1cc1CC(=O)N(c1c2)C)CCC1CC[NH+](CC1)Cc1ccccc1	CHEMBL426441	0.48			O(C)c1ccccc1C[NH+](CCCCCCN1c2c(N(CCCCCC[NH+](Cc3ccccc3OC)CC)C(=O)C1=O)cccc2)CC	CHEMBL452339	1.41			O(C)c1ccccc1C[NH+](CCCCCCN1c2c(N(CCCCCC[NH+](Cc3ccccc3OC)CC)C(=O)C1=O)cccc2)CC	CHEMBL452339	1.41
Oc1ccc(cc1)C[NH+]1CCC(CC1)CCC(=O)c1cc2CCC(=O)n3c2c(c1)cc3	CHEMBL1651249	0.49			Clc1cc2[nH+]c3c(CCCC3)c(NCCC[NH+]3CCC(CC3)CC3Cc4cc(OC)c(OC)cc4C3)c2cc1	CHEMBL449991	1.6			Clc1cc2[nH+]c3c(CCCC3)c(NCCC[NH+]3CCC(CC3)CC3Cc4cc(OC)c(OC)cc4C3)c2cc1	CHEMBL449991	1.6
O=C(NCCc1c2c([nH]c1)cccc2)CCCCCCNc1c2CCCCc2[nH+]c2c1cccc2	CHEMBL199670	0.5			O1c2c(cc(OC)c(OC)c2)C(=O)C=C1C(=O)NCCCCCCCCCCNc1c2CCCCc2[nH+]c2c1cccc2	CHEMBL2019040	1.8			O1c2c(cc(OC)c(OC)c2)C(=O)C=C1C(=O)NCCCCCCCCCCNc1c2CCCCc2[nH+]c2c1cccc2	CHEMBL2019040	1.8
Oc1c2nc(ccc2ccc1C[NH2+]CCCCCCCCNc1c2CCCCc2[nH+]c2c1cccc2)C	CHEMBL1172618	0.5			Clc1cc2[nH+]c3c(CCCC3)c(NCCC[NH2+]CCCOc3c4c5c([nH]c4ccc3)cccc5)c2cc1	CHEMBL478666	2.15			Clc1cc2[nH+]c3c(CCCC3)c(NCCC[NH2+]CCCOc3c4c5c([nH]c4ccc3)cccc5)c2cc1	CHEMBL478666	2.15
o1nc(c2c1cc1NC(=O)CCc1c2)CCC1CC[NH+](CC1)Cc1ccccc1	CHEMBL329231	0.575			O(C)c1ccccc1C[NH+](CCCNC1=CC(=O)C(NCCC[NH+](Cc2ccccc2OC)CC)=CC1=O)CC	CHEMBL243271	2.25			O(C)c1ccccc1C[NH+](CCCNC1=CC(=O)C(NCCC[NH+](Cc2ccccc2OC)CC)=CC1=O)CC	CHEMBL243271	2.25
O(C)c1cc2c([nH]cc2CCNC(=O)CCCCCCNc2c3CCCCc3[nH+]c3c2cccc3)cc1	CHEMBL382260	0.65			Fc1ccccc1C[NH+]1CCC(CC1)CCC(=O)c1cc2CCC(=O)n3c2c(c1)cc3	CHEMBL1651131	2.51			Fc1ccccc1C[NH+]1CCC(CC1)CCC(=O)c1cc2CCC(=O)n3c2c(c1)cc3	CHEMBL1651131	2.51
Clc1cc2[nH+]c3c(CCCC3)c(NCCCCCCCCCCNC(=O)C=3Oc4c(C(=O)C=3)c(O)cc(O)c4)c2cc1	CHEMBL2019049	0.65			S1c2cc(OC)c(OC)cc2CC1C(=O)CCc1cc[n+](cc1)Cc1ccc(F)cc1	CHEMBL187818	2.6			S1c2cc(OC)c(OC)cc2CC1C(=O)CCc1cc[n+](cc1)Cc1ccc(F)cc1	CHEMBL187818	2.6
Clc1cc2[nH+]c3c(CCCC3)c(NCC[NH+]3CCC(CC3)CC3Cc4c(cc(OC)c(OC)c4)C3=O)c2cc1	CHEMBL447544	0.67			O(CCC[NH+]1CCCCC1)c1ccc(cc1)CCNc1c2CCCCc2[nH+]c2c1cccc2	CHEMBL15056	2.6			O(CCC[NH+]1CCCCC1)c1ccc(cc1)CCNc1c2CCCCc2[nH+]c2c1cccc2	CHEMBL15056	2.6
Clc1ccccc1C[N+](CCNC(=O)C(=O)NCC[N+](Cc1ccccc1Cl)(CC)CC)(CC)CC	CHEMBL1200541	0.7			Clc1cc2[nH+]c3c(CCCC3)c(NCCCNC(=O)CCCCc3sccc3)c2cc1	CHEMBL1912060	2.66			Clc1cc2[nH+]c3c(CCCC3)c(NCCCNC(=O)CCCCc3sccc3)c2cc1	CHEMBL1912060	2.66
O1c2c(cc(OC)cc2)C(=O)C=C1C(=O)NCCCCCCCCCCNc1c2CCCCc2[nH+]c2c1cccc2	CHEMBL2019034	0.775			o1nc(c2c1cc(NC(=O)C)cc2)CCC1CC[NH+](CC1)Cc1ccccc1	CHEMBL92736	2.82			o1nc(c2c1cc(NC(=O)C)cc2)CCC1CC[NH+](CC1)Cc1ccccc1	CHEMBL92736	2.82
o1nc(c2c1cc(cc2)C1CCCCC1)CCC1CC[NH+](CC1)Cc1ccccc1	CHEMBL1651247	0.794			S1C[C@]2([C@H]3[C@@]4([C@]5([C@@H](CC3)[C@@]3(C[C@@H](O)[C@H]([C@@H]([NH+](Cc6cc(ccc6)C(F)(F)F)C)C)[C@]3(CC5=O)C)C)C4)CC[C@@H]2N=C1C(C)C)C	CHEMBL1783517	3			S1C[C@]2([C@H]3[C@@]4([C@]5([C@@H](CC3)[C@@]3(C[C@@H](O)[C@H]([C@@H]([NH+](Cc6cc(ccc6)C(F)(F)F)C)C)[C@]3(CC5=O)C)C)C4)CC[C@@H]2N=C1C(C)C)C	CHEMBL1783517	3
[nH+]1c2c(C3CC(=CC(C3)C2)CC)c(NCCCCCCCCNc2c3CCCCc3[nH+]c3c2cccc3)c2c1cccc2	CHEMBL535812	0.82			o1nc(c2c1c1CC(=O)Nc1cc2)CCC1CC[NH+](CC1)Cc1ccccc1	CHEMBL95020	3.63			o1nc(c2c1c1CC(=O)Nc1cc2)CCC1CC[NH+](CC1)Cc1ccccc1	CHEMBL95020	3.63
Clc1c2c([nH+]c3c(CCCC3)c2NCCCCCC(=O)NCCc2c3c([nH]c2)cccc3)ccc1	CHEMBL202661	0.87			O=C1N2CCCc3cc(cc(C1)c23)C(=O)CCC1CC[NH+](CC1)Cc1ccccc1	CHEMBL1651129	3.63			O=C1N2CCCc3cc(cc(C1)c23)C(=O)CCC1CC[NH+](CC1)Cc1ccccc1	CHEMBL1651129	3.63
O(C)c1cc2c(CC(CC3CC[NH+](CC3)CCCNc3c4CCCCc4[nH+]c4c3cccc4)C2=O)cc1OC	CHEMBL460370	0.88			[nH+]1c2c(CCCC2)c(NCCCCCCCNc2c3CCCCc3[nH+]c3c2cccc3)c2c1cccc2	CHEMBL32823	4			[nH+]1c2c(CCCC2)c(NCCCCCCCNc2c3CCCCc3[nH+]c3c2cccc3)c2c1cccc2	CHEMBL32823	4
Clc1cc2[nH+]c3c(C4CC(=CC(C4)C3)C)c(NCCCCCCNc3c4CCCCc4[nH+]c4c3cccc4)c2cc1	CHEMBL2011483	0.89			S1c2cc(OC)c(OC)cc2CC1C(=O)CCc1cc[n+](cc1)Cc1cc(oc1)[N+](=O)[O-]	CHEMBL610242	4.5			S1c2cc(OC)c(OC)cc2CC1C(=O)CCc1cc[n+](cc1)Cc1cc(oc1)[N+](=O)[O-]	CHEMBL610242	4.5
Clc1cc2[nH+]c3c(CCCC3)c(NCCCCCCCCCCNC(=O)C=3Oc4c(cc(O)c(O)c4)C(=O)C=3)c2cc1	CHEMBL2019053	0.9			Clc1cc(ccc1)C[NH+]1CCC(CC1)CCC(=O)c1cc2CCC(=O)n3c2c(c1)cc3	CHEMBL1651134	4.9			Clc1cc(ccc1)C[NH+]1CCC(CC1)CCC(=O)c1cc2CCC(=O)n3c2c(c1)cc3	CHEMBL1651134	4.9
o1nc(c2c1cc1CC(=O)Nc1c2)CCC1CC[NH+](CC1)Cc1ccccc1	CHEMBL328468	0.955			O=C(NCCCCCCCNc1c2CCCCc2[nH+]c2c1cccc2)c1c2c(nc(N3CC[NH+](CC3)C)c1C)cccc2	CHEMBL195241	5			O=C(NCCCCCCCNc1c2CCCCc2[nH+]c2c1cccc2)c1c2c(nc(N3CC[NH+](CC3)C)c1C)cccc2	CHEMBL195241	5
Clc1cc(C[NH2+]CCCCCCCCCNc2c3CCCCc3[nH+]c3c2cccc3)c(O)c2ncccc12	CHEMBL1172762	1			O(C)c1cc2CC(Cc2cc1OC)CC1CC[NH+](CC1)CCNc1c2CCCCc2[nH+]c2c1cccc2	CHEMBL486507	5.13			O(C)c1cc2CC(Cc2cc1OC)CC1CC[NH+](CC1)CCNc1c2CCCCc2[nH+]c2c1cccc2	CHEMBL486507	5.13
Clc1cc2[nH+]c3c(CCCC3)c(NCCCCCCCCCCNC(=O)C=3Oc4c(cc(O)cc4)C(=O)C=3)c2cc1	CHEMBL2019044	1			FC=1C(=O)C(NCCCCCC[NH+](Cc2ccccc2OC)CC)=C(F)C(=O)C=1NCCCCCC[NH+](Cc1ccccc1OC)CC	CHEMBL243055	5.17			FC=1C(=O)C(NCCCCCC[NH+](Cc2ccccc2OC)CC)=C(F)C(=O)C=1NCCCCCC[NH+](Cc1ccccc1OC)CC	CHEMBL243055	5.17
O1c2c(C(=O)C=C1C(=O)NCCCCCCCCCCNc1c3CCCCc3[nH+]c3c1cccc3)c(O)cc(OC)c2	CHEMBL2019046	1			[nH+]1c2c(CCCC2)c(NCCCCCCC[NH2+]Cc2ccccc2N(C)C)c2c1cccc2	CHEMBL2147460	5.18			[nH+]1c2c(CCCC2)c(NCCCCCCC[NH2+]Cc2ccccc2N(C)C)c2c1cccc2	CHEMBL2147460	5.18
Oc1ccccc1C[NH+]1CCC(CC1)CCC(=O)c1cc2CCC(=O)n3c2c(c1)cc3	CHEMBL1651139	1.1			O(C)c1c(OC)cc(cc1OC)C(=O)NCCCCCCCCC(=O)NNc1c2CCCCc2cc2c1cccc2	CHEMBL374981	5.8			O(C)c1c(OC)cc(cc1OC)C(=O)NCCCCCCCCC(=O)NNc1c2CCCCc2cc2c1cccc2	CHEMBL374981	5.8
Fc1cc(ccc1)C[NH+]1CCC(CC1)CCC(=O)c1cc2CCC(=O)n3c2c(c1)cc3	CHEMBL1651132	1.29			o1nc(c2cc(C)c(OC)cc12)CCC1CC[NH+](CC1)Cc1ccccc1	CHEMBL188823	5.8			o1nc(c2cc(C)c(OC)cc12)CCC1CC[NH+](CC1)Cc1ccccc1	CHEMBL188823	5.8
O(C)c1ccccc1C[NH+](CCCCCCN1c2c(N(CCCCCC[NH+](Cc3ccccc3OC)CC)C(=O)C1=O)cccc2)CC	CHEMBL452339	1.41			S1c2cc(OC)c(OC)cc2CC1C(=O)CCc1cc[n+](cc1)Cc1ccsc1	CHEMBL362752	6			S1c2cc(OC)c(OC)cc2CC1C(=O)CCc1cc[n+](cc1)Cc1ccsc1	CHEMBL362752	6
Clc1cc2[nH+]c3c(CCCC3)c(NCCC[NH2+]CCCCCOc3c4c5c([nH]c4ccc3)cccc5)c2cc1	CHEMBL473866	1.54			S1C[C@]2([C@H]3[C@@]4([C@]5([C@@H](CC3)[C@@]3(C[C@@H](O)[C@H]([C@@H]([NH+](Cc6ccccc6OC)C)C)[C@]3(CC5=O)C)C)C4)CC[C@@H]2N=C1C(C)C)C	CHEMBL1783528	6			S1C[C@]2([C@H]3[C@@]4([C@]5([C@@H](CC3)[C@@]3(C[C@@H](O)[C@H]([C@@H]([NH+](Cc6ccccc6OC)C)C)[C@]3(CC5=O)C)C)C4)CC[C@@H]2N=C1C(C)C)C	CHEMBL1783528	6
Clc1cc2[nH+]c3c(CCCC3)c(NCCC[NH+]3CCC(CC3)CC3Cc4cc(OC)c(OC)cc4C3)c2cc1	CHEMBL449991	1.6			S1c2cc(OC)c(OC)cc2CC1C(=O)CCc1cc[n+](cc1)CC=C	CHEMBL189122	6.27			S1c2cc(OC)c(OC)cc2CC1C(=O)CCc1cc[n+](cc1)CC=C	CHEMBL189122	6.27
Clc1cc2[nH+]c3c(CCCC3)c(NCCC[NH2+]CCCCOc3c4c5c([nH]c4ccc3)cccc5)c2cc1	CHEMBL478667	1.65			S1c2cc(OC)c(OC)cc2CC1C(=O)CCc1cc[n+](cc1)CCOCC	CHEMBL186264	7			S1c2cc(OC)c(OC)cc2CC1C(=O)CCc1cc[n+](cc1)CCOCC	CHEMBL186264	7
O1c2c(cc(OC)c(OC)c2)C(=O)C=C1C(=O)NCCCCCCCCCCNc1c2CCCCc2[nH+]c2c1cccc2	CHEMBL2019040	1.8			o1nc(c2cc(OC)ccc12)CCC1CC[NH+](CC1)Cc1ccccc1	CHEMBL94186	7.24			o1nc(c2cc(OC)ccc12)CCC1CC[NH+](CC1)Cc1ccccc1	CHEMBL94186	7.24
O=C(CCCNc1c2CCCCc2[nH+]c2c1cccc2)CCCNc1c2CCCCc2[nH+]c2c1cccc2	CHEMBL238230	1.83			s1c2cc(OC)c(OC)cc2cc1C(=O)C1CCC[N+](CC1)(Cc1ccccc1)C	CHEMBL186144	8			s1c2cc(OC)c(OC)cc2cc1C(=O)C1CCC[N+](CC1)(Cc1ccccc1)C	CHEMBL186144	8
Clc1cc2[nH+]c3c(CCCC3)c(NCCC[NH2+]CCCOc3c4c5c([nH]c4ccc3)cccc5)c2cc1	CHEMBL478666	2.15			Clc1cc2[nH+]c3c(C4CC(=CC(C4)C3)C)c(NCCN=[N+]=[N-])c2cc1	CHEMBL574973	8.69			Clc1cc2[nH+]c3c(C4CC(=CC(C4)C3)C)c(NCCN=[N+]=[N-])c2cc1	CHEMBL574973	8.69
O(C)c1cc2CC(Cc2cc1OC)CC1CC[NH+](CC1)CCCNc1c2CCCCc2[nH+]c2c1cccc2	CHEMBL486508	2.16			Oc1cc(ccc1)C[NH+]1CCC(CC1)CCC(=O)c1cc2CCC(=O)n3c2c(c1)cc3	CHEMBL1651140	8.71			Oc1cc(ccc1)C[NH+]1CCC(CC1)CCC(=O)c1cc2CCC(=O)n3c2c(c1)cc3	CHEMBL1651140	8.71
O(C)c1ccccc1C[NH+](CCCNC1=CC(=O)C(NCCC[NH+](Cc2ccccc2OC)CC)=CC1=O)CC	CHEMBL243271	2.25			Clc1cc2[nH+]c3c(C4CC(=CC(C4)C3)C)c(NCCO)c2cc1	CHEMBL583920	9.66			Clc1cc2[nH+]c3c(C4CC(=CC(C4)C3)C)c(NCCO)c2cc1	CHEMBL583920	9.66
O1c2c(C(=O)C=C1C(=O)NCCCCCCCCCCNc1c3CCCCc3[nH+]c3c1cccc3)c(OC)cc(OC)c2	CHEMBL2019037	2.3			O=C(CCC1CC[NH+](CC1)Cc1ccccc1)c1cc2nc([nH]c2cc1)C	CHEMBL1084790	12.2			O=C(CCC1CC[NH+](CC1)Cc1ccccc1)c1cc2nc([nH]c2cc1)C	CHEMBL1084790	12.2
O1c2c(C(=O)C=C1C(=O)NCCCCCCCCCCNc1c3CCCCc3[nH+]c3c1cccc3)c(O)cc(O)c2	CHEMBL2019047	2.3			Clc1cc2[nH+]c3c(CCCC3)c(N)c2cc1	CHEMBL292314	13.2			Clc1cc2[nH+]c3c(CCCC3)c(N)c2cc1	CHEMBL292314	13.2
O(C)c1ccccc1C[NH+](CCCCCNC1=CC(=O)C(NCCCCC[NH+](Cc2ccccc2OC)CC)=CC1=O)CC	CHEMBL230702	2.36			O(C)c1ccccc1C[NH+](CCCCNC1=CC(=O)C(NCCCC[NH+](Cc2ccccc2OC)CC)=CC1=O)CC	CHEMBL243272	13.6			O(C)c1ccccc1C[NH+](CCCCNC1=CC(=O)C(NCCCC[NH+](Cc2ccccc2OC)CC)=CC1=O)CC	CHEMBL243272	13.6
Fc1ccccc1C[NH+]1CCC(CC1)CCC(=O)c1cc2CCC(=O)n3c2c(c1)cc3	CHEMBL1651131	2.51			S(=O)(=O)(Nc1cc2onc(c2cc1)CCC1CC[NH+](CC1)Cc1ccccc1)C	CHEMBL1651246	14.13			S(=O)(=O)(Nc1cc2onc(c2cc1)CCC1CC[NH+](CC1)Cc1ccccc1)C	CHEMBL1651246	14.13
Clc1cc2[nH+]c3c(CCCC3)c(NCCC[NH2+]CCCCCCOc3c4c5c([nH]c4ccc3)cccc5)c2cc1	CHEMBL474268	2.57			O=C1N2CCCc3cc(cc(CC1)c23)C(=O)CCC1CC[NH+](CC1)Cc1ccccc1	CHEMBL1651244	15.85			O=C1N2CCCc3cc(cc(CC1)c23)C(=O)CCC1CC[NH+](CC1)Cc1ccccc1	CHEMBL1651244	15.85
S1c2cc(OC)c(OC)cc2CC1C(=O)CCc1cc[n+](cc1)Cc1ccc(F)cc1	CHEMBL187818	2.6			[n+]1(ccc(cc1)C(C)(C)C)CCCCCCC[n+]1ccc(cc1)C(C)(C)C	CHEMBL1642976	16			[n+]1(ccc(cc1)C(C)(C)C)CCCCCCC[n+]1ccc(cc1)C(C)(C)C	CHEMBL1642976	16
O(CCC[NH+]1CCCCC1)c1ccc(cc1)CCNc1c2CCCCc2[nH+]c2c1cccc2	CHEMBL15056	2.6			Clc1cc2[nH+]c3c(CCCC3)c(NCCCCNC(=O)CCc3cc4c(nc(c5CCCOc45)-c4ccccc4)cc3)c2cc1	CHEMBL540169	16.6			Clc1cc2[nH+]c3c(CCCC3)c(NCCCCNC(=O)CCc3cc4c(nc(c5CCCOc45)-c4ccccc4)cc3)c2cc1	CHEMBL540169	16.6
Clc1cc2[nH+]c3c(CCCC3)c(NCC[NH+]3CCC(CC3)CC3Cc4cc(OC)c(OC)cc4C3)c2cc1	CHEMBL520046	2.6			O(C)c1ccccc1CC[NH+](CCCCCCNC1=CC(=O)C(NCCCCCC[NH+](CCc2ccccc2OC)CC)=CC1=O)CC	CHEMBL394348	17.3			O(C)c1ccccc1CC[NH+](CCCCCCNC1=CC(=O)C(NCCCCCC[NH+](CCc2ccccc2OC)CC)=CC1=O)CC	CHEMBL394348	17.3
Clc1cc2[nH+]c3c(CCCC3)c(NCCCNC(=O)CCCCc3sccc3)c2cc1	CHEMBL1912060	2.66			O(CCNc1c2CCCCc2[nH+]c2c1cccc2)CCOCCNc1c2CCCCc2[nH+]c2c1cccc2	CHEMBL235014	19.7			O(CCNc1c2CCCCc2[nH+]c2c1cccc2)CCOCCNc1c2CCCCc2[nH+]c2c1cccc2	CHEMBL235014	19.7
o1nc(c2c1cc(NC(=O)C)cc2)CCC1CC[NH+](CC1)Cc1ccccc1	CHEMBL92736	2.82			S1C[C@]2([C@H]3[C@@]4([C@]5([C@@H](CC3)[C@@]3(C[C@@H](O)[C@H]([C@@H]([NH+](CCc6ccccc6)C)C)[C@]3(CC5=O)C)C)C4)CC[C@@H]2N=C1C(C)C)C	CHEMBL1783526	20			S1C[C@]2([C@H]3[C@@]4([C@]5([C@@H](CC3)[C@@]3(C[C@@H](O)[C@H]([C@@H]([NH+](CCc6ccccc6)C)C)[C@]3(CC5=O)C)C)C4)CC[C@@H]2N=C1C(C)C)C	CHEMBL1783526	20
O=C1n2c3c(cc(cc3cc2)C(=O)CCC2CC[NH+](CC2)Cc2cc([N+](=O)[O-])ccc2)CC1	CHEMBL1651243	2.88			Fc1ccc(cc1)C([NH+]1CC[NH+](CC1)CC[NH+]1CCCC1)c1ccc(F)cc1	CHEMBL427232	21			Fc1ccc(cc1)C([NH+]1CC[NH+](CC1)CC[NH+]1CCCC1)c1ccc(F)cc1	CHEMBL427232	21
S1C[C@]2([C@H]3[C@@]4([C@]5([C@@H](CC3)[C@@]3(C[C@@H](O)[C@H]([C@@H]([NH+](Cc6ccc(cc6)C(F)(F)F)C)C)[C@]3(CC5=O)C)C)C4)CC[C@@H]2N=C1C(C)C)C	CHEMBL1783518	3			O=C1NC2=C(C=C1)[C@@]/1(\N=C\c3ccc(cc3)C#N)CC(=C[C@@H](C2)\C\1=C/C)C	CHEMBL596236	22			O=C1NC2=C(C=C1)[C@@]/1(\N=C\c3ccc(cc3)C#N)CC(=C[C@@H](C2)\C\1=C/C)C	CHEMBL596236	22
S1C[C@]2([C@H]3[C@@]4([C@]5([C@@H](CC3)[C@@]3(C[C@@H](O)[C@H]([C@@H]([NH+](Cc6cc(ccc6)C(F)(F)F)C)C)[C@]3(CC5=O)C)C)C4)CC[C@@H]2N=C1C(C)C)C	CHEMBL1783517	3			O=C(CCC1CC[NH+](CC1)Cc1ccccc1)c1cc2c(CCC[NH2+]C2)cc1	CHEMBL1651126	22.91			O=C(CCC1CC[NH+](CC1)Cc1ccccc1)c1cc2c(CCC[NH2+]C2)cc1	CHEMBL1651126	22.91
S1C[C@]2([C@H]3[C@@]4([C@]5([C@@H](CC3)[C@@]3(C[C@@H](O)[C@H]([C@@H]([NH+](Cc6cc(OC)ccc6)C)C)[C@]3(CC5=O)C)C)C4)CC[C@@H]2N=C1C(C)C)C	CHEMBL1783514	3			[n+]1(ccc(cc1)C(C)(C)C)\C=C\1/CC=C2C(C\C(\C=C2)=C\[n+]2ccc(cc2)C(C)(C)C)=C/1	CHEMBL1642988	24			[n+]1(ccc(cc1)C(C)(C)C)\C=C\1/CC=C2C(C\C(\C=C2)=C\[n+]2ccc(cc2)C(C)(C)C)=C/1	CHEMBL1642988	24
O(C)c1ccccc1C[NH+](CCCCCC(=O)N1CCC(CC1)C1CCN(CC1)C(=O)CCCCC[NH+](Cc1ccccc1OC)CC)CC	CHEMBL254016	3.32			O(CCC[NH+]1CCCCC1)c1ccc(cc1)C(=O)c1ccc(cc1)C[NH+](Cc1ccccc1)C	CHEMBL1773483	24			O(CCC[NH+]1CCCCC1)c1ccc(cc1)C(=O)c1ccc(cc1)C[NH+](Cc1ccccc1)C	CHEMBL1773483	24
ClC=1C(=O)C(NCCCCCC[NH+](Cc2ccccc2OC)CC)=C(Cl)C(=O)C=1NCCCCCC[NH+](Cc1ccccc1OC)CC	CHEMBL243056	3.5			O(CCC[NH+](CC)CC)c1ccc(cc1)C(=O)c1ccc(cc1)C[NH+](Cc1ccccc1)C	CHEMBL1773482	25			O(CCC[NH+](CC)CC)c1ccc(cc1)C(=O)c1ccc(cc1)C[NH+](Cc1ccccc1)C	CHEMBL1773482	25
O=C1N2CCCc3cc(cc(C1)c23)C(=O)CCC1CC[NH+](CC1)Cc1ccccc1	CHEMBL1651129	3.63			O=C1[C@]23[C@@H](CC[C@@H]4[C@@]2(CC[C@@H]2N=C(C=C[C@]24C)C(C)C)C3)[C@@]2(C[C@@H](O)[C@H]([C@@H]([NH+](C)C)C)[C@]2(C1)C)C	CHEMBL1783534	25			O=C1[C@]23[C@@H](CC[C@@H]4[C@@]2(CC[C@@H]2N=C(C=C[C@]24C)C(C)C)C3)[C@@]2(C[C@@H](O)[C@H]([C@@H]([NH+](C)C)C)[C@]2(C1)C)C	CHEMBL1783534	25
o1nc(c2c1c1CC(=O)Nc1cc2)CCC1CC[NH+](CC1)Cc1ccccc1	CHEMBL95020	3.63			O=C(CCC1CC[NH+](CC1)Cc1ccccc1)c1cc2CC[NH2+]CCc2cc1	CHEMBL1651127	25.12			O=C(CCC1CC[NH+](CC1)Cc1ccccc1)c1cc2CC[NH2+]CCc2cc1	CHEMBL1651127	25.12
[nH+]1c2c(CCCC2)c(NCCCCCCCNc2c3CCCCc3[nH+]c3c2cccc3)c2c1cccc2	CHEMBL32823	4			O(C)c1ccccc1C[NH+](CCCCCC(=O)N1CCN(CC1)C(=O)CCCCC[NH+](Cc1ccccc1OC)CC)CC	CHEMBL502877	25.7			O(C)c1ccccc1C[NH+](CCCCCC(=O)N1CCN(CC1)C(=O)CCCCC[NH+](Cc1ccccc1OC)CC)CC	CHEMBL502877	25.7
S1c2cc(OC)c(OC)cc2CC1C(=O)CCc1cc[n+](cc1)Cc1cc(oc1)[N+](=O)[O-]	CHEMBL610242	4.5			O(C)c1ccccc1C[NH+](CCCCCCNC1=CC(=O)c2ncccc2C1=O)CC	CHEMBL1940613	27.9			O(C)c1ccccc1C[NH+](CCCCCCNC1=CC(=O)c2ncccc2C1=O)CC	CHEMBL1940613	27.9
Fc1ccc(cc1)C[NH+]1CCC(CC1)CCC(=O)c1cc2CCC(=O)n3c2c(c1)cc3	CHEMBL1651248	4.57			s1c2cc(OC)c(OC)cc2cc1C(=O)C1CCC[N+](CC1)(CC1OCCCC1)C	CHEMBL372491	28			s1c2cc(OC)c(OC)cc2cc1C(=O)C1CCC[N+](CC1)(CC1OCCCC1)C	CHEMBL372491	28
S1c2cc(OC)c(OC)cc2CC1C(=O)CCc1cc[n+](cc1)Cc1ccccc1	CHEMBL186042	4.6			O=C(CCc1ccc([N+](CC=C)(C)C)cc1)CCc1ccc([N+](CC=C)(C)C)cc1	CHEMBL464538	30			O=C(CCc1ccc([N+](CC=C)(C)C)cc1)CCc1ccc([N+](CC=C)(C)C)cc1	CHEMBL464538	30
Clc1cc(ccc1)C[NH+]1CCC(CC1)CCC(=O)c1cc2CCC(=O)n3c2c(c1)cc3	CHEMBL1651134	4.9			O1CCOc2c1cc(cc2)C(=O)CCC1CC[NH+](CC1)Cc1ccccc1	CHEMBL1196495	30.2			O1CCOc2c1cc(cc2)C(=O)CCC1CC[NH+](CC1)Cc1ccccc1	CHEMBL1196495	30.2
O=C(NCCCCCCCNc1c2CCCCc2[nH+]c2c1cccc2)c1c2c(nc(N3CC[NH+](CC3)C)c1C)cccc2	CHEMBL195241	5			s1c2cc(OC)c(OC)cc2cc1C(=O)C1CCC[N+](CC1)(Cc1oc([N+](=O)[O-])cc1)C	CHEMBL610243	32			s1c2cc(OC)c(OC)cc2cc1C(=O)C1CCC[N+](CC1)(Cc1oc([N+](=O)[O-])cc1)C	CHEMBL610243	32
Clc1ccccc1C[NH+]1CCC(CC1)CCC(=O)c1cc2CCC(=O)n3c2c(c1)cc3	CHEMBL1651133	5.13			O=C(CCC1CC[NH+](CC1)Cc1ccccc1)c1cc2NC(Nc2cc1)c1ccccc1	CHEMBL1651125	33.11			O=C(CCC1CC[NH+](CC1)Cc1ccccc1)c1cc2NC(Nc2cc1)c1ccccc1	CHEMBL1651125	33.11
O(C)c1cc2CC(Cc2cc1OC)CC1CC[NH+](CC1)CCNc1c2CCCCc2[nH+]c2c1cccc2	CHEMBL486507	5.13			S1SCCC1CCCCC(=O)NCCCCCNc1c2CCCCc2[nH+]c2c1cccc2	CHEMBL425739	38.4			S1SCCC1CCCCC(=O)NCCCCCNc1c2CCCCc2[nH+]c2c1cccc2	CHEMBL425739	38.4
FC=1C(=O)C(NCCCCCC[NH+](Cc2ccccc2OC)CC)=C(F)C(=O)C=1NCCCCCC[NH+](Cc1ccccc1OC)CC	CHEMBL243055	5.17			[NH+]1(CCC(CC1)CCN=C1NN=C(C(=C1)C)c1ccccc1)Cc1ccccc1	CHEMBL1204299	39			[NH+]1(CCC(CC1)CCN=C1NN=C(C(=C1)C)c1ccccc1)Cc1ccccc1	CHEMBL1204299	39
[nH+]1c2c(CCCC2)c(NCCCCCCC[NH2+]Cc2ccccc2N(C)C)c2c1cccc2	CHEMBL2147460	5.18			O1CC[NH2+]Cc2cc(ccc12)C(=O)CCC1CC[NH+](CC1)Cc1ccccc1	CHEMBL1651128	39.81			O1CC[NH2+]Cc2cc(ccc12)C(=O)CCC1CC[NH+](CC1)Cc1ccccc1	CHEMBL1651128	39.81
O(C)c1c(OC)cc(cc1OC)C(=O)NCCCCCCCC(=O)NNc1c2CCCCc2[nH+]c2c1cccc2	CHEMBL216159	5.24			O(C)c1c(OC)cc(cc1OC)CCC(=O)NCC(=O)NNc1c2CCCCc2[nH+]c2c1cccc2	CHEMBL445846	40.7			O(C)c1c(OC)cc(cc1OC)CCC(=O)NCC(=O)NNc1c2CCCCc2[nH+]c2c1cccc2	CHEMBL445846	40.7
Clc1cc2[nH+]c3c(CCCC3)c(NNC(=O)CCCCCNC(=O)c3ccc(OCC[N+](CC)(CC)CC)cc3)c2cc1	CHEMBL540131	5.44			S(Oc1ccccc1\C=N\[C@@]1/2CC(=C[C@@H](CC=3NC(=O)C=CC1=3)\C\2=C/C)C)(=O)(=O)[O-]	CHEMBL596457	41			S(Oc1ccccc1\C=N\[C@@]1/2CC(=C[C@@H](CC=3NC(=O)C=CC1=3)\C\2=C/C)C)(=O)(=O)[O-]	CHEMBL596457	41
Oc1c2ncccc2ccc1C[NH2+]CCCCCCCCCNc1c2CCCCc2[nH+]c2c1cccc2	CHEMBL1173662	5.5			O(C)c1ccccc1C[NH+](CCCCCCNc1ccc(NCCCCCC[NH+](Cc2ccccc2OC)CC)cc1)CC	CHEMBL230434	42.5			O(C)c1ccccc1C[NH+](CCCCCCNc1ccc(NCCCCCC[NH+](Cc2ccccc2OC)CC)cc1)CC	CHEMBL230434	42.5
O(C)c1c(OC)cc(cc1OC)C(=O)NCCCCCCCCC(=O)NNc1c2CCCCc2cc2c1cccc2	CHEMBL374981	5.8			O1c2cc(OC)c(OC)cc2C=C(NC(=O)[C@@H]2C[C@H]([NH2+]Cc3ccccc3)CCC2)C1=O	CHEMBL2314726	43			O1c2cc(OC)c(OC)cc2C=C(NC(=O)[C@@H]2C[C@H]([NH2+]Cc3ccccc3)CCC2)C1=O	CHEMBL2314726	43
o1nc(c2cc(C)c(OC)cc12)CCC1CC[NH+](CC1)Cc1ccccc1	CHEMBL188823	5.8			S1C[C@]2([C@H]3[C@@]4([C@]5([C@@H](CC3)[C@@]3(C[C@@H](O)[C@H]([C@@H](N(C(=O)c6ccccc6)C)C)[C@]3(CC5=O)C)C)C4)CC[C@@H]2N=C1C(C)C)C	CHEMBL1783523	43			S1C[C@]2([C@H]3[C@@]4([C@]5([C@@H](CC3)[C@@]3(C[C@@H](O)[C@H]([C@@H](N(C(=O)c6ccccc6)C)C)[C@]3(CC5=O)C)C)C4)CC[C@@H]2N=C1C(C)C)C	CHEMBL1783523	43
S1c2cc(OC)c(OC)cc2CC1C(=O)CCc1cc[n+](cc1)Cc1ccsc1	CHEMBL362752	6			S1(=O)(=O)N(CCCCCCCC[NH+]2Cc3c4[C@]5([C@@H](Oc4c(OC)cc3)C[C@@H](O)C=C5)CC2)C(=O)c2c1cccc2	CHEMBL1794936	50			S1(=O)(=O)N(CCCCCCCC[NH+]2Cc3c4[C@]5([C@@H](Oc4c(OC)cc3)C[C@@H](O)C=C5)CC2)C(=O)c2c1cccc2	CHEMBL1794936	50
S1C[C@]2([C@H]3[C@@]4([C@]5([C@@H](CC3)[C@@]3(C[C@@H](O)[C@H]([C@@H]([NH+](Cc6ccccc6OC)C)C)[C@]3(CC5=O)C)C)C4)CC[C@@H]2N=C1C(C)C)C	CHEMBL1783528	6			Brc1cc2onc(c2cc1)CCC1CC[NH+](CC1)Cc1ccccc1	CHEMBL330004	50.12			Brc1cc2onc(c2cc1)CCC1CC[NH+](CC1)Cc1ccccc1	CHEMBL330004	50.12
S1c2cc(OC)c(OC)cc2CC1C(=O)CCc1cc[n+](cc1)CC=C	CHEMBL189122	6.27			O=C1NC2=C(C=C1)[C@@]/1(\N=C\C(=C\c3ccccc3)\CCCCC)CC(=C[C@@H](C2)\C\1=C/C)C	CHEMBL594186	51			O=C1NC2=C(C=C1)[C@@]/1(\N=C\C(=C\c3ccccc3)\CCCCC)CC(=C[C@@H](C2)\C\1=C/C)C	CHEMBL594186	51
O1c2c(cc(O)c(O)c2)C(=O)C=C1C(=O)NCCCCCCCCCCNc1c2CCCCc2[nH+]c2c1cccc2	CHEMBL2019052	6.5			O(C)c1c(OC)cc(cc1OC)C(=O)NCC(=O)NNc1c2CCCCc2[nH+]c2c1cccc2	CHEMBL385269	51.6			O(C)c1c(OC)cc(cc1OC)C(=O)NCC(=O)NNc1c2CCCCc2[nH+]c2c1cccc2	CHEMBL385269	51.6
Clc1cc2[nH+]c3c(C4CC(=CC(C4)C3)CC)c(NCCO)c2cc1	CHEMBL573095	6.75			O=C(CCC1CC[NH+](CC1)Cc1ccccc1)c1cc2CCNc2cc1	CHEMBL75110	52.48			O=C(CCC1CC[NH+](CC1)Cc1ccccc1)c1cc2CCNc2cc1	CHEMBL75110	52.48
S1SCCC1CCCCC(=O)NCCCNc1c2CCCCc2[nH+]c2c1cccc2	CHEMBL195179	6.96			O=C1N2CCc3cc(cc(CCC1)c23)C(=O)CCC1CC[NH+](CC1)Cc1ccccc1	CHEMBL1651245	52.48			O=C1N2CCc3cc(cc(CCC1)c23)C(=O)CCC1CC[NH+](CC1)Cc1ccccc1	CHEMBL1651245	52.48
S1C[C@]2([C@H]3[C@@]4([C@]5([C@@H](CC3)[C@@]3(C[C@@H](O)[C@H]([C@@H]([NH+](Cc6ccccc6)C)C)[C@]3(CC5=O)C)C)C4)CC[C@@H]2N=C1C(C)C)C	CHEMBL1783525	7			O(CCCCC[NH+](CC)CC)c1cc2c(cc1)C(=O)/C(/CC2)=C/c1ccc(cc1)C[NH+](Cc1ccccc1)C	CHEMBL597188	56			O(CCCCC[NH+](CC)CC)c1cc2c(cc1)C(=O)/C(/CC2)=C/c1ccc(cc1)C[NH+](Cc1ccccc1)C	CHEMBL597188	56
S1c2cc(OC)c(OC)cc2CC1C(=O)CCc1cc[n+](cc1)CCOCC	CHEMBL186264	7			S1C[C@]2([C@H]3[C@@]4([C@]5([C@@H](CC3)[C@@]3(C[C@@H](O)[C@H]([C@@H]([NH+](C)C)C)[C@]3(CC5=O)C)C)C4)CC[C@@H]2N=C1C(C)C)C	CHEMBL1783520	60			S1C[C@]2([C@H]3[C@@]4([C@]5([C@@H](CC3)[C@@]3(C[C@@H](O)[C@H]([C@@H]([NH+](C)C)C)[C@]3(CC5=O)C)C)C4)CC[C@@H]2N=C1C(C)C)C	CHEMBL1783520	60
o1nc(c2cc(OC)ccc12)CCC1CC[NH+](CC1)Cc1ccccc1	CHEMBL94186	7.24			[n+]1(ccc(N2CCCCC2)cc1)Cc1cc(ccc1)-c1cc(ccc1)C[n+]1ccc(N2CCCCC2)cc1	CHEMBL187404	60			[n+]1(ccc(N2CCCCC2)cc1)Cc1cc(ccc1)-c1cc(ccc1)C[n+]1ccc(N2CCCCC2)cc1	CHEMBL187404	60
O(CC[N+](CC)(CC)CC)c1ccc(cc1)C(=O)NCCCCCC(=O)NNc1c2CCCCc2[nH+]c2c1cccc2	CHEMBL1203985	7.61			s1cccc1C[NH+](CCCCCCNC1=CC(=O)C(NCCCCCC[NH+](Cc2sccc2)CC)=CC1=O)CC	CHEMBL390247	60.4			s1cccc1C[NH+](CCCCCCNC1=CC(=O)C(NCCCCCC[NH+](Cc2sccc2)CC)=CC1=O)CC	CHEMBL390247	60.4
O(C)c1ccccc1C[NH+](CCCCCCCNC1=CC(=O)C(NCCCCCCC[NH+](Cc2ccccc2OC)CC)=CC1=O)CC	CHEMBL243273	7.79			O(C)c1ccccc1C[NH+](CCNC1=CC(=O)C(NCC[NH+](Cc2ccccc2OC)CC)=CC1=O)CC	CHEMBL243270	61.5			O(C)c1ccccc1C[NH+](CCNC1=CC(=O)C(NCC[NH+](Cc2ccccc2OC)CC)=CC1=O)CC	CHEMBL243270	61.5
s1c2cc(OC)c(OC)cc2cc1C(=O)C1CCC[N+](CC1)(Cc1ccccc1)C	CHEMBL186144	8			O(C)c1cc2CCN(Cc2cc1OC)c1cc[n+](cc1)Cc1ccc(cc1)C[n+]1ccc(N2CCCCC2)cc1	CHEMBL1771556	62			O(C)c1cc2CCN(Cc2cc1OC)c1cc[n+](cc1)Cc1ccc(cc1)C[n+]1ccc(N2CCCCC2)cc1	CHEMBL1771556	62
O1c2c(cc(O)cc2)C(=O)C=C1C(=O)NCCCCCCCCCCNc1c2CCCCc2[nH+]c2c1cccc2	CHEMBL2019043	8			O=C(CCC1CC[NH+](CC1)Cc1ccccc1)c1cc2CCCNc2cc1	CHEMBL1083661	64.57			O=C(CCC1CC[NH+](CC1)Cc1ccccc1)c1cc2CCCNc2cc1	CHEMBL1083661	64.57
O(C)c1c(OC)cc(cc1OC)CCC(=O)NCCCCCC(=O)NNc1c2CCCCc2[nH+]c2c1cccc2	CHEMBL219264	8.39			O(C)C1=CC(=O)C(NCCCCCC[NH+](Cc2ccccc2OC)CC)=CC1=O	CHEMBL1940615	65.3			O(C)C1=CC(=O)C(NCCCCCC[NH+](Cc2ccccc2OC)CC)=CC1=O	CHEMBL1940615	65.3
Clc1cc2[nH+]c3c(C4CC(=CC(C4)C3)C)c(NCCN=[N+]=[N-])c2cc1	CHEMBL574973	8.69			O(CCC[NH+]1CCC(N2c3c(NC2=O)cccc3)CC1)c1ccc(cc1)C(=O)c1ccc(cc1)C[NH+](Cc1ccccc1)C	CHEMBL1773485	68			O(CCC[NH+]1CCC(N2c3c(NC2=O)cccc3)CC1)c1ccc(cc1)C(=O)c1ccc(cc1)C[NH+](Cc1ccccc1)C	CHEMBL1773485	68
Oc1cc(ccc1)C[NH+]1CCC(CC1)CCC(=O)c1cc2CCC(=O)n3c2c(c1)cc3	CHEMBL1651140	8.71			O1CC[NH+](CC1)CCCCCCNc1c2CCCCc2[nH+]c2c1cccc2	CHEMBL1819169	68.9			O1CC[NH+](CC1)CCCCCCNc1c2CCCCc2[nH+]c2c1cccc2	CHEMBL1819169	68.9
S1C[C@]2([C@H]3[C@@]4([C@]5([C@@H](CC3)[C@@]3(C[C@@H](O)[C@H]([C@@H]([NH+](Cc6ccc(OC)cc6)C)C)[C@]3(CC5=O)C)C)C4)CC[C@@H]2N=C1C(C)C)C	CHEMBL1783515	9			O(C)c1ccccc1C[NH+](CCCCCCN1CCN(CCCCCC[NH+](Cc2ccccc2OC)CC)C(=O)C1=O)CC	CHEMBL450990	68.9			O(C)c1ccccc1C[NH+](CCCCCCN1CCN(CCCCCC[NH+](Cc2ccccc2OC)CC)C(=O)C1=O)CC	CHEMBL450990	68.9
[NH+]1(CCC(CC1)CCCNc1nc(N)c(cc1C#N)C#N)Cc1ccccc1	CHEMBL2088785	9.4			S1C[C@]2([C@H]3[C@@]4([C@]5([C@@H](CC3)[C@@]3(C[C@@H](O)[C@H]([C@@H]([NH+](CCN6C(=O)c7c(cccc7)C6=O)C)C)[C@]3(CC5=O)C)C)C4)CC[C@@H]2N=C1C(C)C)C	CHEMBL1783519	70			S1C[C@]2([C@H]3[C@@]4([C@]5([C@@H](CC3)[C@@]3(C[C@@H](O)[C@H]([C@@H]([NH+](CCN6C(=O)c7c(cccc7)C6=O)C)C)[C@]3(CC5=O)C)C)C4)CC[C@@H]2N=C1C(C)C)C	CHEMBL1783519	70
O(C)c1ccccc1C[NH+](CCCCCCNC=1C(=O)C(C)=C(NCCCCCC[NH+](Cc2ccccc2OC)CC)C(=O)C=1C)CC	CHEMBL243269	9.5			O=C1C=C(NCCCCCC[NH+](Cc2ccccc2C)CC)C(=O)C=C1NCCCCCC[NH+](Cc1ccccc1C)CC	CHEMBL243274	71.9			O=C1C=C(NCCCCCC[NH+](Cc2ccccc2C)CC)C(=O)C=C1NCCCCCC[NH+](Cc1ccccc1C)CC	CHEMBL243274	71.9
Clc1cc2[nH+]c3c(CCCC3)c(NCCCCCNC(=O)CCc3cc4c(nc(c5CCCOc45)-c4ccccc4)cc3)c2cc1	CHEMBL540240	9.64			O(C)c1ccccc1C[NH+](CCCCCCN1CCN(CCCCCC[NH+](Cc2ccccc2OC)CC)C1=O)CC	CHEMBL449941	72.4			O(C)c1ccccc1C[NH+](CCCCCCN1CCN(CCCCCC[NH+](Cc2ccccc2OC)CC)C1=O)CC	CHEMBL449941	72.4
O=C1N2CCc3cc(cc(CC1)c23)C(=O)CCC1CC[NH+](CC1)Cc1ccccc1	CHEMBL1651130	9.77			Fc1ccc(cc1)C([NH+]1CC[NH+](CC1)Cc1ccc(cc1)-c1ccccc1C#N)c1ccc(F)cc1	CHEMBL209392	73.6			Fc1ccc(cc1)C([NH+]1CC[NH+](CC1)Cc1ccc(cc1)-c1ccccc1C#N)c1ccc(F)cc1	CHEMBL209392	73.6
S1C[C@]2([C@H]3[C@@]4([C@]5([C@@H](CC3)[C@@]3(C[C@@H](O)[C@H]([C@@H]([NH+](Cc6ccccc6C(F)(F)F)C)C)[C@]3(CC5=O)C)C)C4)CC[C@@H]2N=C1C(C)C)C	CHEMBL1783516	11			[NH+]1(CCC(CC1)CCN=C1NN=C2C(=C1)Cc1c2cccc1)Cc1ccccc1	CHEMBL1204162	74			[NH+]1(CCC(CC1)CCN=C1NN=C2C(=C1)Cc1c2cccc1)Cc1ccccc1	CHEMBL1204162	74
Clc1cc2[nH+]c3c(CCCC3)c(NCCCCCCNC(=O)CCc3cc4c(nc(c5CCCOc45)-c4ccccc4)cc3)c2cc1	CHEMBL553914	11.1			[n+]1(ccc(N2CCCCC2)cc1)Cc1ccc(cc1)C[n+]1ccc(N2CCCCC2)cc1	CHEMBL188821	75			[n+]1(ccc(N2CCCCC2)cc1)Cc1ccc(cc1)C[n+]1ccc(N2CCCCC2)cc1	CHEMBL188821	75
O=C(CCC1CC[NH+](CC1)Cc1ccccc1)c1cc2nc([nH]c2cc1)C	CHEMBL1084790	12.2			O(C)c1cc(OC)ccc1\C=N\[C@@]1/2CC(=C[C@@H](CC=3NC(=O)C=CC1=3)\C\2=C/C)C	CHEMBL593933	84			O(C)c1cc(OC)ccc1\C=N\[C@@]1/2CC(=C[C@@H](CC=3NC(=O)C=CC1=3)\C\2=C/C)C	CHEMBL593933	84
Clc1cc2[nH+]c3c(CCCC3)c(N)c2cc1	CHEMBL292314	13.2			[nH+]1c2c(CCCC2)c(NCC[NH+]2CC[NH+](CC2)CCCN(C)c2ccccc2)c2c1cccc2	CHEMBL2064470	84.8			[nH+]1c2c(CCCC2)c(NCC[NH+]2CC[NH+](CC2)CCCN(C)c2ccccc2)c2c1cccc2	CHEMBL2064470	84.8
O(C)c1ccccc1C[NH+](CCCCNC1=CC(=O)C(NCCCC[NH+](Cc2ccccc2OC)CC)=CC1=O)CC	CHEMBL243272	13.6			O=C1n2c3c(cc(cc3cc2)C(=O)CCC2CC[NH+](CC2)Cc2ccccc2[N+](=O)[O-])CC1	CHEMBL1651141	89.13			O=C1n2c3c(cc(cc3cc2)C(=O)CCC2CC[NH+](CC2)Cc2ccccc2[N+](=O)[O-])CC1	CHEMBL1651141	89.13
O(C)c1cc(ccc1)C[NH+](CCCCCCNC1=CC(=O)C(NCCCCCC[NH+](Cc2cc(OC)ccc2)CC)=CC1=O)CC	CHEMBL394865	13.8			O(C)c1c(OC)cc(cc1OC)C(=O)NCCC(=O)NNc1c2CCCCc2[nH+]c2c1cccc2	CHEMBL266045	89.2			O(C)c1c(OC)cc(cc1OC)C(=O)NCCC(=O)NNc1c2CCCCc2[nH+]c2c1cccc2	CHEMBL266045	89.2
[nH+]1c2c(CCCC2)c(NCCCCCCCNc2c3Cc4c(-c3[nH+]c3c2cccc3)cccc4)c2c1cccc2	CHEMBL1819175	13.9			S1SCCC1CCCCC(=O)NCCNc1c2CCCCc2[nH+]c2c1cccc2	CHEMBL192682	97			S1SCCC1CCCCC(=O)NCCNc1c2CCCCc2[nH+]c2c1cccc2	CHEMBL192682	97
S1C[C@]2([C@H]3[C@@]4([C@]5([C@@H](CC3)[C@@]3(C[C@@H](O)[C@H]([C@@H]([NH+](CCCN6C(=O)c7c(cccc7)C6=O)C)C)[C@]3(CC5=O)C)C)C4)CC[C@@H]2N=C1C(C)C)C	CHEMBL1783499	14			s1nc(c2c1cccc2)CCC1CC[NH+](CC1)Cc1ccccc1	CHEMBL328102	100			s1nc(c2c1cccc2)CCC1CC[NH+](CC1)Cc1ccccc1	CHEMBL328102	100
S(=O)(=O)(Nc1cc2onc(c2cc1)CCC1CC[NH+](CC1)Cc1ccccc1)C	CHEMBL1651246	14.13			Brc1cc(OC)c(OC)cc1C[NH+]1CC[NH+](CC1)C(c1ccc(F)cc1)c1ccc(F)cc1	CHEMBL209924	1012.9			FC(C(F)(F)F)(C(F)(F)F)C=1OC[C@]2([C@H]3[C@@]4([C@]5([C@@H](CC3)[C@@]3(C[C@@H](O)[C@H]([C@@H]([NH+](C)C)C)[C@]3(CC5=O)C)C)C4)CC[C@@H]2N=1)C	CHEMBL1783531	3003
O=C(N1CC[NH+](CC1)CCNc1c2CCCCc2[nH+]c2c1cccc2)CC[NH+](C)C1CCCCC1	CHEMBL2064464	14.9			Fc1ccc(cc1)C([NH+]1CC[NH+](CC1)CCC=1C(=O)C2C(=NC=1C)CCCC2)c1ccc(F)cc1	CHEMBL212111	1072.8			[NH+]1(CCC(Nc2nc(N)c(cc2C#N)C#N)CC1)Cc1ccccc1	CHEMBL2088783	3100
O=C1N2CCCc3cc(cc(CC1)c23)C(=O)CCC1CC[NH+](CC1)Cc1ccccc1	CHEMBL1651244	15.85			Clc1cc2[nH+]c3CC(CCc3c(N)c2cc1)CNC(=O)CCCCC1SSCC1	CHEMBL363391	1090			O=C1[C@]23[C@@H](CC[C@@H]4[C@@]2(CC[C@@H]2[NH+]=C(NC[C@]24C)C(C)C)C3)[C@@]2(C[C@@H](O)[C@H]([C@@H]([NH+](C)C)C)[C@]2(C1)C)C	CHEMBL238062	3108
O(C)c1ccccc1C[NH+](CCCCCCN1CC(=O)N(CC1=O)CCCCCC[NH+](Cc1ccccc1OC)CC)CC	CHEMBL449467	15.9			O(C)c1cc2c(cc1OC)C\C(=C/c1ccc(cc1)C[NH+](Cc1ccccc1)C)\C2=O	CHEMBL598632	1140			Fc1ccc(cc1)C([NH+]1CC[NH+](CC1)CCC=1C(=O)N2C(=NC=1C)C=CC=C2)c1ccc(F)cc1	CHEMBL209863	3203.7
[n+]1(ccc(cc1)C(C)(C)C)CCCCCCC[n+]1ccc(cc1)C(C)(C)C	CHEMBL1642976	16			O(CCC[NH+](CC)CC)c1cc2c(C\C(=C/c3ccc(cc3)C[NH+](Cc3ccccc3)C)\C2=O)cc1	CHEMBL599254	1320			S1c2c(N(c3c1cccc3)C(=O)C([NH+](CC)CC)C)cccc2	CHEMBL1782730	3370
O(C)c1cc(ccc1O)\C=N\[C@@]1/2CC(=C[C@@H](CC=3NC(=O)C=CC1=3)\C\2=C/C)C	CHEMBL604478	16			Fc1ccc(cc1)C([NH+]1CC[NH+](CC1)Cc1cc2OCOc2cc1C)c1ccc(F)cc1	CHEMBL212162	1341.7			[n+]1(ccc(cc1)C(C)(C)C)C\C=C\C[n+]1ccc(cc1)C(C)(C)C	CHEMBL1642983	3400
Clc1cc2[nH+]c3c(CCCC3)c(NCCCCNC(=O)CCc3cc4c(nc(c5CCCOc45)-c4ccccc4)cc3)c2cc1	CHEMBL540169	16.6			O(C)c1cc(ccc1OC)C(=O)c1ccc(cc1)C[NH+](Cc1ccccc1)CCO	CHEMBL511468	1410			O1c2c(ccc3c2cccc3)C(c2c1[nH+]c1c(CCCC1)c2N)c1cc(OC)c(OC)c(OC)c1	CHEMBL2206897	3510
O(C)c1c(OC)cc(cc1OC)C(=O)NCCCCC(=O)NNc1c2CCCCc2[nH+]c2c1cccc2	CHEMBL219550	17			O(CC[NH+](CC)CC)c1cc2c(C\C(=C/c3ccc(cc3)C[NH+](Cc3ccccc3)C)\C2=O)cc1	CHEMBL599253	1530			[n+]1(ccc(cc1)C(C)(C)C)CCCC[n+]1ccc(cc1)C(C)(C)C	CHEMBL1642973	3700
O(C)c1ccccc1CC[NH+](CCCCCCNC1=CC(=O)C(NCCCCCC[NH+](CCc2ccccc2OC)CC)=CC1=O)CC	CHEMBL394348	17.3			O1c2c(OC1)cc1c(c3[n+](cc4c(c3cc1)ccc(OC)c4OC)C)c2	CHEMBL258893	1540			O(C)c1ccccc1C[NH+](Cc1ccc(cc1)C(=O)c1cc(OC)c(OC)cc1)C	CHEMBL513236	3710
O1c2c(cccc2)C(=O)C=C1C(=O)NCCCCCCCCCCNc1c2CCCCc2[nH+]c2c1cccc2	CHEMBL2019030	17.5			Fc1cc(ccc1OC)C(=O)c1ccc(cc1)C[NH+](Cc1ccccc1)C	CHEMBL474837	1570			O=C1[C@H]2[C@@H](CC[C@@H]3C(=CC[C@@H]4[NH+]=C(NC[C@@]34C)[C@H](CC)C)C2)[C@@]2(C[C@@H](O)[C@H]([C@@H]([NH+](C)C)C)[C@]2(C1)C)C	CHEMBL235548	3832
O(C)c1c(OC)cc(cc1OC)C(=O)NCCCCCC(=O)NNc1c2CCCCc2[nH+]c2c1cccc2	CHEMBL434378	18.2			O(C)c1cc(ccc1OC)C(=O)c1ccc(cc1)C[NH+](Cc1cc(ccc1)C)C	CHEMBL471581	1650			O(CCCC[NH+](CC)CC)c1cc2c(cc1)C(=O)/C(/C2)=C/c1ccc(cc1)C[NH+](Cc1ccccc1)C	CHEMBL599252	3950
O1c2cc(OC)c(OC)cc2C=C(c2ccc(cc2)C[NH+](Cc2ccccc2)CC)C1=O	CHEMBL244416	18.3			O(C)c1c2c(ccc1OC)cc-1[n+](CCc3cc(OC)c(OC)cc-13)c2	CHEMBL2163795	1690			O(C)c1cc2c(CC(CC3CC[NH+](CC3)Cc3ccccc3)C2=O)cc1OC	CHEMBL502	4150
O(CCNc1c2CCCCc2[nH+]c2c1cccc2)CCOCCNc1c2CCCCc2[nH+]c2c1cccc2	CHEMBL235014	19.7			O(C)c1ccc(cc1)C(=O)c1ccc(cc1)C[NH+](Cc1ccccc1)C	CHEMBL514966	1820			Clc1cc(ccc1Cl)\C=C\C(=O)NCCOc1cc2OC(=O)C(=Cc2cc1)c1ccc(cc1)C[NH+](Cc1ccccc1)CC	CHEMBL270248	4230
S1C[C@]2([C@H]3[C@@]4([C@]5([C@@H](CC3)[C@@]3(C[C@@H](O)[C@H]([C@@H]([NH+](CCc6ccccc6)C)C)[C@]3(CC5=O)C)C)C4)CC[C@@H]2N=C1C(C)C)C	CHEMBL1783526	20			[n+]1(ccccc1)CCCCCCCCC[n+]1ccccc1	CHEMBL105742	2000			O(C)c1cc(ccc1OC)C(=O)c1ccc(cc1)C[NH+](Cc1cc([N+](=O)[O-])ccc1)C	CHEMBL490360	4270
Fc1ccc(cc1)C([NH+]1CC[NH+](CC1)CC[NH+]1CCCC1)c1ccc(F)cc1	CHEMBL427232	21			O(C[n+]1cc2c(cccc2)cc1)C[n+]1cc2c(cccc2)cc1	CHEMBL1669487	2000			Fc1cc(cc(F)c1)\C=C\C(=O)NCCOc1cc2OC(=O)C(=Cc2cc1)c1ccc(cc1)C[NH+](Cc1ccccc1)CC	CHEMBL271709	4570
O=C1NC2=C(C=C1)[C@@]/1(\N=C\c3ccc(cc3)C#N)CC(=C[C@@H](C2)\C\1=C/C)C	CHEMBL596236	22			Clc1cc2[nH+]c3c(CCCC3)c(NCCCCCNC(=O)CCCc3c4c([nH]c3)cccc4)c2cc1	CHEMBL225021	2000			o1c2[nH+]c3c(C4CC(=CC(C4)C3)C)c(N)c2c(C)c1C	CHEMBL574746	4780
O=C(CCC1CC[NH+](CC1)Cc1ccccc1)c1cc2c(CCC[NH2+]C2)cc1	CHEMBL1651126	22.91			O1C=C(C(=O)c2cc(OC)c(OC)cc12)c1cc(ccc1)C[NH+](Cc1ccccc1)C	CHEMBL245054	2020			Clc1cc(ccc1Cl)C1c2c(Oc3c1ccc1c3cccc1)[nH+]c1c(CCCC1)c2N	CHEMBL2206900	5070
[n+]1(ccc(cc1)C(C)(C)C)\C=C\1/CC=C2C(C\C(\C=C2)=C\[n+]2ccc(cc2)C(C)(C)C)=C/1	CHEMBL1642988	24			O(C)c1cc(ccc1OC)C(=O)c1ccc(cc1)\C=C\C[NH+](Cc1ccccc1)C	CHEMBL474836	2100			O(C)c1cc2c([nH+]c3c(C4CC(=CC(C4)C3)CC)c2N)cc1OC	CHEMBL573094	5100
O=C1NC2=C(C=C1)[C@@]/1(\N=C\C=C\c3ccccc3)CC(=C[C@@H](C2)\C\1=C/C)C	CHEMBL595114	24			O1c2c(cc(OC)c(OC)c2)C(=O)C=C1c1cc(ccc1)C[NH+](Cc1ccccc1)C	CHEMBL245055	2270			O1c2c(ccc3c2cccc3)C(c2c1[nH+]c1c(CCCC1)c2N)c1ccc([N+](=O)[O-])cc1	CHEMBL2206898	5740
O(CCC[NH+]1CCCCC1)c1ccc(cc1)C(=O)c1ccc(cc1)C[NH+](Cc1ccccc1)C	CHEMBL1773483	24			O1c2c(cc(OC)c(OC)c2)C(=O)c2c1cc(OCCCCCCC[NH+](Cc1ccccc1)C)cc2	CHEMBL224981	2320			O1c2c(ccc(OCCCC[NH+](Cc3ccccc3)C)c2)C(=O)c2c1cccc2	CHEMBL225611	6250
O=C1NC2=C(C=C1)[C@@]/1(\N=C\C(=C\c3ccccc3)\C)CC(=C[C@@H](C2)\C\1=C/C)C	CHEMBL594187	25			Clc1cc2[nH+]c3c(C4CC(=CC(C4)C3)C)c(NC(=O)CCl)c2cc1	CHEMBL576004	2510			[n+]1(cc2c(cccc2)cc1)C\C=C\C[n+]1cc2c(cccc2)cc1	CHEMBL1669489	7000
O=C1[C@]23[C@@H](CC[C@@H]4[C@@]2(CC[C@@H]2N=C(C=C[C@]24C)C(C)C)C3)[C@@]2(C[C@@H](O)[C@H]([C@@H]([NH+](C)C)C)[C@]2(C1)C)C	CHEMBL1783534	25			s1c2cc(OC)c(OC)cc2cc1C=1CC[N+](CC=1)(Cc1ccccc1)C	CHEMBL191729	2670			s1c2c([nH+]c3c(C4CC(=CC(C4)C3)C)c2N)nc1SCCC	CHEMBL574261	7690
O(CCC[NH+](CC)CC)c1ccc(cc1)C(=O)c1ccc(cc1)C[NH+](Cc1ccccc1)C	CHEMBL1773482	25			O1c2c(ccc(OCCC[NH+](Cc3ccccc3)C)c2)C(=O)c2c1cccc2	CHEMBL225610	2680			Fc1ccc(cc1)CNc1nc(ncc1)NC1CC[NH+](CC1)Cc1ccccc1	CHEMBL2047227	7700
O(CC)c1cc(ccc1O)\C=N\[C@@]1/2CC(=C[C@@H](CC=3NC(=O)C=CC1=3)\C\2=C/C)C	CHEMBL605303	25			Fc1cc(ccc1F)CCC(=O)NCCOc1cc2C=C(c3ccc(cc3)C[NH+](Cc3ccccc3)CC)C(Oc2cc1)=O	CHEMBL248922	2770			Clc1cc(ccc1)CNc1nc(ncc1)NC1CC[NH+](CC1)Cc1ccccc1	CHEMBL2047224	7700
O=C(CCC1CC[NH+](CC1)Cc1ccccc1)c1cc2CC[NH2+]CCc2cc1	CHEMBL1651127	25.12			O=C1C2=C(Nc3[nH+]c4c(CCCC4)c(N)c3C2c2ccncc2)CC(C1)(C)C	CHEMBL468002	2800			[n+]1(cc2c(cccc2)cc1)Cc1cc(ccc1)C[n+]1cc2c(cccc2)cc1	CHEMBL1669492	8000
O(C)c1ccccc1C[NH+](CCCCCC(=O)N1CCN(CC1)C(=O)CCCCC[NH+](Cc1ccccc1OC)CC)CC	CHEMBL502877	25.7			O(C)c1cc2c(cc1OC)CC[NH+](CCCCCCC#C)C2c1ccc([N+](=O)[O-])cc1	CHEMBL575167	2920			O(C)c1cc2c(cc1OC)CC[NH+](CCCCCCC#C)C2c1cc([N+](=O)[O-])ccc1	CHEMBL575810	8080
O(C)c1ccccc1C[NH+](CCCCCCNC1=CC(=O)c2ncccc2C1=O)CC	CHEMBL1940613	27.9			FC(C(F)(F)F)(C(F)(F)F)C=1OC[C@]2([C@H]3[C@@]4([C@]5([C@@H](CC3)[C@@]3(C[C@@H](O)[C@H]([C@@H]([NH+](C)C)C)[C@]3(CC5=O)C)C)C4)CC[C@@H]2N=1)C	CHEMBL1783531	3003			O(C)c1ccccc1C[NH+](CCCCCC(=O)NC1CCC(NC(=O)CCCCC[NH+](Cc2ccccc2OC)CC)CC1)CC	CHEMBL499722	8550
s1c2cc(OC)c(OC)cc2cc1C(=O)C1CCC[N+](CC1)(CC1OCCCC1)C	CHEMBL372491	28			[NH+]1(CCC(Nc2nc(N)c(cc2C#N)C#N)CC1)Cc1ccccc1	CHEMBL2088783	3100			O(C)c1cc(ccc1OC)C(=O)c1ccc(cc1)C[NH+](Cc1ccccc1)CC[NH+](C)C	CHEMBL492098	8640
O(C)c1cc(cc(OC)c1)\C=N\[C@@]1/2CC(=C[C@@H](CC=3NC(=O)C=CC1=3)\C\2=C/C)C	CHEMBL606348	29			O=C1[C@]23[C@@H](CC[C@@H]4[C@@]2(CC[C@@H]2[NH+]=C(NC[C@]24C)C(C)C)C3)[C@@]2(C[C@@H](O)[C@H]([C@@H]([NH+](C)C)C)[C@]2(C1)C)C	CHEMBL238062	3108			n1c(NCc2ccccc2)ccnc1N1CCCC1	CHEMBL1085780	8700
O(C)c1ccccc1C[NH+](CCCCCCNC1=CC(=O)C(C)=C(C)C1=O)CC	CHEMBL1940614	29			Fc1ccc(cc1)C([NH+]1CC[NH+](CC1)CCC=1C(=O)N2C(=NC=1C)C=CC=C2)c1ccc(F)cc1	CHEMBL209863	3203.7			O(C)c1ccccc1\C=C\1/CN(C\C(=C/c2ccccc2OC)\C/1=O)C(=O)C=C	CHEMBL2332539	8720
O=C(CCc1ccc([N+](CC=C)(C)C)cc1)CCc1ccc([N+](CC=C)(C)C)cc1	CHEMBL464538	30			S1c2c(N(c3c1cccc3)C(=O)C([NH+](CC)CC)C)cccc2	CHEMBL1782730	3370			[NH+]1(CCC(Nc2nc(N)c(C#N)c(-c3ccccc3)c2C#N)CC1)Cc1ccccc1	CHEMBL2088687	8800
S1c2cc(OC)c(OC)cc2CC1C(=O)CCc1cc[n+](cc1)CCOC	CHEMBL189774	30			[n+]1(ccc(cc1)C(C)(C)C)C\C=C\C[n+]1ccc(cc1)C(C)(C)C	CHEMBL1642983	3400			[n+]1(c2c(cccc2)ccc1)CCC[n+]1c2c(cccc2)ccc1	CHEMBL1761991	9000
O1CCOc2c1cc(cc2)C(=O)CCC1CC[NH+](CC1)Cc1ccccc1	CHEMBL1196495	30.2			O1c2c(ccc3c2cccc3)C(c2c1[nH+]c1c(CCCC1)c2N)c1cc(OC)c(OC)c(OC)c1	CHEMBL2206897	3510			O(C)c1cc2c([nH+]c3c(CCCC3)c2NCCC)cc1	CHEMBL1257996	9200
O=C1NC2=C(C=C1)[C@@]/1(\N=C\c3ccc(N(C)C)cc3)CC(=C[C@@H](C2)\C\1=C/C)C	CHEMBL595115	31			[n+]1(ccc(cc1)C(C)(C)C)CCCC[n+]1ccc(cc1)C(C)(C)C	CHEMBL1642973	3700			O=C/1/C(/CN(C\C\1=C/c1cc([N+](=O)[O-])ccc1)C(=O)C=C)=C/c1cc([N+](=O)[O-])ccc1	CHEMBL2332537	9760
O(C)c1ccc(cc1)\C=N\[C@@]1/2CC(=C[C@@H](CC=3NC(=O)C=CC1=3)\C\2=C/C)C	CHEMBL594870	31			O(C)c1ccccc1C[NH+](Cc1ccc(cc1)C(=O)c1cc(OC)c(OC)cc1)C	CHEMBL513236	3710			n1c(NCCc2ccccc2)ccnc1N1CCCC1	CHEMBL1082978	9800
O(CC=C)c1ccc(cc1)\C=N\[C@@]1/2CC(=C[C@@H](CC=3NC(=O)C=CC1=3)\C\2=C/C)C	CHEMBL606538	31			O=C1[C@H]2[C@@H](CC[C@@H]3C(=CC[C@@H]4[NH+]=C(NC[C@@]34C)[C@H](CC)C)C2)[C@@]2(C[C@@H](O)[C@H]([C@@H]([NH+](C)C)C)[C@]2(C1)C)C	CHEMBL235548	3832			Brc1ccc(cc1)CNc1nc(ncc1)NC1CC[NH+](CC1)Cc1ccccc1	CHEMBL2047226	9900
[n+]1(ccc(cc1)C(C)(C)C)CCCCCC[n+]1ccc(cc1)C(C)(C)C	CHEMBL1642975	32			O(CCCC[NH+](CC)CC)c1cc2c(cc1)C(=O)/C(/C2)=C/c1ccc(cc1)C[NH+](Cc1ccccc1)C	CHEMBL599252	3950			[n+]1(ccc(cc1)C(C)(C)C)Cc1ccccc1C[n+]1ccc(cc1)C(C)(C)C	CHEMBL1642985	10000
s1c2cc(OC)c(OC)cc2cc1C(=O)C1CCC[N+](CC1)(Cc1oc([N+](=O)[O-])cc1)C	CHEMBL610243	32			O(C)c1cc2c(CC(CC3CC[NH+](CC3)Cc3ccccc3)C2=O)cc1OC	CHEMBL502	4150			O(C)c1c(OC)cc(cc1OC)CNc1nc(ncc1)NC1CC[NH+](CC1)Cc1ccccc1	CHEMBL2047231	10300
S1SCCC1CCCCC(=O)NCCCCCCCNc1c2CCCCc2[nH+]c2c1cccc2	CHEMBL195067	32.7			Clc1cc(ccc1Cl)\C=C\C(=O)NCCOc1cc2OC(=O)C(=Cc2cc1)c1ccc(cc1)C[NH+](Cc1ccccc1)CC	CHEMBL270248	4230			O=C/1c2c(C\C\1=C/c1ccc(cc1)C[NH+](Cc1ccccc1)C)cccc2	CHEMBL597406	11700
O=C(CCC1CC[NH+](CC1)Cc1ccccc1)c1cc2NC(Nc2cc1)c1ccccc1	CHEMBL1651125	33.11			O(C)c1cc(ccc1OC)C(=O)c1ccc(cc1)C[NH+](Cc1cc([N+](=O)[O-])ccc1)C	CHEMBL490360	4270			Fc1ccccc1\C=C\1/CN(C\C(=C/c2ccccc2F)\C/1=O)C(=O)C=C	CHEMBL2332536	11810
S1SCCC1CCCCC(=O)NCCCCCNc1c2CCCCc2[nH+]c2c1cccc2	CHEMBL425739	38.4			Fc1cc(cc(F)c1)\C=C\C(=O)NCCOc1cc2OC(=O)C(=Cc2cc1)c1ccc(cc1)C[NH+](Cc1ccccc1)CC	CHEMBL271709	4570			Clc1ccccc1\C=C\1/CN(C\C(=C/c2ccccc2Cl)\C/1=O)C(=O)C[C@H]1C[C@@H]2[NH+](CCC2)[C@@]12c1c(NC2=O)cccc1	CHEMBL2332974	11920
[NH+]1(CCC(CC1)CCN=C1NN=C(C(=C1)C)c1ccccc1)Cc1ccccc1	CHEMBL1204299	39			o1c2[nH+]c3c(C4CC(=CC(C4)C3)C)c(N)c2c(C)c1C	CHEMBL574746	4780			O(C[n+]1ccc(cc1)C(C)(C)C)C[n+]1ccc(cc1)C(C)(C)C	CHEMBL1642981	12000
O1CC[NH2+]Cc2cc(ccc12)C(=O)CCC1CC[NH+](CC1)Cc1ccccc1	CHEMBL1651128	39.81			Clc1cc(ccc1Cl)C1c2c(Oc3c1ccc1c3cccc1)[nH+]c1c(CCCC1)c2N	CHEMBL2206900	5070			[n+]1(cc2c(cccc2)cc1)Cc1ccc(cc1)C[n+]1cc2c(cccc2)cc1	CHEMBL1669493	12000
S1c2cc(OC)c(OC)cc2CC1C(=O)CCc1cc[n+](cc1)CC1CCC1	CHEMBL365904	40			O(C)c1cc2c([nH+]c3c(C4CC(=CC(C4)C3)CC)c2N)cc1OC	CHEMBL573094	5100			O1c2cc(ccc2OC1)CNc1nc(ncc1)NC1CC[NH+](CC1)Cc1ccccc1	CHEMBL2047375	12600
O=C1NC2=C(C=C1)[C@@]/1(\N=C\C=C\c3ccc(N(C)C)cc3)CC(=C[C@@H](C2)\C\1=C/C)C	CHEMBL606372	40			O1c2c(ccc3c2cccc3)C(c2c1[nH+]c1c(CCCC1)c2N)c1ccc([N+](=O)[O-])cc1	CHEMBL2206898	5740			[n+]1(cc2c(cccc2)cc1)CCCCC[n+]1cc2c(cccc2)cc1	CHEMBL1669483	13000
[nH+]1c2c(CCCC2)c(NCC[NH+]2CC[NH+](CC2)CCC[NH+](C)C2CCCCC2)c2c1cccc2	CHEMBL2064468	40.7			O1c2c(ccc(OCCCC[NH+](Cc3ccccc3)C)c2)C(=O)c2c1cccc2	CHEMBL225611	6250			[n+]1(ccc(cc1)C(C)(C)C)CCC[n+]1ccc(cc1)C(C)(C)C	CHEMBL1642972	14000
O(C)c1c(OC)cc(cc1OC)CCC(=O)NCC(=O)NNc1c2CCCCc2[nH+]c2c1cccc2	CHEMBL445846	40.7			[n+]1(cc2c(cccc2)cc1)C\C=C\C[n+]1cc2c(cccc2)cc1	CHEMBL1669489	7000			Clc1cc2nc3c(C4CC(=CC(C4)C3)C)c(O)c2cc1	CHEMBL575166	14700
S(Oc1ccccc1\C=N\[C@@]1/2CC(=C[C@@H](CC=3NC(=O)C=CC1=3)\C\2=C/C)C)(=O)(=O)[O-]	CHEMBL596457	41			s1c2c([nH+]c3c(C4CC(=CC(C4)C3)C)c2N)nc1SCCC	CHEMBL574261	7690			O(C)c1cc2c([nH+]c3c(CCCC3)c2N)cc1	CHEMBL1256415	15000
O(C)c1ccccc1C[NH+](CCCCCCNc1ccc(NCCCCCC[NH+](Cc2ccccc2OC)CC)cc1)CC	CHEMBL230434	42.5			Fc1ccc(cc1)CNc1nc(ncc1)NC1CC[NH+](CC1)Cc1ccccc1	CHEMBL2047227	7700			Brc1cc2c([nH]cc2CC(=O)NCCCCCCCNc2c3CCCCc3[nH+]c3c2ccc(Cl)c3)cc1	CHEMBL225326	15000
O=C1n2c3c(cc(cc3cc2)C(=O)CCC2CC[NH+](CC2)Cc2ccc([N+](=O)[O-])cc2)CC1	CHEMBL1651250	42.66			Clc1cc(ccc1)CNc1nc(ncc1)NC1CC[NH+](CC1)Cc1ccccc1	CHEMBL2047224	7700			Clc1cc(Cl)ccc1\C=C\1/CN(C\C(=C/c2ccc(Cl)cc2Cl)\C/1=O)C(=O)C=C	CHEMBL2332546	15750
s1c2cc(OC)c(OC)cc2cc1C(=O)C1CC[N+](CCC1O)(Cc1ccccc1)C	CHEMBL361869	43			[n+]1(cc2c(cccc2)cc1)Cc1cc(ccc1)C[n+]1cc2c(cccc2)cc1	CHEMBL1669492	8000			[n+]1(ccc(cc1)C(C)(C)C)CC[n+]1ccc(cc1)C(C)(C)C	CHEMBL1642971	17000
S1C[C@]2([C@H]3[C@@]4([C@]5([C@@H](CC3)[C@@]3(C[C@@H](O)[C@H]([C@@H](N(C(=O)c6ccccc6)C)C)[C@]3(CC5=O)C)C)C4)CC[C@@H]2N=C1C(C)C)C	CHEMBL1783523	43			O(C)c1cc2c(cc1OC)CC[NH+](CCCCCCC#C)C2c1cc([N+](=O)[O-])ccc1	CHEMBL575810	8080			O(C)c1ccccc1C[NH+]1CCC([NH+]2CCC(NC3=CC(=O)c4c(cccc4)C3=O)CC2)CC1	CHEMBL1940618	17200
O1c2cc(OC)c(OC)cc2C=C(NC(=O)[C@@H]2C[C@H]([NH2+]Cc3ccccc3)CCC2)C1=O	CHEMBL2314726	43			O(C)c1ccccc1C[NH+](CCCCCC(=O)NC1CCC(NC(=O)CCCCC[NH+](Cc2ccccc2OC)CC)CC1)CC	CHEMBL499722	8550			o1c2c(cccc2)c(C(=O)C)c1-c1ccc(OCCCCCCC[NH+](Cc2ccccc2)C)cc1	CHEMBL511948	17400
Clc1cc2[nH+]c3c(C4CC(=CC(C4)C3)C)c(NCCCl)c2cc1	CHEMBL576385	43.3			O(C)c1cc(ccc1OC)C(=O)c1ccc(cc1)C[NH+](Cc1ccccc1)CC[NH+](C)C	CHEMBL492098	8640			O=C/1/C(/CN(C\C\1=C/c1ccc(cc1)C)C(=O)C=C)=C/c1ccc(cc1)C	CHEMBL454594	18060
O1CC[NH+](CC1)CCCCCCCNc1c2CCCCc2[nH+]c2c1cccc2	CHEMBL1819170	44.5			n1c(NCc2ccccc2)ccnc1N1CCCC1	CHEMBL1085780	8700			O1c2c(cc(OC)cc2)C(=O)C=C1c1ccc(cc1)C[NH+](Cc1ccccc1)C	CHEMBL241828	18100
O1c2cc(OC)c(OC)cc2C=C(c2ccc(cc2)C[NH+](Cc2ccccc2)CCO)C1=O	CHEMBL396247	49.3			O(C)c1ccccc1\C=C\1/CN(C\C(=C/c2ccccc2OC)\C/1=O)C(=O)C=C	CHEMBL2332539	8720			O(CC[n+]1ccc(cc1)C(C)(C)C)CC[n+]1ccc(cc1)C(C)(C)C	CHEMBL1642982	19000
S1(=O)(=O)N(CCCCCCCC[NH+]2Cc3c4[C@]5([C@@H](Oc4c(OC)cc3)C[C@@H](O)C=C5)CC2)C(=O)c2c1cccc2	CHEMBL1794936	50			[NH+]1(CCC(Nc2nc(N)c(C#N)c(-c3ccccc3)c2C#N)CC1)Cc1ccccc1	CHEMBL2088687	8800			s1c2cc(OC)c(OC)cc2cc1C1CC[N+](CC1O)(Cc1ccccc1)C	CHEMBL187812	19580
Brc1cc2onc(c2cc1)CCC1CC[NH+](CC1)Cc1ccccc1	CHEMBL330004	50.12			[n+]1(c2c(cccc2)ccc1)CCC[n+]1c2c(cccc2)ccc1	CHEMBL1761991	9000			O=C(c1ccc(cc1)C[NH+](Cc1ccccc1)C)c1cc2c(cc1)cccc2	CHEMBL491562	19600
O=C1NC2=C(C=C1)[C@@]/1(\N=C\C(=C\c3ccccc3)\CCCCC)CC(=C[C@@H](C2)\C\1=C/C)C	CHEMBL594186	51			O(C)c1cc2c([nH+]c3c(CCCC3)c2NCCC)cc1	CHEMBL1257996	9200			[n+]1(ccc(cc1)C(C)(C)C)C[n+]1ccc(cc1)C(C)(C)C	CHEMBL1642970	20000
O(C)c1c(OC)cc(cc1OC)C(=O)NCC(=O)NNc1c2CCCCc2[nH+]c2c1cccc2	CHEMBL385269	51.6			O=C/1/C(/CN(C\C\1=C/c1cc([N+](=O)[O-])ccc1)C(=O)C=C)=C/c1cc([N+](=O)[O-])ccc1	CHEMBL2332537	9760			Clc1ccc(cc1)C[NH+]1CCN(CC1)c1nc(NCc2ccccc2)ccn1	CHEMBL1766142	20200
O=C(N1CC[NH+](CC1)CCNc1c2CCCCc2[nH+]c2c1cccc2)CC[NH+]1CCCCC1	CHEMBL2064404	51.7			n1c(NCCc2ccccc2)ccnc1N1CCCC1	CHEMBL1082978	9800			Fc1ccc(cc1)C[NH+]1CCN(CC1)c1nc(NCc2ccccc2)ccn1	CHEMBL1766144	21600
O(C)c1ccc(cc1)C[NH+](CCCCCCNC1=CC(=O)C(NCCCCCC[NH+](Cc2ccc(OC)cc2)CC)=CC1=O)CC	CHEMBL242661	52			Brc1ccc(cc1)CNc1nc(ncc1)NC1CC[NH+](CC1)Cc1ccccc1	CHEMBL2047226	9900			OCC[NH+]1CCN(CC1)c1nc(NC(c2ccccc2)c2ccccc2)ccn1	CHEMBL1834078	21600
O(CCCCC[NH+]1CCCCC1)c1cc2c(cc1)C(=O)/C(/CC2)=C/c1ccc(cc1)C[NH+](Cc1ccccc1)C	CHEMBL599644	52			[n+]1(ccc(cc1)C(C)(C)C)Cc1ccccc1C[n+]1ccc(cc1)C(C)(C)C	CHEMBL1642985	10000			Clc1c2C3CC(=CC(C3)Cc2nc2c1ccc(Cl)c2)C	CHEMBL572865	22400
O=C(CCC1CC[NH+](CC1)Cc1ccccc1)c1cc2CCNc2cc1	CHEMBL75110	52.48			O(C)c1c(OC)cc(cc1OC)CNc1nc(ncc1)NC1CC[NH+](CC1)Cc1ccccc1	CHEMBL2047231	10300			[NH+]1(CCN(CC1)c1nc(NCc2ccccc2)ccn1)C1CCCCC1	CHEMBL1766018	22900
O=C1N2CCc3cc(cc(CCC1)c23)C(=O)CCC1CC[NH+](CC1)Cc1ccccc1	CHEMBL1651245	52.48			O=C/1c2c(C\C\1=C/c1ccc(cc1)C[NH+](Cc1ccccc1)C)cccc2	CHEMBL597406	11700			Fc1ccccc1\C=C\1/CN(C[C@@]2(C[C@@H]3[NH+](CCC3)[C@]23c2c(NC3=O)cccc2)C/1=O)C(=O)C[C@H]1C[C@@H]2[NH+](CCC2)[C@@]12c1c(NC2=O)cccc1	CHEMBL2332533	24580
s1c2cc(OC)c(OC)cc2cc1C(=O)C1CCC[N+](CC1)(CCOC)C	CHEMBL364125	53			Fc1ccccc1\C=C\1/CN(C\C(=C/c2ccccc2F)\C/1=O)C(=O)C=C	CHEMBL2332536	11810			O1c2cc(OC)c(OC)cc2C=C(c2ccc(cc2)C[NH+](Cc2ccc([N+](=O)[O-])cc2)C)C1=O	CHEMBL242906	24600
O(CCCCC[NH+](CC)CC)c1cc2c(cc1)C(=O)/C(/CC2)=C/c1ccc(cc1)C[NH+](Cc1ccccc1)C	CHEMBL597188	56			Clc1ccccc1\C=C\1/CN(C\C(=C/c2ccccc2Cl)\C/1=O)C(=O)C[C@H]1C[C@@H]2[NH+](CCC2)[C@@]12c1c(NC2=O)cccc1	CHEMBL2332974	11920			Clc1cc(Cl)ccc1-n1nc(C(=O)NN2CCCCC2)c(C)c1-c1ccc(Cl)cc1	CHEMBL558598	25118.9
O(C)c1c(OC)cc(cc1OC)CCC(=O)NCCCCC(=O)NNc1c2CCCCc2[nH+]c2c1cccc2	CHEMBL219316	59			O(C[n+]1ccc(cc1)C(C)(C)C)C[n+]1ccc(cc1)C(C)(C)C	CHEMBL1642981	12000			S1SCCC1CCCCC(=O)NCCCOc1cc(ccc1)C([NH+](C)C)C	CHEMBL1912064	25200
[n+]1(ccc(N2CCCCC2)cc1)Cc1cc(ccc1)-c1cc(ccc1)C[n+]1ccc(N2CCCCC2)cc1	CHEMBL187404	60			[n+]1(cc2c(cccc2)cc1)Cc1ccc(cc1)C[n+]1cc2c(cccc2)cc1	CHEMBL1669493	12000			Brc1ccc(cc1)C[NH+]1CCN(CC1)c1nc(NCc2ccccc2)ccn1	CHEMBL1766143	25500
S1C[C@]2([C@H]3[C@@]4([C@]5([C@@H](CC3)[C@@]3(C[C@@H](O)[C@H]([C@@H]([NH+](C)C)C)[C@]3(CC5=O)C)C)C4)CC[C@@H]2N=C1C(C)C)C	CHEMBL1783520	60			O1c2cc(ccc2OC1)CNc1nc(ncc1)NC1CC[NH+](CC1)Cc1ccccc1	CHEMBL2047375	12600			S1CCN(CC1)c1nc(NCCc2ccccc2)ccn1	CHEMBL1082979	26400
s1cccc1C[NH+](CCCCCCNC1=CC(=O)C(NCCCCCC[NH+](Cc2sccc2)CC)=CC1=O)CC	CHEMBL390247	60.4			[n+]1(cc2c(cccc2)cc1)CCCCC[n+]1cc2c(cccc2)cc1	CHEMBL1669483	13000			o1c2[nH+]c3c(C4CC(=CC(C4)C3)C)c(N)c2nc1C1CCC1	CHEMBL576189	27100
O(C)c1ccccc1C[NH+](CCNC1=CC(=O)C(NCC[NH+](Cc2ccccc2OC)CC)=CC1=O)CC	CHEMBL243270	61.5			[n+]1(ccc(cc1)C(C)(C)C)CCC[n+]1ccc(cc1)C(C)(C)C	CHEMBL1642972	14000			O(C)c1cc(ccc1OC)C(=O)c1ccc(cc1)C[NH+](CC#C)C	CHEMBL491527	27200
O(C)c1cc2CCN(Cc2cc1OC)c1cc[n+](cc1)Cc1ccc(cc1)C[n+]1ccc(N2CCCCC2)cc1	CHEMBL1771556	62			Clc1cc2nc3c(C4CC(=CC(C4)C3)C)c(O)c2cc1	CHEMBL575166	14700			FC(F)(F)c1ccc(cc1)C[NH+]1CCN(CC1)c1nc(NCc2ccccc2)ccn1	CHEMBL1766145	28800
O1c2cc(OC)c(OC)cc2C=C(c2ccc(cc2)C[NH+](Cc2ccccc2OC)C)C1=O	CHEMBL389825	63			O(C)c1cc2c([nH+]c3c(CCCC3)c2N)cc1	CHEMBL1256415	15000			O=C(N1CCN(CC1)c1nc(NC(c2ccccc2)c2ccccc2)ccn1)C	CHEMBL1834075	29000
O=C(CCC1CC[NH+](CC1)Cc1ccccc1)c1cc2CCCNc2cc1	CHEMBL1083661	64.57			Brc1cc2c([nH]cc2CC(=O)NCCCCCCCNc2c3CCCCc3[nH+]c3c2ccc(Cl)c3)cc1	CHEMBL225326	15000			S1c2cc(OC)c(OC)cc2CC1CC1CC[N+](CC1)(Cc1ccccc1)C	CHEMBL187591	30000
O(C)c1ccccc1C[NH+]1CCC(CC1)CCC(=O)c1cc2CCC(=O)n3c2c(c1)cc3	CHEMBL1651136	64.57			Clc1cc(Cl)ccc1\C=C\1/CN(C\C(=C/c2ccc(Cl)cc2Cl)\C/1=O)C(=O)C=C	CHEMBL2332546	15750			O1c2c(cc(OC)c(OC)c2)C(=O)c2c1cc(cc2)C[NH+](Cc1ccccc1)C	CHEMBL244837	30300
O(C)C1=CC(=O)C(NCCCCCC[NH+](Cc2ccccc2OC)CC)=CC1=O	CHEMBL1940615	65.3			[n+]1(ccc(cc1)C(C)(C)C)CC[n+]1ccc(cc1)C(C)(C)C	CHEMBL1642971	17000			n1c(NC(c2ccccc2)c2ccccc2)ccnc1N1CCC(CC1)C	CHEMBL1834070	32200
[NH+]1(CCC(CC1)CCN=C1NN=C(C(=C1)CC)c1ccccc1)Cc1ccccc1	CHEMBL1204296	66			O(C)c1ccccc1C[NH+]1CCC([NH+]2CCC(NC3=CC(=O)c4c(cccc4)C3=O)CC2)CC1	CHEMBL1940618	17200			o1c2c(cc1-c1ccc(OCCCCCCC[NH+](Cc3ccccc3)C)cc1)cccc2	CHEMBL497755	32600
O(CCC[NH+]1CCC(N2c3c(NC2=O)cccc3)CC1)c1ccc(cc1)C(=O)c1ccc(cc1)C[NH+](Cc1ccccc1)C	CHEMBL1773485	68			o1c2c(cccc2)c(C(=O)C)c1-c1ccc(OCCCCCCC[NH+](Cc2ccccc2)C)cc1	CHEMBL511948	17400			O(CC[n+]1c2c(cccc2)ccc1)CC[n+]1c2c(cccc2)ccc1	CHEMBL1761997	35000
O1CC[NH+](CC1)CCCCCCNc1c2CCCCc2[nH+]c2c1cccc2	CHEMBL1819169	68.9			O=C/1/C(/CN(C\C\1=C/c1ccc(cc1)C)C(=O)C=C)=C/c1ccc(cc1)C	CHEMBL454594	18060			[n+]1(c2c(cccc2)ccc1)Cc1ccccc1C[n+]1c2c(cccc2)ccc1	CHEMBL1762000	35000
O(C)c1ccccc1C[NH+](CCCCCCN1CCN(CCCCCC[NH+](Cc2ccccc2OC)CC)C(=O)C1=O)CC	CHEMBL450990	68.9			O1c2c(cc(OC)cc2)C(=O)C=C1c1ccc(cc1)C[NH+](Cc1ccccc1)C	CHEMBL241828	18100			[n+]1(cc2c(cccc2)cc1)CCCC[n+]1cc2c(cccc2)cc1	CHEMBL1669482	36000
[NH+]1(CCC(CC1)CCCCNc1nc(N)c(cc1C#N)C#N)Cc1ccccc1	CHEMBL2088786	70			O(CC[n+]1ccc(cc1)C(C)(C)C)CC[n+]1ccc(cc1)C(C)(C)C	CHEMBL1642982	19000			o1c2c(cccc2)c(C(=O)c2ccc(OCC[NH+]3CCOCC3)cc2)c1-c1ccc(OCCCCCCC[NH+](Cc2ccccc2)C)cc1	CHEMBL2160225	39000
S1C[C@]2([C@H]3[C@@]4([C@]5([C@@H](CC3)[C@@]3(C[C@@H](O)[C@H]([C@@H]([NH+](CCN6C(=O)c7c(cccc7)C6=O)C)C)[C@]3(CC5=O)C)C)C4)CC[C@@H]2N=C1C(C)C)C	CHEMBL1783519	70			s1c2cc(OC)c(OC)cc2cc1C1CC[N+](CC1O)(Cc1ccccc1)C	CHEMBL187812	19580			[nH+]1c2c(CCCC2)c(N)c2cc(n(c12)-c1ccccc1)-c1ccccc1	CHEMBL1916768	45500
O=C(N1CC[NH+](CC1)CCNc1c2CCCCc2[nH+]c2c1cccc2)CCN(C)c1ccccc1	CHEMBL2064466	70.3			O=C(c1ccc(cc1)C[NH+](Cc1ccccc1)C)c1cc2c(cc1)cccc2	CHEMBL491562	19600			[NH+]1(CCc2c(C1)cccc2)CCCCCNc1nnc(cc1)-c1ccccc1	CHEMBL543711	47000
O=C1C=C(NCCCCCC[NH+](Cc2ccccc2C)CC)C(=O)C=C1NCCCCCC[NH+](Cc1ccccc1C)CC	CHEMBL243274	71.9			[n+]1(ccc(cc1)C(C)(C)C)C[n+]1ccc(cc1)C(C)(C)C	CHEMBL1642970	20000			[nH+]1c2c(C3CC(=CC(C3)C2)C)c(N)c2cn[nH]c12	CHEMBL574948	50000
O(C)c1ccccc1C[NH+](CCCCCCN1CCN(CCCCCC[NH+](Cc2ccccc2OC)CC)C1=O)CC	CHEMBL449941	72.4			Clc1ccc(cc1)C[NH+]1CCN(CC1)c1nc(NCc2ccccc2)ccn1	CHEMBL1766142	20200			S(C)c1n[nH]c2[nH+]c3c(C4CC(=CC(C4)C3)C)c(N)c12	CHEMBL572858	50000
O(C)c1c(OC)cc(cc1OC)CCC(=O)NCCCC(=O)NNc1c2CCCCc2[nH+]c2c1cccc2	CHEMBL384886	73			Fc1ccc(cc1)C[NH+]1CCN(CC1)c1nc(NCc2ccccc2)ccn1	CHEMBL1766144	21600
O=C1C=C(NCCCCCC[NH+](Cc2ccccc2)CC)C(=O)C=C1NCCCCCC[NH+](Cc1ccccc1)CC	CHEMBL218443	73.3			OCC[NH+]1CCN(CC1)c1nc(NC(c2ccccc2)c2ccccc2)ccn1	CHEMBL1834078	21600
Fc1ccc(cc1)C([NH+]1CC[NH+](CC1)Cc1ccc(cc1)-c1ccccc1C#N)c1ccc(F)cc1	CHEMBL209392	73.6			Clc1c2C3CC(=CC(C3)Cc2nc2c1ccc(Cl)c2)C	CHEMBL572865	22400
[NH+]1(CCC(CC1)CCN=C1NN=C2C(=C1)Cc1c2cccc1)Cc1ccccc1	CHEMBL1204162	74			[NH+]1(CCN(CC1)c1nc(NCc2ccccc2)ccn1)C1CCCCC1	CHEMBL1766018	22900
[n+]1(ccc(N2CCCCC2)cc1)Cc1ccc(cc1)C[n+]1ccc(N2CCCCC2)cc1	CHEMBL188821	75			Fc1ccccc1\C=C\1/CN(C[C@@]2(C[C@@H]3[NH+](CCC3)[C@]23c2c(NC3=O)cccc2)C/1=O)C(=O)C[C@H]1C[C@@H]2[NH+](CCC2)[C@@]12c1c(NC2=O)cccc1	CHEMBL2332533	24580
S1C[C@]2([C@H]3[C@@]4([C@]5([C@@H](CC3)[C@@]3(C[C@@H](O)[C@H]([C@@H]([NH+](CCCc6ccccc6)C)C)[C@]3(CC5=O)C)C)C4)CC[C@@H]2N=C1C(C)C)C	CHEMBL1783527	76			O1c2cc(OC)c(OC)cc2C=C(c2ccc(cc2)C[NH+](Cc2ccc([N+](=O)[O-])cc2)C)C1=O	CHEMBL242906	24600
O(C)c1ccccc1C[NH+](CCCCCCNC1=CC(=O)C(NCCCCCC[NH+](Cc2ccccc2OC)C)=CC1=O)C	CHEMBL242191	77.8			Clc1cc(Cl)ccc1-n1nc(C(=O)NN2CCCCC2)c(C)c1-c1ccc(Cl)cc1	CHEMBL558598	25118.9
O(C)c1cc(OC)ccc1\C=N\[C@@]1/2CC(=C[C@@H](CC=3NC(=O)C=CC1=3)\C\2=C/C)C	CHEMBL593933	84			S1SCCC1CCCCC(=O)NCCCOc1cc(ccc1)C([NH+](C)C)C	CHEMBL1912064	25200
[nH+]1c2c(CCCC2)c(NCC[NH+]2CC[NH+](CC2)CCCN(C)c2ccccc2)c2c1cccc2	CHEMBL2064470	84.8			Brc1ccc(cc1)C[NH+]1CCN(CC1)c1nc(NCc2ccccc2)ccn1	CHEMBL1766143	25500
O=C1n2c3c(cc(cc3cc2)C(=O)CCC2CC[NH+](CC2)Cc2ccccc2[N+](=O)[O-])CC1	CHEMBL1651141	89.13			S1CCN(CC1)c1nc(NCCc2ccccc2)ccn1	CHEMBL1082979	26400
O(C)c1c(OC)cc(cc1OC)C(=O)NCCC(=O)NNc1c2CCCCc2[nH+]c2c1cccc2	CHEMBL266045	89.2			o1c2[nH+]c3c(C4CC(=CC(C4)C3)C)c(N)c2nc1C1CCC1	CHEMBL576189	27100
S1c2cc(OC)c(OC)cc2CC1C(=O)CC1(O)CC[N+](CC1)(Cc1ccccc1)C	CHEMBL360832	90			O(C)c1cc(ccc1OC)C(=O)c1ccc(cc1)C[NH+](CC#C)C	CHEMBL491527	27200
S1SCCC1CCCCC(=O)NCCNc1c2CCCCc2[nH+]c2c1cccc2	CHEMBL192682	97			FC(F)(F)c1ccc(cc1)C[NH+]1CCN(CC1)c1nc(NCc2ccccc2)ccn1	CHEMBL1766145	28800
s1nc(c2c1cccc2)CCC1CC[NH+](CC1)Cc1ccccc1	CHEMBL328102	100			O=C(N1CCN(CC1)c1nc(NC(c2ccccc2)c2ccccc2)ccn1)C	CHEMBL1834075	29000
O(C)c1cc2c([nH+]c3c(CCCC3)c2NCCCCCC)cc1	CHEMBL1257885	100			S1c2cc(OC)c(OC)cc2CC1CC1CC[N+](CC1)(Cc1ccccc1)C	CHEMBL187591	30000
S1SCCC1CCCCC(=O)NCCCCCCNC1=CC(=O)C(NCCCCCC[NH+](Cc2ccccc2OC)CC)=CC1=O	CHEMBL572480	100			O1c2c(cc(OC)c(OC)c2)C(=O)c2c1cc(cc2)C[NH+](Cc1ccccc1)C	CHEMBL244837	30300
O1CC[NH+](CC1)CCCOc1ccc(cc1)C(=O)c1ccc(cc1)C[NH+](Cc1ccccc1)C	CHEMBL1773484	107			n1c(NC(c2ccccc2)c2ccccc2)ccnc1N1CCC(CC1)C	CHEMBL1834070	32200
O(C)c1cc2c(cc1)C(=O)/C(/CC2)=C/c1ccc(cc1)C[NH+](Cc1ccccc1)C	CHEMBL597794	110			o1c2c(cc1-c1ccc(OCCCCCCC[NH+](Cc3ccccc3)C)cc1)cccc2	CHEMBL497755	32600
S1c2cc(OC)c(OC)cc2CC1C(=O)CCc1cc[n+](cc1)CC1CC1	CHEMBL189517	110			O(CC[n+]1c2c(cccc2)ccc1)CC[n+]1c2c(cccc2)ccc1	CHEMBL1761997	35000
s1c2cc(OC)c(OC)cc2cc1C(=O)CC1CCCC[N+](CC1)(Cc1ccccc1)C	CHEMBL362711	110			[n+]1(c2c(cccc2)ccc1)Cc1ccccc1C[n+]1c2c(cccc2)ccc1	CHEMBL1762000	35000
O(CCCCCCC[NH+]1CCCCC1)c1ccc(cc1)C(=O)c1ccc(cc1)C[NH+](Cc1ccccc1)C	CHEMBL1773491	110			[n+]1(cc2c(cccc2)cc1)CCCC[n+]1cc2c(cccc2)cc1	CHEMBL1669482	36000
[NH+]1(CCC(CC1)CCNc1nnc-2c(c1)CCCc1c-2cccc1)Cc1ccccc1	CHEMBL1202865	120			o1c2c(cccc2)c(C(=O)c2ccc(OCC[NH+]3CCOCC3)cc2)c1-c1ccc(OCCCCCCC[NH+](Cc2ccccc2)C)cc1	CHEMBL2160225	39000
s1c2cc(OC)c(OC)cc2cc1C(=O)C1CC[N+](CCC1OC)(Cc1ccccc1)C	CHEMBL185976	120			[nH+]1c2c(CCCC2)c(N)c2cc(n(c12)-c1ccccc1)-c1ccccc1	CHEMBL1916768	45500
[NH+]1(CCC(CC1)CCCCNc1nc(N)c(C#N)c(-c2ccccc2)c1C#N)Cc1ccccc1	CHEMBL2088782	120			[NH+]1(CCc2c(C1)cccc2)CCCCCNc1nnc(cc1)-c1ccccc1	CHEMBL543711	47000
[NH+]1(CCC(CC1)CCc1n[nH]c2c1cccc2)Cc1ccccc1	CHEMBL92958	120.23			[nH+]1c2c(C3CC(=CC(C3)C2)C)c(N)c2cn[nH]c12	CHEMBL574948	50000
O1c2cc(OC)c(OC)cc2C=C(c2ccc(cc2)C[NH+](Cc2cc(ccc2)C)C)C1=O	CHEMBL427865	122			S(C)c1n[nH]c2[nH+]c3c(C4CC(=CC(C4)C3)C)c(N)c12	CHEMBL572858	50000
O=C1C=C(NCCCCCC[NH+](Cc2ncccc2)CC)C(=O)C=C1NCCCCCC[NH+](Cc1ncccc1)CC	CHEMBL244762	125
O(C)c1cc(ccc1)C[NH+]1CCC(CC1)CCC(=O)c1cc2CCC(=O)n3c2c(c1)cc3	CHEMBL1651137	125.89
Fc1ccc(cc1)C([NH+]1CC[NH+](CC1)CC[NH+]1CCCCC1)c1ccc(F)cc1	CHEMBL211520	126.3
O(c1ccc(cc1)C(=O)c1ccc(cc1)C[NH+](Cc1ccccc1)C)c1ccc(cc1)CC[NH+](CC)CC	CHEMBL1773492	130
O=C1C=C(NCCCCCC[NH+](Cc2cccnc2)CC)C(=O)C=C1NCCCCCC[NH+](Cc1cccnc1)CC	CHEMBL241974	133
O(C)c1c(OC)cc(cc1OC)CCC(=O)NCCC(=O)NNc1c2CCCCc2[nH+]c2c1cccc2	CHEMBL220141	135
[NH+]1(CCC(CC1)CCNc1nnc(cc1)-c1ccccc1)Cc1ccccc1	CHEMBL545587	140
O(CCCCC[NH+]1CCCCC1)c1ccc(cc1)C(=O)c1ccc(cc1)C[NH+](Cc1ccccc1)C	CHEMBL1773487	143
O(CCCCC[NH+](CC)CC)c1ccc(cc1)C(=O)c1ccc(cc1)C[NH+](Cc1ccccc1)C	CHEMBL1773486	144
o1cccc1C[NH+](CCCCCCNC1=CC(=O)C(NCCCCCC[NH+](Cc2occc2)CC)=CC1=O)CC	CHEMBL276444	144
O1c2c(C=C(c3ccc(cc3)C[NH+](Cc3ccccc3)C)C1=O)cc([N+](=O)[O-])cc2	CHEMBL244619	148
S1SCCC1CCCCC(=O)NCCCNC1=CC(=O)C(NCCCCCC[NH+](Cc2ccccc2OC)CC)=CC1=O	CHEMBL572532	150
Clc1ccc(cc1)C[NH+]1CCC(CC1)CCC(=O)c1cc2CCC(=O)n3c2c(c1)cc3	CHEMBL1651135	151.36
S1SCCC1CCCCC(=O)NCCCCCCNC1=CC(=O)C(NCCC[NH+](Cc2ccccc2OC)CC)=CC1=O	CHEMBL572453	160
O1c2c(C=C(c3ccc(cc3)C[NH+](Cc3ccccc3)C)C1=O)cc(OC)cc2	CHEMBL243532	163
O=C(CCC1CC[NH+](CC1)Cc1ccccc1)c1cc2NCCCc2cc1	CHEMBL73593	165.96
O(C)c1ccccc1C[NH+](CCCCCC(=O)N(CCCCCCCCN(C(=O)CCCCC[NH+](Cc1ccccc1OC)C)C)C)C	CHEMBL557586	170
Clc1cccc(Cl)c1CO\N=C\c1cc[n+](cc1)CCCc1ccccc1	CHEMBL32329	180
O(C)c1cc2c(cc1OC)CC\C(=C/c1ccc(cc1)C[NH+](Cc1ccccc1)C)\C2=O	CHEMBL604096	180
O(CCCC[NH+]1CCCCC1)c1cc2c(C\C(=C/c3ccc(cc3)C[NH+](Cc3ccccc3)C)\C2=O)cc1	CHEMBL597822	180
Fc1cc(cc(F)c1)CC(=O)NCCOc1cc2OC(=O)C(=Cc2cc1)c1ccc(cc1)C[NH+](Cc1ccccc1)CC	CHEMBL26125	181
[NH+]1(CCC(CC1)CCNc1nnc-2c(c1)CCc1c-2cccc1)Cc1ccccc1	CHEMBL1202885	190
[NH+]1(CCC(CC1)CCNc1nnc2c(c1)ccc1c2cccc1)Cc1ccccc1	CHEMBL1202884	190
O(CCCCC[NH+](CC)CC)c1cc2c(C\C(=C/c3ccc(cc3)C[NH+](Cc3ccccc3)C)\C2=O)cc1	CHEMBL599057	190
S1c2cc(OC)c(OC)cc2CC1C(=O)CC(O)C1CC[N+](CC1)(Cc1ccccc1)C	CHEMBL187603	190
S1SCCC1CCCCC(=O)NCCCNC1=CC(=O)C(NCCC[NH+](Cc2ccccc2OC)CC)=CC1=O	CHEMBL574847	190
O=C1C=C(NCCCCCC[NH+](Cc2ccncc2)CC)C(=O)C=C1NCCCCCC[NH+](Cc1ccncc1)CC	CHEMBL241960	192
O=C(CCC1CC[NH+](CC1)Cc1ccccc1)c1cc2NCCCCc2cc1	CHEMBL75013	194.98
[n+]1(ccccc1)Cc1cc2cc(ccc2cc1)C[n+]1ccccc1	CHEMBL1081810	200
O(CCCCC[NH+]1CCCCC1)c1cc2c(C\C(=C/c3ccc(cc3)C[NH+](Cc3ccccc3)C)\C2=O)cc1	CHEMBL603256	200
O1c2cc(OC)c(OC)cc2C=C(c2cc(ccc2)C[NH+](Cc2ccccc2)C)C1=O	CHEMBL243310	202
o1nc(c2c1cccc2)CCC1CC[NH+](CC1)Cc1ccccc1	CHEMBL92460	210
O(CCCCCC[NH+]1CCCCC1)c1ccc(cc1)C(=O)c1ccc(cc1)C[NH+](Cc1ccccc1)C	CHEMBL1773489	210
O=C(c1ccc(cc1)C[NH+](Cc1ccccc1)C)c1ccc(NC(=O)C[NH+](CC)CC)cc1	CHEMBL1773478	210
O=C(c1ccc(cc1)C[NH+](Cc1ccccc1)C)c1ccc(NC(=O)CCCC[NH+]2CCCCC2)cc1	CHEMBL1773481	217
[NH+]1(CCC(CC1)CCNc1nc(N)c(cc1C#N)C#N)Cc1ccccc1	CHEMBL2088784	220
O1c2cc(ccc2OC1)C(=O)CCc1cc[n+](cc1)Cc1ccccc1	CHEMBL363455	240
o1c2c(cccc2)c(C(=O)c2ccccc2)c1-c1cc(OCCCCCCC[NH+](Cc2ccccc2)C)ccc1	CHEMBL2160227	240
[NH+]1(CCC(CC1)CCCNc1nc(N)c(C#N)c(-c2ccccc2)c1C#N)Cc1ccccc1	CHEMBL2088781	240
O(C)c1c(OC)cc(cc1OC)C(=O)NCCCC(=O)NNc1c2CCCCc2[nH+]c2c1cccc2	CHEMBL219063	241
O(C)c1cc2c(C=C(C3CC[N+](CC3)(Cc3ccccc3)C)C2=O)cc1OC	CHEMBL185799	250
S1SCCC1CCCCC(=O)NCCCCCC[NH+](Cc1ccccc1OC)CC	CHEMBL1912062	256
O(CCCCCC[NH+](CC)CC)c1ccc(cc1)C(=O)c1ccc(cc1)C[NH+](Cc1ccccc1)C	CHEMBL1773488	257
O1C[C@]2([C@H]3C(=CC[C@@H]2N=C1[C@H](CC)C)C[C@@H]1[C@@H](CC3)[C@@]2(C[C@@H](O)[C@H]([C@@H]([NH+](C)C)C)[C@]2(CC1=O)C)C)C	CHEMBL393212	265
O1c2c(C=C(c3ccc(cc3)C[NH+](Cc3ccccc3)C)C1=O)cc(N)cc2	CHEMBL244624	281
O1c2c(ccc(OCCCCCCCNc3c4CCCCc4[nH+]c4c3cccc4)c2)C(=O)c2cccnc12	CHEMBL1819174	283
Fc1ccc(cc1)C([NH+]1CC[NH+](CC1)CC[NH+]1CCOCC1)c1ccc(F)cc1	CHEMBL380050	284.2
S1C[C@]2([C@H]3[C@@]4([C@]5([C@@H](CC3)[C@@]3(C[C@@H](O)[C@H]([C@@H](N(C(=O)C)C)C)[C@]3(CC5=O)C)C)C4)CC[C@@H]2N=C1C(C)C)C	CHEMBL1783522	298
[n+]1(cc2c(cccc2)cc1)CCCCCC[n+]1cc2c(cccc2)cc1	CHEMBL1669484	300
[n+]1(ccc(cc1)C(C)(C)C)Cc1ccc(cc1)C[n+]1ccc(cc1)C(C)(C)C	CHEMBL1642987	300
[n+]1(cc2c(cccc2)cc1)Cc1cc2cc(ccc2cc1)C[n+]1cc2c(cccc2)cc1	CHEMBL1669494	300
S1c2c(N(c3c1cccc3)CC([NH+](CC)CC)C)cccc2	CHEMBL1206	300
O1c2c(ccc3c2cccc3)C(c2c1[nH+]c1c(CCCC1)c2N)c1ccccc1	CHEMBL2206891	300
O1c2c(C=C(c3cc(ccc3)C[NH+](Cc3ccccc3)C)C1=O)cc(OC)cc2	CHEMBL413794	303
Clc1ccccc1-c1nc(C(=O)NCCCCNc2c3CCCCc3[nH+]c3c2cccc3)c(n1-c1ccc(Cl)cc1)CC	CHEMBL570159	316.23
o1nc(NCC2CC[NH+](CC2)Cc2ccccc2)c2c1cccc2	CHEMBL92629	323.59
Fc1cc(ccc1F)CCC(=O)NCCOc1cc2OC(=O)C(=Cc2cc1)c1ccc(cc1)C[NH+](Cc1ccccc1)CC	CHEMBL271710	327
O1c2c(ccc3c2cccc3)C(c2c1[nH+]c1c(CCCC1)c2N)c1cc(OC)c(O)cc1	CHEMBL2206895	330
[NH+]1(CCC(CC1)CCC1=N[N+](c2c1cccc2)=C)Cc1ccccc1	CHEMBL362350	340
O(C)c1ccc(cc1)C[NH+]1CCC(CC1)CCC(=O)c1cc2CCC(=O)n3c2c(c1)cc3	CHEMBL1651138	346.74
O1[C@@H]2[C@@]3(CC[NH+](Cc4c3c1c(OC)cc4)CCC[NH+]1CCCCC1)C=C[C@H](O)C2	CHEMBL569978	350
O(C)c1c(OC)cc(cc1OC)CCC(=O)NNc1c2CCCCc2[nH+]c2c1cccc2	CHEMBL219911	365
O1c2cc(OC)c(OC)cc2C=C(c2ccc(cc2)C[NH+](Cc2ccccc2C)C)C1=O	CHEMBL243130	366
O1c2cc(OC)c(OC)cc2C=C(c2ccc(cc2)C[NH+](Cc2cc([N+](=O)[O-])ccc2)C)C1=O	CHEMBL242905	368
O1c2c(ccc3c2cccc3)C(c2c1[nH+]c1c(CCCC1)c2N)c1ccc(OC)cc1OC	CHEMBL2206896	370
O(C)c1ccc(cc1)C1C2=C(Nc3[nH+]c4c(CCCC4)c(N)c13)CC(CC2=O)(C)C	CHEMBL468001	370
O(CCCC1CC[NH+](CC1)Cc1ccccc1)c1cc2cc(n(c2cc1)C)C[NH+](CC#C)C	CHEMBL1929421	380
O(CCCCCC[NH+](CC)CC)c1cc2c(C\C(=C/c3ccc(cc3)C[NH+](Cc3ccccc3)C)\C2=O)cc1	CHEMBL599058	380
s1c2cc(OC)c(OC)cc2cc1C(=O)CC1CCC(O)C[N+](CC1)(Cc1ccccc1)C	CHEMBL189283	380
O(C)c1c(OC)cc(cc1OC)C(=O)NNc1c2CCCCc2[nH+]c2c1cccc2	CHEMBL219262	386
s1c2cc(OC)c(OC)cc2cc1C(=O)C1CCC[N+](CC1)(CCOc1ccccc1)C	CHEMBL188917	390
[NH+]1(CCC(CC1)CCNc1nc(N)c(C#N)c(-c2ccccc2)c1C#N)Cc1ccccc1	CHEMBL2088780	390
S(CCC1CC[NH+](CC1)Cc1ccccc1)c1nnc(cc1)-c1ccccc1	CHEMBL1202874	470
O(CCCCCCC[NH+](CC)CC)c1cc2c(C\C(=C/c3ccc(cc3)C[NH+](Cc3ccccc3)C)\C2=O)cc1	CHEMBL598824	510
O1C[C@]2([C@H]3C(=CC[C@@H]2N=C1C(C)C)C[C@@H]1[C@@H](CC3)[C@@]2(C[C@@H](O)[C@H]([C@@H]([NH2+]C)C)[C@]2(CC1=O)C)C)C	CHEMBL237870	517
s1c2cc(OC)c(OC)cc2cc1C(=O)C=1CC[N+](CC=1)(Cc1ccccc1)C	CHEMBL188325	520
O=C(c1ccc(cc1)C[NH+](Cc1ccccc1)C)c1ccc(NC(=O)C[NH+]2CCCCC2)cc1	CHEMBL1773479	550
Fc1cc(cc(F)c1)CC(=O)NCCOc1cc2C=C(c3ccc(cc3)C[NH+](Cc3ccccc3)CC)C(Oc2cc1)=O	CHEMBL272700	551
O(C)c1cc(ccc1OC)C(=O)c1ccc(cc1)C[NH+](Cc1ccccc1)CC	CHEMBL470907	570
Clc1ccccc1C[NH+](CCCCCCNC1=CC(=O)C(NCCCCCC[NH+](Cc2ccccc2Cl)CC)=CC1=O)CC	CHEMBL243057	593
O=C1[C@]23[C@@H](CC[C@@H]4[C@@]2(CC[C@@H]2N=C(CC[C@]24C)C(C)C)C3)[C@@]2(C[C@@H](O)[C@H]([C@@H]([NH+](C)C)C)[C@]2(C1)C)C	CHEMBL1783535	618
[N+]12(CCC(CC1)CC2)Cc1cc(ccc1)-c1cc(ccc1)C[N+]12CCC(CC1)CC2	CHEMBL1771549	620
[nH+]1c2c(C[NH+](CC2)CC#C)c(N)c2cc(C#N)c(nc12)N1CCCC1	CHEMBL2022933	650
[nH+]1c2c(C3CC(=CC(C3)C2)CC)c(N)c2c1cncc2	CHEMBL575614	664
[n+]1(ccc(cc1)C(C)(C)C)Cc1cc(ccc1)C[n+]1ccc(cc1)C(C)(C)C	CHEMBL1642986	700
O(CCC1CC[NH+](CC1)Cc1ccccc1)c1nnc(cc1)-c1ccccc1	CHEMBL1202875	710
O=C1C2=C(Nc3[nH+]c4c(CCCC4)c(N)c3C2c2ccccc2)CC(C1)(C)C	CHEMBL512096	710
O1c2cc(OC)c(OC)cc2C=C(c2ccc(cc2)C[NH+](Cc2cc(OC)ccc2)C)C1=O	CHEMBL245047	714
O1CC[NH+](CC1)CC(=O)Nc1ccc(cc1)C(=O)c1ccc(cc1)C[NH+](Cc1ccccc1)C	CHEMBL1773480	720
FC(C)(C)C=1OC[C@]2([C@H]3[C@@]4([C@]5([C@@H](CC3)[C@@]3(C[C@@H](O)[C@H]([C@@H]([NH+](C)C)C)[C@]3(CC5=O)C)C)C4)CC[C@@H]2N=1)C	CHEMBL1783530	744
S1c2cc(OC)c(OC)cc2CC1C(=O)CC1CC[N+](CC=C1)(Cc1ccccc1)C	CHEMBL186090	750
[nH+]1c2c(C3CC(=CC(C3)C2)C)c(N)c2cccnc12	CHEMBL575613	810
O(CCCCCCC[NH+](CC)CC)c1ccc(cc1)C(=O)c1ccc(cc1)C[NH+](Cc1ccccc1)C	CHEMBL1773490	810
o1nc(NCCC2CC[NH+](CC2)Cc2ccccc2)c2c1cccc2	CHEMBL328715	812.83
O(CCCC[NH+](CC)CC)c1cc2c(C\C(=C/c3ccc(cc3)C[NH+](Cc3ccccc3)C)\C2=O)cc1	CHEMBL598645	890
O1CC[NH+](CC1)CCCCOc1cc2c(C\C(=C/c3ccc(cc3)C[NH+](Cc3ccccc3)C)\C2=O)cc1	CHEMBL597821	890
O1c2cc(OC)ccc2C=C(c2ccc(cc2)C[NH+](Cc2ccccc2)C)C1=O	CHEMBL413793	892
S1c2cc(OC)c(OC)cc2CC1C(=O)CCc1cc[n+](cc1)C	CHEMBL366114	900
[NH+](Cc1ccccc1)(CCCCCNc1nnc(cc1)-c1ccccc1)C	CHEMBL553187	930
O1c2cc(OC)c(OC)cc2C=C(c2ccc(cc2)C[NH+](Cc2ccccc2[N+](=O)[O-])C)C1=O	CHEMBL265416	987
s1c2cc(OC)c(OC)cc2cc1C(=O)C1CCC[N+](CC1)(CC#N)C	CHEMBL188338	1000
Brc1cc(OC)c(OC)cc1C[NH+]1CC[NH+](CC1)C(c1ccc(F)cc1)c1ccc(F)cc1	CHEMBL209924	1012.9
Fc1ccc(cc1)C([NH+]1CC[NH+](CC1)CCC=1C(=O)C2C(=NC=1C)CCCC2)c1ccc(F)cc1	CHEMBL212111	1072.8
Clc1cc2[nH+]c3CC(CCc3c(N)c2cc1)CNC(=O)CCCCC1SSCC1	CHEMBL363391	1090
O(C)c1cc2c(cc1OC)C\C(=C/c1ccc(cc1)C[NH+](Cc1ccccc1)C)\C2=O	CHEMBL598632	1140
O1C=C(C(=O)c2cc(OC)c(OC)cc12)c1ccc(cc1)C[NH+](Cc1ccccc1)C	CHEMBL244838	1230
O(CCC[NH+](CC)CC)c1cc2c(C\C(=C/c3ccc(cc3)C[NH+](Cc3ccccc3)C)\C2=O)cc1	CHEMBL599254	1320
Fc1ccc(cc1)C([NH+]1CC[NH+](CC1)Cc1cc2OCOc2cc1C)c1ccc(F)cc1	CHEMBL212162	1341.7
O(C)c1cc(ccc1OC)C(=O)c1ccc(cc1)C[NH+](Cc1ccccc1)CCO	CHEMBL511468	1410
O(CC[NH+](CC)CC)c1cc2c(C\C(=C/c3ccc(cc3)C[NH+](Cc3ccccc3)C)\C2=O)cc1	CHEMBL599253	1530
O1c2c(OC1)cc1c(c3[n+](cc4c(c3cc1)ccc(OC)c4OC)C)c2	CHEMBL258893	1540
Fc1cc(ccc1OC)C(=O)c1ccc(cc1)C[NH+](Cc1ccccc1)C	CHEMBL474837	1570
Fc1ccc(cc1)C1C2=C(Nc3[nH+]c4c(CCCC4)c(N)c13)CC(CC2=O)(C)C	CHEMBL468000	1600
O(CCC[NH+](CC)CC)c1cc2c(cc1)C(=O)/C(/C2)=C/c1ccc(cc1)C[NH+](Cc1ccccc1)C	CHEMBL597001	1610
O(C)c1cc(ccc1OC)C(=O)c1ccc(cc1)C[NH+](Cc1cc(ccc1)C)C	CHEMBL471581	1650
O(C)c1c2c(ccc1OC)cc-1[n+](CCc3cc(OC)c(OC)cc-13)c2	CHEMBL2163795	1690
O(C)c1ccc(cc1)C(=O)c1ccc(cc1)C[NH+](Cc1ccccc1)C	CHEMBL514966	1820
[n+]1(ccccc1)CCCCCCCCC[n+]1ccccc1	CHEMBL105742	2000
O(C[n+]1cc2c(cccc2)cc1)C[n+]1cc2c(cccc2)cc1	CHEMBL1669487	2000
Clc1cc2[nH+]c3c(CCCC3)c(NCCCCCCNC(=O)CCc3c4c([nH]c3)cccc4)c2cc1	CHEMBL225567	2000
Clc1cc2[nH+]c3c(CCCC3)c(NCCCCCNC(=O)CCCc3c4c([nH]c3)cccc4)c2cc1	CHEMBL225021	2000
O1C=C(C(=O)c2cc(OC)c(OC)cc12)c1cc(ccc1)C[NH+](Cc1ccccc1)C	CHEMBL245054	2020
O(C)c1cc(ccc1OC)C(=O)c1ccc(cc1)\C=C\C[NH+](Cc1ccccc1)C	CHEMBL474836	2100
O(C)c1cc2c([nH+]c3c(CCCC3)c2NCCCC=C)cc1	CHEMBL1917825	2200
O1c2cc(OC)c(OC)cc2C=C(c2ccc(cc2)C[NH+](Cc2ccc(OC)cc2)C)C1=O	CHEMBL244415	2260
O1c2c(cc(OC)c(OC)c2)C(=O)C=C1c1cc(ccc1)C[NH+](Cc1ccccc1)C	CHEMBL245055	2270
O1c2cc(OC)ccc2C=C(c2cc(ccc2)C[NH+](Cc2ccccc2)C)C1=O	CHEMBL243311	2290
O1c2c(cc(OC)c(OC)c2)C(=O)c2c1cc(OCCCCCCC[NH+](Cc1ccccc1)C)cc2	CHEMBL224981	2320
O(C)c1cc(ccc1OC)C(=O)c1ccc(cc1)C[NH+](CC[NH+](C)C)C	CHEMBL491526	2370
Clc1cc2[nH+]c3c(C4CC(=CC(C4)C3)C)c(NC(=O)CCl)c2cc1	CHEMBL576004	2510
S1c2cc(OC)c(OC)cc2CC1C(=O)CCc1cc[n+](cc1)CCC	CHEMBL187330	2570
s1c2cc(OC)c(OC)cc2cc1C=1CC[N+](CC=1)(Cc1ccccc1)C	CHEMBL191729	2670
O1c2c(ccc(OCCC[NH+](Cc3ccccc3)C)c2)C(=O)c2c1cccc2	CHEMBL225610	2680
Fc1cc(ccc1F)CCC(=O)NCCOc1cc2C=C(c3ccc(cc3)C[NH+](Cc3ccccc3)CC)C(Oc2cc1)=O	CHEMBL248922	2770
O=C1C2=C(Nc3[nH+]c4c(CCCC4)c(N)c3C2c2ccncc2)CC(C1)(C)C	CHEMBL468002	2800
O1c2c(ccc(OCCCCCCC[NH+](Cc3ccccc3)C)c2)C(=O)c2c1cccc2	CHEMBL224433	2820
O1c2c(ccc(OCCCCCC[NH+](Cc3ccccc3)C)c2)C(=O)c2c1cccc2	CHEMBL390737	2890
O(CC[NH+](CC)CC)c1cc2c(cc1)C(=O)/C(/C2)=C/c1ccc(cc1)C[NH+](Cc1ccccc1)C	CHEMBL604715	2900
O(C)c1cc2c(cc1OC)CC[NH+](CCCCCCC#C)C2c1ccc([N+](=O)[O-])cc1	CHEMBL575167	2920
FC(C(F)(F)F)(C(F)(F)F)C=1OC[C@]2([C@H]3[C@@]4([C@]5([C@@H](CC3)[C@@]3(C[C@@H](O)[C@H]([C@@H]([NH+](C)C)C)[C@]3(CC5=O)C)C)C4)CC[C@@H]2N=1)C	CHEMBL1783531	3003
O1c2c(cc(OC)c(OC)c2)C(=O)C=C1c1ccc(cc1)C[NH+](Cc1ccccc1)C	CHEMBL241827	3100
[NH+]1(CCC(Nc2nc(N)c(cc2C#N)C#N)CC1)Cc1ccccc1	CHEMBL2088783	3100
O=C1[C@]23[C@@H](CC[C@@H]4[C@@]2(CC[C@@H]2[NH+]=C(NC[C@]24C)C(C)C)C3)[C@@]2(C[C@@H](O)[C@H]([C@@H]([NH+](C)C)C)[C@]2(C1)C)C	CHEMBL238062	3108
O1c2c(ccc(OCCCCCCC[NH+](Cc3ccccc3OC)CC)c2)C(=O)c2c1cccc2	CHEMBL224553	3150
Fc1ccc(cc1)C([NH+]1CC[NH+](CC1)CCC=1C(=O)N2C(=NC=1C)C=CC=C2)c1ccc(F)cc1	CHEMBL209863	3203.7
Clc1ccc(cc1)\C=C\1/CN(C\C(=C/c2ccc(Cl)cc2)\C/1=O)C(=O)C[C@H]1C[C@@H]2[NH+](CCC2)[C@@]12c1c(NC2=O)cccc1	CHEMBL2332979	3360
S1c2c(N(c3c1cccc3)C(=O)C([NH+](CC)CC)C)cccc2	CHEMBL1782730	3370
[n+]1(ccc(cc1)C(C)(C)C)C\C=C\C[n+]1ccc(cc1)C(C)(C)C	CHEMBL1642983	3400
O1c2c(ccc(OCCC[NH+](Cc3ccccc3OC)C)c2)C(=O)c2c1cccc2	CHEMBL390083	3400
O1c2c(ccc3c2cccc3)C(c2c1[nH+]c1c(CCCC1)c2N)c1cc(OC)c(OC)c(OC)c1	CHEMBL2206897	3510
[n+]1(ccc(cc1)C(C)(C)C)CCCC[n+]1ccc(cc1)C(C)(C)C	CHEMBL1642973	3700
O(C)c1ccccc1C[NH+](Cc1ccc(cc1)C(=O)c1cc(OC)c(OC)cc1)C	CHEMBL513236	3710
O=C1[C@H]2[C@@H](CC[C@@H]3C(=CC[C@@H]4[NH+]=C(NC[C@@]34C)[C@H](CC)C)C2)[C@@]2(C[C@@H](O)[C@H]([C@@H]([NH+](C)C)C)[C@]2(C1)C)C	CHEMBL235548	3832
O(CCCC[NH+](CC)CC)c1cc2c(cc1)C(=O)/C(/C2)=C/c1ccc(cc1)C[NH+](Cc1ccccc1)C	CHEMBL599252	3950
Clc1cccc(Cl)c1C1c2c(Oc3c1ccc1c3cccc1)[nH+]c1c(CCCC1)c2N	CHEMBL2206899	4010
Clc1cc(Cl)ccc1\C=C\1/CN(C\C(=C/c2ccc(Cl)cc2Cl)\C/1=O)C(=O)C[C@H]1C[C@@H]2[NH+](CCC2)[C@@]12c1c(NC2=O)cccc1	CHEMBL2332977	4110
O(C)c1cc2c(CC(CC3CC[NH+](CC3)Cc3ccccc3)C2=O)cc1OC	CHEMBL502	4150
Clc1cc(ccc1Cl)\C=C\C(=O)NCCOc1cc2OC(=O)C(=Cc2cc1)c1ccc(cc1)C[NH+](Cc1ccccc1)CC	CHEMBL270248	4230
O(C)c1cc(ccc1OC)C(=O)c1ccc(cc1)C[NH+](Cc1cc([N+](=O)[O-])ccc1)C	CHEMBL490360	4270
O=C1[C@]23[C@@H](CC[C@@H]4[C@@]2(CC[C@@H]2[NH+]=C(NC[C@]24C)[C@H](CC)C)C3)[C@@]2(C[C@@H](O)[C@H]([C@@H]([NH+](C)C)C)[C@]2(C1)C)C	CHEMBL238063	4368
O1c2c(ccc3c2cccc3)C(c2c1[nH+]c1c(CCCC1)c2N)c1ccccc1OC	CHEMBL2206894	4530
Fc1cc(cc(F)c1)\C=C\C(=O)NCCOc1cc2OC(=O)C(=Cc2cc1)c1ccc(cc1)C[NH+](Cc1ccccc1)CC	CHEMBL271709	4570
O(C)c1cc2c([nH+]c3c(CCCC3)c2N2CCCCCN(CCCCC2)c2c3CCCCc3[nH+]c3c2cc(OC)cc3)cc1	CHEMBL1917826	4600
o1c2[nH+]c3c(C4CC(=CC(C4)C3)C)c(N)c2c(C)c1C	CHEMBL574746	4780
O(C)c1cc2c(C\C(=C/c3ccc(cc3)C[NH+](Cc3ccccc3)CC)\C2=O)cc1	CHEMBL597405	4930
Clc1cc(ccc1Cl)C1c2c(Oc3c1ccc1c3cccc1)[nH+]c1c(CCCC1)c2N	CHEMBL2206900	5070
O(C)c1cc2c([nH+]c3c(C4CC(=CC(C4)C3)CC)c2N)cc1OC	CHEMBL573094	5100
O1C[C@]2([C@H]3C(=CC[C@@H]2N=C1C)C[C@@H]1[C@@H](CC3)[C@@]2(C[C@@H](O)[C@H]([C@@H]([NH+](C)C)C)[C@]2(CC1=O)C)C)C	CHEMBL391918	5242
O(C)c1cc2c(CC\C(=C/c3ccc(cc3)C[NH+](Cc3ccccc3)C)\C2=O)cc1	CHEMBL597795	5380
O(C)c1ccccc1C[NH+](CCCCCC(=O)N[C@H]1CCCC[C@@H]1NC(=O)CCCCC[NH+](Cc1ccccc1OC)CC)CC	CHEMBL450506	5470
n1c(NCc2c3c(ccc2)cccc3)ccnc1N1CCCC1	CHEMBL1084210	5500
O1c2c(ccc3c2cccc3)C(c2c1[nH+]c1c(CCCC1)c2N)c1ccc([N+](=O)[O-])cc1	CHEMBL2206898	5740
O1c2c(ccc(OCCCC[NH+](Cc3ccccc3)C)c2)C(=O)c2c1cccc2	CHEMBL225611	6250
O(C)c1cc2c([nH+]c3c(CCCC3)c2NCCCCC)cc1	CHEMBL1257886	6700
O=C/1/C(/CN(C\C\1=C/c1c2c(ccc1)cccc2)C(=O)C[C@H]1C[C@@H]2[NH+](CCC2)[C@@]12c1c(NC2=O)cccc1)=C/c1c2c(ccc1)cccc2	CHEMBL2332545	6760
[n+]1(cc2c(cccc2)cc1)C\C=C\C[n+]1cc2c(cccc2)cc1	CHEMBL1669489	7000
Clc1cc2[nH+]c3c(CCCC3)c(NCCCCCCCNC(=O)Cc3c4c([nH]c3)cccc4)c2cc1	CHEMBL223443	7000
Fc1cc(cc(F)c1)\C=C\C(=O)NCCOc1cc2C=C(c3ccc(cc3)C[NH+](Cc3ccccc3)CC)C(Oc2cc1)=O	CHEMBL239046	7160
O1[C@@H]2[C@@]3(CC[NH+](Cc4c3c1c(OC)cc4)C)C=C[C@H](O)C2	CHEMBL659	7300
s1c2c([nH+]c3c(C4CC(=CC(C4)C3)C)c2N)nc1SCCC	CHEMBL574261	7690
Fc1ccc(cc1)CNc1nc(ncc1)NC1CC[NH+](CC1)Cc1ccccc1	CHEMBL2047227	7700
Clc1ccccc1CNc1nc(ncc1)NC1CC[NH+](CC1)Cc1ccccc1	CHEMBL2047223	7700
Clc1cc(ccc1)CNc1nc(ncc1)NC1CC[NH+](CC1)Cc1ccccc1	CHEMBL2047224	7700
O1c2c(ccc(OCCCCC[NH+](Cc3ccccc3)C)c2)C(=O)c2c1cccc2	CHEMBL427249	7780
Clc1ccc(cc1)\C=C\1/CN(C[C@@]2(C[C@@H]3[NH+](CCC3)[C@]23c2c(NC3=O)cccc2)C/1=O)C(=O)C[C@H]1C[C@@H]2[NH+](CCC2)[C@@]12c1c(NC2=O)cccc1	CHEMBL2332541	7920
[n+]1(cc2c(cccc2)cc1)Cc1cc(ccc1)C[n+]1cc2c(cccc2)cc1	CHEMBL1669492	8000
[NH+]1(CCN(CC1)c1nc(NCc2c3c(ccc2)cccc3)ccn1)C1CCCCC1	CHEMBL1834063	8000
O(C)c1cc2c(cc1OC)CC[NH+](CCCCCCC#C)C2c1cc([N+](=O)[O-])ccc1	CHEMBL575810	8080
O(C)c1ccccc1C[NH+](CCCCCC(=O)NC1CCC(NC(=O)CCCCC[NH+](Cc2ccccc2OC)CC)CC1)CC	CHEMBL499722	8550
O(C)c1cc(ccc1OC)C(=O)c1ccc(cc1)C[NH+](Cc1ccccc1)CC[NH+](C)C	CHEMBL492098	8640
n1c(NCc2ccccc2)ccnc1N1CCCC1	CHEMBL1085780	8700
O(C)c1ccccc1\C=C\1/CN(C\C(=C/c2ccccc2OC)\C/1=O)C(=O)C=C	CHEMBL2332539	8720
n1c(NCCc2ccccc2)ccnc1N1CCC(CC1)C	CHEMBL1082981	8800
Clc1ccc(cc1)CNc1nc(ncc1)NC1CC[NH+](CC1)Cc1ccccc1	CHEMBL2047225	8800
[NH+]1(CCC(Nc2nc(N)c(C#N)c(-c3ccccc3)c2C#N)CC1)Cc1ccccc1	CHEMBL2088687	8800
[n+]1(c2c(cccc2)ccc1)CCC[n+]1c2c(cccc2)ccc1	CHEMBL1761991	9000
Clc1cc2[nH+]c3c(CCCC3)c(NCCCCCCCNC(=O)CCc3c4c([nH]c3)cccc4)c2cc1	CHEMBL225198	9000
O(C)c1cc2c([nH+]c3c(CCCC3)c2NCCC)cc1	CHEMBL1257996	9200
O(C)c1ccccc1[C@H]([NH+](CCCCCCNC1=CC(=O)C(NCCCCCC[NH+]([C@H](C)c2ccccc2OC)CC)=CC1=O)CC)C	CHEMBL540178	9340
O(C)c1ccc(cc1)CNc1nc(ncc1)NC1CC[NH+](CC1)Cc1ccccc1	CHEMBL2047229	9400
O=C/1/C(/CN(C\C\1=C/c1cc([N+](=O)[O-])ccc1)C(=O)C=C)=C/c1cc([N+](=O)[O-])ccc1	CHEMBL2332537	9760
n1c(NCCc2ccccc2)ccnc1N1CCCC1	CHEMBL1082978	9800
OCC[NH+]1CCN(CC1)c1nc(NCc2c3c(ccc2)cccc3)ccn1	CHEMBL1834067	9800
Brc1ccc(cc1)CNc1nc(ncc1)NC1CC[NH+](CC1)Cc1ccccc1	CHEMBL2047226	9900
O(C)c1cc(ccc1OC)CNc1nc(ncc1)NC1CC[NH+](CC1)Cc1ccccc1	CHEMBL2047230	9900
[n+]1(ccc(cc1)C(C)(C)C)Cc1ccccc1C[n+]1ccc(cc1)C(C)(C)C	CHEMBL1642985	10000
[NH+]1(CCN(CC1)c1nc(NC(c2ccccc2)c2ccccc2)ccn1)C1CCCCC1	CHEMBL1834074	10000

## Sheet: S2E
Table S2E: BACE-1 active molecules lists
SMILES	NAME	IC50	Models 1,5 - tanimoto=1		SMILES	NAME	IC50	Models 2,6 - tanimoto=0.9		SMILES	NAME	IC50	Models 3,7 - tanimoto=0.8		SMILES	NAME	IC50	Models 4,8 - tanimoto=0.7		comment:
CO[C@H](C[C@H](O)[C@H](COc1cc(F)cc(F)c1)NC(=O)c2cc(cc(c2)C(=O)N[C@H](C)c3ccccc3)N(C)S(=O)(=O)C)C(=O)N[C@@H](C(C)C)C(=O)NCc4ccccc4	CHEMBL573106	0.32			CO[C@H](C[C@H](O)[C@H](COc1cc(F)cc(F)c1)NC(=O)c2cc(cc(c2)C(=O)N[C@H](C)c3ccccc3)N(C)S(=O)(=O)C)C(=O)N[C@@H](C(C)C)C(=O)NCc4ccccc4	CHEMBL573106	0.32			CO[C@H](C[C@H](O)[C@H](COc1cc(F)cc(F)c1)NC(=O)c2cc(cc(c2)C(=O)N[C@H](C)c3ccccc3)N(C)S(=O)(=O)C)C(=O)N[C@@H](C(C)C)C(=O)NCc4ccccc4	CHEMBL573106	0.32			CC(C)C[C@H](NC(=O)[C@@H](NC(=O)[C@@H](N)CNC(=O)O)C(C)C)C(=O)N[C@@H](Cc1ccccc1)[C@@H](O)C(=O)Nc2cc(cc(c2)C(=O)O)C(=O)O	CHEMBL288713	3.4			Models 1-4 are AvI (Actives vs. Inactives) models.
C[C@@]1(N)Cc2cccc(CC[C@@H](NC(=O)c3cc(COC1=O)cc(c3)N(c4ccccc4)S(=O)(=O)C)c5ccccc5)c2	CHEMBL250295	1			CC(C)c1cccc(c1)C2(CC2)NC[C@@H](O)[C@@H]3Cc4cccc(OCCCCOc5cc(cc(c5)C(=O)N3)N6CCCC6=O)c4	CHEMBL595100	1			CC(C)c1cccc(c1)C2(CC2)NC[C@@H](O)[C@@H]3Cc4cccc(OCCCCOc5cc(cc(c5)C(=O)N3)N6CCCC6=O)c4	CHEMBL595100	1			CCCCS(=O)(=O)C[C@@H](NC(=O)c1cnccn1)C(=O)N[C@@H](Cc2cc(F)cc(F)c2)[C@H](O)CNCc3cccc(CC)c3	CHEMBL409875	4			Actives with IC50 < 10,000 nanomolar
CC(C)c1cccc(c1)C2(CC2)NC[C@@H](O)[C@@H]3Cc4cccc(OCCCCOc5cc(cc(c5)C(=O)N3)N6CCCC6=O)c4	CHEMBL595100	1			CCCN(CCC)C(=O)c1cccc(c1)C(=O)N[C@@H](Cc2cc(F)cc(F)c2)[C@@H](O)CC(=O)N[C@@H](C(C)C)C(=O)N[C@H]3C[C@H](C[C@H](C3)C(=O)O)C(=O)O	CHEMBL44027	1			CCCN(CCC)C(=O)c1cccc(c1)C(=O)N[C@@H](Cc2cc(F)cc(F)c2)[C@@H](O)CC(=O)N[C@@H](C(C)C)C(=O)N[C@H]3C[C@H](C[C@H](C3)C(=O)O)C(=O)O	CHEMBL44027	1			CN(C)S(=O)(=O)N(C)c1cc2COC(=O)[C@](C)(N)Cc3cccc(CC[C@@H](NC(=O)c(c2)c1)c4ccccc4)c3	CHEMBL427884	4			Models 5-8 are HvL (High- vs. Low- activity molecules) models.
CCCC(CCC)S(=O)(=O)C[C@@H](NC(=O)c1cccnc1)C(=O)N[C@@H](Cc2cc(F)cc(F)c2)[C@H](O)CNCc3cccc(CC)c3	CHEMBL231862	1			CCCS(=O)(=O)N(C)c1cc2NCCCCOc3cccc(C[C@H](NC(=O)c(c2)c1)[C@H](O)CNCc4cccc(c4)C(C)C)c3	CHEMBL595016	1			CCCS(=O)(=O)N(C)c1cc2NCCCCOc3cccc(C[C@H](NC(=O)c(c2)c1)[C@H](O)CNCc4cccc(c4)C(C)C)c3	CHEMBL595016	1			CC(C)C[C@H](NC(=O)[C@@H](NC(=O)[C@@H](N)CNC(=O)c1nn[nH]n1)C(C)C)C(=O)N[C@@H](Cc2ccccc2)[C@@H](O)C(=O)Nc3cccc(c3)c4noc(O)n4	CHEMBL205333	6.6			Highly Actives with IC50 < 100 nanomolar. Low activity with IC50> 1000 nanomolar.
CCCN(CCC)C(=O)c1cccc(c1)C(=O)N[C@@H](Cc2cc(F)cc(F)c2)[C@@H](O)CC(=O)N[C@@H](C(C)C)C(=O)N[C@H]3C[C@H](C[C@H](C3)C(=O)O)C(=O)O	CHEMBL44027	1			COc1cccc(CNC[C@@H](O)[C@H](Cc2ccccc2)NC(=O)c3cc(cc(c3)C(=O)N[C@H](C)c4ccccc4)N(C)S(=O)(=O)C)c1	CHEMBL403268	1			CSCC[C@H](NC(=O)[C@@H](NC(=O)OC(C)(C)C)C(C)C)C(=O)N[C@@H](CC(C)C)[C@@H](O)C[C@@H](C)C(=O)N[C@@H](C(C)C)C(=O)NCc1ccccc1	CHEMBL290001	3			C[C@@H](NC(=O)c1cc(cc(c1)c2oc(cn2)[C@](C)(N)Cc3ccccc3)N(C)S(=O)(=O)C)c4ccc(F)cc4	CHEMBL1096683	7			LEGEND
CCCS(=O)(=O)N(C)c1cc2NCCCCOc3cccc(C[C@H](NC(=O)c(c2)c1)[C@H](O)CNCc4cccc(c4)C(C)C)c3	CHEMBL595016	1			CC(C)C[C@H](NC(=O)[C@@H](NC(=O)[C@@H](N)CNC(=O)c1nn[nH]n1)C(C)C)C(=O)N[C@@H](Cc2ccccc2)[C@@H](O)C(=O)Nc3cc(cc(c3)c4nn[nH]n4)c5nn[nH]n5	CHEMBL439521	1.2			CC(C)C[C@H](NC(=O)[C@@H](NC(=O)[C@@H](N)CNC(=O)O)C(C)C)C(=O)N[C@@H](Cc1ccccc1)[C@@H](O)C(=O)Nc2cc(cc(c2)C(=O)O)C(=O)O	CHEMBL288713	3.4			NC1=Nc2cnc3Oc4cccc(CCN(C5CCCCC5)C(=O)CC[C@@H](C6CCCCC6)N1Cc2c3)c4	CHEMBL1095431	7			pale green-highly active (in both types of models: AvI & HvL).
COc1cccc(CNC[C@@H](O)[C@H](Cc2ccccc2)NC(=O)c3cc(cc(c3)C(=O)N[C@H](C)c4ccccc4)N(C)S(=O)(=O)C)c1	CHEMBL403268	1			CCCC(CCC)S(=O)(=O)C[C@@H](NC(=O)OCc1ccccc1)C(=O)N[C@@H](Cc2cc(F)cc(F)c2)[C@H](O)CNCc3cccc(CC)c3	CHEMBL231863	3			CCCCS(=O)(=O)C[C@@H](NC(=O)c1cc(C)[nH]n1)C(=O)N[C@@H](Cc2cc(F)cc(F)c2)[C@H](O)CNCc3cccc(CC)c3	CHEMBL409947	4			CCc1cc(cc(CC)n1)[C@@]2(N=C(N)N(C)C2=O)c3cccc(c3)c4cccnc4F	CHEMBL598290	10			light blue-actives (not high, for AvI models)
CC(C)C[C@H](NC(=O)[C@@H](NC(=O)[C@@H](N)CNC(=O)c1nn[nH]n1)C(C)C)C(=O)N[C@@H](Cc2ccccc2)[C@@H](O)C(=O)Nc3cc(cc(c3)c4nn[nH]n4)c5nn[nH]n5	CHEMBL439521	1.2			CSCC[C@H](NC(=O)[C@@H](NC(=O)OC(C)(C)C)C(C)C)C(=O)N[C@@H](CC(C)C)[C@@H](O)C[C@@H](C)C(=O)N[C@@H](C(C)C)C(=O)NCc1ccccc1	CHEMBL290001	3			CCCCS(=O)(=O)C[C@@H](NC(=O)c1cnccn1)C(=O)N[C@@H](Cc2cc(F)cc(F)c2)[C@H](O)CNCc3cccc(CC)c3	CHEMBL409875	4			CC(C)C[C@H](NC(=O)[C@@H](NC(=O)[C@@H](N)CNC(=O)C1=C(F)C(=O)NC(=O)N1)C(C)C)C(=O)N[C@@H](Cc2ccccc2)[C@@H](O)C(=O)Nc3cccc(c3)C4=NOC(=S)N4	CHEMBL1094663	10.2			light blue+red script-low activity- "inactives" for HvL models
CC(C)C[C@H](NC(=O)c1cc(cc(c1)C(=O)NCc2nc(C)oc2C)N(C)S(=O)(=O)C)[C@@H](O)C[C@@H](C)C(=O)N[C@@H](C(C)C)C(=O)NC(C)C	CHEMBL376504	1.8			CC(C)C[C@H](NC(=O)[C@@H](NC(=O)[C@@H](N)CNC(=O)O)C(C)C)C(=O)N[C@@H](Cc1ccccc1)[C@@H](O)C(=O)Nc2cc(cc(c2)C(=O)O)C(=O)O	CHEMBL288713	3.4			CN(C)S(=O)(=O)N(C)c1cc2COC(=O)[C@](C)(N)Cc3cccc(CC[C@@H](NC(=O)c(c2)c1)c4ccccc4)c3	CHEMBL427884	4			CC(C)C[C@H](NC(=O)c1cc(cc(c1)C(=O)NC(C)c2nc(C)oc2C)N(C)S(=O)(=O)C)[C@@H](O)C[C@@H](C)C(=O)N[C@@H](C(C)C)C(=O)NC(C)C	CHEMBL390159	10.3
CCCC(CCC)S(=O)(=O)C[C@@H](NC(=O)c1ccc(OC)cc1)C(=O)N[C@@H](Cc2cc(F)cc(F)c2)[C@H](O)CNCc3cccc(CC)c3	CHEMBL231861	2			CC(C)C[C@H](NC(=O)[C@@H](NC(=O)[C@@H](N)CNC(=O)c1nn[nH]n1)C(C)C)C(=O)N[C@@H](Cc2ccccc2)[C@@H](O)C(=O)Nc3cc(cc(c3)C(=O)O)C(=O)O	CHEMBL183546	3.9			CCCC(CCC)S(=O)(=O)C[C@@H](NC(=O)c1cccc(Cl)c1)C(=O)N[C@@H](Cc2cc(F)cc(F)c2)[C@H](O)CNCc3cccc(CC)c3	CHEMBL266565	5			CC(C)C[C@H](NC(=O)[C@@H](N)CCC(=O)O)C(=O)N[C@@H](CC(=O)O)C(=O)N[C@@H](CC(C)C)P(=O)(O)CC(C)C(=O)N[C@@H](C(C)C)C(=O)N[C@@H](CCC(=O)O)C(=O)N[C@@H](Cc1ccccc1)C(=O)O	CHEMBL242315	12
CCCC(CCC)S(=O)(=O)C[C@@H](NC(=O)c1cccc(O)c1)C(=O)N[C@@H](Cc2cc(F)cc(F)c2)[C@H](O)CNCc3cccc(CC)c3	CHEMBL266566	2			CCCCS(=O)(=O)C[C@@H](NC(=O)c1cc(C)[nH]n1)C(=O)N[C@@H](Cc2cc(F)cc(F)c2)[C@H](O)CNCc3cccc(CC)c3	CHEMBL409947	4			CCCCS(=O)(=O)C[C@@H](NC(=O)c1cnccc1O)C(=O)N[C@@H](Cc2cc(F)cc(F)c2)[C@H](O)CNCc3cccc(CC)c3	CHEMBL266531	5			COCC#Cc1cc(ccc1F)[C@]2(N=C(N)N(C)C2=O)c3ccc(OC(F)F)cc3	CHEMBL1270526	12
CCCCS(=O)(=O)C[C@@H](NC(=O)c1cccnc1)C(=O)N[C@@H](Cc2cc(F)cc(F)c2)[C@H](O)CNCc3cccc(CC)c3	CHEMBL266567	2			CCCCS(=O)(=O)C[C@@H](NC(=O)c1cnccn1)C(=O)N[C@@H](Cc2cc(F)cc(F)c2)[C@H](O)CNCc3cccc(CC)c3	CHEMBL409875	4			CC(C)[C@H](NC(=O)[C@@H](N)CNC(=O)C1=C(F)C(=O)NC(=O)N1)C(=O)N[C@@H](CC2CCCCC2)C(=O)N[C@@H](Cc3ccccc3)[C@@H](O)C(=O)Nc4cccc(c4)c5nn[nH]n5	CHEMBL255838	5.6			CC(=O)N[C@H](Cc1cc(F)cc(F)c1)[C@@H](O)CNC2(CCc3nc(N)ncc3C2)c4cccc(c4)C(C)(C)C	CHEMBL609988	14
CCCN(CCC)C(=O)c1cc(C)cc(c1)C(=O)N[C@@H](Cc2cc(F)cc(F)c2)[C@H](O)CNCc3cccc(CC)c3	CHEMBL397275	2			CCCCS(=O)(=O)C[C@@H](NC(=O)c1ncc[nH]1)C(=O)N[C@@H](Cc2cc(F)cc(F)c2)[C@H](O)CNCc3cccc(CC)c3	CHEMBL391144	4			CC(C)C[C@H](NC(=O)[C@@H](NC(=O)[C@@H](N)CNC(=O)c1nn[nH]n1)C(C)C)C(=O)N[C@@H](Cc2ccccc2)[C@@H](O)C(=O)Nc3cccc(c3)c4noc(O)n4	CHEMBL205333	6.6			COC[C@H]1CCCN1C(=O)c2cc(C)cc(c2)C(=O)N[C@@H](Cc3cc(F)cc(F)c3)[C@H](O)[C@H]4CN(CCN4)S(=O)(=O)Cc5ccccc5	CHEMBL1097353	14
CCCS(=O)(=O)N(C)c1cc2NCCCCOc3cccc(C[C@H](NC(=O)c(c2)c1)[C@H](O)CNC4(CC4)c5cccc(c5)C(C)C)c3	CHEMBL595136	2			CN(C)S(=O)(=O)N(C)c1cc2COC(=O)[C@](C)(N)Cc3cccc(CC[C@@H](NC(=O)c(c2)c1)c4ccccc4)c3	CHEMBL427884	4			C[C@@H](NC(=O)c1cc(cc(c1)c2oc(cn2)[C@](C)(N)Cc3ccccc3)N(C)S(=O)(=O)C)c4ccc(F)cc4	CHEMBL1096683	7			CCCCS(=O)(=O)C[C@@H](NC(=O)SC1CCOC1)C(=O)N[C@@H](Cc2cc(F)cc(F)c2)[C@H](O)CNCc3cccc(CC)c3	CHEMBL409948	15
CN(c1cc2COC(=O)[C@](C)(N)Cc3cccc(CC[C@@H](NC(=O)c(c2)c1)c4ccccc4)c3)S(=O)(=O)C	CHEMBL400438	2			CCCC(CCC)S(=O)(=O)C[C@@H](NC(=O)c1cccc(Cl)c1)C(=O)N[C@@H](Cc2cc(F)cc(F)c2)[C@H](O)CNCc3cccc(CC)c3	CHEMBL266565	5			NC1=Nc2cnc3Oc4cccc(CCN(C5CCCCC5)C(=O)CC[C@@H](C6CCCCC6)N1Cc2c3)c4	CHEMBL1095431	7			CCNc1cc(cc(N2CCCCS2(=O)=O)c1OC)C(=O)N[C@@H](Cc3ccccc3)[C@H](O)CNCc4cccc(c4)C(F)(F)F	CHEMBL501927	18
CCCC(CCC)S(=O)(=O)C[C@@H](NC(=O)OC)C(=O)N[C@@H](Cc1cc(F)cc(F)c1)[C@H](O)CNCc2cccc(CC)c2	CHEMBL414145	3			CCCCS(=O)(=O)C[C@@H](NC(=O)c1ccncc1)C(=O)N[C@@H](Cc2cc(F)cc(F)c2)[C@H](O)CNCc3cccc(CC)c3	CHEMBL394271	5			CCCCS(=O)(=O)CC(NC(=O)OCCC#N)C(=O)N[C@@H](Cc1cc(F)cc(F)c1)[C@H](O)CNCc2cccc(CC)c2	CHEMBL231864	8			CC(C)c1cccc(CNC[C@@H](O)[C@@H]2Cc3cccc(OCCCCNc4cc(cc(c4)C(=O)N2)N5COC=C5)c3)c1	CHEMBL595065	19
CCCC(CCC)S(=O)(=O)C[C@@H](NC(=O)OCc1ccccc1)C(=O)N[C@@H](Cc2cc(F)cc(F)c2)[C@H](O)CNCc3cccc(CC)c3	CHEMBL231863	3			CCCCS(=O)(=O)C[C@@H](NC(=O)c1cnccc1O)C(=O)N[C@@H](Cc2cc(F)cc(F)c2)[C@H](O)CNCc3cccc(CC)c3	CHEMBL266531	5			CC(=O)N[C@@H](Cc1cc(F)cc(F)c1)[C@H](O)CN[C@]2(CC\C(=N\O)\NC2)c3cccc(c3)C(C)(C)C	CHEMBL566603	8.8			C[C@@H](NC(=O)c1cc(cc(c1)c2oc(cc2)C(C)(N)Cc3ccccc3)N(C)S(=O)(=O)C)c4ccc(F)cc4	CHEMBL1092146	20
CCCC(CCC)S(=O)(=O)C[C@@H](NC(=O)OCc1ccncc1)C(=O)N[C@@H](Cc2cc(F)cc(F)c2)[C@H](O)CNCc3cccc(CC)c3	CHEMBL394270	3			CCNc1cc(cc(c1)C(=O)N[C@@H](Cc2ccccc2)[C@H](O)CNc3cccc(c3)C(F)(F)F)N4CCCCS4(=O)=O	CHEMBL1165545	5			O[C@@H]([C@H](Cc1ccccc1)NC(=O)c2cc(Br)cc(n2)C(=O)N3COC[C@@H]3c4ccc(F)cc4)C(=O)Nc5cccc(c5)c6nn[nH]n6	CHEMBL453211	9			CN1C(=N[C@](C1=O)(c2ccc(OC(F)F)cc2)c3cccc(c3)\C(=C/C4CC4)\F)N	CHEMBL1270527	20
CCn1cc2CCS(=O)(=O)N(C)c3cc(cc1c23)C(=O)N[C@@H](Cc4ccccc4)[C@@H](O)CNCCC(F)(F)F	CHEMBL564530	3			CC(C)C[C@H](NC(=O)[C@H](CC(=O)O)NC(=O)[C@H](CC(C)C)NC(=O)[C@@H](N)CCC(=O)O)[C@@H](O)C[C@@H](C)C(=O)N[C@@H](C(C)C)C(=O)N[C@@H](CCC(=O)O)C(=O)N[C@@H](Cc1ccccc1)C(=O)O	CHEMBL390456	6			CCc1cc(cc(CC)n1)[C@@]2(N=C(N)N(C)C2=O)c3cccc(c3)c4cccnc4F	CHEMBL598290	10			CC(C)c1ccc2OC(C)(C)C[C@H](NC[C@@H](O)[C@@H]3C[C@H](C)CCCCCCCCC(=O)N(C)[C@@H](C)C(=O)N3)c2c1	CHEMBL558488	24
CSCC[C@H](NC(=O)[C@@H](NC(=O)OC(C)(C)C)C(C)C)C(=O)N[C@@H](CC(C)C)[C@@H](O)C[C@@H](C)C(=O)N[C@@H](C(C)C)C(=O)NCc1ccccc1	CHEMBL290001	3			CC(C)C[C@H](NC(=O)[C@@H](NC(=O)[C@@H](N)CCC(=O)O)C(C)C)C(=O)N[C@@H](Cc1ccccc1)[C@@H](O)C(=O)Nc2cc(cc(c2)c3nn[nH]n3)c4nn[nH]n4	CHEMBL205217	6.4			CC(C)C[C@H](NC(=O)[C@@H](NC(=O)[C@@H](N)CNC(=O)C1=C(F)C(=O)NC(=O)N1)C(C)C)C(=O)N[C@@H](Cc2ccccc2)[C@@H](O)C(=O)Nc3cccc(c3)C4=NOC(=S)N4	CHEMBL1094663	10.2			CC(C)c1cccc(CNC[C@@H](O)[C@@H]2Cc3cccc(OCCCCNc4cc(cc(C)n4)C(=O)N2)c3)c1	CHEMBL601681	27
CC(C)[C@H](NC(=O)[C@@H](N)CNC(=O)c1nn[nH]n1)C(=O)N[C@@H](CC2CCCCC2)C(=O)N[C@@H](Cc3ccccc3)[C@@H](O)C(=O)Nc4cccc(c4)c5nn[nH]n5	CHEMBL411711	3.3			CC(C)C[C@H](NC(=O)[C@@H](NC(=O)[C@@H](N)CNC(=O)C1=C(F)C(=O)NC(=O)N1)C(C)C)C(=O)N[C@@H](Cc2ccccc2)[C@@H](O)C(=O)Nc3cccc(c3)c4nn[nH]n4	CHEMBL380381	6.5			CC(C)C[C@H](NC(=O)c1cc(cc(c1)C(=O)NC(C)c2nc(C)oc2C)N(C)S(=O)(=O)C)[C@@H](O)C[C@@H](C)C(=O)N[C@@H](C(C)C)C(=O)NC(C)C	CHEMBL390159	10.3			CC(C)C[C@H](NC(=O)[C@@H](NC(=O)[C@@H](N)CNC(=O)c1nn[nH]n1)C(C)C)C(=O)N[C@@H](Cc2ccccc2)[C@@H](O)C(=O)NS(=O)(=O)C(F)(F)F	CHEMBL270172	29.9
CC(C)C[C@H](NC(=O)[C@@H](NC(=O)[C@@H](N)CNC(=O)O)C(C)C)C(=O)N[C@@H](Cc1ccccc1)[C@@H](O)C(=O)Nc2cc(cc(c2)C(=O)O)C(=O)O	CHEMBL288713	3.4			CC(C)C[C@H](NC(=O)[C@@H](NC(=O)[C@@H](N)CNC(=O)c1nn[nH]n1)C(C)C)C(=O)N[C@@H](Cc2ccccc2)[C@@H](O)C(=O)Nc3cccc(c3)c4noc(O)n4	CHEMBL205333	6.6			CC(C)C[C@H](NC(=O)[C@@H](NC(=O)[C@@H](N)CNC(=O)c1cc(O)ccc1O)C(C)C)C(=O)N[C@@H](Cc2ccccc2)[C@@H](O)C(=O)Nc3cccc(c3)C4=NOC(=S)N4	CHEMBL1094664	10.6			CN1C(=N[C@](C1=O)(c2ccc(OC(F)F)cc2)c3cccc(OCCC=C(F)F)c3)N	CHEMBL1270529	30
CC(C)C[C@H](NC(=O)[C@@H](NC(=O)[C@@H](N)CNC(=O)c1nn[nH]n1)C(C)C)C(=O)N[C@@H](Cc2ccccc2)[C@@H](O)C(=O)Nc3cc(cc(c3)C(=O)O)C(=O)O	CHEMBL183546	3.9			C[C@@H](NC(=O)c1cc(cc(c1)c2oc(cn2)[C@](C)(N)Cc3ccccc3)N(C)S(=O)(=O)C)c4ccc(F)cc4	CHEMBL1096683	7			CC(=O)N[C@H](Cc1cc(F)cc(F)c1)[C@@H](O)CNC2(CCc3n[nH]cc3C2)c4cccc(c4)C(C)(C)C	CHEMBL609987	12			CSCC[C@H](NC(=O)[C@@H](NC(=O)C)C(C)C)C(=O)N[C@@H](CC(C)C)[C@@H](O)C[C@@H](C(C)C)C(=O)N[C@@H](C)C(=O)N[C@@H](CCC(=O)O)C(=O)N[C@@H](Cc1ccccc1)C(=O)O	CHEMBL446351	30
CCCC(CCC)S(=O)(=O)C[C@@H](NC(=O)c1ccc(C)cc1)C(=O)N[C@@H](Cc2cc(F)cc(F)c2)[C@H](O)CNCc3cccc(CC)c3	CHEMBL412852	4			COC[C@H]1CCCN1C(=O)c2cc(C)cc(c2)C(=O)N[C@@H](Cc3cc(F)cc(F)c3)[C@H](O)[C@H]4CN(CCN4)S(=O)(=O)c5cccc(C)c5	CHEMBL1097342	7			CC(C)C[C@H](NC(=O)[C@@H](N)CCC(=O)O)C(=O)N[C@@H](CC(=O)O)C(=O)N[C@@H](CC(C)C)P(=O)(O)CC(C)C(=O)N[C@@H](C(C)C)C(=O)N[C@@H](CCC(=O)O)C(=O)N[C@@H](Cc1ccccc1)C(=O)O	CHEMBL242315	12			NC1=NC(C2=NOCCN12)(c3ccc(OC(F)(F)F)cc3)c4cccc(c4)c5cccnc5F	CHEMBL567430	30
CCCC(CCC)S(=O)(=O)C[C@@H](NC(=O)OCc1cccnc1)C(=O)N[C@@H](Cc2cc(F)cc(F)c2)[C@H](O)CNCc3cccc(CC)c3	CHEMBL414776	4			NC1=Nc2cnc3Oc4cccc(CCN(C5CCCCC5)C(=O)CC[C@@H](C6CCCCC6)N1Cc2c3)c4	CHEMBL1095431	7			COCC#Cc1cc(ccc1F)[C@]2(N=C(N)N(C)C2=O)c3ccc(OC(F)F)cc3	CHEMBL1270526	12			CCn1nnc2c(cc(cc12)C(=O)N[C@@H](Cc3ccccc3)[C@H](O)CNCc4cccc(c4)C(F)(F)F)N5CCCC5=O	CHEMBL449938	34
CCCCS(=O)(=O)C[C@@H](NC(=O)c1cc(C)[nH]n1)C(=O)N[C@@H](Cc2cc(F)cc(F)c2)[C@H](O)CNCc3cccc(CC)c3	CHEMBL409947	4			CCCCS(=O)(=O)CC(NC(=O)OCCC#N)C(=O)N[C@@H](Cc1cc(F)cc(F)c1)[C@H](O)CNCc2cccc(CC)c2	CHEMBL231864	8			CC(=O)N[C@H](Cc1cc(F)cc(F)c1)[C@@H](O)CNC2(CCc3nc(N)ncc3C2)c4cccc(c4)C(C)(C)C	CHEMBL609988	14			CN(c1cc(\C=C/C2CC2)cc(c1)C(=O)N[C@@H](Cc3ccccc3)[C@H](O)CNC4CC4)S(=O)(=O)C	CHEMBL201730	35
CCCCS(=O)(=O)C[C@@H](NC(=O)c1cnccn1)C(=O)N[C@@H](Cc2cc(F)cc(F)c2)[C@H](O)CNCc3cccc(CC)c3	CHEMBL409875	4			CC(=O)N[C@@H](Cc1cc(F)cc(F)c1)[C@H](O)CN[C@]2(CC\C(=N\O)\NC2)c3cccc(c3)C(C)(C)C	CHEMBL566603	8.8			CC(C)C[C@H](NC(=O)[C@@H](NC(=O)[C@@H](N)CNC(=O)c1nn[nH]n1)C(C)C)C(=O)N[C@@H](Cc2ccccc2)[C@@H](O)C(=O)Nc3cc(Cl)cc(Cl)c3	CHEMBL257587	14			CCc1cn(C)c2c(cc(cc12)C(=O)N[C@@H](Cc3ccccc3)[C@H](O)CNCc4cccc(c4)C(F)(F)F)N5CCCC5=O	CHEMBL508663	40
CCCCS(=O)(=O)C[C@@H](NC(=O)c1ncc[nH]1)C(=O)N[C@@H](Cc2cc(F)cc(F)c2)[C@H](O)CNCc3cccc(CC)c3	CHEMBL391144	4			O[C@@H]([C@H](Cc1ccccc1)NC(=O)c2cc(Br)cc(n2)C(=O)N3COC[C@@H]3c4ccc(F)cc4)C(=O)Nc5cccc(c5)c6nn[nH]n6	CHEMBL453211	9			COC[C@H]1CCCN1C(=O)c2cc(C)cc(c2)C(=O)N[C@@H](Cc3cc(F)cc(F)c3)[C@H](O)[C@H]4CN(CCN4)S(=O)(=O)Cc5ccccc5	CHEMBL1097353	14			CN1C(=NC(C2CCCCC2)(C1=O)c3cccc(NC(=O)c4occc4C)c3)N	CHEMBL590830	40
CCCCS(=O)(=O)C[C@@H](NC(=O)OC)C(=O)N[C@@H](Cc1cc(F)cc(F)c1)[C@H](O)CNCc2cccc(CC)c2	CHEMBL393733	4			CCc1cc(cc(CC)n1)[C@@]2(N=C(N)N(C)C2=O)c3cccc(c3)c4cccnc4F	CHEMBL598290	10			CCCCS(=O)(=O)C[C@@H](NC(=O)SC1CCOC1)C(=O)N[C@@H](Cc2cc(F)cc(F)c2)[C@H](O)CNCc3cccc(CC)c3	CHEMBL409948	15			CC(C)c1cccc(CNC[C@@H](O)[C@@H]2C[C@H](C)CCCCCCCCC(=O)N(C)[C@@H](C)C(=O)N2)c1	CHEMBL564010	45
CCCCS(=O)(=O)C[C@@H](NC(=O)OCC(F)(F)F)C(=O)N[C@@H](Cc1cc(F)cc(F)c1)[C@H](O)CNCc2cccc(CC)c2	CHEMBL231865	4			CCCCS(=O)(=O)C[C@@H](NC(=O)OCc1cccnc1)C(=O)N[C@@H](Cc2cc(F)cc(F)c2)[C@H](O)CNCc3cccc(CC)c3	CHEMBL409949	10			CCNc1cc(cc(N2CCCCS2(=O)=O)c1OC)C(=O)N[C@@H](Cc3ccccc3)[C@H](O)CNCc4cccc(c4)C(F)(F)F	CHEMBL501927	18			COCc1cc2cc(OCCCCOc3cccc(C[C@H](NC2=O)[C@H](O)CNC4(CC4)c5cccc(c5)C(C)C)c3)n1	CHEMBL595267	47
CN(C)S(=O)(=O)N(C)c1cc2COC(=O)[C@](C)(N)Cc3cccc(CC[C@@H](NC(=O)c(c2)c1)c4ccccc4)c3	CHEMBL427884	4			CCCN(c1cc2COC[C@](C)(N)Cc3cccc(CC[C@@H](NC(=O)c(c2)c1)c4ccc(F)cc4)c3)S(=O)(=O)C	CHEMBL429666	10			CC(=O)N[C@@H](Cc1cc(F)cc(F)c1)[C@H](O)CNC2(CCNC(=O)C2)c3cccc(c3)C(C)(C)C	CHEMBL570298	19			CCn1cc2CCS(=O)(=O)N(C)c3cc(cc1c23)C(=O)N[C@@H](Cc4ccccc4)C(=O)CNC5CCOCC5	CHEMBL558471	48
CC(C)C[C@H](NC(=O)[C@@H](NC(=O)[C@@H](N)CNC(=O)C(=O)O)C(C)C)C(=O)N[C@@H](Cc1ccccc1)[C@@H](O)C(=O)Nc2cc(cc(c2)C(=O)O)C(=O)O	CHEMBL181826	4.7			CC(C)C[C@H](NC(=O)[C@@H](NC(=O)[C@@H](N)CNC(=O)C1=C(F)C(=O)NC(=O)N1)C(C)C)C(=O)N[C@@H](Cc2ccccc2)[C@@H](O)C(=O)Nc3cccc(c3)C4=NOC(=S)N4	CHEMBL1094663	10.2			CC(C)c1cccc(CNC[C@@H](O)[C@@H]2Cc3cccc(OCCCCNc4cc(cc(c4)C(=O)N2)N5COC=C5)c3)c1	CHEMBL595065	19			O[C@@H]([C@H](Cc1ccccc1)NC(=O)C2=CC(=O)C=C(O2)C(=O)N3COC[C@@H]3c4ccccc4)C(=O)Nc5cccc(c5)c6nn[nH]n6	CHEMBL400043	50
CC(C)C[C@H](NC(=O)[C@@H](NC(=O)[C@@H](N)CNC(=O)c1nn[nH]n1)C(C)C)C(=O)N[C@@H](Cc2ccccc2)[C@@H](O)C(=O)Nc3cccc(c3)c4nn[nH]n4	CHEMBL381826	4.8			CC(C)C[C@H](NC(=O)c1cc(cc(c1)C(=O)NC(C)c2nc(C)oc2C)N(C)S(=O)(=O)C)[C@@H](O)C[C@@H](C)C(=O)N[C@@H](C(C)C)C(=O)NC(C)C	CHEMBL390159	10.3			C[C@@H](NC(=O)c1cc(cc(c1)c2oc(cc2)C(C)(N)Cc3ccccc3)N(C)S(=O)(=O)C)c4ccc(F)cc4	CHEMBL1092146	20			C[C@H](N)[C@H](Cc1ccsc1)NC(=O)c2cc(NCC3CC3C)nc(c2)N(C)S(=O)(=O)C	CHEMBL247596	54
CCCC(CCC)S(=O)(=O)C[C@@H](NC(=O)c1cccc(Cl)c1)C(=O)N[C@@H](Cc2cc(F)cc(F)c2)[C@H](O)CNCc3cccc(CC)c3	CHEMBL266565	5			CC(C)C[C@H](NC(=O)[C@@H](NC(=O)[C@@H](N)CNC(=O)c1cc(O)ccc1O)C(C)C)C(=O)N[C@@H](Cc2ccccc2)[C@@H](O)C(=O)Nc3cccc(c3)C4=NOC(=S)N4	CHEMBL1094664	10.6			CN1C(=N[C@](C1=O)(c2ccc(OC(F)F)cc2)c3cccc(c3)\C(=C/C4CC4)\F)N	CHEMBL1270527	20			CCCN(CCC)C(=O)c1cc(C)cc(c1)C(=O)N[C@@H](Cc2cc(F)cc(F)c2)[C@H](O)[C@H]3CN(CCN3)S(=O)(=O)c4cnc(C)n4C	CHEMBL1097331	57
CCCCS(=O)(=O)C[C@@H](NC(=O)c1ccncc1)C(=O)N[C@@H](Cc2cc(F)cc(F)c2)[C@H](O)CNCc3cccc(CC)c3	CHEMBL394271	5			C[C@H](NC[C@@H](O)[C@H](Cc1ccccc1)NC(=O)c2cccc(c2)N(c3cc(Cl)cc(Cl)c3)S(=O)(=O)C)C(=O)NC4CCCCC4	CHEMBL1210349	11			COC[C@H]1CCCN1C(=O)c2cc(C)cc(c2)C(=O)N[C@@H](Cc3cc(F)cc(F)c3)[C@H](O)[C@H]4C[C@H](CN4)Oc5ccccc5	CHEMBL403195	21			CN(C)c1ccc(NC(=O)Nc2cc(cc(c2)C(F)(F)F)C(F)(F)F)cc1C(=O)NCCCN3CCOCC3	CHEMBL370043	57.8
CCCCS(=O)(=O)C[C@@H](NC(=O)c1cnccc1O)C(=O)N[C@@H](Cc2cc(F)cc(F)c2)[C@H](O)CNCc3cccc(CC)c3	CHEMBL266531	5			C[C@]1(N)COCc2cc(cc(c2)C(=O)N[C@H](CCc3cccc(C1)c3)c4ccccc4)N(c5ccccc5)S(=O)(=O)C	CHEMBL248884	12			CC(C)c1ccc2OC(C)(C)C[C@H](NC[C@@H](O)[C@@H]3C[C@H](C)CCCCCCCCC(=O)N(C)[C@@H](C)C(=O)N3)c2c1	CHEMBL558488	24			CCNc1cc(cc(c1)C(=O)N[C@@H](Cc2cc(F)cc(F)c2)[C@H](O)[C@H]3CN(CCN3)S(=O)(=O)c4cccc(C)c4)N5CCCCS5(=O)=O	CHEMBL1097345	62
CCCN(c1cc2COC(=O)[C@](C)(N)Cc3cccc(CC[C@@H](NC(=O)c(c2)c1)c4ccccc4)c3)S(=O)(=O)C	CHEMBL400530	5			CC(=O)N[C@H](Cc1cc(F)cc(F)c1)[C@@H](O)CNC2(CCc3n[nH]cc3C2)c4cccc(c4)C(C)(C)C	CHEMBL609987	12			O[C@H](CNCc1cccc(c1)C(F)(F)F)[C@H](Cc2ccccc2)NC(=O)c3cccc(c3)N(c4cccnc4)S(=O)=O	CHEMBL1210352	25			COC1=C(F)C2CCC(Cc3ccc(cc3)C(F)(F)F)(C2C=C1)c4cn(C)c(N)n4	CHEMBL582982	63
CCCN(CCC)C(=O)c1cc(C)cc(c1)C(=O)N[C@@H](Cc2cc(F)cc(F)c2)[C@H](O)CNCc3cccc(I)c3	CHEMBL373533	5			CC(C)C[C@H](NC(=O)[C@@H](N)CCC(=O)O)C(=O)N[C@@H](CC(=O)O)C(=O)N[C@@H](CC(C)C)P(=O)(O)CC(C)C(=O)N[C@@H](C(C)C)C(=O)N[C@@H](CCC(=O)O)C(=O)N[C@@H](Cc1ccccc1)C(=O)O	CHEMBL242315	12			Cc1c(cccc1C(=O)N[C@@H](Cc2ccccc2)[C@H](O)CNCc3cccc(c3)C(F)(F)F)N(c4ccccc4)S(=O)(=O)C	CHEMBL1210354	26			COCCN(C[C@H]1C[C@@H]1C)c2cc(cc(n2)N(C)S(=O)(=O)C(C)C)C(=O)N[C@@H](Cc3ccccc3)[C@@H](N)COC	CHEMBL429477	66
CCNc1cc(cc(c1)C(=O)N[C@@H](Cc2ccccc2)[C@H](O)CNc3cccc(c3)C(F)(F)F)N4CCCCS4(=O)=O	CHEMBL1165545	5			COCC#Cc1cc(ccc1F)[C@]2(N=C(N)N(C)C2=O)c3ccc(OC(F)F)cc3	CHEMBL1270526	12			CC(C)c1cccc(CNC[C@@H](O)[C@@H]2Cc3cccc(OCCCCNc4cc(cc(C)n4)C(=O)N2)c3)c1	CHEMBL601681	27			COC[C@H]1CCCN1C(=O)c2cc(C)cc(c2)C(=O)N[C@@H](Cc3cc(F)cc(F)c3)[C@H](O)[C@H]4CN(CCN4)S(=O)(=O)c5ccc(Cl)s5	CHEMBL1097351	68
CC(C)[C@H](NC(=O)[C@@H](N)CNC(=O)C1=C(F)C(=O)NC(=O)N1)C(=O)N[C@@H](CC2CCCCC2)C(=O)N[C@@H](Cc3ccccc3)[C@@H](O)C(=O)Nc4cccc(c4)c5nn[nH]n5	CHEMBL255838	5.6			CS(=O)(=O)N(c1ccccc1)c2cc(cc(c2)c3ccccc3)C(=O)N[C@@H](Cc4ccccc4)[C@H](O)CNCc5cccc(c5)C(F)(F)F	CHEMBL1210362	13			CCn1ncc2c(cc(cc12)C(=O)N[C@@H](Cc3ccccc3)[C@H](O)CNCc4cccc(c4)C(F)(F)F)N5CCCC5=O	CHEMBL448592	28			CC[C@H](C)[C@H](NC(=O)C1CCCCO1)C(=O)N[C@@H](C)C(=O)N[C@@H](CC(C)C)[C@@H](O)CC(=O)N[C@@H](C(C)C)C(=O)NCc2cccc(c2)C(=O)O	CHEMBL1791017	69
CC(C)C[C@H](NC(=O)[C@H](CC(=O)O)NC(=O)[C@H](CC(C)C)NC(=O)[C@@H](N)CCC(=O)O)[C@@H](O)C[C@@H](C)C(=O)N[C@@H](C(C)C)C(=O)N[C@@H](CCC(=O)O)C(=O)N[C@@H](Cc1ccccc1)C(=O)O	CHEMBL390456	6			CC(=O)N[C@H](Cc1cc(F)cc(F)c1)[C@@H](O)CNC2(CCc3nc(N)ncc3C2)c4cccc(c4)C(C)(C)C	CHEMBL609988	14			CC(C)C[C@H](NC(=O)[C@@H](NC(=O)[C@@H](N)CNC(=O)c1nn[nH]n1)C(C)C)C(=O)N[C@@H](Cc2ccccc2)[C@@H](O)C(=O)NS(=O)(=O)C(F)(F)F	CHEMBL270172	29.9			CCCC[C@H](NC[C@@H]1Cc2cccc(CCCCc3cc(cc(c3)C(=O)N1)N(CCC)S(=O)(=O)C)c2)C(=O)NCC(C)C	CHEMBL385374	76
CCNc1cc(cc(c1)C(=O)N[C@@H](Cc2ccccc2)[C@H](O)CNC(C)(C)c3cccc(c3)C(F)(F)F)N4CCCCS4(=O)=O	CHEMBL510798	6			CC(C)C[C@H](NC(=O)[C@@H](NC(=O)[C@@H](N)CNC(=O)c1nn[nH]n1)C(C)C)C(=O)N[C@@H](Cc2ccccc2)[C@@H](O)C(=O)Nc3cc(Cl)cc(Cl)c3	CHEMBL257587	14			CN1C(=N[C@](C1=O)(c2ccc(OC(F)F)cc2)c3cccc(OCCC=C(F)F)c3)N	CHEMBL1270529	30			C[C@@]1(N)Cc2cccc(CC[C@@H](NC(=O)c3cc(COC1=O)cc(c3)c4ccccc4C#N)c5ccc(F)cc5)c2F	CHEMBL401181	78
CC(C)C[C@H](NC(=O)[C@@H](NC(=O)[C@@H](N)CCC(=O)O)C(C)C)C(=O)N[C@@H](Cc1ccccc1)[C@@H](O)C(=O)Nc2cc(cc(c2)c3nn[nH]n3)c4nn[nH]n4	CHEMBL205217	6.4			CCNc1cc(cc(c1)C(=O)N[C@@H](Cc2ccccc2)[C@H](O)CNC3(CCCCC3)c4cccc(OC)c4)N5CCCC5=O	CHEMBL403427	14			CN1C(=NC(C1=O)(c2ccsc2)c3ccc(F)c(c3)c4cccnc4F)N	CHEMBL1824357	30			C[C@H](Cc1cc2cc(ccc2nc1N)c3ncccc3Cl)C(=O)NCCC(C)(C)C	CHEMBL1821827	80
CC(C)C[C@H](NC(=O)[C@@H](NC(=O)[C@@H](N)CNC(=O)c1nn[nH]n1)C(C)C)C(=O)N[C@@H](Cc2ccccc2)[C@@H](O)C(=O)Nc3cccc(c3)c4noc(S)n4	CHEMBL208060	6.4			COC[C@H]1CCCN1C(=O)c2cc(C)cc(c2)C(=O)N[C@@H](Cc3cc(F)cc(F)c3)[C@H](O)[C@H]4CN(CCN4)S(=O)(=O)Cc5ccccc5	CHEMBL1097353	14			NC1=NC(C2=NOCCN12)(c3ccc(OC(F)(F)F)cc3)c4cccc(c4)c5cccnc5F	CHEMBL567430	30			CC(=O)N[C@@H](Cc1cc(F)cc(F)c1)[C@H](O)CN[C@]2(CC[C@H](Nc3cccs3)NC2)c4cccc(c4)C(C)(C)C	CHEMBL582817	85
CC(C)C[C@H](NC(=O)[C@@H](NC(=O)[C@@H](N)CNC(=O)C1=C(F)C(=O)NC(=O)N1)C(C)C)C(=O)N[C@@H](Cc2ccccc2)[C@@H](O)C(=O)Nc3cccc(c3)c4nn[nH]n4	CHEMBL380381	6.5			CCC(=O)c1cc(cs1)C2(N=C(N)N(C)C2=O)c3cccc(c3)c4cccnc4F	CHEMBL1824360	15			CCn1nnc2c(cc(cc12)C(=O)N[C@@H](Cc3ccccc3)[C@H](O)CNCc4cccc(c4)C(F)(F)F)N5CCCC5=O	CHEMBL449938	34			CCc1coc2c(cc(cc12)C(=O)N[C@@H](Cc3ccccc3)[C@H](O)CNCc4cccc(c4)C(F)(F)F)N5CCCC5=O	CHEMBL447120	87
CC(C)C[C@H](NC(=O)[C@@H](NC(=O)[C@@H](N)CNC(=O)c1nn[nH]n1)C(C)C)C(=O)N[C@@H](Cc2ccccc2)[C@@H](O)C(=O)Nc3cccc(c3)c4noc(O)n4	CHEMBL205333	6.6			CCC(=O)c1cc(cs1)C2(N=C(N)N(C)C2=O)c3cccc(c3)c4cncnc4	CHEMBL1824353	15			CC(C)C[C@H](NC(=O)[C@@H](NC(=O)[C@@H](N)CNC(=O)C1=C(F)C(=O)NC(=O)N1)C(C)C)C(=O)N[C@@H](Cc2ccccc2)[C@@H](O)C(=O)N[C@H](C)c3ccccc3	CHEMBL1817733	34.8			C[C@@H](NC(=O)c1cc2OCCCCc2c(c1)C(=O)N[C@@H](Cc3ccccc3)[C@H](O)CNC4CC4)c5ccccc5	CHEMBL464918	89
C[C@@H](NC(=O)c1cc(cc(c1)c2oc(cn2)[C@](C)(N)Cc3ccccc3)N(C)S(=O)(=O)C)c4ccc(F)cc4	CHEMBL1096683	7			CCCCS(=O)(=O)C[C@@H](NC(=O)SC1CCOC1)C(=O)N[C@@H](Cc2cc(F)cc(F)c2)[C@H](O)CNCc3cccc(CC)c3	CHEMBL409948	15			CN(c1cc(\C=C/C2CC2)cc(c1)C(=O)N[C@@H](Cc3ccccc3)[C@H](O)CNC4CC4)S(=O)(=O)C	CHEMBL201730	35			CN1C(=NC(C1=O)(c2cccc(c2)c3cccnc3)c4ccc5OCCOc5c4)N	CHEMBL584917	90
COC[C@H]1CCCN1C(=O)c2cc(C)cc(c2)C(=O)N[C@@H](Cc3cc(F)cc(F)c3)[C@H](O)[C@H]4CN(CCN4)S(=O)(=O)c5cccc(C)c5	CHEMBL1097342	7			Cl.CS(=O)(=O)N(c1ccncc1)c2cccc(c2)C(=O)N[C@@H](Cc3ccccc3)[C@H](O)CNCc4cccc(c4)C(F)(F)F	CHEMBL1210357	15			CS(=O)(=O)N(c1ccccc1)c2cc(cc(c2)C(=O)N[C@@H](Cc3ccccc3)[C@H](O)CNCc4cccc(c4)C(F)(F)F)N5CCCC5=O	CHEMBL1210363	35			CN1C(=NC(C1=O)(c2ccsc2)c3cccc(c3)c4cnccn4)N	CHEMBL1824359	90
NC1=Nc2cnc3Oc4cccc(CCN(C5CCCCC5)C(=O)CC[C@@H](C6CCCCC6)N1Cc2c3)c4	CHEMBL1095431	7			CC(C)C[C@H](NC(=O)[C@H](CC(=O)N)NC(=O)[C@@H](NC(=O)[C@@H](N)CCC(=O)O)C(C)C)[C@@H](O)[C@@H]1CCC[C@H]1C(=O)N[C@@H](C)C(=O)N[C@@H](CCC(=O)O)C(=O)N[C@@H](Cc2ccccc2)C(=O)O	CHEMBL434943	16			COc1cc2N=C(N)N3Cc2cc1Oc4cccc(CCN(C5CCCCC5)C(=O)CC[C@H]3C6CCCCC6)c4	CHEMBL1095430	36			CS(=O)(=O)Oc1cc(nc(c1)C(=O)N2COC[C@@H]2c3ccccc3)C(=O)N[C@@H](Cc4ccccc4)[C@H](O)C(=O)Nc5cccc(c5)c6nn[nH]n6	CHEMBL399840	96
CC(C)C[C@H](NC(=O)[C@@H](NC(=O)[C@@H](N)CNC(=O)C1=C(F)C(=O)NC(=O)N1)C(C)C)C(=O)N[C@@H](Cc2ccccc2)[C@@H](O)C(=O)Nc3cccc(c3)C4=NOC(=O)N4	CHEMBL1094659	7.9			CN(c1cc2COC(=O)[C@](C)(N)Cc3cccc(CC[C@@H](NC(=O)c(c2)c1)c4ccccc4)c3)S(=O)(=O)CC(F)(F)F	CHEMBL402921	16			CC(C)[C@H](NC(=O)C[C@H](O)[C@@H](COCc1cc(F)cc(F)c1)NC(=O)c2cc(cc(c2)C(=O)N[C@@H](C)c3ccccc3)N(C)S(=O)(=O)C)C(=O)Nc4cc(cc(c4)C(=O)O)C(=O)O	CHEMBL504140	40			CCOCCCNC(=O)c1cc(NC(=O)Nc2cccc(Cl)c2)ccc1N(C)C	CHEMBL190644	97
C[C@@H](NC(=O)c1cc(cc(c1)C(=O)N[C@@H](Cc2cc(F)cc(F)c2)[C@H](O)[C@H]3CN(CCN3)S(=O)(=O)c4cccc(C)c4)N5CCCCS5(=O)=O)c6ccccc6	CHEMBL1097344	8			COc1cccc(CNC[C@@H](O)[C@H](Cc2cc(F)cc(F)c2)NC(=O)c3cc(cc(c3)C(=O)C)N(c4ccccc4)S(=O)(=O)C)c1	CHEMBL541172	17			CC(C)C[C@H](NC(=O)[C@H](CC(=O)N)NC(=O)[C@@H](NC(=O)[C@@H](N)CCC(=O)O)C(C)C)[C@@H](O)[C@@H]1CCC[C@H]1C(=O)N[C@@H](C)C(=O)N[C@@H](CCC(=O)O)C(=O)O	CHEMBL363783	40			CON[C@H]1CC[C@@](CN1)(NC[C@@H](O)[C@H](Cc2cc(F)cc(F)c2)NC(=O)C)c3cccc(c3)C(C)(C)C	CHEMBL570982	100
C[C@H](NC[C@@H](O)[C@H](Cc1ccccc1)NC(=O)c2cccc(c2)N(c3cccc(c3)C#N)S(=O)(=O)C)C(=O)NC4CCCCC4	CHEMBL1210344	8			C[C@H](Cc1cc2cc(ccc2nc1N)c3ccccc3C)C(=O)N[C@@H]4CCOC(C)(C)C4	CHEMBL1821728	18			CCc1cn(C)c2c(cc(cc12)C(=O)N[C@@H](Cc3ccccc3)[C@H](O)CNCc4cccc(c4)C(F)(F)F)N5CCCC5=O	CHEMBL508663	40			CCN(CCCCCCNC1=CC(=O)C(=CC1=O)NCCCCCCN(CC)Cc2ccccc2OC)Cc3ccccc3OC	CHEMBL231160	108
CCc1cn2CCS(=O)(=O)N(C)c3cc(cc1c23)C(=O)N[C@@H](Cc4ccccc4)[C@H](O)CNCCC(F)(F)F	CHEMBL560092	8			CCNc1cc(cc(N2CCCCS2(=O)=O)c1OC)C(=O)N[C@@H](Cc3ccccc3)[C@H](O)CNCc4cccc(c4)C(F)(F)F	CHEMBL501927	18			CCNc1cc(cc(c1)C(=O)N[C@@H](Cc2ccccc2)[C@H](O)CNCc3cncc(c3)C#N)N4CCCCS4(=O)=O	CHEMBL502289	40			CC(=O)N[C@@H](Cc1cc(F)cc(F)c1)[C@H](O)CNC2(CCCCC2)c3cccc(c3)c4cscn4	CHEMBL1209055	110
CCc1cn2CCS(=O)(=O)Oc3cc(cc1c23)C(=O)N[C@@H](Cc4ccccc4)[C@@H](O)CNCc5cccc(c5)C(F)(F)F	CHEMBL554146	8			COc1cccc(c1)N(c2cccc(c2)C(=O)N[C@@H](Cc3ccccc3)[C@H](O)CN[C@@H](C)C(=O)NC4CCCCC4)S(=O)(=O)C	CHEMBL1210343	18			CN1C(=NC(C2CCCCC2)(C1=O)c3cccc(NC(=O)c4occc4C)c3)N	CHEMBL590830	40			CCCCCOc1ccc(cc1)c2ccc(c3ccccc3Cl)n2Cc4ccc(OCCO)c(N)n4	CHEMBL1093807	110
CCc1cn2CS(=O)(=O)N(C)c3cc(cc1c23)C(=O)N[C@@H](Cc4ccccc4)[C@H](O)CNCc5cccc(OC)c5	CHEMBL556747	8			CC(=O)N[C@@H](Cc1cc(F)cc(F)c1)[C@H](O)CNC2(CCNC(=O)C2)c3cccc(c3)C(C)(C)C	CHEMBL570298	19			CC(=O)N[C@@H](Cc1cc(F)cc(F)c1)[C@H](O)CNC2(CCCCC2)c3cccc(c3)c4ccsc4	CHEMBL1208999	44			CCCC(CCC)S(=O)(=O)CC(NC(=O)OCc1ccccc1)C(=O)N[C@@H](Cc2ccccc2)[C@H](O)CNCc3cccc(OC)c3	CHEMBL253800	112
CCCCS(=O)(=O)CC(NC(=O)OCCC#N)C(=O)N[C@@H](Cc1cc(F)cc(F)c1)[C@H](O)CNCc2cccc(CC)c2	CHEMBL231864	8			CC(C)c1cccc(CNC[C@@H](O)[C@@H]2Cc3cccc(OCCCCNc4cc(cc(c4)C(=O)N2)N5COC=C5)c3)c1	CHEMBL595065	19			CC(C)c1cccc(CNC[C@@H](O)[C@@H]2C[C@H](C)CCCCCCCCC(=O)N(C)[C@@H](C)C(=O)N2)c1	CHEMBL564010	45			CCN(Cc1ccccc1)Cc2ccc(cc2)C3=Cc4ccc(OCCNC(=O)CCc5ccc(F)c(F)c5)cc4OC3=O	CHEMBL271710	114
CC(C)C[C@H](NC(=O)[C@@H](NC(=O)[C@@H](N)CNC(=O)c1nn[nH]n1)C(C)C)C(=O)N[C@@H](Cc2ccccc2)[C@@H](O)C(=O)Nc3cccc(c3)C(=O)O	CHEMBL183494	8.2			CCn1cnc2c(cc(cc12)C(=O)N[C@@H](Cc3ccccc3)[C@H](O)CNCc4cccc(c4)C(F)(F)F)N5CCCC5=O	CHEMBL500555	19			COCc1cc2cc(OCCCCOc3cccc(C[C@H](NC2=O)[C@H](O)CNC4(CC4)c5cccc(c5)C(C)C)c3)n1	CHEMBL595267	47			CC(=O)N[C@@H](Cc1cc(F)cc(F)c1)[C@H](O)CNC2(CCCCC2)c3onc(CC(C)(C)C)c3	CHEMBL1258687	139
CC(=O)N[C@@H](Cc1cc(F)cc(F)c1)[C@H](O)CN[C@]2(CC\C(=N\O)\NC2)c3cccc(c3)C(C)(C)C	CHEMBL566603	8.8			C[C@@H](NC(=O)c1cc(cc(c1)c2oc(cc2)C(C)(N)Cc3ccccc3)N(C)S(=O)(=O)C)c4ccc(F)cc4	CHEMBL1092146	20			CC(=O)N[C@@H](Cc1cc(F)cc(F)c1)[C@H](O)CNC2(CCC(=C)NC2)c3cccc(c3)C(C)(C)C	CHEMBL584547	48			COC[C@H]1CCCN1C(=O)c2cncc(c2)C(=O)N[C@@H](Cc3cc(F)cc(F)c3)[C@H](O)[C@@H]4NCCN(Cc5ccccc5)C4=O	CHEMBL511110	140
COc1cccc(CNC[C@@H](O)[C@H](Cc2cc(F)cc(F)c2)NC(=O)c3cc(cc(c3)\C(=N/OCc4ccccc4)\C)N(C)S(=O)(=O)C)c1	CHEMBL550271	9			CCNc1cc(cc(c1)C(=O)N[C@@H](Cc2ccccc2)[C@H](O)CNCc3cccc(OC(F)(F)F)c3)N4CCCC4=O	CHEMBL402348	20			CCn1cc2CCS(=O)(=O)N(C)c3cc(cc1c23)C(=O)N[C@@H](Cc4ccccc4)C(=O)CNC5CCOCC5	CHEMBL558471	48			CCN(Cc1ccccc1)Cc2ccc(cc2)C3=Cc4ccc(OCCNC(=O)\C=C\c5ccc(Cl)c(Cl)c5)cc4OC3=O	CHEMBL270248	151
O[C@@H]([C@H](Cc1ccccc1)NC(=O)c2cc(Br)cc(n2)C(=O)N3COC[C@@H]3c4ccc(F)cc4)C(=O)Nc5cccc(c5)c6nn[nH]n6	CHEMBL453211	9			CN1C(=N[C@](C1=O)(c2ccc(OC(F)F)cc2)c3cccc(c3)\C(=C/C4CC4)\F)N	CHEMBL1270527	20			CC(C)S(=O)(=O)N(C)c1cc(cc(NC[C@H]2C[C@@H]2C)n1)C(=O)N[C@@H](Cc3ccccc3)[C@@H](N)CF	CHEMBL230245	49			CC(=O)N[C@@H](Cc1cc(F)cc(F)c1)[C@H](O)CNC2(CCCCC2)c3cn(C[Si](C)(C)C)nn3	CHEMBL1257184	154
C[C@H](NC[C@@H](O)[C@H](Cc1ccccc1)NC(=O)c2cccc(c2)N(c3ccc(Cl)cc3)S(=O)(=O)C)C(=O)NC4CCCCC4	CHEMBL1210347	10			COC\C=C\c1cccc(c1)[C@]2(N=C(N)N(C)C2=O)c3ccc(OC(F)F)cc3	CHEMBL1270628	20			CN1C(=NC(C1=O)(c2cccc(c2)c3cccnc3F)c4cnn(CCF)c4)N	CHEMBL1824337	50			CCCCNC(=O)[C@H](C)C[C@H](O)[C@@H]1CSC\C=C\CS[C@H]2CCCN[C@H]2C(=O)N[C@@H](C)C(=O)N1	CHEMBL210240	190
CC(C)C[C@H](NC(=O)[C@@H](NC(=O)[C@@H](N)CNC(=O)c1cc(O)ccc1O)C(C)C)C(=O)N[C@@H](Cc2ccccc2)[C@@H](O)C(=O)Nc3cccc(c3)C4=NOC(=O)N4	CHEMBL1094660	10			COc1ccc(cc1C)C2(N=C(N)N(C)C2=O)c3ccc(F)c(c3)c4cncnc4	CHEMBL567688	20			O[C@@H]([C@H](Cc1ccccc1)NC(=O)C2=CC(=O)C=C(O2)C(=O)N3COC[C@@H]3c4ccccc4)C(=O)Nc5cccc(c5)c6nn[nH]n6	CHEMBL400043	50			NC1=NC(C2=NCCCN12)(c3ccc4OCCOc4c3)c5cccc(c5)c6cccnc6F	CHEMBL566968	190
CCc1cc(cc(CC)n1)[C@@]2(N=C(N)N(C)C2=O)c3cccc(c3)c4cccnc4F	CHEMBL598290	10			COCC\C=C\c1cccc(c1)[C@]2(N=C(N)N(C)C2=O)c3ccc(OC(F)F)cc3	CHEMBL1270629	20			CCCN(c1cc2COC[C@](C)(N)Cc3cccc(CC[C@@H](NC(=O)c(c2)c1)C#C)c3)S(=O)(=O)C	CHEMBL248876	53			CC(=O)N[C@@H](Cc1cc(F)cc(F)c1)[C@H](O)CN[C@]2(CC[C@@H](NC2)S(=O)(=O)C)c3cccc(c3)C(C)(C)C	CHEMBL567026	210
CCCCNC(=O)[C@@H](NC(=O)[C@@H]1CC(=O)C[C@H]1[C@H](O)[C@H](CC(C)C)NC(=O)[C@H](CCSC)NC(=O)[C@H](CC(C)C)NC(=O)C)C(C)C	CHEMBL191129	10			COCCC#Cc1cccc(c1)[C@]2(N=C(N)N(C)C2=O)c3ccc(OC(F)F)cc3	CHEMBL1271452	20			C[C@H](N)[C@H](Cc1ccsc1)NC(=O)c2cc(NCC3CC3C)nc(c2)N(C)S(=O)(=O)C	CHEMBL247596	54			CCS(=O)(=O)c1cc(cc(c1)C(=O)N[C@@H](Cc2ccccc2)[C@H](O)CNCc3cccc(c3)C(F)(F)F)N(c4ccccc4)S(=O)(=O)C	CHEMBL1210364	220
CCCCNC(=O)[C@@H](NC(=O)[C@H]1[C@@H](CC(=O)N1C)[C@H](O)[C@H](CC(C)C)NC(=O)[C@H](CCSC)NC(=O)[C@H](CC(C)C)NC(=O)C)C(C)C	CHEMBL436104	10			COC[C@H]1CCCN1C(=O)c2cc(C)cc(c2)C(=O)N[C@@H](Cc3cc(F)cc(F)c3)[C@H](O)[C@H]4C[C@H](CN4)Oc5ccccc5	CHEMBL403195	21			CCCN(CCC)C(=O)c1cc(Oc2ccccc2OC)cc(c1)C(=O)N[C@@H](Cc3cc(F)cc(F)c3)[C@@H](O)CNCc4cccc(OC)c4	CHEMBL557278	54			CCNc1cc(cc(c1)C(=O)N[C@@H](Cc2ccccc2)[C@H](O)CNCc3cnn(CC)c3)N4CCCC4=O	CHEMBL402171	230
CCCCS(=O)(=O)C[C@@H](NC(=O)C1CC1)C(=O)N[C@@H](Cc2cc(F)cc(F)c2)[C@H](O)CNCc3cccc(CC)c3	CHEMBL231669	10			CCCCS(=O)(=O)C[C@@H](NC(=O)COC)C(=O)N[C@@H](Cc1cc(F)cc(F)c1)[C@H](O)CNCc2cccc(CC)c2	CHEMBL398775	22			CCCN(CCC)C(=O)c1cc(C)cc(c1)C(=O)N[C@@H](Cc2cc(F)cc(F)c2)[C@H](O)[C@H]3CN(CCN3)S(=O)(=O)c4cnc(C)n4C	CHEMBL1097331	57			CCN(Cc1ccccc1)Cc2ccc(cc2)C3=Cc4cc(OC)c(OC)cc4OC3=O	CHEMBL244416	238
CCCCS(=O)(=O)C[C@@H](NC(=O)OCc1cccnc1)C(=O)N[C@@H](Cc2cc(F)cc(F)c2)[C@H](O)CNCc3cccc(CC)c3	CHEMBL409949	10			CC(C)CNC(=O)[C@H](C)NC[C@H](Cc1ccccc1)NC(=O)c2cc(CCC3C[C@@H]3C)cc(c2)N(C)S(=O)(=O)C	CHEMBL210414	23			COC[C@H]1CCCN1C(=O)c2cc(OC)cc(c2)C(=O)N[C@@H](Cc3cc(F)cc(F)c3)[C@H](O)[C@@H]4NCCN(Cc5ccccc5)C4=O	CHEMBL453413	57			CC(C)S[C@H](NC(=O)[C@@H](C[C@H](O)[C@@H]1COCc2cccc(c2)C(NC(=O)c3cc(cc(c3)C(=O)N1)N(C)S(=O)(=O)C)c4ccccc4)C(C)C)C(=O)NCc5ccccc5	CHEMBL1644463	240
CCCN(c1cc2COC[C@](C)(N)Cc3cccc(CC[C@@H](NC(=O)c(c2)c1)c4ccc(F)cc4)c3)S(=O)(=O)C	CHEMBL429666	10			CCn1ccc2c(cc(cc12)C(=O)N[C@@H](Cc3ccccc3)[C@H](O)CNCc4cccc(c4)C(F)(F)F)N5CCCC5=O	CHEMBL501338	23			CCC[C@H](NC(=O)OC(C)(C)C)C(=O)N[C@@H](CCSC)C(=O)N[C@@H](Cc1ccccc1)[C@@H](O)C[C@@H](C)C(=O)N[C@@H](C(C)C)C(=O)NCc2ccncc2	CHEMBL81037	60			CCc1cn2CCS(=O)(=O)N(CC(F)(F)F)c3cc(cc1c23)C(=O)N[C@H](Cc4ccccc4)[C@H](O)CNC5CCOCC5	CHEMBL537300	248
CCCN(CCC)C(=O)c1cc(Oc2ccccc2)cc(c1)C(=O)N[C@@H](Cc3cc(F)cc(F)c3)[C@@H](O)CNCc4cccc(OC)c4	CHEMBL539976	10			CCNc1cc(cc(N2CCCCS2(=O)=O)c1C)C(=O)N[C@@H](Cc3ccccc3)[C@H](O)CNCc4cccc(c4)C(F)(F)F	CHEMBL508753	23			CCNc1cc(cc(c1)C(=O)N[C@@H](Cc2cc(F)cc(F)c2)[C@H](O)[C@H]3CN(CCN3)S(=O)(=O)c4cccc(C)c4)N5CCCCS5(=O)=O	CHEMBL1097345	62			CCOc1cc(cc(c1)C2=C(C)CCC2=O)C(=O)N[C@@H](Cc3ccccc3)[C@H](O)CNCc4cccc(c4)C(F)(F)F	CHEMBL400654	250
CN1C(=N[C@](C1=O)(c2ccc(OC(F)F)cc2)c3ccc(F)c(OCCCF)c3)N	CHEMBL1270029	10			CC(C)c1ccc2OC(C)(C)C[C@H](NC[C@@H](O)[C@@H]3C[C@H](C)CCCCCCCCC(=O)N(C)[C@@H](C)C(=O)N3)c2c1	CHEMBL558488	24			C[C@@H](NC(=O)c1cc(cc2OCCCc12)C(=O)N[C@@H](Cc3ccccc3)[C@H](O)CNC4CC4)c5ccccc5	CHEMBL473854	63			CCCOc1ccc(cc1)c2ccc(c3ccccc3Cl)n2CC(=O)\N=C(\N)/NCCC4OCCO4	CHEMBL272718	269
CN1C(=N[C@](C1=O)(c2ccc(OC(F)F)cc2)c3cccc(c3)C#CCCCCO)N	CHEMBL1269921	10			O[C@@H]([C@H](Cc1ccccc1)NC(=O)c2cc(I)cc(n2)C(=O)N3COC[C@@H]3c4ccccc4)C(=O)Nc5cccc(c5)c6nn[nH]n6	CHEMBL504917	24			COC1=C(F)C2CCC(Cc3ccc(cc3)C(F)(F)F)(C2C=C1)c4cn(C)c(N)n4	CHEMBL582982	63			C[C@@]1(N)Cc2cccc(CC[C@@H](NC(=O)c3cc(Br)cc(COC1=O)c3)c4ccccc4)c2	CHEMBL251118	270
CN1C(=N[C@](C1=O)(c2ccc(OC(F)F)cc2)c3cccc(c3)C#CCCF)N	CHEMBL1271141	10			O[C@H](CNCc1cccc(c1)C(F)(F)F)[C@H](Cc2ccccc2)NC(=O)c3cccc(c3)N(c4cccnc4)S(=O)=O	CHEMBL1210352	25			COC[C@H]1CCCN1C(=O)c2cc(C)cc(c2)C(=O)N[C@@H](Cc3cc(F)cc(F)c3)[C@H](O)[C@H]4CN(CCN4)S(=O)(=O)c5ccc(Cl)s5	CHEMBL1097351	68			CC(=O)N[C@@H](Cc1cc(F)cc(F)c1)[C@H](O)CNC2(CCCOC2)c3cccc(c3)n4cccn4	CHEMBL572313	270
CN1C(=N[C@](C1=O)(c2ccc(OC(F)F)cc2)c3cccc(c3)C#CCCO)N	CHEMBL1271453	10			Cc1c(cccc1C(=O)N[C@@H](Cc2ccccc2)[C@H](O)CNCc3cccc(c3)C(F)(F)F)N(c4ccccc4)S(=O)(=O)C	CHEMBL1210354	26			CC[C@H](C)[C@H](NC(=O)C1CCCCO1)C(=O)N[C@@H](C)C(=O)N[C@@H](CC(C)C)[C@@H](O)CC(=O)N[C@@H](C(C)C)C(=O)NCc2cccc(c2)C(=O)O	CHEMBL1791017	69			Cc1csc(CN\C(=N/C(=O)Cn2c(ccc2C34CC5CC(CC(C5)C3)C4)c6ccccc6)\N)n1	CHEMBL404166	276
CN1C(=N[C@](C1=O)(c2ccc(OC(F)F)cc2)c3cccc(c3)C#CCF)N	CHEMBL1271037	10			CCn1cc2CCS(=O)(=O)N(C)c3cc(cc1c23)C(=O)N[C@@H](Cc4ccccc4)[C@@H](O)CNCC#C	CHEMBL554281	26			CN1C(=NC(C1=O)(c2ccncc2)c3cccc(c3)c4cnccn4)N	CHEMBL1090026	70			CCOc1cc(cc(c1)c2ccccc2C(=O)C)C(=O)N[C@@H](Cc3ccccc3)[C@H](O)CNCc4cccc(c4)C(F)(F)F	CHEMBL401067	280
COc1ccc(cc1C)[C@]2(N=C(N)N(C)C2=O)c3ccc(F)c(c3)c4cccnc4F	CHEMBL567477	10			CC(C)c1cccc(CNC[C@@H](O)[C@@H]2Cc3cccc(OCCCCNc4cc(cc(C)n4)C(=O)N2)c3)c1	CHEMBL601681	27			CC(=O)N[C@@H](Cc1cc(F)cc(F)c1)[C@H](O)CN[C@]2(CC[C@H](Nc3ccccn3)NC2)c4cccc(c4)C(C)(C)C	CHEMBL571433	73			Nc1cccc(Cn2c(ccc2c3ccccc3Cl)c4ccc(Oc5cccs5)cc4)n1	CHEMBL1092913	290
O[C@@H]([C@H](Cc1ccccc1)NC(=O)c2cc(I)cc(n2)C(=O)N3COC[C@@H]3c4ccc(F)cc4)C(=O)Nc5cccc(c5)c6nn[nH]n6	CHEMBL507541	10			CCn1ncc2c(cc(cc12)C(=O)N[C@@H](Cc3ccccc3)[C@H](O)CNCc4cccc(c4)C(F)(F)F)N5CCCC5=O	CHEMBL448592	28			C[C@@]1(N)Cc2cccc(CC[C@@H](NC(=O)c3cc(COC1=O)cc(c3)c4ccccc4C#N)c5ccc(F)cc5)c2F	CHEMBL401181	78			CC(C)C[C@H](NC(=O)[C@@H](C[C@@H](O)[C@H](Cc1ccccc1)NC(=O)OC(C)(C)C)Cc2ccccc2)C(=O)N[C@@H](Cc3ccccc3)C(=O)N	CHEMBL302004	300
CCc1cn2CCS(=O)(=O)N(C)c3cc(cc1c23)C(=O)N[C@@H](Cc4ccccc4)[C@H](O)CNCc5cccc(c5)C(F)(F)F.OC=O	CHEMBL446972	10.19			CSCC[C@H](NC(=O)[C@@H](NC(=O)OC(C)(C)C)C(C)C)C(=O)N[C@@H](Cc1ccccc1)[C@@H](O)C[C@@H](C)C(=O)N[C@@H](C(C)C)C(=O)NCc2ccccc2	CHEMBL312277	28			C[C@H](Cc1cc2cc(ccc2nc1N)c3ncccc3Cl)C(=O)NCCC(C)(C)C	CHEMBL1821827	80			CCNc1cc(cc(c1)C(=O)N[C@@H](Cc2ccccc2)[C@H](O)CNCc3cccc(OC)n3)N4CCCC4=O	CHEMBL254138	330
CC(C)C[C@H](NC(=O)[C@@H](NC(=O)[C@@H](N)CNC(=O)C1=C(F)C(=O)NC(=O)N1)C(C)C)C(=O)N[C@@H](Cc2ccccc2)[C@@H](O)C(=O)Nc3cccc(c3)C4=NOC(=S)N4	CHEMBL1094663	10.2			CC(C)C[C@H](NC(=O)[C@@H](NC(=O)[C@@H](N)CNC(=O)c1nn[nH]n1)C(C)C)C(=O)N[C@@H](Cc2ccccc2)[C@@H](O)C(=O)NS(=O)(=O)C(F)(F)F	CHEMBL270172	29.9			CN1C(=N[C@](C1=O)(c2ccc(OC(F)F)cc2)c3cccc(c3)C(F)CCCF)N	CHEMBL1270336	80			CCc1cn2CCCS(=O)(=O)Nc3cc(cc1c23)C(=O)N[C@@H](Cc4ccccc4)[C@H](O)CNc5ccc(OC)cc5	CHEMBL553938	339
CC(C)C[C@H](NC(=O)c1cc(cc(c1)C(=O)NC(C)c2nc(C)oc2C)N(C)S(=O)(=O)C)[C@@H](O)C[C@@H](C)C(=O)N[C@@H](C(C)C)C(=O)NC(C)C	CHEMBL390159	10.3			CCc1cc(cc(CC)n1)[C@@]2(N=C(N)N(C)C2=O)c3cccc(c3)c4cncnc4	CHEMBL590730	30			NC1=NC(C2=NCCN12)(c3ccc(OC(F)(F)F)cc3)c4cccc(c4)c5cccnc5F	CHEMBL566112	80			C(CN1CCCCC1)C2CCc3cc(OCc4ccc(cc4)c5ccccc5)ccc3C2	CHEMBL142715	350
CC(C)C[C@H](NC(=O)[C@@H](NC(=O)[C@@H](N)CNC(=O)c1cc(O)ccc1O)C(C)C)C(=O)N[C@@H](Cc2ccccc2)[C@@H](O)C(=O)Nc3cccc(c3)C4=NOC(=S)N4	CHEMBL1094664	10.6			CCCC#Cc1cc(ccc1F)[C@]2(N=C(N)N(C)C2=O)c3ccc(OC(F)F)c(C)c3	CHEMBL1270834	30			CC(C)C[C@H](NC(=O)[C@@H](NC(=O)[C@@H](N)CNC(=O)O)C(C)C)C(=O)N[C@@H](Cc1ccccc1)[C@@H](O)C(=O)N[C@@H](CC(=O)O)C(=O)N[C@@H](C)C(=O)N[C@@H](CCC(=O)O)C(=O)O	CHEMBL39360	84			CC(=O)N[C@@H](Cc1cc(F)cc(F)c1)[C@H](O)CNC2(CC2)c3cnn(CC(C)(C)C)c3	CHEMBL1258002	350
C[C@H](NC[C@@H](O)[C@H](Cc1ccccc1)NC(=O)c2cccc(c2)N(c3cc(Cl)cc(Cl)c3)S(=O)(=O)C)C(=O)NC4CCCCC4	CHEMBL1210349	11			CN1C(=N[C@](C1=O)(c2ccc(OC(F)F)cc2)c3cccc(OCCC=C(F)F)c3)N	CHEMBL1270529	30			CC(=O)N[C@@H](Cc1cc(F)cc(F)c1)[C@H](O)CN[C@]2(CC[C@H](Nc3cccs3)NC2)c4cccc(c4)C(C)(C)C	CHEMBL582817	85			COc1cc2O[C@@H](CC(=O)c2c(O)c1C)c3ccc(OC)c(c3)c4c(O)cc(O)c5C(=O)C=C(Oc45)c6ccc(O)cc6	CHEMBL1208905	350
CCCC(Cc1cc2cc(ccc2nc1N)c3ccccc3C)C(=O)NCC4CCCCC4	CHEMBL1821819	11			CN1C(=NC(C1=O)(c2ccsc2)c3ccc(F)c(c3)c4cccnc4F)N	CHEMBL1824357	30			CCc1coc2c(cc(cc12)C(=O)N[C@@H](Cc3ccccc3)[C@H](O)CNCc4cccc(c4)C(F)(F)F)N5CCCC5=O	CHEMBL447120	87			CCc1cn2CCS(=O)(=O)Oc3cc(cc1c23)C(=O)N[C@@H](Cc4ccccc4)[C@@H](O)CNCC#C	CHEMBL558078	360
CCCCS(=O)(=O)C[C@@H](NC(=O)OCc1ccncc1)C(=O)N[C@@H](Cc2cc(F)cc(F)c2)[C@H](O)CNCc3cccc(CC)c3	CHEMBL409950	11			COc1ccc(cc1)[C@@]2(N=C(N)N(C)C2=O)c3cccc(c3)c4cccnc4F	CHEMBL1271344	30			C[C@@H](NC(=O)c1cc2OCCCCc2c(c1)C(=O)N[C@@H](Cc3ccccc3)[C@H](O)CNC4CC4)c5ccccc5	CHEMBL464918	89			CCNc1cc(N2CCCCS2(=O)=O)c(F)c(c1)C(=O)N[C@@H](Cc3ccccc3)[C@H](O)CNCc4cnn(CC)c4	CHEMBL254485	361
COc1ccc(cc1)N(c2cccc(c2)C(=O)N[C@@H](Cc3ccccc3)[C@H](O)CN[C@@H](C)C(=O)NC4CCCCC4)S(=O)(=O)C	CHEMBL1210345	11			NC1=NC(C2=NOCCN12)(c3ccc(OC(F)(F)F)cc3)c4cccc(c4)c5cccnc5F	CHEMBL567430	30			CN1C(=NC(C1=O)(c2cccc(c2)c3cccnc3)c4ccc5OCCOc5c4)N	CHEMBL584917	90			CN1C(=NC(C2CCCCC2)(C1=O)c3cccc(NC(=O)c4ccc5OCOc5c4)c3)N	CHEMBL605518	380
CC(C)C[C@H](NC(=O)[C@@H](NC(=O)[C@@H](N)CNC(=O)C1=C(F)C(=O)NC(=O)N1)C(C)C)C(=O)N[C@@H](Cc2ccccc2)[C@@H](O)C(=O)NC3(CCCC3)c4ccccc4	CHEMBL1817745	11.6			CCCCCOc1cc(cc(c1)C(=O)N[C@@H](Cc2ccccc2)[C@H](O)CN[C@@H](C)C(=O)NC3CCCCC3)N4CCCC4=O	CHEMBL256399	32			CN1C(=NC(C1=O)(c2ccsc2)c3cccc(c3)c4cnccn4)N	CHEMBL1824359	90			CCCN(CCC)C(=O)c1cc(cc(c1)S(=O)(=O)c2ccc(OC)cc2)C(=O)N[C@@H](Cc3cc(F)cc(F)c3)[C@@H](O)CNCc4cccc(OC)c4	CHEMBL558542	392
C[C@]1(N)COCc2cc(cc(c2)C(=O)N[C@H](CCc3cccc(C1)c3)c4ccccc4)N(c5ccccc5)S(=O)(=O)C	CHEMBL248884	12			CC(=O)N[C@@H](Cc1cc(F)cc(F)c1)[C@H](O)CN[C@]2(CC[C@@H](NC2)C(F)(F)F)c3cccc(c3)C(C)(C)C	CHEMBL570762	33			COc1cccc(CNC[C@@H](O)[C@H](Cc2cc(F)cc(F)c2)NC(=O)c3cc(cc(c3)\C(=N/O)\C)N(c4ccccc4)S(=O)(=O)C)c1	CHEMBL553458	91			C(CCCNc1c2Cc3ccccc3c2nc4ccccc14)CCCNc5c6Cc7ccccc7c6nc8ccccc58	CHEMBL1819180	400
CC(=O)N[C@H](Cc1cc(F)cc(F)c1)[C@@H](O)CNC2(CCc3n[nH]cc3C2)c4cccc(c4)C(C)(C)C	CHEMBL609987	12			CCn1nnc2c(cc(cc12)C(=O)N[C@@H](Cc3ccccc3)[C@H](O)CNCc4cccc(c4)C(F)(F)F)N5CCCC5=O	CHEMBL449938	34			CC(=O)N[C@@H](Cc1cc(F)cc(F)c1)[C@H](O)CNC2(CCCCC2)c3cc(NS(=O)(=O)C)cc(c3)C(C)(C)C	CHEMBL1258001	93			CCN1C(=O)Nc2c1cc(cc2N3CCCC3=O)C(=O)N[C@@H](Cc4ccccc4)[C@H](O)CNCc5cccc(OC)c5	CHEMBL448939	420
CC(C)[C@H](NC(=O)C[C@H](O)[C@@H](COCc1ccccc1)NC(=O)c2cc(cc(c2)C(=O)N[C@@H](C)c3ccccc3)N(C)S(=O)(=O)C)C(=O)Nc4cc(cc(c4)C(=O)O)C(=O)O	CHEMBL464887	12			NC1=Nc2ccc3Oc4cccc(CCCN(C5CCCCC5)C(=O)CC[C@@H](C6CCCCC6)N1Cc2c3)c4	CHEMBL1098734	34			CS(=O)(=O)Oc1cc(nc(c1)C(=O)N2COC[C@@H]2c3ccccc3)C(=O)N[C@@H](Cc4ccccc4)[C@H](O)C(=O)Nc5cccc(c5)c6nn[nH]n6	CHEMBL399840	96			CC(Cc1cc2cc(ccc2nc1N)c3ccccc3C)C(=O)NCc4cncs4	CHEMBL1821823	430
CC(C)C[C@H](NC(=O)[C@@H](N)CCC(=O)O)C(=O)N[C@@H](CC(=O)O)C(=O)N[C@@H](CC(C)C)P(=O)(O)CC(C)C(=O)N[C@@H](C(C)C)C(=O)N[C@@H](CCC(=O)O)C(=O)N[C@@H](Cc1ccccc1)C(=O)O	CHEMBL242315	12			CC(C)C[C@H](NC(=O)[C@@H](NC(=O)[C@@H](N)CNC(=O)C1=C(F)C(=O)NC(=O)N1)C(C)C)C(=O)N[C@@H](Cc2ccccc2)[C@@H](O)C(=O)N[C@H](C)c3ccccc3	CHEMBL1817733	34.8			CCOCCCNC(=O)c1cc(NC(=O)Nc2cccc(Cl)c2)ccc1N(C)C	CHEMBL190644	97			CCCCN(CCCC)S(=O)(=O)CCC(=O)N[C@@H](Cc1ccccc1)[C@H](O)CNCc2cccc(OC)c2	CHEMBL253165	484
CC(C)C[C@H](NC(=O)[C@H](CC(=O)N)NC(=O)[C@@H](NC(=O)[C@@H](N)CCC(=O)O)C(C)C)[C@@H](O)C[C@@H](C)C(=O)N[C@@H](C)C(=O)O	CHEMBL189901	12			C[C@H](Cc1cc2cc(ccc2nc1N)c3ncccc3C)C(=O)NCCC(C)(C)C	CHEMBL1821826	35			CN1C(=NC(C1=O)(c2cccc(c2)c3cncnc3)c4cnn(C)c4)N	CHEMBL1824133	100			C[C@H](Cc1cc2cc(ccc2nc1N)c3ccccc3C)C(=O)NCc4cnccn4	CHEMBL1821824	490
CCc1cn2CCS(=O)(=O)N(C)c3cc(cc1c23)C(=O)N[C@@H](Cc4ccccc4)[C@H](O)CNCc5cccc(OC)c5	CHEMBL539436	12			CN(c1cc(\C=C/C2CC2)cc(c1)C(=O)N[C@@H](Cc3ccccc3)[C@H](O)CNC4CC4)S(=O)(=O)C	CHEMBL201730	35			COc1ccc(cc1)C2(N=C(N)N3CCCN=C23)c4cccc(c4)c5cncnc5	CHEMBL582828	100			COc1cccc(CNC[C@H](O)[C@H](Cc2cc(F)cc(F)c2)NC(=O)c3cc(cc(c3)\C(=N/OCC=C)\C)C(=O)NC(C)c4ccc(F)cc4)c1	CHEMBL555518	530
CCCN(CCC)C(=O)c1cc(cc(c1)C(=O)N[C@@H](Cc2cc(F)cc(F)c2)[C@@H](O)CNCc3cccc(OC)c3)C(C)O	CHEMBL539973	12			CS(=O)(=O)N(c1ccccc1)c2cc(cc(c2)C(=O)N[C@@H](Cc3ccccc3)[C@H](O)CNCc4cccc(c4)C(F)(F)F)N5CCCC5=O	CHEMBL1210363	35			CON[C@H]1CC[C@@](CN1)(NC[C@@H](O)[C@H](Cc2cc(F)cc(F)c2)NC(=O)C)c3cccc(c3)C(C)(C)C	CHEMBL570982	100			CCN1CCN2CCS(=O)(=O)N(C)C3C=C(C=C1C23)C(=O)N[C@@H](Cc4ccccc4)[C@H](O)CNC5CC5	CHEMBL561095	550
COCC#Cc1cc(ccc1F)[C@]2(N=C(N)N(C)C2=O)c3ccc(OC(F)F)cc3	CHEMBL1270526	12			CCNc1cc(cc(c1)C(=O)N[C@@H](Cc2ccccc2)[C@H](O)CNC3CCc4ccc(OC)cc34)N5CCCCS5(=O)=O	CHEMBL401475	36			O=C(Nc1cc(ccc1N2CCN(CCCCCN3C(=O)c4ccccc4C3=O)CC2)c5ccccc5)c6cccc7ccccc67	CHEMBL379067	100			NC(=NC(=O)Cn1c(ccc1C23CC4CC(CC(C4)C2)C3)c5ccccc5)N	CHEMBL402330	600
CC(C)[C@@H](NC(=O)C[C@H](O)[C@H](COc1cc(F)cc(F)c1)NC(=O)c2cc(cc(c2)C(=O)N[C@@H](C)c3ccccc3)N(C)S(=O)(=O)C)C(=O)NCc4ccc(cc4)C(=O)O	CHEMBL450491	13			COc1cc2N=C(N)N3Cc2cc1Oc4cccc(CCN(C5CCCCC5)C(=O)CC[C@H]3C6CCCCC6)c4	CHEMBL1095430	36			CCN(CCCCCCNC1=CC(=O)C(=CC1=O)NCCCCCCN(CC)Cc2ccccc2OC)Cc3ccccc3OC	CHEMBL231160	108			Cc1oc(CN\C(=N/C(=O)Cn2c(ccc2C34CC5CC(CC(C5)C3)C4)c6ccccc6)\N)nn1	CHEMBL272766	665
CCCC[C@H](O)[C@H](Cc1cc(F)cc(F)c1)NC(=O)c2cc(NCC3CC3C)nc(c2)N(C)S(=O)(=O)C	CHEMBL247595	13			COc1ccc(cc1Cl)C2(N=C(N)N(C)C2=O)c3cccc(c3)c4cccnc4	CHEMBL565996	36			C[C@@H](NC(=O)c1cc(cc(c1)c2ccccc2C(=O)C)C(=O)N[C@@H](Cc3ccccc3)[C@H](O)CNc4ccccc4)c5ccccc5	CHEMBL400916	110			Brc1ccc(N2CCNCC2)c(NC(=O)C3=Cc4ccccc4OC3=O)c1	CHEMBL1165089	670
CCCCS(=O)(=O)C[C@@H](NC(=O)C)C(=O)N[C@@H](Cc1cc(F)cc(F)c1)[C@H](O)CNCc2cccc(CC)c2	CHEMBL232490	13			CC(C)[C@H](O)C(=O)N[C@@H](C)C(=O)N[C@@H](Cc1ccccc1)[C@@H](O)C[C@@H](C)C(=O)N[C@@H](C(C)C)C(=O)NCc2ccccc2	CHEMBL316181	37			CC(=O)N[C@@H](Cc1cc(F)cc(F)c1)[C@H](O)CNC2(CCCCC2)c3cccc(c3)c4cscn4	CHEMBL1209055	110			O=C(CSc1nc2ccc(Nc3nc(nc(n3)N4CCCC4)N5CCCC5)cc2s1)NCc6occc6	CHEMBL1271091	690
CCCN(CCC)C(=O)c1cc(Sc2ccccc2)cc(c1)C(=O)N[C@@H](Cc3cc(F)cc(F)c3)[C@@H](O)CNCc4cccc(OC)c4	CHEMBL557267	13			CC(C)C[C@H](NC(=O)[C@H](CC(=O)N)NC(=O)[C@@H](NC(=O)[C@@H](N)CCC(=O)O)C(C)C)[C@@H](O)[C@@H]1CCC[C@H]1C(=O)N[C@@H](C)C(=O)N[C@@H](CCC(=O)O)C(=O)O	CHEMBL363783	40			CC(Cc1cc2cc(ccc2nc1N)c3ccccc3C(=O)C)C(=O)NCCC(C)(C)C	CHEMBL1821830	110			CC(=O)N[C@@H](Cc1cc(F)cc(F)c1)[C@H](O)CNC2(CC2)c3cc(CC(C)(C)C)c[n+]([O-])c3	CHEMBL1257533	720
COC[C@H]1CCCN1C(=O)c2cc(C)cc(c2)C(=O)N[C@@H](Cc3cc(F)cc(F)c3)[C@H](O)[C@H]4CN(CCN4)S(=O)(=O)c5ccccc5	CHEMBL1097348	13			CCc1cn(C)c2c(cc(cc12)C(=O)N[C@@H](Cc3ccccc3)[C@H](O)CNCc4cccc(c4)C(F)(F)F)N5CCCC5=O	CHEMBL508663	40			CCCCCOc1ccc(cc1)c2ccc(c3ccccc3Cl)n2Cc4ccc(OCCO)c(N)n4	CHEMBL1093807	110			C[C@@]1(N)Cc2cccc(CC[C@@H](NC(=O)c3cc(COC1=O)cc(c3)c4occn4)c5ccccc5)c2	CHEMBL251307	780
COCC#Cc1cc(ccc1F)[C@]2(N=C(N)N(C)C2=O)c3ccc(OC(F)F)c(C)c3	CHEMBL1270334	13			CCNc1cc(cc(c1)C(=O)N[C@@H](Cc2ccccc2)[C@H](O)CNCc3cncc(c3)C#N)N4CCCCS4(=O)=O	CHEMBL502289	40			CCNc1cc(cc(N2CCCC2=O)c1OC)C(=O)N[C@@H](Cc3ccccc3)[C@H](O)CNCc4cccc(c4)C(F)(F)F	CHEMBL443509	110			COc1cccc(CNC[C@@H](O)[C@H](Cc2cc(F)cc(F)c2)NC(=O)c3cc(cc(c3)\C(=N/OCc4ccccc4)\C)N5CCCCS5(=O)=O)c1	CHEMBL541738	821
CS(=O)(=O)N(c1ccccc1)c2cc(cc(c2)c3ccccc3)C(=O)N[C@@H](Cc4ccccc4)[C@H](O)CNCc5cccc(c5)C(F)(F)F	CHEMBL1210362	13			CCNc1cc(N2CCCCS2(=O)=O)c(F)c(c1)C(=O)N[C@@H](Cc3ccccc3)[C@H](O)CNCc4cccc(c4)C(F)(F)F	CHEMBL253641	40			CCCC(CCC)S(=O)(=O)CC(NC(=O)OCc1ccccc1)C(=O)N[C@@H](Cc2ccccc2)[C@H](O)CNCc3cccc(OC)c3	CHEMBL253800	112			CCc1cn2CS(=O)(=O)N(C)c3cc(cc1c23)C(=O)N[C@@H](Cc4ccccc4)[C@H](O)CNC	CHEMBL561838	868
O[C@@H]([C@H](Cc1ccccc1)NC(=O)c2cc(Cl)cc(n2)C(=O)N3COC[C@@H]3c4ccc(F)cc4)C(=O)Nc5cccc(c5)c6nn[nH]n6	CHEMBL501242	13			CN1C(=N[C@](C1=O)(c2ccc(OC(F)F)cc2)c3cccc(c3)C#CCCCCF)N	CHEMBL1271142	40			CC(=O)N[C@@H](Cc1cc(F)cc(F)c1)[C@H](O)CNC2(CCCCC2)c3cccc(c3)c4cocc4	CHEMBL1208998	120			CC(=O)N[C@@H](Cc1cc(F)cc(F)c1)[C@H](O)CNC2(CC2)c3ccn(CC(C)(C)C)n3	CHEMBL1258003	870
CC(=O)N[C@H](Cc1cc(F)cc(F)c1)[C@@H](O)CNC2(CCc3nc(N)ncc3C2)c4cccc(c4)C(C)(C)C	CHEMBL609988	14			CN1C(=NC(C1=O)(c2ccncc2)c3cccc(c3)c4cccc(c4)C#N)N	CHEMBL1092475	40			COC(=O)c1cc(NC(=O)[C@@H](NC(=O)C[C@H](O)[C@H](Cc2cc(F)cc(F)c2)NC(=O)C(O)c3ccccc3c4ccccc4)C(C)C)cc(c1)C(=O)OC	CHEMBL143687	120			CC(C)C[C@H](NC(=O)[C@@H](NC(=O)[C@@H](N)CNC(=O)c1nn[nH]n1)C(C)C)C(=O)NCCC(=O)Nc2cccc(c2)C(=O)O	CHEMBL1645523	870
CC(C)[C@@H](NC(=O)C[C@@H](O)[C@H](COc1ccccc1)NC(=O)c2cc(cc(c2)C(=O)N[C@@H](C)c3ccccc3)N(C)S(=O)(=O)C)C(=O)NCc4ccc(cc4)C(=O)O	CHEMBL444121	14			CN1C(=NC(C1=O)(c2ccncc2)c3cccc(c3)c4cccc(F)c4F)N	CHEMBL1092786	40			CCNc1cc(cc(c1)C(=O)N[C@@H](Cc2occc2)[C@H](O)CNCc3cccc(OC)c3)N4CCCCS4(=O)=O	CHEMBL254272	129			O[C@H](CNCc1cccc(c1)C(F)(F)F)[C@H](Cc2ccccc2)NC(=O)c3cccc(c3)N4c5ccccc5OS4(=O)=O	CHEMBL1210350	910
CC(C)C[C@H](NC(=O)[C@@H](NC(=O)[C@@H](N)CNC(=O)c1nn[nH]n1)C(C)C)C(=O)N[C@@H](Cc2ccccc2)[C@@H](O)C(=O)Nc3cc(Cl)cc(Cl)c3	CHEMBL257587	14			CN1C(=NC(C2CCCCC2)(C1=O)c3cccc(NC(=O)c4occc4C)c3)N	CHEMBL590830	40			CC(C)c1cccc(CNC[C@H](O)[C@H](Cc2ccccc2)NC(=O)[C@@H]3CCC[C@@H](C3)C(C)(C)N4CCCC4=O)c1	CHEMBL1077236	130			Nc1cccc(Cn2c(ccc2c3ccccc3Cl)c4ccc(Nc5cncnc5)cc4)n1	CHEMBL1093806	980
CC(C)S(=O)(=O)N(C)c1cc(cc(NC[C@H]2C[C@@H]2C)n1)C(=O)N[C@H](CO)Cc3cc(F)cc(F)c3	CHEMBL395084	14			COc1ccc(cc1C(F)(F)F)C2(N=C(N)N(C)C2=O)c3cccc(c3)c4cccnc4	CHEMBL585289	40			CC(=O)N[C@@H](Cc1cc(F)cc(F)c1)[C@H](O)CNC2(CCCCC2)c3onc(CC(C)(C)C)c3	CHEMBL1258687	139			C[C@@H](NC(=O)c1cc(C(=O)N[C@@H](Cc2ccccc2)[C@H](O)CNC3CC3)c4cc(C)oc4c1)c5ccccc5	CHEMBL463865	998
CCn1cc2CCS(=O)(=O)N(C)c3cc(cc1c23)C(=O)N[C@@H](Cc4ccccc4)[C@@H](O)CNC5CC5	CHEMBL550208	14			COc1cncc(c1)c2cccc(c2)C3(N=C(N)N(C)C3=O)c4ccsc4	CHEMBL1824358	40			CO[C@@H](COCc1ccc(OC)cc1)C[C@H](O)[C@H](COc2cc(F)cc(F)c2)NC(=O)c3cc(cc(c3)C(=O)N[C@H](C)c4ccccc4)N(C)S(=O)(=O)C	CHEMBL572692	140			Brc1ccc(N2CCNCC2)c(NC(=O)c3cccc4ccccc34)c1	CHEMBL378032	1000
CCNc1cc(cc(c1)C(=O)N[C@@H](Cc2ccccc2)[C@H](O)CNC3(CCCCC3)c4cccc(OC)c4)N5CCCC5=O	CHEMBL403427	14			Nc1nc(Cn2c(ccc2c3ccccc3Cl)c4ccc(Oc5cncnc5)cc4)ccc1OCCO	CHEMBL1090542	40			COC[C@H]1CCCN1C(=O)c2cncc(c2)C(=O)N[C@@H](Cc3cc(F)cc(F)c3)[C@H](O)[C@@H]4NCCN(Cc5ccccc5)C4=O	CHEMBL511110	140			CC(=O)N[C@@H](Cc1cc(F)cc(F)c1)[C@H](O)CNC2(CCCCC2)c3cccc(c3)N4CCCNC4=O	CHEMBL1209284	1000
COC[C@H]1CCCN1C(=O)c2cc(C)cc(c2)C(=O)N[C@@H](Cc3cc(F)cc(F)c3)[C@H](O)[C@H]4CN(CCN4)S(=O)(=O)Cc5ccccc5	CHEMBL1097353	14			CC(=O)N[C@@H](Cc1cc(F)cc(F)c1)[C@H](O)CNC2(CCCCC2)c3cccc(c3)c4ccsc4	CHEMBL1208999	44			CC(C)(C)c1cccc(CNC[C@@H](O)[C@H](Cc2cc(F)cc(F)c2)NC(=O)[C@@H]3CN(Cc4cc(F)cc(F)c4)C(=O)N3)c1	CHEMBL260621	150			CC(C)C[C@H](NC(=O)c1cc(cc(c1)C(=O)N[C@H](C)c2ccc(F)cc2)N(C)S(=O)(=O)C)[C@@H](O)C[C@@H](C)C(=O)NN3CCN(Cc4ccccc4)CC3	CHEMBL449152	1000
CCC(=O)c1cc(cs1)C2(N=C(N)N(C)C2=O)c3cccc(c3)c4cccnc4F	CHEMBL1824360	15			CC(C)c1cccc(CNC[C@@H](O)[C@@H]2C[C@H](C)CCCCCCCCC(=O)N(C)[C@@H](C)C(=O)N2)c1	CHEMBL564010	45			CCCN(CCC)C(=O)c1cc(C)cc(c1)C(=O)N[C@@H](Cc2cc(F)cc(F)c2)[C@H](O)[C@H]3C[C@H](CN3)OCc4ccccc4	CHEMBL270359	150			CCCN(CCC)C(=O)c1cc(cc(c1)[N+](=O)[O-])C(=O)N[C@@H](Cc2ccccc2)C(O)C(=O)NCC3CCN(Cc4ccccc4)CC3	CHEMBL505994	1000
CCC(=O)c1cc(cs1)C2(N=C(N)N(C)C2=O)c3cccc(c3)c4cncnc4	CHEMBL1824353	15			O[C@H](CCN1CCN(CC1)c2ccc(cc2NC(=O)c3cccc4ccccc34)c5ccccc5)c6ccccc6	CHEMBL208903	46			CCCN1[C@@H](Cc2cc(C[C@@H]3CS(=O)(=O)C[C@H](NCc4cccc(c4)C(C)C)[C@H]3O)ccc2O)COC1=O	CHEMBL1615184	150			CSCC[C@H](NC(=O)[C@@H](NC(=O)C)C(C)C)C(=O)NC(CC(C)C)C(O)CC(=O)N[C@@H](C(C)C)C(=O)N[C@@H](C)C(=O)N[C@@H](CCC(=O)O)C(=O)O	CHEMBL327386	1000
CCCC(CCC)S(=O)(=O)C[C@@H](NC(=O)c1ccccc1C)C(=O)N[C@@H](Cc2cc(F)cc(F)c2)[C@H](O)CNCc3cccc(CC)c3	CHEMBL393140	15			CC(=O)N[C@@H](Cc1cc(F)cc(F)c1)[C@H](O)CNC2(CCC(=O)NC2)c3cccc(c3)C(C)(C)C	CHEMBL566810	47			CCN(Cc1ccccc1)Cc2ccc(cc2)C3=Cc4ccc(OCCNC(=O)Cc5cc(F)cc(F)c5)cc4OC3=O	CHEMBL26125	150			CN1C(=NC(C2CCCCC2)(C3CCCCC3)C1=O)N	CHEMBL589163	1080
CCCCS(=O)(=O)C[C@@H](NC(=O)SC1CCOC1)C(=O)N[C@@H](Cc2cc(F)cc(F)c2)[C@H](O)CNCc3cccc(CC)c3	CHEMBL409948	15			COCc1cc2cc(OCCCCOc3cccc(C[C@H](NC2=O)[C@H](O)CNC4(CC4)c5cccc(c5)C(C)C)c3)n1	CHEMBL595267	47			CCN(Cc1ccccc1)Cc2ccc(cc2)C3=Cc4ccc(OCCNC(=O)\C=C\c5ccc(Cl)c(Cl)c5)cc4OC3=O	CHEMBL270248	151			CC(=O)N[C@@H](Cc1cc(F)cc(F)c1)[C@H](O)CNC2(CCCCC2)c3cccc(c3)c4occc4	CHEMBL1208997	1100
Cl.CS(=O)(=O)N(c1ccncc1)c2cccc(c2)C(=O)N[C@@H](Cc3ccccc3)[C@H](O)CNCc4cccc(c4)C(F)(F)F	CHEMBL1210357	15			CC(=O)N[C@@H](Cc1cc(F)cc(F)c1)[C@H](O)CNC2(CCC(=C)NC2)c3cccc(c3)C(C)(C)C	CHEMBL584547	48			O=C(Nc1cc(ccc1N2CCN(Cc3ccccc3)CC2)c4ccccc4)C5=Cc6ccccc6OC5=O	CHEMBL212578	151			C[C@@H](NC(=O)c1cc(cc(c1)C(=O)N[C@@H](Cc2ccccc2)[C@H](O)CNC3CC3)C#Cc4ccccc4)c5ccccc5	CHEMBL450801	1119
O[C@@H]([C@H](Cc1ccccc1)NC(=O)c2cc(Br)cc(n2)C(=O)N3COC[C@@H]3c4ccccc4)C(=O)Nc5cccc(c5)c6nn[nH]n6	CHEMBL445281	15			CCn1cc2CCS(=O)(=O)N(C)c3cc(cc1c23)C(=O)N[C@@H](Cc4ccccc4)C(=O)CNC5CCOCC5	CHEMBL558471	48			CC(=O)N[C@@H](Cc1cc(F)cc(F)c1)[C@H](O)CNC2(CCCCC2)c3cn(C[Si](C)(C)C)nn3	CHEMBL1257184	154			CCCCNC(=O)[C@H](C)C[C@H](O)[C@@H]1COC\C=C\CSC[C@H](NC(=O)C)C(=O)N[C@@H](C)C(=O)N1	CHEMBL212102	1120
CC(C)C[C@H](NC(=O)[C@@H](NC(=O)[C@@H](N)CNC(=O)C(=O)O)C(C)C)C(=O)N[C@@H](Cc1ccccc1)[C@@H](O)C(=O)Nc2cccc(c2)C(=O)O	CHEMBL367139	16			CC(C)S(=O)(=O)N(C)c1cc(cc(NC[C@H]2C[C@@H]2C)n1)C(=O)N[C@@H](Cc3ccccc3)[C@@H](N)CF	CHEMBL230245	49			CCOc1cc(cc(c1)c2ccccc2C#N)C(=O)N[C@@H](Cc3ccccc3)[C@H](O)CNCc4cccc(c4)C(F)(F)F	CHEMBL253866	160			COc1ccc2C(=CC(=O)Oc2c1)CC(=O)Nc3cc(Br)ccc3N4CCN(CC4)S(=O)(=O)c5cccs5	CHEMBL205637	1130
CC(C)C[C@H](NC(=O)[C@@H](NC(=O)[C@@H](N)CNC(=O)O)C(C)C)C(=O)N[C@@H](Cc1ccccc1)[C@@H](O)C(=O)Nc2cccc(c2)C(=O)O	CHEMBL38830	16			CCOc1cc(cc(c1)C(=O)N[C@@H](Cc2ccccc2)[C@H](O)CNCc3cccc(c3)C(F)(F)F)N(c4ccccc4)S(=O)(=O)C	CHEMBL1210360	50			CC(=O)N[C@@H](Cc1cc(F)cc(F)c1)[C@H](O)CNC2(CCCCC2)c3cc(Br)cc(c3)C(C)(C)C	CHEMBL1257649	174			CCNc1cc(cc2N(C)S(=O)(=O)CCCc12)C(=O)N[C@@H](Cc3ccccc3)[C@H](O)CNC4CCOCC4	CHEMBL564712	1185
CC(C)C[C@H](NC(=O)[C@H](CC(=O)N)NC(=O)[C@@H](NC(=O)[C@@H](N)CCC(=O)O)C(C)C)[C@@H](O)[C@@H]1CCC[C@H]1C(=O)N[C@@H](C)C(=O)N[C@@H](CCC(=O)O)C(=O)N[C@@H](Cc2ccccc2)C(=O)O	CHEMBL434943	16			CN1C(=NC(C1=O)(c2cccc(c2)c3cccnc3F)c4cnn(CCF)c4)N	CHEMBL1824337	50			COCc1cc2NCCCCOc3cccc(C[C@H](NC(=O)c(c1)c2)[C@H](O)CNC(CF)c4cccc(c4)C(C)(C)C)c3	CHEMBL594709	177			[Na+].[Na+].[Na+].CC(C)C(\C=C/[C@@H](C)[C@H]1CC[C@H]2[C@@H]3C[C@H](OS(=O)(=O)[O-])[C@H]4C[C@H](OS(=O)(=O)[O-])[C@H](C[C@]4(C)[C@H]3CC[C@]12C)OS(=O)(=O)[O-])C(C)C	CHEMBL1224769	1200
CC(C)CCn1cc(cn1)C2(N=C(N)N(C)C2=O)c3cccc(c3)c4cccnc4F	CHEMBL1824341	16			O[C@@H]([C@H](Cc1ccccc1)NC(=O)C2=CC(=O)C=C(O2)C(=O)N3COC[C@@H]3c4ccccc4)C(=O)Nc5cccc(c5)c6nn[nH]n6	CHEMBL400043	50			CCCCNC(=O)[C@H](C)C[C@H](O)[C@@H]1CSC\C=C\CS[C@H]2CCCN[C@H]2C(=O)N[C@@H](C)C(=O)N1	CHEMBL210240	190			O[C@@H]([C@H](Cc1cc(F)cc(F)c1)NC(=O)[C@@H]2CN(Cc3nccs3)C(=O)C2)[C@H]4C[C@H](CN4)OCc5ccccc5	CHEMBL430039	1200
CCC(Cc1cc2cc(ccc2nc1N)c3ccccc3C)C(=O)NCC4CCCCC4	CHEMBL1821817	16			CCCN(c1cc2COC[C@](C)(N)Cc3cccc(CC[C@@H](NC(=O)c(c2)c1)C#C)c3)S(=O)(=O)C	CHEMBL248876	53			NC1=NC(C2=NCCCN12)(c3ccc4OCCOc4c3)c5cccc(c5)c6cccnc6F	CHEMBL566968	190			O=C(Nc1cc(ccc1N2CCN(Cc3ccccc3)CC2)c4ccccc4)c5cccc6ccccc56	CHEMBL379334	1250
CN(c1cc2COC(=O)[C@](C)(N)Cc3cccc(CC[C@@H](NC(=O)c(c2)c1)c4ccccc4)c3)S(=O)(=O)CC(F)(F)F	CHEMBL402921	16			CCNc1cc(cc(c1)C(=O)N[C@@H](Cc2ccccc2)[C@H](O)CN[C@@H](C)C(=O)NC3CCCCC3)N(c4ccccc4)S(=O)(=O)C	CHEMBL1210359	53			C[C@@H](NC(=O)c1cc(cc(c1)C(=O)N[C@@H](Cc2ccccc2)[C@H](O)CNCc3ccc4ccn(c4c3)S(=O)(=O)C)N(C)S(=O)(=O)C)c5ccccc5	CHEMBL253930	200			C[C@@H](NC(=O)c1cc(cc(c1)c2cn(Cc3ccccc3)nn2)C(=O)N[C@@H](Cc4ccccc4)[C@H](O)CNC5CC5)c6ccccc6	CHEMBL449578	1256
CCC[C@H](NC[C@H](Cc1ccccc1)NC(=O)c2cc(cc(c2)C(=O)N[C@H](C)c3ccc(F)cc3)N(C)S(=O)(=O)C)C(=O)NCC(C)C	CHEMBL211563	17			COC[C@H]1CCCN1C(=O)c2cc(C)cc(c2)C(=O)N[C@@H](Cc3cc(F)cc(F)c3)[C@H](O)[C@H]4CN(CCN4)S(=O)(=O)c5cn(C)cn5	CHEMBL1097352	53			N\C(=N\C(=O)Cc1c(csc1c2ccc(cc2)C(=O)NCC(F)(F)F)c3ccccc3Cl)\NCCCO	CHEMBL237283	200			COc1ccccc1c2ccc(c3ccc(Oc4ccccc4)cc3)n2CC(=O)NC(=N)N	CHEMBL252218	1300
CCNc1cc(cc(c1)C(=O)N[C@@H](Cc2ccccc2)[C@H](O)CNC(C)(C)c3cccc(c3)C(F)(F)F)N4CCCC4=O	CHEMBL403207	17			C[C@H](N)[C@H](Cc1ccsc1)NC(=O)c2cc(NCC3CC3C)nc(c2)N(C)S(=O)(=O)C	CHEMBL247596	54			CCCOc1ccc(cc1)c2ccc(c3ccccc3Cl)n2CC(=O)\N=C(\N)/NCc4ccc(F)c(F)c4F	CHEMBL269943	203			COc1ccc2cc(ccc2c1)c3cn(C[C@@H]4Cc5c(CN4)[nH]c6ccccc56)nn3	CHEMBL1272322	1490
COc1cccc(CNC[C@@H](O)[C@H](Cc2cc(F)cc(F)c2)NC(=O)c3cc(cc(c3)C(=O)C)N(c4ccccc4)S(=O)(=O)C)c1	CHEMBL541172	17			CCCN(CCC)C(=O)c1cc(Oc2ccccc2OC)cc(c1)C(=O)N[C@@H](Cc3cc(F)cc(F)c3)[C@@H](O)CNCc4cccc(OC)c4	CHEMBL557278	54			CC(=O)N[C@@H](Cc1cc(F)cc(F)c1)[C@H](O)CN[C@]2(CC[C@@H](NC2)S(=O)(=O)C)c3cccc(c3)C(C)(C)C	CHEMBL567026	210			CCc1cn2CCS(=O)(=O)N(C)c3ccc(C(=O)N[C@@H](COc4cc(F)cc(F)c4)[C@@H](O)C[C@H](COCc5ccc(OC)cc5)OC)c1c23	CHEMBL583304	1500
NC1=Nc2ccc3Oc4cccc(CCN(C5CCCCC5)C(=O)CC[C@@H](C6CCCCC6)N1Cc2c3)c4	CHEMBL1098733	17			CCCN(CCC)C(=O)c1cc(C)cc(c1)C(=O)N[C@@H](Cc2cc(F)cc(F)c2)[C@H](O)[C@H]3CN(CCN3)S(=O)(=O)c4cnc(C)n4C	CHEMBL1097331	57			NC1=NC(C2=NCCCN12)(c3ccc(OC(F)(F)F)cc3)c4cccc(CCC5CC5)c4	CHEMBL583888	210			CN1C(=NC(C1=O)(c2ccccc2)C34CC5CC(CC(C5)C3)C4)N	CHEMBL585952	1530
C[C@H](Cc1cc2cc(ccc2nc1N)c3ccccc3C)C(=O)N[C@@H]4CCOC(C)(C)C4	CHEMBL1821728	18			COC[C@H]1CCCN1C(=O)c2cc(OC)cc(c2)C(=O)N[C@@H](Cc3cc(F)cc(F)c3)[C@H](O)[C@@H]4NCCN(Cc5ccccc5)C4=O	CHEMBL453413	57			CCS(=O)(=O)c1cc(cc(c1)C(=O)N[C@@H](Cc2ccccc2)[C@H](O)CNCc3cccc(c3)C(F)(F)F)N(c4ccccc4)S(=O)(=O)C	CHEMBL1210364	220			Oc1ccc(cc1)C2=CC(=O)c3c(O)cc(O)c(c3O2)c4cc(ccc4O)C5=CC(=O)c6c(O)cc(O)cc6O5	CHEMBL63354	1540
CCNc1cc(cc(N2CCCCS2(=O)=O)c1OC)C(=O)N[C@@H](Cc3ccccc3)[C@H](O)CNCc4cccc(c4)C(F)(F)F	CHEMBL501927	18			CN(C)c1ccc(NC(=O)Nc2cc(cc(c2)C(F)(F)F)C(F)(F)F)cc1C(=O)NCCCN3CCOCC3	CHEMBL370043	57.8			O[C@@H]([C@H](Cc1cc(F)cc(F)c1)NC(=O)[C@@H]2CN(Cc3occc3)C(=O)C2)[C@H]4C[C@H](CN4)OCc5ccccc5	CHEMBL404682	225			CC(=O)N[C@@H](Cc1cc(F)cc(F)c1)[C@H](O)CNC2(CCCCC2)c3oc(cn3)C(C)(C)C	CHEMBL1258802	1580
COc1cccc(c1)N(c2cccc(c2)C(=O)N[C@@H](Cc3ccccc3)[C@H](O)CN[C@@H](C)C(=O)NC4CCCCC4)S(=O)(=O)C	CHEMBL1210343	18			CC(=O)N[C@@H](Cc1cc(F)cc(F)c1)[C@H](O)CNC2(CCCCC2)c3cccc(c3)n4cccn4	CHEMBL572081	59			CCNc1cc(cc(c1)C(=O)N[C@@H](Cc2ccccc2)[C@H](O)CNCc3cnn(CC)c3)N4CCCC4=O	CHEMBL402171	230			OC(=O)C(F)(F)F.Brc1ccc(N2CCNCC2)c(NC(=O)C3=CC(=O)c4ccccc4O3)c1	CHEMBL381272	1600
CC(=O)N[C@@H](Cc1cc(F)cc(F)c1)[C@H](O)CN[C@]2(CC[C@H](NO)NC2)c3cccc(c3)C(C)(C)C	CHEMBL583034	19			CCC[C@H](NC(=O)OC(C)(C)C)C(=O)N[C@@H](CCSC)C(=O)N[C@@H](Cc1ccccc1)[C@@H](O)C[C@@H](C)C(=O)N[C@@H](C(C)C)C(=O)NCc2ccncc2	CHEMBL81037	60			CCN(Cc1ccccc1)Cc2ccc(cc2)C3=Cc4cc(OC)c(OC)cc4OC3=O	CHEMBL244416	238			CC1CCc2cccc(C[C@@](C)(N)C(=O)OCc3cc(CC1)cc(c3)N(C)S(=O)(=O)C)c2	CHEMBL394225	1700
CC(=O)N[C@@H](Cc1cc(F)cc(F)c1)[C@H](O)CNC2(CCNC(=O)C2)c3cccc(c3)C(C)(C)C	CHEMBL570298	19			CNC(=O)Oc1ccc(C[C@@H]2CS(=O)(=O)C[C@H](NCc3cccc(c3)C(C)C)[C@H]2O)cc1Br	CHEMBL1760860	60			CC(C)S[C@H](NC(=O)[C@@H](C[C@H](O)[C@@H]1COCc2cccc(c2)C(NC(=O)c3cc(cc(c3)C(=O)N1)N(C)S(=O)(=O)C)c4ccccc4)C(C)C)C(=O)NCc5ccccc5	CHEMBL1644463	240			COc1ccc2C(=CC(=O)Oc2c1)CC(=O)Nc3cc(Br)ccc3N4CCNCC4.OC(=O)C(F)(F)F	CHEMBL205241	1700
CC(C)c1cccc(CNC[C@@H](O)[C@@H]2Cc3cccc(OCCCCNc4cc(cc(c4)C(=O)N2)N5COC=C5)c3)c1	CHEMBL595065	19			CCNc1cc(cc(c1)C(=O)N[C@@H](Cc2cc(F)cc(F)c2)[C@H](O)[C@H]3CN(CCN3)S(=O)(=O)c4cccc(C)c4)N5CCCCS5(=O)=O	CHEMBL1097345	62			CN1C(=NC(C1=O)(c2ccncc2)c3cccc(c3)c4ccsc4)N	CHEMBL1091441	240			CCOC(=O)CSc1nc2ccc(Nc3nc(nc(n3)N4CCCC4)N5CCCC5)cc2s1	CHEMBL1270883	1770
CCCN(CCC)C(=O)c1cc(cc(c1)C(=O)N[C@@H](Cc2cc(F)cc(F)c2)[C@@H](O)CNCc3cccc(OC)c3)C(=O)C	CHEMBL538636	19			C[C@@H](NC(=O)c1cc(cc2OCCCc12)C(=O)N[C@@H](Cc3ccccc3)[C@H](O)CNC4CC4)c5ccccc5	CHEMBL473854	63			COC(=O)N[C@H]1CC[C@@](CN1)(NC[C@@H](O)[C@H](Cc2cc(F)cc(F)c2)NC(=O)C)c3cccc(c3)C(C)(C)C	CHEMBL571432	240			CCCCCS(=O)(=O)c1cccc(c1)C(=O)N[C@@H](Cc2ccccc2)[C@H](O)CN[C@@H](C)C(=O)NC3CCCCC3	CHEMBL402305	1800
CCn1cnc2c(cc(cc12)C(=O)N[C@@H](Cc3ccccc3)[C@H](O)CNCc4cccc(c4)C(F)(F)F)N5CCCC5=O	CHEMBL500555	19			CCNc1cc(cc(N2CCCC2=O)c1C)C(=O)N[C@@H](Cc3ccccc3)[C@H](O)CNCc4cccc(c4)C(F)(F)F	CHEMBL453841	63			CCc1cn2CCS(=O)(=O)N(CC(F)(F)F)c3cc(cc1c23)C(=O)N[C@H](Cc4ccccc4)[C@H](O)CNC5CCOCC5	CHEMBL537300	248			CO[C@@H](COCc1ccc(OC)cc1)C[C@H](O)[C@H](COc2cc(F)cc(F)c2)NC(=O)c3cc(nc(c3)N(C)S(=O)(=O)C)N(C)C[C@H]4C[C@@H]4C	CHEMBL583303	1800
C[C@@H](NC(=O)c1cc(cc(c1)c2oc(cc2)C(C)(N)Cc3ccccc3)N(C)S(=O)(=O)C)c4ccc(F)cc4	CHEMBL1092146	20			COC1=C(F)C2CCC(Cc3ccc(cc3)C(F)(F)F)(C2C=C1)c4cn(C)c(N)n4	CHEMBL582982	63			CCOc1cc(cc(c1)C2=C(C)CCC2=O)C(=O)N[C@@H](Cc3ccccc3)[C@H](O)CNCc4cccc(c4)C(F)(F)F	CHEMBL400654	250			COc1ccc(cc1)C(Cc2ccc(cc2)C(F)(F)F)c3cn(C)c(N)n3	CHEMBL567718	1800
C[C@@H](O)C#Cc1cccc(c1)[C@]2(N=C(N)N(C)C2=O)c3ccc(OC(F)F)cc3	CHEMBL1269920	20			C[C@@H](NC(=O)c1cc(cc(c1)c2oc(nn2)[C@](C)(N)Cc3ccccc3)N(C)S(=O)(=O)C)c4ccc(F)cc4	CHEMBL219601	65			CN1C(=NC(C1=O)(c2ccncc2)c3cccc(c3)c4cccc(OC(F)(F)F)c4)N	CHEMBL1092125	250			Cl.Clc1ccc2c(NCCCCCCCCNC(=O)CCc3ccc4nc(c5CCCOc5c4c3)c6ccccc6)c7CCCCc7nc2c1	CHEMBL552747	1810
C[C@H](NC[C@@H](O)[C@H](Cc1ccccc1)NC(=O)c2cccc(c2)N(c3ccc(cc3)C(F)(F)F)S(=O)(=O)C)C(=O)NC4CCCCC4	CHEMBL1210346	20			CCCN(c1cc(cc(n1)N(C)C[C@H]2C[C@@H]2C)C(=O)N[C@@H](Cc3ccccc3)[C@H](C)N)S(=O)(=O)C	CHEMBL399113	67			COc1cccnc1c2ccc3nc(N)c(CC(C)C(=O)NCCC(C)(C)C)cc3c2	CHEMBL1821828	250			C[C@@H](NC(=O)c1cc(cc(c1)c2onc(n2)[C@](C)(N)Cc3ccccc3)N(C)S(=O)(=O)C)c4ccc(F)cc4	CHEMBL1082894	1830
CC(C)[C@H](NC(=O)C[C@H](O)[C@H](Cc1cc(F)cc(F)c1)NC(=O)C(O)c2ccccc2c3ccccc3)C(=O)N[C@H]4C[C@H](C[C@H](C4)C(=O)O)C(=O)O	CHEMBL41851	20			C[C@@]1(N)Cc2cccc(CC[C@@H](NC(=O)c3cc(COC1=O)cc(c3)c4ccccc4C#N)c5ccccc5)c2	CHEMBL401180	68			CCCOc1ccc(cc1)c2ccc(c3ccccc3Cl)n2CC(=O)\N=C(\N)/NCCC4OCCO4	CHEMBL272718	269			CCCN(CCC)C(=O)c1cccc(c1)C(=O)N[C@H](COCc2ccccc2)[C@@H](O)CC(=O)N[C@@H](C(C)C)C(=O)Nc3cc(cc(c3)C(=O)O)C(=O)O	CHEMBL447880	1890
CC(C)[C@H](NC(=O)C[C@H](O)[C@H](Cc1cc(F)cc(F)c1)NC(=O)C(O)c2ccccc2c3ccccc3)C(=O)Nc4cc(cc(c4)C(=O)O)C(=O)O	CHEMBL143239	20			COC[C@H]1CCCN1C(=O)c2cc(C)cc(c2)C(=O)N[C@@H](Cc3cc(F)cc(F)c3)[C@H](O)[C@H]4CN(CCN4)S(=O)(=O)c5ccc(Cl)s5	CHEMBL1097351	68			C[C@@]1(N)Cc2cccc(CC[C@@H](NC(=O)c3cc(Br)cc(COC1=O)c3)c4ccccc4)c2	CHEMBL251118	270			[Cl-].COc1ccc(NC(=O)c2cccc(NC(=O)C[n+]3cccc(c3)C(=O)N)c2)cc1	CHEMBL1164643	1900
CC(C)Cn1cc(cn1)C2(N=C(N)N(C)C2=O)c3cccc(c3)c4cccnc4F	CHEMBL1824340	20			NCCCCCN1CCN(CC1)c2ccc(cc2NC(=O)c3cccc4ccccc34)c5ccccc5	CHEMBL379820	68			CC(=O)N[C@@H](Cc1cc(F)cc(F)c1)[C@H](O)CNC2(CCCOC2)c3cccc(c3)n4cccn4	CHEMBL572313	270			C[C@@H](NC(=O)c1cc(cc(c1)c2cn(nn2)[C@H](CNCc3cccc(Br)c3)Cc4ccccc4)N(C)S(=O)(=O)C)c5ccccc5	CHEMBL1795872	2000
CC[C@H](NC[C@H](Cc1ccccc1)NC(=O)c2cc(cc(c2)C(=O)N[C@H](C)c3ccc(F)cc3)N(C)S(=O)(=O)C)C(=O)NCC(C)C	CHEMBL209372	20			CC[C@H](C)[C@H](NC(=O)C1CCCCO1)C(=O)N[C@@H](C)C(=O)N[C@@H](CC(C)C)[C@@H](O)CC(=O)N[C@@H](C(C)C)C(=O)NCc2cccc(c2)C(=O)O	CHEMBL1791017	69			COc1ccc(cc1OC)C2(N=C(N)N(C)C2=O)C34CC5CC(CC(C5)C3)C4	CHEMBL567485	270			CO[C@@H](COCC=C)C[C@H](O)[C@H](COc1cc(F)cc(F)c1)NC(=O)c2cc(cc(c2)C(=O)N[C@H](C)c3ccccc3)N(C)S(=O)(=O)C	CHEMBL583700	2030
CCC(CC)Cn1cc(cn1)C2(N=C(N)N(C)C2=O)c3cccc(c3)c4cccnc4F	CHEMBL1824343	20			CN1C(=N[C@](C1=O)(c2ccc(OC(F)F)cc2)c3ccc(F)c(OCC(F)F)c3)N	CHEMBL1270339	70			Cc1csc(CN\C(=N/C(=O)Cn2c(ccc2C34CC5CC(CC(C5)C3)C4)c6ccccc6)\N)n1	CHEMBL404166	276			CCCCNC(=O)[C@H](C)C[C@@H](O)[C@@H]1C[C@H](C)CCCCCCCCCC(=O)N[C@@H](C)C(=O)N1	CHEMBL455207	2100
CCc1cn2CCS(=O)(=O)N(C)c3cc(cc1c23)C(=O)N[C@@H](Cc4ccccc4)[C@H](O)CNC5CC5	CHEMBL523193	20			CN1C(=NC(C1=O)(c2ccncc2)c3cccc(c3)c4cnccn4)N	CHEMBL1090026	70			CC(=O)N[C@@H](Cc1cc(F)cc(F)c1)[C@H](O)CNC2(CCOCC2)c3cccc(c3)C4CCOC4	CHEMBL1269841	290			Oc1cc(O)cc(Oc2c(O)cc(O)c3Oc4c(Oc23)c(O)cc5oc6c(Oc7cc(O)cc(O)c7)c(O)cc(O)c6c45)c1	CHEMBL510508	2130
CCN1c2cc(cc3c(CC)cn(CCS1(=O)=O)c23)C(=O)N[C@@H](Cc4ccccc4)[C@H](O)CNC5CC5	CHEMBL533064	20			COC[C@H]1CCCN1C(=O)c2cc(C)cc(c2)C(=O)N[C@@H](Cc3cc(F)cc(F)c3)[C@H](O)[C@H]4CN(CCN4)S(=O)(=O)c5ccccn5	CHEMBL1097350	70			Nc1cccc(Cn2c(ccc2c3ccccc3Cl)c4ccc(Oc5cccs5)cc4)n1	CHEMBL1092913	290			C[C@@H](NC(=O)c1cc(cc(c1)c2ccsc2)C(=O)N[C@@H](Cc3ccccc3)[C@H](O)CNC4CC4)c5ccccc5	CHEMBL473652	2233
CCNc1cc(cc(c1)C(=O)N[C@@H](Cc2ccccc2)[C@H](O)CNCc3cccc(OC(F)(F)F)c3)N4CCCC4=O	CHEMBL402348	20			COc1ccc(cc1)C2(N=C(N)N3CCCN=C23)c4cccc(c4)c5cccnc5F	CHEMBL584267	70			CCCCCN1C[C@H]([C@H](Cc2ccccc2)C1=O)C(=O)N[C@@H](Cc3cc(F)cc(F)c3)[C@H](O)[C@H]4C[C@H](CN4)OCc5ccccc5	CHEMBL255400	293			CN1C(=NC(C1=O)(c2ccccc2)c3ccc(Cl)cc3)N	CHEMBL566007	2250
CN1C(=N[C@](C1=O)(c2ccc(OC(F)F)c(C)c2)c3ccc(F)c(c3)C#CCF)N	CHEMBL1270631	20			Nc1nc(Cn2c(ccc2c3ccccc3Cl)c4ccc(Oc5cncnc5)cc4)ccc1NCCO	CHEMBL1090543	70			O=C(Nc1cc(ccc1N2CCNCC2)c3ccccc3)c4cccc5ccccc45	CHEMBL211995	300			Cc1ccc(NC(=O)CN2C(=O)\C(=N/NC(=O)c3cc(ccc3O)[N+](=O)[O-])\c4ccccc24)cc1	CHEMBL1080295	2400
CN1C(=N[C@](C1=O)(c2ccc(OC(F)F)cc2)c3cccc(c3)\C(=C/C4CC4)\F)N	CHEMBL1270527	20			CC(=O)N[C@@H](Cc1cc(F)cc(F)c1)[C@H](O)CN[C@]2(CC[C@H](Nc3ccccn3)NC2)c4cccc(c4)C(C)(C)C	CHEMBL571433	73			O[C@@H]([C@H](Cc1cc(F)cc(F)c1)NC(=O)[C@@H]2CN(Cc3cccs3)C(=O)C2)[C@H]4C[C@H](CN4)OCc5ccccc5	CHEMBL402754	303			CC(=O)N[C@@H](Cc1cc(F)cc(F)c1)[C@H](O)CNC2(CCCCC2)c3cc(ncn3)C(C)(C)C	CHEMBL1257302	2430
CN1C(=N[C@](C1=O)(c2ccc(OC(F)F)cc2)c3cccc(OCC4CC4)c3)N	CHEMBL1270240	20			CCCC[C@H](NC[C@@H]1Cc2cccc(CCCCc3cc(cc(c3)C(=O)N1)N(CCC)S(=O)(=O)C)c2)C(=O)NCC(C)C	CHEMBL385374	76			C[C@H](NC[C@@H](O)[C@H](Cc1ccccc1)NC(=O)c2cccc(c2)N(c3ccccc3C#N)S(=O)(=O)C)C(=O)NC4CCCCC4	CHEMBL1210342	310			C[C@H](NC(=O)c1cc(NC(=O)CC[C@@](O)(Cc2ccccc2)C(=O)N[C@H]3[C@H](O)Cc4ccccc34)cc(c1)N(C)S(=O)(=O)C)c5ccccc5	CHEMBL539397	2500
CN1C(=NC(C1=O)(c2cccc(c2)c3cccnc3F)c4cnn(c4)C5CCCC5)N	CHEMBL1824345	20			COc1cc(cc(c1)C2(CCCCC2)NC[C@@H](O)[C@H](Cc3cc(F)cc(F)c3)NC(=O)C)C(C)(C)C	CHEMBL1257773	77			CCCN(CCC)C(=O)c1cccc(c1)C(=O)N[C@@H](Cc2ccccc2)[C@H](O)CNCc3cccc(I)c3	CHEMBL254625	310			O[C@H]1Cc2c(O)cc(O)cc2O[C@@H]1c3cc(O)c(O)c(O)c3	CHEMBL125743	2500
CN1C(=NC(C1=O)(c2cccc(c2)c3cncnc3)c4cnn(CCC5CCCCC5)c4)N	CHEMBL1824143	20			C[C@@]1(N)Cc2cccc(CC[C@@H](NC(=O)c3cc(COC1=O)cc(c3)c4ccccc4C#N)c5ccc(F)cc5)c2F	CHEMBL401181	78			O[C@@H]([C@H](Cc1cc(F)cc(F)c1)NC(=O)[C@@H]2CN(Cc3ccccn3)C(=O)C2)[C@H]4C[C@H](CN4)OCc5ccccc5	CHEMBL404839	312			Brc1ccc(N2CCN(CC2)S(=O)(=O)c3cccs3)c(NC(=O)C4=CC(=O)c5ccccc5O4)c1	CHEMBL206097	2600
COC\C=C\c1cccc(c1)[C@]2(N=C(N)N(C)C2=O)c3ccc(OC(F)F)cc3	CHEMBL1270628	20			C[C@H](Cc1cc2cc(ccc2nc1N)c3ncccc3Cl)C(=O)NCCC(C)(C)C	CHEMBL1821827	80			CC(C)c1cc(cs1)C2(CCCCC2)NC[C@@H](O)[C@H](Cc3cc(F)cc(F)c3)NC(=O)C	CHEMBL1258352	320			CN1C(=N)N[C@](CCC2CCCCC2)(CC3CCCCC3)C1=O	CHEMBL583178	2600
COc1ccc(cc1C)C2(N=C(N)N(C)C2=O)c3ccc(F)c(c3)c4cncnc4	CHEMBL567688	20			CN1C(=N[C@](C1=O)(c2ccc(OC(F)F)cc2)c3cccc(c3)C(=O)CCCF)N	CHEMBL1270239	80			CCNc1cc(cc(c1)C(=O)N[C@@H](Cc2ccccc2)[C@H](O)CNCc3cccc(OC)n3)N4CCCC4=O	CHEMBL254138	330			CCNc1cc(cc(c1)C(=O)N[C@@H](Cn2cccn2)[C@H](O)CNCc3cccc(OC)c3)N4CCCCS4(=O)=O	CHEMBL399862	2690
COc1ccc(cc1C)C2(N=C(N)N(C)C2=O)c3cccc(c3)c4cccnc4F	CHEMBL566011	20			CN1C(=N[C@](C1=O)(c2ccc(OC(F)F)cc2)c3cccc(c3)C(F)CCCF)N	CHEMBL1270336	80			CCc1cn2CCCS(=O)(=O)Nc3cc(cc1c23)C(=O)N[C@@H](Cc4ccccc4)[C@H](O)CNc5ccc(OC)cc5	CHEMBL553938	339			CCCCNC(=O)[C@H](C)C[C@H](O)[C@H](Cc1ccccc1)NC(=O)[C@@H]2CCC[C@@H](C2)C3(CCCC3)NC(=O)C	CHEMBL1084153	2700
COCC#Cc1cccc(c1)[C@]2(N=C(N)N(C)C2=O)c3ccc(OC(F)F)cc3	CHEMBL1271346	20			CN1C(=NC(C1=O)(c2cccc(c2)c3cncnc3)c4csc(Cl)c4)N	CHEMBL1824351	80			C(CN1CCCCC1)C2CCc3cc(OCc4ccc(cc4)c5ccccc5)ccc3C2	CHEMBL142715	350			CCCN(CCC)C(=O)c1cc(C)cc(c1)C(=O)N[C@@H](Cc2cc(F)cc(F)c2)[C@H](O)[C@H]3CN(CCN3)S(=O)(=O)c4cnoc4C	CHEMBL1097335	2900
COCC\C=C\c1cccc(c1)[C@]2(N=C(N)N(C)C2=O)c3ccc(OC(F)F)cc3	CHEMBL1270629	20			NC1=NC(C2=NCCCCN12)(c3ccc(OC(F)(F)F)cc3)c4cccc(c4)c5cccnc5F	CHEMBL565914	80			CC(=O)N[C@@H](Cc1cc(F)cc(F)c1)[C@H](O)CNC2(CC2)c3cnn(CC(C)(C)C)c3	CHEMBL1258002	350			CN(c1cc2cc(c1)C(=O)NC(CO)Cc3cccc(OCCNC2=O)c3)S(=O)(=O)C	CHEMBL386666	2900
COCc1cc2NCCCCOc3cccc(C[C@H](NC(=O)c(c1)c2)[C@H](O)CNC4(CC4)c5cccc(c5)C(C)C)c3	CHEMBL595066	20			NC1=NC(C2=NCCN12)(c3ccc(OC(F)(F)F)cc3)c4cccc(c4)c5cccnc5F	CHEMBL566112	80			CCCN(CC1CC1)c2cc(cc(n2)N(C)S(=O)(=O)C(C)C)C(=O)N[C@H](CO)Cc3cc(F)cc(F)c3	CHEMBL394850	350			Cc1nc(N\C(=N/C(=O)Nc2ccccc2)\NC(=O)Nc3ccccc3)nc4ccccc14	CHEMBL1782314	3000
COCCC#Cc1cccc(c1)[C@]2(N=C(N)N(C)C2=O)c3ccc(OC(F)F)cc3	CHEMBL1271452	20			CC(C)c1cccc(c1)C(C)NC[C@@H](O)[C@@H]2Cc3cccc(OCCCCOc4cc(cc(C)n4)C(=O)N2)c3	CHEMBL591547	83			COc1cc2O[C@@H](CC(=O)c2c(O)c1C)c3ccc(OC)c(c3)c4c(O)cc(O)c5C(=O)C=C(Oc45)c6ccc(O)cc6	CHEMBL1208905	350			CC[C@H](C)[C@H](O)C(=O)N[C@@H](CC(F)F)C(=O)N[C@@H](Cc1ccccc1)[C@@H](O)C[C@@H](CC(F)F)C(=O)N[C@@H](C(C)C)C(=O)NCc2ccncc2	CHEMBL85379	3180
NC1=N[C@](C2=NCCCN12)(c3ccc(OC(F)(F)F)cc3)c4cccc(c4)c5cccnc5F	CHEMBL576258	20			CCCN(CCC)C(=O)c1cc(C)cc(c1)C(=O)N[C@@H](Cc2cc(F)cc(F)c2)[C@H](O)[C@H]3CN(CCN3)S(=O)(=O)c4cccs4	CHEMBL1097333	83			CCc1cn2CCS(=O)(=O)Oc3cc(cc1c23)C(=O)N[C@@H](Cc4ccccc4)[C@@H](O)CNCC#C	CHEMBL558078	360			CC(=CCC1=C(Oc2c(CC=C(C)C)c(O)cc(O)c2C1=O)c3ccc(O)cc3O)C	CHEMBL518543	3400
CN1C(=N[C@](C1=O)(c2ccc(OC(F)F)c(C)c2)c3ccc(F)c(c3)C#CC4CC4)N	CHEMBL1270432	21			CCNc1cc(cc(c1)C(=O)N[C@@H](Cc2ccccc2)[C@H](O)CNCc3cccc(Cl)c3)N4CCCC4=O	CHEMBL253719	83			CCNc1cc(N2CCCCS2(=O)=O)c(F)c(c1)C(=O)N[C@@H](Cc3ccccc3)[C@H](O)CNCc4cnn(CC)c4	CHEMBL254485	361			OC1CC(Nc2cccc(c2)c3cn(nn3)[C@H](CNCc4cccc(Br)c4)Cc5ccccc5)C(O)CC1Nc6cccc(c6)C#C	CHEMBL1795873	3400
COC[C@H]1CCCN1C(=O)c2cc(C)cc(c2)C(=O)N[C@@H](Cc3cc(F)cc(F)c3)[C@H](O)[C@H]4C[C@H](CN4)Oc5ccccc5	CHEMBL403195	21			CC(C)C[C@H](NC(=O)[C@@H](NC(=O)[C@@H](N)CNC(=O)O)C(C)C)C(=O)N[C@@H](Cc1ccccc1)[C@@H](O)C(=O)N[C@@H](CC(=O)O)C(=O)N[C@@H](C)C(=O)N[C@@H](CCC(=O)O)C(=O)O	CHEMBL39360	84			CC(=O)N[C@@H](Cc1cc(F)cc(F)c1)[C@H](O)CNC2(CCCCC2)c3cccc(c3)c4cccs4	CHEMBL1209054	370			NC(=N)NC(=O)Cn1c(ccc1c2cc(Cl)ccc2Cl)c3ccccc3	CHEMBL399837	3500
CS(=O)(=O)N(c1cccnc1)c2cccc(c2)C(=O)N[C@@H](Cc3ccccc3)[C@H](O)CNCc4cccc(c4)C(F)(F)F	CHEMBL1210358	21			CC(=O)N[C@@H](Cc1cc(F)cc(F)c1)[C@H](O)CN[C@]2(CC[C@H](Nc3cccs3)NC2)c4cccc(c4)C(C)(C)C	CHEMBL582817	85			CN1C(=NC(C2CCCCC2)(C1=O)c3cccc(NC(=O)c4ccc5OCOc5c4)c3)N	CHEMBL605518	380			CC(C)CNC(=O)[C@H](C)C[C@H](O)[C@H](CC(C)C)NC(=O)[C@H](Cc1ccc(cc1)[N+](=O)[O-])NC(=O)\C=C\c2ccc(cc2)C(F)(F)F	CHEMBL1099021	3790
C[C@@]1(N)Cc2cccc(CC[C@@H](NC(=O)c3cc(COC1=O)cc(c3)c4cccc(F)c4C#N)c5ccc(F)cc5)c2	CHEMBL399362	22			CCc1coc2c(cc(cc12)C(=O)N[C@@H](Cc3ccccc3)[C@H](O)CNCc4cccc(c4)C(F)(F)F)N5CCCC5=O	CHEMBL447120	87			CCCN(CCC)C(=O)c1cc(cc(c1)S(=O)(=O)c2ccc(OC)cc2)C(=O)N[C@@H](Cc3cc(F)cc(F)c3)[C@@H](O)CNCc4cccc(OC)c4	CHEMBL558542	392			O=C(CCCCC1SCCS1)N2CCN(CC2)c3ccc(cc3NC(=O)c4cccc5ccccc45)c6ccccc6	CHEMBL211097	3800
CC#Cc1cccc(c1)[C@]2(N=C(N)N(C)C2=O)c3ccc(OC(F)F)cc3	CHEMBL1270934	22			COc1cccc(CNC[C@@H](O)[C@H](Cc2cc(F)cc(F)c2)NC(=O)c3cc(cc(c3)\C(=N/OCc4ccccc4)\C)N(c5ccccc5)S(=O)(=O)C)c1	CHEMBL555916	88			C(CCCNc1c2Cc3ccccc3c2nc4ccccc14)CCCNc5c6Cc7ccccc7c6nc8ccccc58	CHEMBL1819180	400			CC(=O)N[C@@H](Cc1cc(F)cc(F)c1)[C@H](O)CNC2(CC2)c3cccc(c3)C4COCCO4	CHEMBL1209418	4000
CC(C)CNC(=O)[C@H](C)NC[C@H](Cc1ccccc1)NC(=O)c2cc(cc(c2)C(=O)N[C@H](C)c3ccc(F)cc3)N(C)S(=O)(=O)C	CHEMBL379513	22			C[C@@H](NC(=O)c1cc2OCCCCc2c(c1)C(=O)N[C@@H](Cc3ccccc3)[C@H](O)CNC4CC4)c5ccccc5	CHEMBL464918	89			CC(=O)N[C@@H](Cc1cc(F)cc(F)c1)[C@H](O)CN[C@]2(CC[C@H](NS(=O)(=O)C)NC2)c3cccc(c3)C(C)(C)C	CHEMBL583546	400			COc1cccc(CNC[C@@H](O)[C@H](Cc2ccccc2)NC(=O)CCCS(=O)(=O)c3ccccc3)c1	CHEMBL252547	4131
CCCCS(=O)(=O)C[C@@H](NC(=O)COC)C(=O)N[C@@H](Cc1cc(F)cc(F)c1)[C@H](O)CNCc2cccc(CC)c2	CHEMBL398775	22			CCOC(=O)CN1CCN(CC1)c2ccc(cc2NC(=O)c3cccc4ccccc34)c5ccccc5	CHEMBL211256	90			CN(c1cc2COC(=O)[C@](C)(N)Cc3cccc(CCCCNc(c2)n1)c3)S(=O)(=O)C	CHEMBL392361	400			Nc1ncccc1NCc2cc(ccc2OCc3ccccn3)c4ccc5cc[nH]c5c4	CHEMBL220428	4200
CN1C(=N[C@](C1=O)(c2ccc(OC(F)F)c(C)c2)c3cccc(c3)C#CC4CC4)N	CHEMBL1270630	22			CN1C(=NC(C1=O)(c2cccc(c2)c3cccnc3)c4ccc5OCCOc5c4)N	CHEMBL584917	90			Nc1cccc(Cn2c(ccc2c3ccccc3Cl)c4ccc(Oc5cccnn5)cc4)n1	CHEMBL1092912	410			O[C@H]1[C@H](Cc2ccc(O)c(Br)c2)CS(=O)(=O)C[C@@H]1NCc3cc(Cl)cc(Cl)c3	CHEMBL1760867	4200
COC[C@H]1CCCN1C(=O)c2cc(C)cc(c2)C(=O)N[C@@H](Cc3cc(F)cc(F)c3)[C@H](O)[C@H]4CN(CCN4)S(=O)(=O)c5cccc(Cl)c5	CHEMBL1097349	22			CN1C(=NC(C1=O)(c2ccsc2)c3cccc(c3)c4cnccn4)N	CHEMBL1824359	90			CCN1C(=O)Nc2c1cc(cc2N3CCCC3=O)C(=O)N[C@@H](Cc4ccccc4)[C@H](O)CNCc5cccc(OC)c5	CHEMBL448939	420			CC(C)CNC(=O)[C@H](C)C[C@H](O)[C@H](CC(C)C)NC(=O)[C@H](Cc1ccc(cc1)[N+](=O)[O-])NC(=O)c2ccc(Cl)cc2Cl	CHEMBL1099025	4240
O[C@@H]([C@H](Cc1ccccc1)NC(=O)c2cc(Cl)cc(n2)C(=O)N3COC[C@@H]3c4ccccc4)C(=O)Nc5cccc(c5)c6nn[nH]n6	CHEMBL448015	22			CC[C@H](C)[C@H](NC(=O)C)C(=O)N[C@@H](CCSC)C(=O)N[C@@H](CC(C)C)[C@@H](O)CC(=O)N[C@@H](Cc1ccc(O)cc1)C(=O)NCc2cccc(c2)C(=O)O	CHEMBL1791010	91			CC(Cc1cc2cc(ccc2nc1N)c3ccccc3C)C(=O)NCc4cncs4	CHEMBL1821823	430			CC(=O)N[C@@H](Cc1cc(F)cc(F)c1)[C@H](O)CNC2(CCCCC2)c3cc(cs3)C#C	CHEMBL1258575	4316
CC(C)CNC(=O)[C@H](C)NC[C@H](Cc1ccccc1)NC(=O)c2cc(CCC3C[C@@H]3C)cc(c2)N(C)S(=O)(=O)C	CHEMBL210414	23			CCNc1cc(cc(c1)C(=O)N[C@@H](Cc2ccccc2)[C@H](O)CNC3CCOCC3)N4CCCCS4(=O)=O	CHEMBL560497	91			CC(=O)N[C@@H](Cc1cc(F)cc(F)c1)[C@H](O)CNC2(CC2)c3cn(CC(C)(C)C)nn3	CHEMBL1258121	450			CC(=O)N[C@@H](Cc1cc(F)cc(F)c1)[C@H](O)[C@H]2CN(CCN2)S(=O)(=O)c3cccc(C)c3	CHEMBL1087742	4350
CCCN(c1cc2COC[C@](C)(N)Cc3cccc(CC[C@@H](NC(=O)c(c2)c1)c4ccccc4)c3)S(=O)(=O)C	CHEMBL248699	23			CC(=O)N[C@@H](Cc1cc(F)cc(F)c1)[C@H](O)CNC2(CCCCC2)c3cc(NS(=O)(=O)C)cc(c3)C(C)(C)C	CHEMBL1258001	93			CC(=O)N[C@@H](Cc1cc(F)cc(F)c1)[C@H](O)CNC2(CCCCC2)c3cccc(I)c3	CHEMBL1209892	460			CC(C)C[C@H](NC(=O)[C@@H](NC(=O)[C@@H](N)CNC(=O)c1nn[nH]n1)C(C)C)C(=O)O	CHEMBL1645528	4400
CCn1ccc2c(cc(cc12)C(=O)N[C@@H](Cc3ccccc3)[C@H](O)CNCc4cccc(c4)C(F)(F)F)N5CCCC5=O	CHEMBL501338	23			CC(=O)N[C@H](Cc1cc(F)cc(F)c1)[C@@H](O)CNC2(CCc3nc(C)ncc3C2)c4cccc(c4)C(C)(C)C	CHEMBL1163020	93			Nc1cccc(Cn2c(ccc2c3ccccc3Cl)c4ccc(Oc5cnccn5)cc4)n1	CHEMBL1092000	460			Br.CS(=O)(=O)N(c1cccc(c1)C(=O)N[C@@H](Cc2ccccc2)[C@H](O)CNCc3cccc(c3)C(F)(F)F)c4ccccn4	CHEMBL1788375	4570
CCNc1cc(cc(N2CCCCS2(=O)=O)c1C)C(=O)N[C@@H](Cc3ccccc3)[C@H](O)CNCc4cccc(c4)C(F)(F)F	CHEMBL508753	23			COc1ccc2C(=CC(=O)Oc2c1)CC(=O)Nc3cc(Br)ccc3N4CCN(CC4)C(=O)OC(C)(C)C	CHEMBL205309	93			CN1C(=NC(C1=O)(c2cccc(c2)c3cncnc3)c4cc(C)sc4Cl)N	CHEMBL1824352	470			C[C@@H](NC(=O)c1cc(cc(c1)c2n[nH]c(n2)[C@](C)(N)Cc3ccccc3)N(C)S(=O)(=O)C)c4ccc(F)cc4	CHEMBL1092147	4740
CS(=O)(=O)N(c1ccccc1)c2cccc(c2)C(=O)N[C@@H](Cc3ccccc3)[C@H](O)CNCc4cccc(c4)C(F)(F)F	CHEMBL1210340	23			CS(=O)(=O)Oc1cc(nc(c1)C(=O)N2COC[C@@H]2c3ccccc3)C(=O)N[C@@H](Cc4ccccc4)[C@H](O)C(=O)Nc5cccc(c5)c6nn[nH]n6	CHEMBL399840	96			C[C@H](Cc1cc2cc(ccc2nc1N)c3ccccc3C)C(=O)NCc4cnccn4	CHEMBL1821824	490			CC(C)[C@H](NC(=O)[C@H](C)C[C@H](O)[C@@H]1CCCCCC[C@H](NC(=O)OC(C)(C)C)C(=O)N[C@@H](C)C(=O)N1)C(=O)NCc2ccncc2	CHEMBL370185	4925
CC(C)[C@@H](NC(=O)C[C@@H](O)[C@H](COCc1ccccc1)NC(=O)c2cc(cc(c2)C(=O)N[C@@H](C)c3ccccc3)N(C)S(=O)(=O)C)C(=O)NCc4ccc(cc4)C(=O)O	CHEMBL443909	24			CCOCCCNC(=O)c1cc(NC(=O)Nc2cccc(Cl)c2)ccc1N(C)C	CHEMBL190644	97			CCNc1cc(N2CCCC2=O)c(F)c(c1)C(=O)N[C@@H](Cc3ccccc3)[C@H](O)CNCc4cccc(c4)C(F)(F)F	CHEMBL445734	519			CSCC[C@H](NC(=O)[C@@H](NC(=O)C)C(C)C)C(=O)NC(CC(C)C)C(O)CC(=O)N[C@@H](C)C(=O)N[C@@H](C)C(=O)N[C@@H](CCC(=O)O)C(=O)N[C@@H](Cc1ccccc1)C(=O)O	CHEMBL90615	5000
CC(C)c1ccc2OC(C)(C)C[C@H](NC[C@@H](O)[C@@H]3C[C@H](C)CCCCCCCCC(=O)N(C)[C@@H](C)C(=O)N3)c2c1	CHEMBL558488	24			CN1C(=NC(C1=O)(c2cccc(c2)c3cccnc3)c4ccnc(C)c4)N	CHEMBL598257	100			COc1ncccc1c2cccc(c2)C3(N=C(N)N(C)C3=O)c4ccc(OC(F)(F)F)cc4	CHEMBL567259	520			CSCC[C@H](NC(=O)[C@@H](NC(=O)OC(C)(C)C)C(C)C)C(=O)NC(CC(C)C)[C@@H](O)CC(=O)N[C@H](C(C)C)C(=O)NCc1cccc(OCC(=O)O)c1	CHEMBL51188	5000
CN1C(=N[C@](C1=O)(c2ccc(OC(F)F)cc2)c3ccc(F)c(c3)C#CC4CC4)N	CHEMBL1270335	24			CN1C(=NC(C1=O)(c2cccc(c2)c3cncnc3)c4cnn(C)c4)N	CHEMBL1824133	100			COc1cccc(CNC[C@H](O)[C@H](Cc2cc(F)cc(F)c2)NC(=O)c3cc(cc(c3)\C(=N/OCC=C)\C)C(=O)NC(C)c4ccc(F)cc4)c1	CHEMBL555518	530			Nc1cccc(Cn2c(ccc2c3ccccc3)c4ccccc4)n1	CHEMBL1092879	5200
CS[C@H]1CC[C@@](CN1)(NC[C@@H](O)[C@H](Cc2cc(F)cc(F)c2)NC(=O)C)c3cccc(c3)C(C)(C)C	CHEMBL569608	24			COc1ccc(cc1)C2(N=C(N)N3CCCN=C23)c4cccc(c4)c5cncnc5	CHEMBL582828	100			CCN1CCN2CCS(=O)(=O)N(C)C3C=C(C=C1C23)C(=O)N[C@@H](Cc4ccccc4)[C@H](O)CNC5CC5	CHEMBL561095	550			Oc1cc(O)c2Oc3c(Oc2c1)c(O)cc4Oc5c(O)cc(O)cc5Oc34	CHEMBL559870	5350
O[C@@H]([C@H](Cc1ccccc1)NC(=O)c2cc(I)cc(n2)C(=O)N3COC[C@@H]3c4ccccc4)C(=O)Nc5cccc(c5)c6nn[nH]n6	CHEMBL504917	24			CON[C@H]1CC[C@@](CN1)(NC[C@@H](O)[C@H](Cc2cc(F)cc(F)c2)NC(=O)C)c3cccc(c3)C(C)(C)C	CHEMBL570982	100			CCCOc1ccc(cc1)c2ccc(c3ccccc3Cl)n2CC(=O)\N=C(\N)/NCc4occc4	CHEMBL404341	558			CN(C)c1cccc(CNC[C@@H](O)[C@H](Cc2ccccc2)NC(=O)[C@@H]3CN(Cc4cc(F)c(F)cc4F)C(=O)N3)c1	CHEMBL410865	5590
CC(C)C[C@H](NC(=O)[C@@H](NC(=O)[C@@H](N)CNC(=O)C1=C(F)C(=O)NC(=O)N1)C(C)C)C(=O)N[C@@H](Cc2ccccc2)[C@@H](O)C(=O)NC3(CCCCC3)c4ccccc4	CHEMBL1817776	24.8			O=C(Nc1cc(ccc1N2CCN(CCCCCN3C(=O)c4ccccc4C3=O)CC2)c5ccccc5)c6cccc7ccccc67	CHEMBL379067	100			N\C(=N\C(=O)Cn1c(ccc1C23CC4CC(CC(C4)C2)C3)c5ccccc5)\NCCc6cccs6	CHEMBL272765	559			NC(=N)NC(=O)Cn1c(ccc1c2ccc(NC(=O)c3cccc(Br)c3)cc2)c4ccccc4	CHEMBL252189	5600
CN1C(=N[C@](C1=O)(c2ccc(OC(F)F)cc2)c3cccc(c3)C#CC4CC4)N	CHEMBL1271246	25			CCNc1cc(cc(c1)C(=O)N[C@@H](Cc2ccccc2)[C@H](O)CNCc3cccc(OC(F)(F)F)c3)N4CCCCS4(=O)=O	CHEMBL409753	102			CC(=O)N[C@@H](Cc1cc(F)cc(F)c1)[C@H](O)CNC2(CCCCC2)c3cccc(c3)C4CCOCOC4	CHEMBL1209286	560			COc1ccc(cc1)C(Cc2cc(ccc2OC)[N+](=O)[O-])c3c[nH]c(N)n3	CHEMBL494015	5700
O[C@H](CNCc1cccc(c1)C(F)(F)F)[C@H](Cc2ccccc2)NC(=O)c3cccc(c3)N(c4cccnc4)S(=O)=O	CHEMBL1210352	25			CCN(CCCCCCNC1=CC(=O)C(=CC1=O)NCCCCCCN(CC)Cc2ccccc2OC)Cc3ccccc3OC	CHEMBL231160	108			CCCOc1ccc(cc1)c2csc(c2CC(=O)NC(=N)N)c3ccccc3Cl	CHEMBL391087	590			O[C@@H](CN(Cc1ccccc1)S(=O)(=O)c2ccc(Cl)cc2)CN3CCN(CC3)C(c4ccccc4)c5ccccc5	CHEMBL1277921	6300
Cc1c(cccc1C(=O)N[C@@H](Cc2ccccc2)[C@H](O)CNCc3cccc(c3)C(F)(F)F)N(c4ccccc4)S(=O)(=O)C	CHEMBL1210354	26			C[C@@H](NC(=O)c1cc(cc(c1)c2ccccc2C(=O)C)C(=O)N[C@@H](Cc3ccccc3)[C@H](O)CNc4ccccc4)c5ccccc5	CHEMBL400916	110			Nc1cccc(Cn2c(ccc2c3ccc(cc3)C(=O)NCC=C)c4ccccc4)n1	CHEMBL1092227	590			CCCN(CCC)C(=O)c1cccc(c1)C(=O)N[C@@H](Cc2cc(F)cc(F)c2)[C@@H](O)C[C@@H](CC)C(=O)N[C@H]3C[C@H](C[C@H](C3)OC)OC	CHEMBL295109	6600
CCc1c[nH]c2c(cc(cc12)C(=O)N[C@@H](Cc3ccccc3)[C@H](O)CNCc4cccc(c4)C(F)(F)F)N5CCCC5=O	CHEMBL447220	26			CC(=O)N[C@@H](Cc1cc(F)cc(F)c1)[C@H](O)CNC2(CCCCC2)c3cccc(c3)c4cscn4	CHEMBL1209055	110			NC(=NC(=O)Cn1c(ccc1C23CC4CC(CC(C4)C2)C3)c5ccccc5)N	CHEMBL402330	600			NC(=NC(=O)Cc1c(csc1c2ccc(OCCc3cn[nH]c3)cc2)c4ccccc4Cl)N	CHEMBL393559	6900
CCn1cc2CCS(=O)(=O)N(C)c3cc(cc1c23)C(=O)N[C@@H](Cc4ccccc4)[C@@H](O)CNCC#C	CHEMBL554281	26			CC[C@H](C)[C@H](NC(=O)C)C(=O)N[C@@H](C)C(=O)N[C@@H](CC(C)C)[C@@H](O)CC(=O)N[C@@H](Cc1ccc(O)cc1)C(=O)NCc2cccc(c2)C(=O)O	CHEMBL1791012	110			CCCOc1ccc(cc1)c2scc(c2CC(=O)N=C(N)N)c3ccccc3Cl	CHEMBL237062	630			CC(C)CC1(C)NC(=N)N(Cc2ccc(CNC(=O)Nc3ccc(cc3)C#N)cc2)C1=O	CHEMBL584963	7000
CC(C)c1cccc(CNC[C@@H](O)[C@@H]2Cc3cccc(OCCCCNc4cc(cc(C)n4)C(=O)N2)c3)c1	CHEMBL601681	27			CCCCCOc1ccc(cc1)c2ccc(c3ccccc3Cl)n2Cc4ccc(OCCO)c(N)n4	CHEMBL1093807	110			CN1C(=NC(C1=O)(c2ccncc2)c3cccc(c3)c4cocc4)N	CHEMBL1090025	630			CN(c1cc2COC(=O)[C@](C)(N)Cc3cccc(CCC(CCc(c2)n1)c4ccccc4)c3)S(=O)(=O)C	CHEMBL235854	7000
CCC[C@H]1CN(Cc2ccc(CN3C(=N)NC(CCC4CCCCC4)(CC5CCCCC5)C3=O)cc2)C(=O)N1	CHEMBL583875	27			CCCN(CCC)C(=O)c1cc(C)cc(c1)C(=O)N[C@@H](Cc2cc(F)cc(F)c2)[C@H](O)[C@H]3C[C@H](CCN3)OCCOC	CHEMBL257645	110			CC(=O)N[C@@H](Cc1cc(F)cc(F)c1)[C@H](O)CNC2(CC2)c3cc(ccn3)C(C)(C)C	CHEMBL1257418	640			OC(=O)c1cc(ccc1Cl)c2oc(\C=N\Nc3nc(Nc4ccc(F)cc4)nc(n3)N5CCOCC5)cc2	CHEMBL1164540	7100
CCCCS(=O)(=O)C[C@@H](NC(=O)OCCNC(=O)C)C(=O)N[C@@H](Cc1cc(F)cc(F)c1)[C@H](O)CNCc2cccc(CC)c2	CHEMBL391145	27			CCNc1cc(cc(N2CCCC2=O)c1OC)C(=O)N[C@@H](Cc3ccccc3)[C@H](O)CNCc4cccc(c4)C(F)(F)F	CHEMBL443509	110			CCNc1cc(cc(c1)C(=O)N[C@@H](Cc2ccccc2)[C@H](O)CNC3CCSCC3)N4CCCC4=O	CHEMBL252058	650			C(CCCNc1c2CCCCc2nc3ccccc13)CCCNc4c5CCCCc5nc6ccccc46	CHEMBL32823	7500
CCCN(CCC)C(=O)c1cc(cc(c1)C(=O)N[C@@H](Cc2cc(F)cc(F)c2)[C@@H](O)CNCc3cccc(OC)c3)\C(=N/O)\C	CHEMBL540729	27			CCCC(CCC)S(=O)(=O)CC(NC(=O)OCc1ccccc1)C(=O)N[C@@H](Cc2ccccc2)[C@H](O)CNCc3cccc(OC)c3	CHEMBL253800	112			Cc1oc(CN\C(=N/C(=O)Cn2c(ccc2C34CC5CC(CC(C5)C3)C4)c6ccccc6)\N)nn1	CHEMBL272766	665			CN1C(=NC(C)(CC1=O)c2ccc(Cl)c(Cl)c2)N	CHEMBL239425	7500
CCn1cc2CCS(=O)(=O)N(C)c3cc(cc1c23)C(=O)N[C@@H](Cc4ccccc4)[C@H](O)CNC5CCOCC5	CHEMBL559355	27			CCN(Cc1ccccc1)Cc2ccc(cc2)C3=Cc4ccc(OCCNC(=O)CCc5ccc(F)c(F)c5)cc4OC3=O	CHEMBL271710	114			Brc1ccc(N2CCNCC2)c(NC(=O)C3=Cc4ccccc4OC3=O)c1	CHEMBL1165089	670			CC(C)CNC(=O)[C@H](C)C[C@H](O)[C@H](CC(C)C)NC(=O)[C@H](Cc1ccccc1)NC(=O)c2ccc3OCOc3c2	CHEMBL1088138	8070
CCc1cn2CCS(=O)(=O)N(C)c3cc(cc1c23)C(=O)N[C@@H](Cc4ccccc4)[C@H](O)CNC(C)(C)CCCC(C)C.OC=O	CHEMBL500275	27.38			CCc1cn2CCS(=O)(=O)N(C)c3cc(cc1c23)C(=O)N[C@@H](Cc4ccccc4)[C@@H](O)CNCC#C	CHEMBL562290	118			O=C(CSc1nc2ccc(Nc3nc(nc(n3)N4CCCC4)N5CCCC5)cc2s1)NCc6occc6	CHEMBL1271091	690			NC(=NC(=O)Cc1c(csc1c2ccccc2)c3ccccc3)N	CHEMBL236850	8300
CCn1ncc2c(cc(cc12)C(=O)N[C@@H](Cc3ccccc3)[C@H](O)CNCc4cccc(c4)C(F)(F)F)N5CCCC5=O	CHEMBL448592	28			COC[C@H](NC(=O)OC(C)(C)C)C(=O)N[C@@H](C)C(=O)N[C@@H](Cc1ccccc1)[C@@H](O)C[C@@H](C)C(=O)N[C@@H](C(C)C)C(=O)NCc2ccncc2	CHEMBL82594	118			NC(=N)NC(=O)Cn1c(ccc1c2csc3ccccc23)c4ccc(Oc5ccccc5)cc4	CHEMBL254891	700			O=C1C=C(C(=O)c2ccccc12)c3ccccc3	CHEMBL1762552	9330
CSCC[C@H](NC(=O)[C@@H](NC(=O)OC(C)(C)C)C(C)C)C(=O)N[C@@H](Cc1ccccc1)[C@@H](O)C[C@@H](C)C(=O)N[C@@H](C(C)C)C(=O)NCc2ccccc2	CHEMBL312277	28			CC(=O)N[C@@H](Cc1cc(F)cc(F)c1)[C@H](O)CNC2(CCCCC2)c3cccc(c3)c4cocc4	CHEMBL1208998	120			CCOc1cc(cc(c1)C(=O)N[C@@H](Cc2ccccc2)[C@H](O)CNCc3cccc(OC(F)(F)F)c3)N4CCCCS4(=O)=O	CHEMBL409752	711			CC(=O)N[C@@H](Cc1cc(F)cc(F)c1)[C@H](O)CNC2(CC2)c3nc(CC(C)(C)C)cs3	CHEMBL1257893	9360
CCc1cn2CCS(=O)(=O)N(C)c3cc(cc1c23)C(=O)N[C@@H](Cc4ccccc4)[C@H](O)CNC5CCCCC5.OC=O	CHEMBL504197	28.85			CC(C)[C@@H](NC(=O)C[C@@H](O)[C@H](COCc1cc(F)cc(F)c1)NC(=O)c2cc(cc(c2)C(=O)N[C@@H](C)c3ccccc3)N(C)S(=O)(=O)C)C(=O)NCc4ccc(cc4)C(=O)O	CHEMBL506759	120			CC(=O)N[C@@H](Cc1cc(F)cc(F)c1)[C@H](O)CNC2(CC2)c3cc(CC(C)(C)C)c[n+]([O-])c3	CHEMBL1257533	720			CCCCNC(=O)[C@@H](NC(=O)[C@@H]1OCC[C@H]1[C@H](O)[C@H](CC(C)C)NC(=O)[C@H](CCSC)NC(=O)[C@H](CC(C)C)NC(=O)C)C(C)C	CHEMBL364664	9560
C[C@@H](NC(=O)c1cc(cc(c1)C(=O)N[C@@H](Cc2ccccc2)C(O)CNC3CC3)N(C)S(=O)(=O)C)c4ccccc4	CHEMBL221454	29			CN1C(=NC(C1=O)(c2ccc(F)c(c2)c3cncnc3)c4cnn(CC(F)(F)F)c4)N	CHEMBL1824136	120			CC(=O)N[C@@H](Cc1cc(F)cc(F)c1)[C@H](O)CNC2(CCCCC2)c3cccc(c3)S(=O)(=O)C	CHEMBL1208936	720			C[C@@H](NC(=O)c1cc(cc(c1)c2ccccc2C(=O)C)C(=O)N[C@H](CO)Cc3ccccc3)c4ccccc4	CHEMBL252351	9900
CC(C)[C@H](NC(=O)[C@@H](N)CNC(=O)C1=C(F)C(=O)NC(=O)N1)C(=O)N[C@@H](CC2CCCCC2)C(=O)N[C@@H](Cc3ccccc3)[C@@H](O)C(=O)NC4(CCCC4)c5ccccc5	CHEMBL1817746	29			CN1C(=NC(C1=O)(c2cccc(c2)c3cccnc3)c4ccc5OCCc5c4)N	CHEMBL566414	120			CC(=O)N[C@@H](Cc1cc(F)cc(F)c1)[C@H](O)CNC2(CCCCC2)c3cccc(c3)N4CCCOCC4=O	CHEMBL1209285	750			COC(=O)[C@@H]1CCCN1C(=O)[C@@H](Cc2ccccc2)N(C)C(=O)[C@H](C)NC(=O)[C@@H](NC(=O)C[C@H](O)[C@H](CC(C)C)NC(=O)[C@H](CC(=O)N)NC(=O)[C@H](CC(C)C)NC(=O)[C@H](OC(=O)[C@@H](OC(=O)[C@H](C(C)C)N(C)C)C(C)C)C(C)C)[C@@H](C)O	CHEMBL567893	10000
CC(C)C[C@H](NC(=O)[C@@H](NC(=O)[C@@H](N)CNC(=O)c1nn[nH]n1)C(C)C)C(=O)N[C@@H](Cc2ccccc2)[C@@H](O)C(=O)NS(=O)(=O)C(F)(F)F	CHEMBL270172	29.9			COC(=O)c1cc(NC(=O)[C@@H](NC(=O)C[C@H](O)[C@H](Cc2cc(F)cc(F)c2)NC(=O)C(O)c3ccccc3c4ccccc4)C(C)C)cc(c1)C(=O)OC	CHEMBL143687	120			CCCOc1ccc(cc1)c2ccc(c3ccccc3Cl)n2CC(=O)\N=C(\N)/NCc4cccs4	CHEMBL270154	752			CSCC[C@H](NC(=O)[C@@H](NC(=O)OC(C)(C)C)C(C)C)C(=O)N[C@@H](COCc1cc(F)cc(F)c1)[C@@H](O)C[C@@H](C)C(=O)N[C@@H](C(C)C)C(=O)NCc2ccccc2	CHEMBL1076907	10000
CC(C)[C@H](C[C@H](O)[C@H](COCc1ccccc1)NC(=O)c2cc(cc(c2)C(=O)N[C@H](C)c3ccccc3)N(C)S(=O)(=O)C)C(=O)N[C@@H](C(C)C)C(=O)NCc4ccccc4	CHEMBL1644461	30			COc1ccc(cc1C2CCCC2)C3(N=C(N)N(C)C3=O)c4cccc(c4)c5cccnc5	CHEMBL565790	120			CCCNC(=O)c1cc(cc(c1)C(=O)N[C@@H](Cc2ccccc2)[C@H](O)CNCc3cccc(OC)c3)C#N	CHEMBL230314	770
CC(C)CCn1cc(cn1)C2(N=C(N)N(C)C2=O)c3cccc(c3)c4cncnc4	CHEMBL1824139	30			O=C(CSc1nc2ccc(Nc3nc(nc(n3)N4CCCC4)N5CCCC5)cc2s1)Nc6ccccc6	CHEMBL1270884	120			C[C@@]1(N)Cc2cccc(CC[C@@H](NC(=O)c3cc(COC1=O)cc(c3)c4occn4)c5ccccc5)c2	CHEMBL251307	780
CC(C)Cn1cc(cn1)C2(N=C(N)N(C)C2=O)c3cccc(c3)c4cncnc4	CHEMBL1824138	30			CCN(Cc1ccccc1)Cc2ccc(cc2)C3=Cc4ccc(OCCNC(=O)\C=C\c5cc(F)cc(F)c5)cc4OC3=O	CHEMBL271709	121			CC(=O)c1ccc(Oc2ccc(cc2)c3ccc(c4cccc(c4)C#N)n3CC(=O)NC(=N)N)cc1	CHEMBL400087	800
CCC(C)C(NC(=O)[C@H](CCC(=O)O)NC(=O)[C@H](CCC(=O)O)NC(=O)[C@@H](NC(=O)C(N)CCCN)C(O)CC)C(=O)N[C@@H](CO)C(=O)N[C@@H](CCC(=O)O)C(=O)N[C@@H](C(C)C)C(=O)N[C@@H](CCSC)C(=O)N[C@@H](CC(C)C)[C@@H](O)CC(=O)N[C@@H](C(C)C)C(=O)N[C@@H](C)C(=O)N[C@@H](CCC(=O)O)C(=O)N[C@@H](Cc1ccccc1)C(=O)O	CHEMBL441584	30			COc1ccccc1N(c2cccc(c2)C(=O)N[C@@H](Cc3ccccc3)[C@H](O)CN[C@@H](C)C(=O)NC4CCCCC4)S(=O)(=O)C	CHEMBL1210341	126			C[C@@H](NC(=O)c1cc(cc(c1)c2ccc(Cl)cc2)C(=O)N[C@@H](Cc3ccccc3)[C@H](O)CNC4CC4)c5ccccc5	CHEMBL443447	811
CCc1cc(cc(CC)n1)[C@@]2(N=C(N)N(C)C2=O)c3cccc(c3)c4cncnc4	CHEMBL590730	30			CCNc1cc(cc(c1)C(=O)N[C@@H](Cc2occc2)[C@H](O)CNCc3cccc(OC)c3)N4CCCCS4(=O)=O	CHEMBL254272	129			COc1cccc(CNC[C@@H](O)[C@H](Cc2cc(F)cc(F)c2)NC(=O)c3cc(cc(c3)\C(=N/OCc4ccccc4)\C)N5CCCCS5(=O)=O)c1	CHEMBL541738	821
CCCC#Cc1cc(ccc1F)[C@]2(N=C(N)N(C)C2=O)c3ccc(OC(F)F)c(C)c3	CHEMBL1270834	30			CC(C)c1cccc(CNC[C@H](O)[C@H](Cc2ccccc2)NC(=O)[C@@H]3CCC[C@@H](C3)C(C)(C)N4CCCC4=O)c1	CHEMBL1077236	130			CC(=O)N[C@@H](Cc1cc(F)cc(F)c1)[C@H](O)CNC2(CCCN(C2)C(=O)OCc3ccccc3)c4cccc(c4)C(C)(C)C	CHEMBL570165	860
CCCC#Cc1cccc(c1)[C@]2(N=C(N)N(C)C2=O)c3ccc(OC(F)F)cc3	CHEMBL1271036	30			CCCOc1ccc(cc1)c2ccc(c3ccccc3Cl)n2CC(=O)\N=C(\N)/NCCCC(=O)O	CHEMBL273186	130			CCc1cn2CS(=O)(=O)N(C)c3cc(cc1c23)C(=O)N[C@@H](Cc4ccccc4)[C@H](O)CNC	CHEMBL561838	868
CCCN(CCC)C(=O)c1cc(cc(c1)C(=O)N[C@@H](Cc2ccccc2)[C@H](O)CNCc3cccc(OC)c3)C(=O)O	CHEMBL394595	30			NC1=NC(\C\2=N\CCCCCN12)(c3ccc(OC(F)(F)F)cc3)c4cccc(c4)c5cccnc5F	CHEMBL568960	130			CC(=O)N[C@@H](Cc1cc(F)cc(F)c1)[C@H](O)CNC2(CC2)c3ccn(CC(C)(C)C)n3	CHEMBL1258003	870
CCCN(CCC)C(=O)c1cc(Sc2ccc(OC)cc2)cc(c1)C(=O)N[C@@H](Cc3cc(F)cc(F)c3)[C@@H](O)CNCc4cccc(OC)c4	CHEMBL553571	30			CCCN(CCC)C(=O)c1cc(cc(c1)C(=O)OCC)C(=O)N[C@@H](Cc2ccccc2)[C@H](O)CNCc3cccc(OC)c3	CHEMBL394596	132			CC(C)C[C@H](NC(=O)[C@@H](NC(=O)[C@@H](N)CNC(=O)c1nn[nH]n1)C(C)C)C(=O)NCCC(=O)Nc2cccc(c2)C(=O)O	CHEMBL1645523	870
CCCN(CCC)C(=O)c1cccc(c1)C(=O)N[C@@H](Cc2cc(F)cc(F)c2)[C@@H](O)C[C@@H](C)C(=O)NCC(C)C	CHEMBL42908	30			CC(=O)N[C@@H](Cc1cc(F)cc(F)c1)[C@H](O)CNC2(CCCCC2)c3onc(CC(C)(C)C)c3	CHEMBL1258687	139			O[C@H](CNCc1cccc(c1)C(F)(F)F)[C@H](Cc2ccccc2)NC(=O)c3cccc(c3)N4c5ccccc5OS4(=O)=O	CHEMBL1210350	910
CCN1c2cc(cc3c(CC)cn(CCS1(=O)=O)c23)C(=O)N[C@@H](Cc4ccccc4)[C@H](O)CNC5CCCCC5	CHEMBL558582	30			CO[C@@H](COCc1ccc(OC)cc1)C[C@H](O)[C@H](COc2cc(F)cc(F)c2)NC(=O)c3cc(cc(c3)C(=O)N[C@H](C)c4ccccc4)N(C)S(=O)(=O)C	CHEMBL572692	140			CCCN(CCC)C(=O)c1cc(C)cc(c1)C(=O)N[C@@H](Cc2cc(F)cc(F)c2)[C@H](O)[C@H]3CN(Cc4ccccc4C#N)CCN3	CHEMBL455237	970
CCn1cc(cn1)C2(N=C(N)N(C)C2=O)c3ccc(F)c(c3)c4cccnc4F	CHEMBL1824336	30			CO[C@H]1CC[C@@](CN1)(NC[C@@H](O)[C@H](Cc2cc(F)cc(F)c2)NC(=O)C)c3cccc(c3)C(C)(C)C	CHEMBL571419	140			Nc1cccc(Cn2c(ccc2c3ccccc3Cl)c4ccc(Nc5cncnc5)cc4)n1	CHEMBL1093806	980
CCn1cc(cn1)C2(N=C(N)N(C)C2=O)c3cccc(c3)c4cccnc4F	CHEMBL1824144	30			COC[C@H]1CCCN1C(=O)c2cncc(c2)C(=O)N[C@@H](Cc3cc(F)cc(F)c3)[C@H](O)[C@@H]4NCCN(Cc5ccccc5)C4=O	CHEMBL511110	140			C[C@@H](NC(=O)c1cc(C(=O)N[C@@H](Cc2ccccc2)[C@H](O)CNC3CC3)c4cc(C)oc4c1)c5ccccc5	CHEMBL463865	998
CN1C(=N[C@@](C1=O)(c2cccc(c2)c3cccnc3F)c4cnn(CC(F)(F)F)c4)N	CHEMBL1824338	30			CC(C)(C)c1cccc(CNC[C@@H](O)[C@H](Cc2cc(F)cc(F)c2)NC(=O)[C@@H]3CN(Cc4cc(F)cc(F)c4)C(=O)N3)c1	CHEMBL260621	150			[Cl-].Clc1ccc(NC(=O)c2cccc(NC(=O)C[n+]3ccccc3)c2)cc1	CHEMBL1163225	1000
CN1C(=N[C@](C1=O)(c2ccc(OC(F)F)cc2)c3ccc(F)c(OCCC=C(F)F)c3)N	CHEMBL1270436	30			CCCN(CCC)C(=O)c1cc(C)cc(c1)C(=O)N[C@@H](Cc2cc(F)cc(F)c2)[C@H](O)[C@H]3C[C@H](CN3)OCc4ccccc4	CHEMBL270359	150			Brc1ccc(N2CCNCC2)c(NC(=O)c3cccc4ccccc34)c1	CHEMBL378032	1000
CN1C(=N[C@](C1=O)(c2ccc(OC(F)F)cc2)c3cccc(OCC(F)F)c3)N	CHEMBL1270338	30			CCCN1[C@@H](Cc2cc(C[C@@H]3CS(=O)(=O)C[C@H](NCc4cccc(c4)C(C)C)[C@H]3O)ccc2O)COC1=O	CHEMBL1615184	150			C[C@@H](NC(=O)c1cc(cc(c1)C(=O)N[C@@H](Cc2ccccc2)C(O)C(=O)NCC3CCN(Cc4ccccc4)CC3)N(C)S(=O)(=O)C)c5ccc(F)cc5	CHEMBL507252	1000
CN1C(=N[C@](C1=O)(c2ccc(OC(F)F)cc2)c3cccc(OCCC=C(F)F)c3)N	CHEMBL1270529	30			CCCOc1ccc(cc1)c2scc(c2CC(=O)\N=C(\N)/NCCCO)c3ccccc3Cl	CHEMBL237063	150			CC(=O)N[C@@H](Cc1cc(F)cc(F)c1)[C@H](O)CNC2(CCCCC2)c3cccc(c3)N4CCCNC4=O	CHEMBL1209284	1000
CN1C(=N[C@](C1=O)(c2ccc(OCCF)cc2)c3cccc(c3)c4cccnc4F)N	CHEMBL1271450	30			CCN(Cc1ccccc1)Cc2ccc(cc2)C3=Cc4ccc(OCCNC(=O)Cc5cc(F)cc(F)c5)cc4OC3=O	CHEMBL26125	150			CC(C)C[C@H](NC(=O)c1cc(cc(c1)C(=O)N[C@H](C)c2ccc(F)cc2)N(C)S(=O)(=O)C)[C@@H](O)C[C@@H](C)C(=O)NN3CCN(Cc4ccccc4)CC3	CHEMBL449152	1000
CN1C(=NC(C1=O)(c2ccncc2)c3cccc(c3)c4cccnc4F)N	CHEMBL1090027	30			COc1ccc(cc1C#N)C2(N=C(N)N(C)C2=O)c3cccc(c3)c4cccnc4	CHEMBL568114	150			CCCN(CCC)C(=O)c1cc(cc(c1)[N+](=O)[O-])C(=O)N[C@@H](Cc2ccccc2)C(O)C(=O)NCC3CCN(Cc4ccccc4)CC3	CHEMBL505994	1000
CN1C(=NC(C1=O)(c2ccsc2)c3ccc(F)c(c3)c4cccnc4F)N	CHEMBL1824357	30			CCN(Cc1ccccc1)Cc2ccc(cc2)C3=Cc4ccc(OCCNC(=O)\C=C\c5ccc(Cl)c(Cl)c5)cc4OC3=O	CHEMBL270248	151			Clc1ccc2c(NCCCCCCCNc3c4Cc5ccccc5c4nc6ccccc36)c7CCCCc7nc2c1	CHEMBL1819176	1000
COc1ccc(cc1)[C@@]2(N=C(N)N(C)C2=O)c3cccc(c3)c4cccnc4F	CHEMBL1271344	30			CC(=O)N[C@@H](Cc1cc(F)cc(F)c1)[C@H](O)CNC2(CCCCC2)c3cn(C[Si](C)(C)C)nn3	CHEMBL1257184	154			CSCC[C@H](NC(=O)[C@@H](NC(=O)C)C(C)C)C(=O)NC(CC(C)C)C(O)CC(=O)N[C@@H](C(C)C)C(=O)N[C@@H](C)C(=O)N[C@@H](CCC(=O)O)C(=O)O	CHEMBL327386	1000
COc1ccc(cc1C)C2(N=C(N)N(C)C2=O)c3cccc(c3)c4cncnc4	CHEMBL566012	30			CCOc1cc(cc(c1)c2ccccc2C#N)C(=O)N[C@@H](Cc3ccccc3)[C@H](O)CNCc4cccc(c4)C(F)(F)F	CHEMBL253866	160			NC1=NC(C2CCCCC2)(C(=O)N1CC3CCCO3)c4ccccc4	CHEMBL592534	1040
COc1cccc(c1)c2cccc(c2)C3(N=C(N)N(C)C3=O)c4ccncc4	CHEMBL1092124	30			COc1ccc(cc1)C2(N=C(N)N(C)C2=O)C34CC5CC(CC(C5)C3)C4	CHEMBL584694	160			CN1C(=NC(C2CCCCC2)(C3CCCCC3)C1=O)N	CHEMBL589163	1080
CSCC[C@H](NC(=O)[C@@H](NC(=O)C)C(C)C)C(=O)N[C@@H](CC(C)C)[C@@H](O)C[C@@H](C(C)C)C(=O)N[C@@H](C)C(=O)N[C@@H](CCC(=O)O)C(=O)N[C@@H](Cc1ccccc1)C(=O)O	CHEMBL446351	30			COc1cccc(CNC[C@H](O)[C@H](Cc2cc(F)cc(F)c2)NC(=O)c3cc(cc(c3)C(=O)NC(C)c4ccc(F)cc4)C(C)O)c1	CHEMBL556626	164			NC1=NC(C2CCCCC2)(C(=O)N1Cc3cc(F)cc(F)c3)c4ccccc4	CHEMBL592533	1080
NC1=NC(C2=NOCCN12)(c3ccc(OC(F)(F)F)cc3)c4cccc(c4)c5cccnc5F	CHEMBL567430	30			CC(=O)N[C@@H](Cc1cc(F)cc(F)c1)[C@H](O)CNC2(CCCCC2)c3cccc(c3)C(C)(C)C#N	CHEMBL1208933	166			CC(=O)N[C@@H](Cc1cc(F)cc(F)c1)[C@H](O)CNC2(CCCCC2)c3cccc(c3)c4occc4	CHEMBL1208997	1100
NC1=Nc2cc(F)c3Oc4cccc(CCN(C5CCCCC5)C(=O)CC[C@@H](C6CCCCC6)N1Cc2c3)c4	CHEMBL1095429	30			CCCOc1ccc(cc1)c2ccc(c3ccccc3Cl)n2CC(=O)\N=C(\N)/NCCC(=O)N	CHEMBL272970	172			COc1ccc(cc1)C(Cc2cc(ccc2OC)[N+](=O)[O-])c3csc(N)n3	CHEMBL466025	1100
CC(C)CCCC(C)NC[C@@H](O)[C@H](Cc1ccccc1)NC(=O)c2cccc(c2)N(c3ccccc3)S(=O)(=O)C	CHEMBL1210431	32			CC(=O)N[C@@H](Cc1cc(F)cc(F)c1)[C@H](O)CNC2(CCCCC2)c3cc(Br)cc(c3)C(C)(C)C	CHEMBL1257649	174			C[C@@H](NC(=O)c1cc(cc(c1)C(=O)N[C@@H](Cc2ccccc2)[C@H](O)CNC3CC3)C#Cc4ccccc4)c5ccccc5	CHEMBL450801	1119
CCCCCOc1cc(cc(c1)C(=O)N[C@@H](Cc2ccccc2)[C@H](O)CN[C@@H](C)C(=O)NC3CCCCC3)N4CCCC4=O	CHEMBL256399	32			COCc1cc2NCCCCOc3cccc(C[C@H](NC(=O)c(c1)c2)[C@H](O)CNC(CF)c4cccc(c4)C(C)(C)C)c3	CHEMBL594709	177			CCCCNC(=O)[C@H](C)C[C@H](O)[C@@H]1COC\C=C\CSC[C@H](NC(=O)C)C(=O)N[C@@H](C)C(=O)N1	CHEMBL212102	1120
CN1C(=N[C@](C1=O)(c2ccc(OC(F)F)cc2)c3ccc(F)c(c3)C#CCCCF)N	CHEMBL1270835	32			C[C@H](NC[C@@H](O)[C@H](Cc1ccccc1)NC(=O)c2cccc(c2)N(Cc3ccccc3)S(=O)(=O)C)C(=O)NC4CCCCC4	CHEMBL1210333	180			COc1ccc2C(=CC(=O)Oc2c1)CC(=O)Nc3cc(Br)ccc3N4CCN(CC4)S(=O)(=O)c5cccs5	CHEMBL205637	1130
CC(=O)N[C@@H](Cc1cc(F)cc(F)c1)[C@H](O)CN[C@]2(CC[C@@H](NC2)C(F)(F)F)c3cccc(c3)C(C)(C)C	CHEMBL570762	33			CCc1cc(c(C)s1)C2(N=C(N)N(C)C2=O)c3cccc(c3)c4cncnc4	CHEMBL1824350	180			CC[C@H](NCC1Cc2cccc(CCCCc3cc(cc(c3)C(=O)N1)N(C)S(=O)(=O)C)c2)C(=O)NCC(C)C	CHEMBL217374	1139
CCNc1cc(cc(c1)C(=O)N[C@@H](Cc2ccccc2)[C@H](O)CNC(C)CCCC(C)C)N3CCCC3=O	CHEMBL252263	33			CCCCNC(=O)[C@H](C)C[C@H](O)[C@@H]1CSC\C=C\CS[C@H]2CCCN[C@H]2C(=O)N[C@@H](C)C(=O)N1	CHEMBL210240	190			CCNc1cc(cc2N(C)S(=O)(=O)CCCc12)C(=O)N[C@@H](Cc3ccccc3)[C@H](O)CNC4CCOCC4	CHEMBL564712	1185
Cc1ccccc1c2ccc3nc(N)c(CCC(=O)NCC4CCCCC4)cc3c2	CHEMBL1821812	34			NC1=NC(C2=NCCCN12)(c3ccc4OCCOc4c3)c5cccc(c5)c6cccnc6F	CHEMBL566968	190			[Na+].[Na+].[Na+].CC(C)C(\C=C/[C@@H](C)[C@H]1CC[C@H]2[C@@H]3C[C@H](OS(=O)(=O)[O-])[C@H]4C[C@H](OS(=O)(=O)[O-])[C@H](C[C@]4(C)[C@H]3CC[C@]12C)OS(=O)(=O)[O-])C(C)C	CHEMBL1224769	1200
CCc1cn2CCS(=O)(=O)N(C)c3cc(cc1c23)C(=O)N[C@@H](Cc4ccccc4)[C@H](O)CNCc5ccccc5.OC=O	CHEMBL448945	34			C[C@@H](NC(=O)c1cc(cc(c1)C(=O)N[C@@H](Cc2ccccc2)[C@H](O)CNCc3ccc4ccn(c4c3)S(=O)(=O)C)N(C)S(=O)(=O)C)c5ccccc5	CHEMBL253930	200			O[C@@H]([C@H](Cc1cc(F)cc(F)c1)NC(=O)[C@@H]2CN(Cc3nccs3)C(=O)C2)[C@H]4C[C@H](CN4)OCc5ccccc5	CHEMBL430039	1200
CCn1nnc2c(cc(cc12)C(=O)N[C@@H](Cc3ccccc3)[C@H](O)CNCc4cccc(c4)C(F)(F)F)N5CCCC5=O	CHEMBL449938	34			C[C@@H](NC(=O)c1cc(cc(c1)C(=O)OCC(N)(CO)Cc2ccccc2)N(C)S(=O)(=O)C)c3ccc(F)cc3	CHEMBL375217	200			C[C@@H](NC(=O)c1cc(cc(c1)c2cn(Cc3ccccc3)nn2)C(=O)N[C@@H](Cc4ccccc4)[C@H](O)CNC5CC5)c6ccccc6	CHEMBL449578	1256
NC1=Nc2ccc3Oc4cccc(CCCN(C5CCCCC5)C(=O)CC[C@@H](C6CCCCC6)N1Cc2c3)c4	CHEMBL1098734	34			CN1C(=N[C@](C1=O)(c2ccc(OC(F)F)cc2)c3cccc(OC(F)F)c3)N	CHEMBL1270241	200			CC(=O)N[C@@H](Cc1cc(F)cc(F)c1)[C@H](O)CNC2(CC2)c3cccc(c3)C(=C)C(F)(F)F	CHEMBL1270262	1300
CC(C)C[C@H](NC(=O)[C@@H](NC(=O)[C@@H](N)CNC(=O)C1=C(F)C(=O)NC(=O)N1)C(C)C)C(=O)N[C@@H](Cc2ccccc2)[C@@H](O)C(=O)N[C@H](C)c3ccccc3	CHEMBL1817733	34.8			N\C(=N\C(=O)Cc1c(csc1c2ccc(cc2)C(=O)NCC(F)(F)F)c3ccccc3Cl)\NCCCO	CHEMBL237283	200			CC(=O)N[C@@H](Cc1cc(F)cc(F)c1)[C@H](O)CNC2(CCCCC2)c3cccc(c3)N4CCOC4=O	CHEMBL1209165	1300
C[C@H](Cc1cc2cc(ccc2nc1N)c3ncccc3C)C(=O)NCCC(C)(C)C	CHEMBL1821826	35			CCCOc1ccc(cc1)c2ccc(c3ccccc3Cl)n2CC(=O)\N=C(\N)/NCc4ccc(F)c(F)c4F	CHEMBL269943	203			CN1C(=NC(C1=O)(c2ccc(OC(F)(F)F)cc2)c3cccc(c3F)c4cncnc4)N	CHEMBL566404	1360
CC[C@H](C)[C@H](O)C(=O)N[C@@H](C)C(=O)N[C@@H](Cc1ccccc1)[C@@H](O)C[C@@H](C)C(=O)N[C@@H](C(C)C)C(=O)NCc2ccncc2	CHEMBL1790644	35			CC(=O)N[C@@H](Cc1cc(F)cc(F)c1)[C@H](O)CN[C@]2(CC[C@@H](NC2)S(=O)(=O)C)c3cccc(c3)C(C)(C)C	CHEMBL567026	210			CCOc1cc(cc(c1)C(=O)N[C@@H](Cc2ccccc2)[C@H](O)CN[C@@H](C)C(=O)NC3CCCCC3)N4CCCC4	CHEMBL403533	1450
CN(c1cc(\C=C/C2CC2)cc(c1)C(=O)N[C@@H](Cc3ccccc3)[C@H](O)CNC4CC4)S(=O)(=O)C	CHEMBL201730	35			O[C@@H]([C@H](Cc1cc(F)cc(F)c1)NC(=O)[C@@H]2CN(Cc3cccnc3)C(=O)C2)[C@H]4C[C@H](CN4)OCc5ccccc5	CHEMBL270822	219			COc1ccc2cc(ccc2c1)c3cn(C[C@@H]4Cc5c(CN4)[nH]c6ccccc56)nn3	CHEMBL1272322	1490
CS(=O)(=O)N(c1ccccc1)c2cc(cc(c2)C(=O)N[C@@H](Cc3ccccc3)[C@H](O)CNCc4cccc(c4)C(F)(F)F)N5CCCC5=O	CHEMBL1210363	35			CCCCCOc1ccc(cc1)c2ccc(c3ccccc3Cl)n2Cc4ccc(NCCCO)c(N)n4	CHEMBL1089204	220			CCc1cn2CCS(=O)(=O)N(C)c3ccc(C(=O)N[C@@H](COc4cc(F)cc(F)c4)[C@@H](O)C[C@H](COCc5ccc(OC)cc5)OC)c1c23	CHEMBL583304	1500
CCNc1cc(cc(c1)C(=O)N[C@@H](Cc2ccccc2)[C@H](O)CNC3CCc4ccc(OC)cc34)N5CCCCS5(=O)=O	CHEMBL401475	36			CCS(=O)(=O)c1cc(cc(c1)C(=O)N[C@@H](Cc2ccccc2)[C@H](O)CNCc3cccc(c3)C(F)(F)F)N(c4ccccc4)S(=O)(=O)C	CHEMBL1210364	220			CN1C(=NC(C1=O)(c2ccccc2)C34CC5CC(CC(C5)C3)C4)N	CHEMBL585952	1530
COc1cc2N=C(N)N3Cc2cc1Oc4cccc(CCN(C5CCCCC5)C(=O)CC[C@H]3C6CCCCC6)c4	CHEMBL1095430	36			COC(=O)c1cc(NC(=O)[C@@H](NC(=O)C[C@H](O)[C@@H](COc2cc(F)cc(F)c2)NC(=O)c3cc(cc(c3)C(=O)N[C@@H](C)c4ccccc4)N(C)S(=O)(=O)C)C(C)C)cc(c1)C(=O)OC	CHEMBL508810	220			Oc1ccc(cc1)C2=CC(=O)c3c(O)cc(O)c(c3O2)c4cc(ccc4O)C5=CC(=O)c6c(O)cc(O)cc6O5	CHEMBL63354	1540
COc1ccc(cc1Cl)C2(N=C(N)N(C)C2=O)c3cccc(c3)c4cccnc4	CHEMBL565996	36			COC[C@H]1CCCN1C(=O)c2cc(C)cc(c2)C(=O)N[C@@H](Cc3cc(F)cc(F)c3)[C@H](O)[C@H]4CN(CCN4)S(=O)(=O)C	CHEMBL1097355	220			CCNC1=CC(=CC2C1CCCS(=O)(=O)N2C)C(=O)N[C@@H](Cc3ccccc3)[C@H](O)CNC4CC4	CHEMBL561096	1574
CC(C)[C@H](NC(=O)C[C@H](O)[C@@H](COc1cc(F)cc(F)c1)NC(=O)c2cc(cc(c2)C(=O)N[C@@H](C)c3ccccc3)N(C)S(=O)(=O)C)C(=O)Nc4cc(cc(c4)C(=O)O)C(=O)O	CHEMBL500876	37			C[C@@H](NC(=O)c1cc(cc(c1)c2ccccc2C(=O)C)C(=O)N[C@@H](Cc3ccccc3)[C@H](O)CNCC=C)c4ccccc4	CHEMBL253799	223			CC(=O)N[C@@H](Cc1cc(F)cc(F)c1)[C@H](O)CNC2(CCCCC2)c3oc(cn3)C(C)(C)C	CHEMBL1258802	1580
CC(C)[C@H](O)C(=O)N[C@@H](C)C(=O)N[C@@H](Cc1ccccc1)[C@@H](O)C[C@@H](C)C(=O)N[C@@H](C(C)C)C(=O)NCc2ccccc2	CHEMBL316181	37			O[C@@H]([C@H](Cc1cc(F)cc(F)c1)NC(=O)[C@@H]2CN(Cc3occc3)C(=O)C2)[C@H]4C[C@H](CN4)OCc5ccccc5	CHEMBL404682	225			CC(=O)N[C@@H](Cc1cc(F)cc(F)c1)[C@H](O)CNC2(CCCCC2)c3cccc(c3)n4ccnc4	CHEMBL1209056	1600
CC(=O)N[C@@H](Cc1cc(F)cc(F)c1)[C@H](O)CN[C@@]2(CC[C@@H](CO)CC2)c3cccc(c3)C(C)(C)C	CHEMBL569609	38			CC(C)[C@H](NC(=O)C(O)(CCC(=O)Nc1cc(cc(c1)C(=O)N[C@@H](C)c2ccccc2)N(C)S(=O)(=O)C)CCc3ccccc3)C(=O)Nc4ccccc4	CHEMBL540414	230			OC(=O)C(F)(F)F.Brc1ccc(N2CCNCC2)c(NC(=O)C3=CC(=O)c4ccccc4O3)c1	CHEMBL381272	1600
CCCC[C@H](N)[C@H](Cc1ccsc1)NC(=O)c2cc(NCC3CC3C)nc(c2)N(C)S(=O)(=O)C	CHEMBL440957	38			CCNc1cc(cc(c1)C(=O)N[C@@H](Cc2ccccc2)[C@H](O)CNCc3cnn(CC)c3)N4CCCC4=O	CHEMBL402171	230			CC(=O)N[C@@H](Cc1cc(F)cc(F)c1)[C@H](O)CNC2(CC2)c3ccc(CC(C)(C)C)s3	CHEMBL1257651	1620
CCNc1cc(cc(c1)C(=O)N[C@@H](Cc2cc(F)cc(F)c2)[C@H](O)[C@H]3CN(CCN3)S(=O)(=O)c4cccc(C)c4)N(C)S(=O)(=O)C	CHEMBL1097346	38			CCN(Cc1ccccc1)Cc2ccc(cc2)C3=Cc4cc(OC)c(OC)cc4OC3=O	CHEMBL244416	238			CC(C)(C)OC(=O)N1CCN(CC1)c2ccc(Br)cc2NC(=O)c3cccc4ccccc34	CHEMBL381618	1700
CN(c1cc2COC(=O)[C@](C)(N)Cc3cccc(CC[C@@H](NC(=O)c(c2)c1)c4ccccc4)c3)S(=O)(=O)C(F)(F)F	CHEMBL250918	38			CC(C)S[C@H](NC(=O)[C@@H](C[C@H](O)[C@@H]1COCc2cccc(c2)C(NC(=O)c3cc(cc(c3)C(=O)N1)N(C)S(=O)(=O)C)c4ccccc4)C(C)C)C(=O)NCc5ccccc5	CHEMBL1644463	240			CC1CCc2cccc(C[C@@](C)(N)C(=O)OCc3cc(CC1)cc(c3)N(C)S(=O)(=O)C)c2	CHEMBL394225	1700
CC(C)C[C@H](NC(=O)[C@H](CC(=O)N)NC(=O)[C@@H](NC(=O)[C@@H](N)CCC(=O)O)C(C)C)[C@@H](O)[C@@H]1CCC[C@H]1C(=O)N[C@@H](C)C(=O)O	CHEMBL191122	39			CN1C(=NC(C1=O)(c2ccncc2)c3cccc(c3)c4ccsc4)N	CHEMBL1091441	240			COc1ccc2C(=CC(=O)Oc2c1)CC(=O)Nc3cc(Br)ccc3N4CCNCC4.OC(=O)C(F)(F)F	CHEMBL205241	1700
CC(C)C[C@H](NC(=O)c1cc(cc(c1)C(=O)N[C@H](C)c2ccccc2)N(C)S(=O)(=O)C)[C@@H](O)C[C@@H](C)C(=O)N[C@@H](C(C)C)C(=O)NC(C)C	CHEMBL387771	39			COC(=O)N[C@H]1CC[C@@](CN1)(NC[C@@H](O)[C@H](Cc2cc(F)cc(F)c2)NC(=O)C)c3cccc(c3)C(C)(C)C	CHEMBL571432	240			CCOC(=O)CSc1nc2ccc(Nc3nc(nc(n3)N4CCCC4)N5CCCC5)cc2s1	CHEMBL1270883	1770
CCCC[C@H](N)[C@H](Cc1ccccc1)NC(=O)c2cc(nc(c2)N(CCC)S(=O)(=O)C)N(C)C[C@H]3C[C@@H]3C	CHEMBL248056	39			CCCOc1ccc(cc1)c2ccc(c3ccccc3Cl)n2CC(=O)\N=C(\N)/NCCCn4ccnc4	CHEMBL272719	241			CCCCCS(=O)(=O)c1cccc(c1)C(=O)N[C@@H](Cc2ccccc2)[C@H](O)CN[C@@H](C)C(=O)NC3CCCCC3	CHEMBL402305	1800
CC(C)[C@H](NC(=O)[C@@H](N)CNC(=O)C1=C(F)C(=O)NC(=O)N1)C(=O)N[C@@H](CC2CCCCC2)C(=O)N[C@@H](Cc3ccccc3)[C@@H](O)C(=O)N[C@H](C)c4ccccc4	CHEMBL1817734	39.6			CS(=O)(=O)N(c1ccccc1)c2cccc(c2)C(=O)N[C@@H](Cc3ccccc3)[C@H](O)CNC4CCCCC4	CHEMBL1210432	243			CO[C@@H](COCc1ccc(OC)cc1)C[C@H](O)[C@H](COc2cc(F)cc(F)c2)NC(=O)c3cc(nc(c3)N(C)S(=O)(=O)C)N(C)C[C@H]4C[C@@H]4C	CHEMBL583303	1800
CC(C)[C@H](NC(=O)C[C@H](O)[C@@H](COCc1cc(F)cc(F)c1)NC(=O)c2cc(cc(c2)C(=O)N[C@@H](C)c3ccccc3)N(C)S(=O)(=O)C)C(=O)Nc4cc(cc(c4)C(=O)O)C(=O)O	CHEMBL504140	40			CCc1cn2CCS(=O)(=O)N(CC(F)(F)F)c3cc(cc1c23)C(=O)N[C@H](Cc4ccccc4)[C@H](O)CNC5CCOCC5	CHEMBL537300	248			COc1ccc(cc1)C(Cc2ccc(cc2)C(F)(F)F)c3cn(C)c(N)n3	CHEMBL567718	1800
CC(C)C[C@H](NC(=O)[C@H](CC(=O)N)NC(=O)[C@@H](NC(=O)[C@@H](N)CCC(=O)O)C(C)C)[C@@H](O)[C@@H]1CCC[C@H]1C(=O)N[C@@H](C)C(=O)N[C@@H](CCC(=O)O)C(=O)O	CHEMBL363783	40			C[C@H](Cc1cc2cc(ccc2nc1N)c3ccccc3C)C(=O)NCCC(C)(C)C	CHEMBL1821820	250			COc1cccc(c1)C(=O)Nc2ccc(cc2)c3ccc(c4ccccc4)n3CC(=O)NC(=N)N	CHEMBL252190	1800
CCC#Cc1cccc(c1)[C@]2(N=C(N)N(C)C2=O)c3ccc(OC(F)F)cc3	CHEMBL1270935	40			CCOc1cc(cc(c1)C2=C(C)CCC2=O)C(=O)N[C@@H](Cc3ccccc3)[C@H](O)CNCc4cccc(c4)C(F)(F)F	CHEMBL400654	250			Cl.Clc1ccc2c(NCCCCCCCCNC(=O)CCc3ccc4nc(c5CCCOc5c4c3)c6ccccc6)c7CCCCc7nc2c1	CHEMBL552747	1810
CCc1cn(C)c2c(cc(cc12)C(=O)N[C@@H](Cc3ccccc3)[C@H](O)CNCc4cccc(c4)C(F)(F)F)N5CCCC5=O	CHEMBL508663	40			CN1C(=NC(C1=O)(c2cccc(c2)c3cccnc3)c4ccc5OCOc5c4)N	CHEMBL566415	250			C[C@@H](NC(=O)c1cc(cc(c1)c2onc(n2)[C@](C)(N)Cc3ccccc3)N(C)S(=O)(=O)C)c4ccc(F)cc4	CHEMBL1082894	1830
CCn1cc(cn1)C2(N=C(N)N(C)C2=O)c3ccc(F)c(c3)c4cncnc4	CHEMBL1824135	40			CN1C(=NC(C1=O)(c2ccncc2)c3cccc(c3)c4cccc(OC(F)(F)F)c4)N	CHEMBL1092125	250			CCCN(CCC)C(=O)c1cccc(c1)C(=O)N[C@H](COCc2ccccc2)[C@@H](O)CC(=O)N[C@@H](C(C)C)C(=O)Nc3cc(cc(c3)C(=O)O)C(=O)O	CHEMBL447880	1890
CCNc1cc(cc(c1)C(=O)N[C@@H](Cc2ccccc2)[C@H](O)CNCc3cncc(c3)C#N)N4CCCCS4(=O)=O	CHEMBL502289	40			COc1cccnc1c2ccc3nc(N)c(CC(C)C(=O)NCCC(C)(C)C)cc3c2	CHEMBL1821828	250			NC(=N)NC(=O)Cn1c(ccc1c2ccc(OCc3ccc(cc3)C#N)cc2)c4ccccc4	CHEMBL253421	1900
CCNc1cc(N2CCCCS2(=O)=O)c(F)c(c1)C(=O)N[C@@H](Cc3ccccc3)[C@H](O)CNCc4cccc(c4)C(F)(F)F	CHEMBL253641	40			CCc1cn2CCS(=O)(=O)Nc3cc(cc1c23)C(=O)N[C@H](Cc4ccccc4)[C@@H](O)CNCc5cccc(OC)c5	CHEMBL540685	260			C[C@@H](NC(=O)c1cc(cc(c1)c2cn(nn2)[C@H](CNCc3cccc(Br)c3)Cc4ccccc4)N(C)S(=O)(=O)C)c5ccccc5	CHEMBL1795872	2000
CN1C(=N[C@](C1=O)(c2ccc(OC(F)F)cc2)c3cccc(\C=C\CCCO)c3)N	CHEMBL1270832	40			CCCOc1ccc(cc1)c2ccc(c3ccccc3Cl)n2CC(=O)\N=C(\N)/NCCC4OCCO4	CHEMBL272718	269			C[C@@H](NC(=O)c1cc(cc(c1)c2noc(n2)[C@](C)(N)Cc3ccccc3)N(C)S(=O)(=O)C)c4ccc(F)cc4	CHEMBL1096681	2060
CN1C(=N[C@](C1=O)(c2ccc(OC(F)F)cc2)c3cccc(\C=C\CCF)c3)N	CHEMBL1270337	40			C[C@@]1(N)Cc2cccc(CC[C@@H](NC(=O)c3cc(Br)cc(COC1=O)c3)c4ccccc4)c2	CHEMBL251118	270			CCCCNC(=O)[C@H](C)C[C@@H](O)[C@@H]1C[C@H](C)CCCCCCCCCC(=O)N[C@@H](C)C(=O)N1	CHEMBL455207	2100
CN1C(=N[C@](C1=O)(c2ccc(OC(F)F)cc2)c3cccc(c3)C#CCCCCF)N	CHEMBL1271142	40			CC(=O)N[C@@H](Cc1cc(F)cc(F)c1)[C@H](O)CNC2(CCCOC2)c3cccc(c3)n4cccn4	CHEMBL572313	270			Oc1cc(O)cc(Oc2c(O)cc(O)c3Oc4c(Oc23)c(O)cc5oc6c(Oc7cc(O)cc(O)c7)c(O)cc(O)c6c45)c1	CHEMBL510508	2130
CN1C(=NC(C1=O)(c2ccncc2)c3cccc(c3)c4cccc(c4)C#N)N	CHEMBL1092475	40			COc1ccc(cc1OC)C2(N=C(N)N(C)C2=O)C34CC5CC(CC(C5)C3)C4	CHEMBL567485	270			C[C@@H](NC(=O)c1cc(cc(c1)c2ccsc2)C(=O)N[C@@H](Cc3ccccc3)[C@H](O)CNC4CC4)c5ccccc5	CHEMBL473652	2233
CN1C(=NC(C1=O)(c2ccncc2)c3cccc(c3)c4cccc(F)c4F)N	CHEMBL1092786	40			CS(=O)(=O)N(c1ccccc1)c2cc(cc(c2)C(=O)N[C@@H](Cc3ccccc3)[C@H](O)CNCc4cccc(c4)C(F)(F)F)C5CCCC5	CHEMBL1210434	275			CN1C(=NC(C1=O)(c2ccccc2)c3ccc(Cl)cc3)N	CHEMBL566007	2250
CN1C(=NC(C1=O)(c2ccsc2)c3cccc(c3)c4cccnc4F)N	CHEMBL1824355	40			Cc1csc(CN\C(=N/C(=O)Cn2c(ccc2C34CC5CC(CC(C5)C3)C4)c6ccccc6)\N)n1	CHEMBL404166	276			CC(C)CNC(=O)[C@H](C)C[C@H](O)[C@H](CC(C)C)NC(=O)[C@H](Cc1ccccc1)NC(=O)[C@H](CC(C)C)NC(=O)OC(C)(C)C	CHEMBL1099361	2310
CN1C(=NC(C2CCCCC2)(C1=O)c3cccc(NC(=O)c4occc4C)c3)N	CHEMBL590830	40			CC1CC1CNc2cc(cc(n2)N(C)S(=O)(=O)C)C(=O)N[C@H](CN)Cc3cc(F)cc(F)c3	CHEMBL230250	280			Cc1ccc(NC(=O)CN2C(=O)\C(=N/NC(=O)c3cc(ccc3O)[N+](=O)[O-])\c4ccccc24)cc1	CHEMBL1080295	2400
COc1ccc(cc1C(F)(F)F)C2(N=C(N)N(C)C2=O)c3cccc(c3)c4cccnc4	CHEMBL585289	40			CC(C)[C@H](NC(=O)[C@H](C)C[C@H](O)[C@H](Cc1ccccc1)NC(=O)[C@H](C)NC(=O)[C@H](CC(F)(F)C(F)F)NC(=O)OC(C)(C)C)C(=O)NCc2ccncc2	CHEMBL82607	281			COc1cccc2C=C(C(=O)Nc3cc(Br)ccc3N4CCN(CC4)C(=O)OC(C)(C)C)C(=O)Oc12	CHEMBL206854	2400
COc1ccc(cc1C)C2(N=C(N)N(C)C2=O)c3cccc(c3)c4cccnc4	CHEMBL566200	40			CCNc1cc(N2CCCCS2(=O)=O)c(F)c(c1)C(=O)N[C@@H](Cc3ccccc3)[C@H](O)CNCc4cccc(OC)c4	CHEMBL264322	283			CC(=O)N[C@@H](Cc1cc(F)cc(F)c1)[C@H](O)CNC2(CCCCC2)c3cc(ncn3)C(C)(C)C	CHEMBL1257302	2430
COc1cncc(c1)c2cccc(c2)C3(N=C(N)N(C)C3=O)c4ccsc4	CHEMBL1824358	40			N\C(=N\C(=O)Cn1c(ccc1C23CC4CC(CC(C4)C2)C3)c5ccccc5)\N[C@@H]6CC[C@@H](O)CC6	CHEMBL402576	283			C[C@H](NC(=O)c1cc(NC(=O)CC[C@@](O)(Cc2ccccc2)C(=O)N[C@H]3[C@H](O)Cc4ccccc34)cc(c1)N(C)S(=O)(=O)C)c5ccccc5	CHEMBL539397	2500
Nc1nc(Cn2c(ccc2c3ccccc3Cl)c4ccc(Oc5cncnc5)cc4)ccc1OCCO	CHEMBL1090542	40			CC(C)[C@H](NC(=O)[C@H](C)C[C@H](O)[C@@H]1CCCCCC[C@H](NC(=O)OC(C)(C)C)C(=O)N[C@@H](C)C(=O)N1)C(=O)NCc2ccccc2	CHEMBL200195	285			O[C@H]1Cc2c(O)cc(O)cc2O[C@@H]1c3cc(O)c(O)c(O)c3	CHEMBL125743	2500
CC(C)[C@H](NC(=O)[C@@H](N)CNC(=O)C1=C(F)C(=O)NC(=O)N1)C(=O)N[C@@H](CC2CCCCC2)C(=O)N[C@@H](Cc3ccccc3)[C@@H](O)C(=O)NC4(CCCCC4)c5ccccc5	CHEMBL1817777	40.6			CC(=O)N[C@@H](Cc1cc(F)cc(F)c1)[C@H](O)CNC2(CCOCC2)c3cccc(c3)C4CCOC4	CHEMBL1269841	290			Brc1ccc(N2CCN(CC2)S(=O)(=O)c3cccs3)c(NC(=O)C4=CC(=O)c5ccccc5O4)c1	CHEMBL206097	2600
CC#Cc1cc(ccc1F)[C@]2(N=C(N)N(C)C2=O)c3ccc(OC(F)F)cc3	CHEMBL1270936	41			Nc1cccc(Cn2c(ccc2c3ccccc3Cl)c4ccc(Oc5cccs5)cc4)n1	CHEMBL1092913	290			CN1C(=N)N[C@](CCC2CCCCC2)(CC3CCCCC3)C1=O	CHEMBL583178	2600
CC[C@@H](C)[C@H](NC(=O)OC(C)(C)C)C(=O)N[C@@H](C)C(=O)N[C@@H](Cc1ccccc1)[C@@H](O)C[C@@H](C)C(=O)N[C@@H](C(C)C)C(=O)NCc2ccncc2	CHEMBL1790594	42			CCCCCN1C[C@H]([C@H](Cc2ccccc2)C1=O)C(=O)N[C@@H](Cc3cc(F)cc(F)c3)[C@H](O)[C@H]4C[C@H](CN4)OCc5ccccc5	CHEMBL255400	293			CN1C(=NC(C1=O)(c2ccccc2)c3ccncc3)N	CHEMBL597233	2680
CCCN(CCC)C(=O)c1cc(cc(c1)C(=O)N[C@@H](Cc2cc(F)cc(F)c2)[C@@H](O)CNCc3cccc(OC)c3)\C(=N/OC)\C	CHEMBL555517	42			CC(C)C[C@H](NC(=O)[C@@H](C[C@@H](O)[C@H](Cc1ccccc1)NC(=O)OC(C)(C)C)Cc2ccccc2)C(=O)N[C@@H](Cc3ccccc3)C(=O)N	CHEMBL302004	300			CCNc1cc(cc(c1)C(=O)N[C@@H](Cn2cccn2)[C@H](O)CNCc3cccc(OC)c3)N4CCCCS4(=O)=O	CHEMBL399862	2690
CCNc1cc(cc(c1)C(=O)N[C@@H](Cc2ccccc2)[C@H](O)CNCc3cccc(OC)c3)N4CCCC4=O	CHEMBL252656	43			CCCN(CCC)C(=O)c1cc(C)cc(c1)C(=O)N[C@@H](Cc2cc(F)cc(F)c2)[C@H](O)[C@@H]3NCCN(Cc4ccccc4)C3=O	CHEMBL509210	300			CCCCNC(=O)[C@H](C)C[C@H](O)[C@H](Cc1ccccc1)NC(=O)[C@@H]2CCC[C@@H](C2)C3(CCCC3)NC(=O)C	CHEMBL1084153	2700
CC(=O)N[C@@H](Cc1cc(F)cc(F)c1)[C@H](O)CNC2(CCCCC2)c3cccc(c3)c4ccsc4	CHEMBL1208999	44			CSCC[C@H](NC(=O)[C@@H](NC(=O)OC(C)(C)C)C(C)C)C(=O)NC(CC(C)C)[C@@H](O)CC(=O)N[C@H](C(C)C)C(=O)NC1C[C@H](C[C@H](C1)C(=O)O)C(=O)O	CHEMBL50930	300			COc1ccc(CCNC(=O)CSc2nc3ccc(Nc4nc(nc(n4)N5CCCCC5)N6CCCCC6)cc3s2)cc1OC	CHEMBL1269608	2800
CC(C)[C@H](NC(=O)[C@H](C)C[C@H](O)[C@H](Cc1ccccc1)NC(=O)[C@H](C)NC(=O)[C@H](CC(F)F)NC(=O)OC(C)(C)C)C(=O)NCc2ccncc2	CHEMBL81490	45			O=C(Nc1cc(ccc1N2CCNCC2)c3ccccc3)c4cccc5ccccc45	CHEMBL211995	300			CCCC(=O)Nc1cccc(c1)C2(N=C(N)N(C)C2=O)C3CCCCC3	CHEMBL595302	2850
CC(C)c1cccc(CNC[C@@H](O)[C@@H]2C[C@H](C)CCCCCCCCC(=O)N(C)[C@@H](C)C(=O)N2)c1	CHEMBL564010	45			O[C@@H]([C@H](Cc1cc(F)cc(F)c1)NC(=O)[C@@H]2CN(Cc3cccs3)C(=O)C2)[C@H]4C[C@H](CN4)OCc5ccccc5	CHEMBL402754	303			CCCN(CCC)C(=O)c1cc(C)cc(c1)C(=O)N[C@@H](Cc2cc(F)cc(F)c2)[C@H](O)[C@H]3CN(CCN3)S(=O)(=O)c4cnoc4C	CHEMBL1097335	2900
CC[C@H](C)[C@H](O)C(=O)N[C@@H](CCC(F)F)C(=O)N[C@@H](Cc1ccccc1)[C@@H](O)C[C@@H](CCC(F)F)C(=O)N[C@@H](C(C)C)C(=O)NCc2ccncc2	CHEMBL432560	45			COc1cccc(CNC[C@@H](O)[C@H](Cc2cc(F)cc(F)c2)NC(=O)c3cc(cc(c3)N4CCCCS4(=O)=O)C(C)O)c1	CHEMBL541977	305			CN(c1cc2cc(c1)C(=O)NC(CO)Cc3cccc(OCCNC2=O)c3)S(=O)(=O)C	CHEMBL386666	2900
CCCN(CCC)C(=O)c1cc(cc(c1)C(=O)N[C@@H](Cc2cc(F)cc(F)c2)[C@@H](O)CNCc3cccc(OC)c3)C(C)NC(=O)C	CHEMBL539466	45			C[C@H](NC[C@@H](O)[C@H](Cc1ccccc1)NC(=O)c2cccc(c2)N(c3ccccc3C#N)S(=O)(=O)C)C(=O)NC4CCCCC4	CHEMBL1210342	310			CC(C)CC(NC(=O)C(O)c1ccccc1Br)[C@@H](O)CC(=O)N[C@H](C(C)C)C(=O)N[C@H](C)C(=O)N[C@H](CCC(=O)O)C(=O)N[C@H](Cc2ccccc2)C(=O)O	CHEMBL51304	3000
C[C@@]1(N)Cc2ccc(F)c(CC[C@@H](NC(=O)c3cc(COC1=O)cc(c3)c4cccc(F)c4C#N)c5ccc(F)cc5)c2	CHEMBL399425	46			CCCN(CCC)C(=O)c1cccc(c1)C(=O)N[C@@H](Cc2ccccc2)[C@H](O)CNCc3cccc(I)c3	CHEMBL254625	310			Cc1nc(N\C(=N/C(=O)Nc2ccccc2)\NC(=O)Nc3ccccc3)nc4ccccc14	CHEMBL1782314	3000
C[C@@]1(N)Cc2ccc(F)c(CC[C@@H](NC(=O)c3cc(COC1=O)cc(c3)c4ccccc4C#N)c5ccc(F)cc5)c2	CHEMBL251310	46			N\C(=N\C(=O)Cn1c(ccc1C23CC4CC(CC(C4)C2)C3)c5ccccc5)\NCCC#N	CHEMBL258356	310			O=C(CSc1nc2ccc(Nc3nc(nc(n3)N4CCCC4)N5CCCC5)cc2s1)NCCOc6ccccc6	CHEMBL1270985	3000
CC(=O)N[C@@H](Cc1cc(F)cc(F)c1)[C@H](O)CNC2(CCCCC2)c3cc(F)cc(c3)C(C)(C)C	CHEMBL1257531	46			O[C@@H]([C@H](Cc1cc(F)cc(F)c1)NC(=O)[C@@H]2CN(Cc3ccccn3)C(=O)C2)[C@H]4C[C@H](CN4)OCc5ccccc5	CHEMBL404839	312			COc1ccc(cc1)C2(N=C(N)N(C)C2=O)c3ccccc3	CHEMBL577905	3100
O[C@H](CCN1CCN(CC1)c2ccc(cc2NC(=O)c3cccc4ccccc34)c5ccccc5)c6ccccc6	CHEMBL208903	46			CC(=O)N[C@@H](Cc1cc(F)cc(F)c1)[C@H](O)CNC2(CCCCC2)c3cc(N)cc(c3)C(C)(C)C	CHEMBL1257892	318			CC[C@H](C)[C@H](O)C(=O)N[C@@H](CC(F)F)C(=O)N[C@@H](Cc1ccccc1)[C@@H](O)C[C@@H](CC(F)F)C(=O)N[C@@H](C(C)C)C(=O)NCc2ccncc2	CHEMBL85379	3180
CC(=O)N[C@@H](Cc1cc(F)cc(F)c1)[C@H](O)CNC2(CCC(=O)NC2)c3cccc(c3)C(C)(C)C	CHEMBL566810	47			CC(C)c1cc(cs1)C2(CCCCC2)NC[C@@H](O)[C@H](Cc3cc(F)cc(F)c3)NC(=O)C	CHEMBL1258352	320			COC1=CC2CCC(Cc3cc(ccc3OC)[N+](=O)[O-])(C2C=C1)c4cn(C)c(N)n4	CHEMBL568557	3200
COCc1cc2cc(OCCCCOc3cccc(C[C@H](NC2=O)[C@H](O)CNC4(CC4)c5cccc(c5)C(C)C)c3)n1	CHEMBL595267	47			CN1C(=NC(C1=O)(c2ccc(OC(F)(F)F)cc2)c3cc(F)cc(c3)c4cncnc4)N	CHEMBL566633	320			CC(=CCC1=C(Oc2c(CC=C(C)C)c(O)cc(O)c2C1=O)c3ccc(O)cc3O)C	CHEMBL518543	3400
CC(=O)N[C@@H](Cc1cc(F)cc(F)c1)[C@H](O)CNC2(CCC(=C)NC2)c3cccc(c3)C(C)(C)C	CHEMBL584547	48			CCCOc1ccc(cc1)c2ccc(c3ccccc3Cl)n2CC(=O)\N=C(\N)/NCCCSC	CHEMBL403107	321			OC1CC(Nc2cccc(c2)c3cn(nn3)[C@H](CNCc4cccc(Br)c4)Cc5ccccc5)C(O)CC1Nc6cccc(c6)C#C	CHEMBL1795873	3400
CCCN(CCC)C(=O)c1cc(C)cc(c1)C(=O)N[C@@H](Cc2cc(F)cc(F)c2)[C@H](O)[C@H]3CN(CCN3)S(=O)(=O)c4cccc(C)c4	CHEMBL1097321	48			CC(C)Nc1cc(cc(c1)C(=O)N[C@@H](Cc2ccccc2)[C@H](O)CN[C@@H](C)C(=O)NC3CCCCC3)N4CCCC4=O	CHEMBL227053	330			NC(=N)NC(=O)Cn1c(ccc1c2cc(Cl)ccc2Cl)c3ccccc3	CHEMBL399837	3500
CCn1cc2CCS(=O)(=O)N(C)c3cc(cc1c23)C(=O)N[C@@H](Cc4ccccc4)C(=O)CNC5CCOCC5	CHEMBL558471	48			CCNc1cc(cc(c1)C(=O)N[C@@H](Cc2ccccc2)[C@H](O)CNCc3cccc(OC)n3)N4CCCC4=O	CHEMBL254138	330			OC(=O)C(F)(F)F.Brc1ccc(N2CCNCC2)c(NC(=O)c3ccc4ccccc4n3)c1	CHEMBL377745	3500
C[C@H]1CC[C@@](CN1)(NC[C@@H](O)[C@H](Cc2cc(F)cc(F)c2)NC(=O)C)c3cccc(c3)C(C)(C)C	CHEMBL584731	49			CCc1cn2CCCS(=O)(=O)Nc3cc(cc1c23)C(=O)N[C@@H](Cc4ccccc4)[C@H](O)CNc5ccc(OC)cc5	CHEMBL553938	339			COc1cccc(CNC[C@@H](O)[C@H](Cc2ccccc2)NC(=O)CCS(=O)(=O)C3CCCCC3)c1	CHEMBL398925	3670
CC(C)[C@H](NC(=O)[C@@H](N)CCC(=O)O)C(=O)N[C@@H](CC(=O)N)C(=O)N[C@@H](CC1CCCCC1)[C@@H](O)C[C@H](C(=O)N[C@H](C)C(=O)N[C@H](CCC(=O)O)C(=O)N[C@H](Cc2ccccc2)C(=O)O)C(C)(C)O	CHEMBL311262	49			CC(=O)N[C@@H](Cc1cc(F)cc(F)c1)[C@H](O)CNC2(CCCCC2)c3cccc(c3)N4C5CCC(C5)C4=O	CHEMBL1209221	340			[Cl-].COc1ccc(NC(=O)c2cccc(NC(=O)C[n+]3ccccc3)c2)cc1	CHEMBL1164437	3700
CC(C)S(=O)(=O)N(C)c1cc(cc(NC[C@H]2C[C@@H]2C)n1)C(=O)N[C@@H](Cc3ccccc3)[C@@H](N)CF	CHEMBL230245	49			C(CN1CCCCC1)C2CCc3cc(OCc4ccc(cc4)c5ccccc5)ccc3C2	CHEMBL142715	350			CC(C)CNC(=O)[C@@H](C[C@H](O)[C@@H]1COCc2cccc(c2)C(NC(=O)c3cc(cc(c3)C(=O)N1)N(C)S(=O)(=O)C)c4ccccc4)C(C)C	CHEMBL1644464	3700
CN(c1cc2COC[C@](C)(N)Cc3cccc(CC[C@@H](NC(=O)c(c2)c1)c4ccccc4)c3)S(=O)(=O)C	CHEMBL250120	49			CC(=O)N[C@@H](Cc1cc(F)cc(F)c1)[C@H](O)CN[C@]2(CC[C@H](NC(=O)C)NC2)c3cccc(c3)C(C)(C)C	CHEMBL583688	350			CN(c1cc2COC(=O)[C@](C)(N)Cc3cccc(CC[C@@H](NC(c(c2)c1)C(F)(F)F)c4ccccc4)c3)S(=O)(=O)C	CHEMBL392564	3700
CC(C)S[C@H](NC(=O)[C@@H](C[C@H](O)[C@@H]1COCc2cccc(c2)C(C)NC(=O)c3cc(cc(c3)C(=O)N1)N(C)S(=O)(=O)C)C(C)C)C(=O)NCc4ccccc4	CHEMBL1644462	50			CC(=O)N[C@@H](Cc1cc(F)cc(F)c1)[C@H](O)CNC2(CC2)c3cnn(CC(C)(C)C)c3	CHEMBL1258002	350			CC(C)CNC(=O)[C@H](C)C[C@H](O)[C@H](CC(C)C)NC(=O)[C@H](Cc1ccc(cc1)[N+](=O)[O-])NC(=O)\C=C\c2ccc(cc2)C(F)(F)F	CHEMBL1099021	3790
CCCCOc1cc(ccc1OC)C2(N=C(N)N(C)C2=O)c3cccc(c3)c4cccnc4	CHEMBL567061	50			CCCN(CC1CC1)c2cc(cc(n2)N(C)S(=O)(=O)C(C)C)C(=O)N[C@H](CO)Cc3cc(F)cc(F)c3	CHEMBL394850	350			O=C(CCCCC1SCCS1)N2CCN(CC2)c3ccc(cc3NC(=O)c4cccc5ccccc45)c6ccccc6	CHEMBL211097	3800
CCCOc1cc(ccc1OC)C2(N=C(N)N(C)C2=O)c3cccc(c3)c4cccnc4	CHEMBL566407	50			COc1cc2O[C@@H](CC(=O)c2c(O)c1C)c3ccc(OC)c(c3)c4c(O)cc(O)c5C(=O)C=C(Oc45)c6ccc(O)cc6	CHEMBL1208905	350			COc1ccc(cc1OC)C(=O)N[C@@H](Cc2ccc(cc2)[N+](=O)[O-])C(=O)N[C@@H](CC(C)C)[C@@H](O)C[C@@H](C)C(=O)NCC(C)C	CHEMBL1099023	3810
CCOc1cc(cc(c1)C(=O)N[C@@H](Cc2ccccc2)[C@H](O)CNCc3cccc(c3)C(F)(F)F)N(c4ccccc4)S(=O)(=O)C	CHEMBL1210360	50			CSCC[C@H](NC(=O)[C@@H](O)C(C)C)C(=O)N[C@@H](Cc1ccccc1)[C@@H](O)C[C@@H](C)C(=O)N[C@@H](C(C)C)C(=O)NCc2ccncc2	CHEMBL82352	350			CC(C)C[C@H](NC(=O)[C@@H]1CC(=O)NCCCCCOC(=O)N[C@@H](C(C)C)C(=O)N1)[C@@H](O)C[C@@H](C)C(=O)N[C@@H](C(C)C)C(=O)NCc2ccccc2	CHEMBL361977	3900
CCOc1cc(cc(c1)C(=O)N[C@@H](Cc2ccccc2)[C@H](O)CNCc3cccc(c3)C(F)(F)F)N4CCCS4(=O)=O	CHEMBL264110	50			CCc1cn2CCS(=O)(=O)Oc3cc(cc1c23)C(=O)N[C@@H](Cc4ccccc4)[C@@H](O)CNCC#C	CHEMBL558078	360			CC(=O)N[C@@H](Cc1cc(F)cc(F)c1)[C@H](O)CNC2(CC2)c3cccc(c3)C4COCCO4	CHEMBL1209418	4000
CCOc1cc(ccc1OC)C2(N=C(N)N(C)C2=O)c3cccc(c3)c4cccnc4	CHEMBL566406	50			CCCN(CCC)C(=O)c1cc(CC#N)cc(c1)C(=O)N[C@@H](Cc2ccccc2)[C@H](O)CNCc3cccc(OC)c3	CHEMBL230190	360			COC(=O)c1ccc(NC(=O)[C@@H](NC(=O)CCC(O)(Cc2ccccc2)C(=O)Nc3cc(cc(c3)C(=O)N[C@@H](C)c4ccc(F)cc4)N(C)S(=O)(=O)C)C(C)C)cc1	CHEMBL556529	4000
CN1C(=N[C@](C1=O)(c2ccc(OC(F)F)cc2)c3cccc(\C=C\CCO)c3)N	CHEMBL1270730	50			CCNc1cc(N2CCCCS2(=O)=O)c(F)c(c1)C(=O)N[C@@H](Cc3ccccc3)[C@H](O)CNCc4cnn(CC)c4	CHEMBL254485	361			COc1cccc(CNC[C@@H](O)[C@H](Cc2ccccc2)NC(=O)CCCS(=O)(=O)c3ccccc3)c1	CHEMBL252547	4131
CN1C(=N[C@](C1=O)(c2ccc(OC(F)F)cc2)c3cccc(CCCC#N)c3)N	CHEMBL1270238	50			CC(=O)N[C@@H](Cc1cc(F)cc(F)c1)[C@H](O)CNC2(CCCCC2)c3cccc(c3)c4cccs4	CHEMBL1209054	370			Nc1ncccc1NCc2cc(ccc2OCc3ccccn3)c4ccc5cc[nH]c5c4	CHEMBL220428	4200
CN1C(=NC(C1=O)(c2cccc(c2)c3cccnc3F)c4cnn(CCF)c4)N	CHEMBL1824337	50			C\C=C(/C)\c1cccc(c1)C2(CCCCC2)NC[C@@H](O)[C@H](Cc3cc(F)cc(F)c3)NC(=O)C	CHEMBL1208871	380			O[C@H]1[C@H](Cc2ccc(O)c(Br)c2)CS(=O)(=O)C[C@@H]1NCc3cc(Cl)cc(Cl)c3	CHEMBL1760867	4200
CN1C(=NC(C1=O)(c2ccncc2)c3cccc(c3)c4cc(F)ccc4F)N	CHEMBL1092787	50			CC(=O)N[C@@H](Cc1cc(F)cc(F)c1)[C@H](O)CN[C@]2(CC[C@@H](NC2)C#N)c3cccc(c3)C(C)(C)C	CHEMBL572290	380			CC(C)CNC(=O)[C@H](C)C[C@H](O)[C@H](CC(C)C)NC(=O)[C@H](Cc1ccc(cc1)[N+](=O)[O-])NC(=O)c2ccc(Cl)cc2Cl	CHEMBL1099025	4240
CN1C(=NC(C1=O)(c2ccncc2)c3cccc(c3)c4cccc(F)c4)N	CHEMBL1092476	50			CC(=O)N[C@@H](Cc1cc(F)cc(F)c1)[C@H](O)CNC2(CCN(CC2)C(=O)N)c3cccc(c3)C(C)(C)C	CHEMBL584936	380			CC(C)c1ccnc(CN[C@H]2CS(=O)(=O)C[C@@H](Cc3ccc(O)c(Br)c3)[C@@H]2O)c1	CHEMBL1760864	4300
COc1ccc(cc1F)C2(N=C(N)N(C)C2=O)c3cccc(c3)c4cccnc4	CHEMBL566223	50			CCOc1cc(cc(c1)C(=O)N[C@@H](Cc2ccccc2)[C@H](O)CNCc3cccc(c3)C(F)(F)F)N4CCCC4=O	CHEMBL398418	380			CC(=O)N[C@@H](Cc1cc(F)cc(F)c1)[C@H](O)CNC2(CCCCC2)c3cc(cs3)C#C	CHEMBL1258575	4316
COCc1cc2NCCCCOc3cccc(C[C@H](NC(=O)c(c1)c2)[C@H](O)CNC(C)(C)c4cccc(c4)C(C)C)c3	CHEMBL595185	50			CN1C(=NC(C2CCCCC2)(C1=O)c3cccc(NC(=O)c4ccc5OCOc5c4)c3)N	CHEMBL605518	380			CC(=O)N[C@@H](Cc1cc(F)cc(F)c1)[C@H](O)[C@H]2CN(CCN2)S(=O)(=O)c3cccc(C)c3	CHEMBL1087742	4350
COCc1cc2NCCCCOc3cccc(C[C@H](NC(=O)c(c1)c2)[C@H](O)CNC4(CCCC4)c5cccc(c5)C(C)(C)C)c3	CHEMBL595303	50			NC1=NC(C2CCCCC2)(C(=O)N1C[C@@H]3CC[C@H](CC3)C(=O)O)c4ccccc4	CHEMBL589891	390			CC(C)C[C@H](NC(=O)[C@@H](NC(=O)[C@@H](N)CNC(=O)c1nn[nH]n1)C(C)C)C(=O)O	CHEMBL1645528	4400
COCCC\C=C\c1cccc(c1)[C@]2(N=C(N)N(C)C2=O)c3ccc(OC(F)F)cc3	CHEMBL1270729	50			CCCN(CCC)C(=O)c1cc(cc(c1)S(=O)(=O)c2ccc(OC)cc2)C(=O)N[C@@H](Cc3cc(F)cc(F)c3)[C@@H](O)CNCc4cccc(OC)c4	CHEMBL558542	392			Br.CS(=O)(=O)N(c1cccc(c1)C(=O)N[C@@H](Cc2ccccc2)[C@H](O)CNCc3cccc(c3)C(F)(F)F)c4ccccn4	CHEMBL1788375	4570
O[C@@H]([C@H](Cc1ccccc1)NC(=O)C2=CC(=O)C=C(O2)C(=O)N3COC[C@@H]3c4ccccc4)C(=O)Nc5cccc(c5)c6nn[nH]n6	CHEMBL400043	50			C(CCCNc1c2Cc3ccccc3c2nc4ccccc14)CCCNc5c6Cc7ccccc7c6nc8ccccc58	CHEMBL1819180	400			C[C@@H](NC(=O)c1cc(cc(c1)c2n[nH]c(n2)[C@](C)(N)Cc3ccccc3)N(C)S(=O)(=O)C)c4ccc(F)cc4	CHEMBL1092147	4740
CCn1cc2CCS(=O)(=O)N(C)c3cc(cc1c23)C(=O)N[C@@H](Cc4ccccc4)[C@@H](O)CNCC(F)F	CHEMBL540757	51			CC(=O)N[C@@H](Cc1cc(F)cc(F)c1)[C@H](O)CN[C@]2(CC[C@H](NS(=O)(=O)C)NC2)c3cccc(c3)C(C)(C)C	CHEMBL583546	400			CC(C)[C@H](NC(=O)[C@H](C)C[C@H](O)[C@@H]1CCCCCC[C@H](NC(=O)OC(C)(C)C)C(=O)N[C@@H](C)C(=O)N1)C(=O)NCc2ccncc2	CHEMBL370185	4925
CCCC(CCC)S(=O)(=O)C[C@@H](NC(=O)c1ccc(cc1)C(F)(F)F)C(=O)N[C@@H](Cc2cc(F)cc(F)c2)[C@H](O)CNCc3cccc(CC)c3	CHEMBL234555	53			CC(=O)N[C@@H](Cc1cc(F)cc(F)c1)[C@H](O)CNC2(CCCN(O)C2)c3cccc(c3)C(C)(C)C	CHEMBL572082	400			CSCC[C@H](NC(=O)[C@@H](NC(=O)C)C(C)C)C(=O)N[C@@H](CC1CCCCC1)C(O)CC(=O)N[C@@H](C(C)C)C(=O)N[C@@H](C)C(=O)N[C@@H](CCC(=O)O)C(=O)N[C@@H](Cc2ccccc2)C(=O)O	CHEMBL89118	5000
CCCN(c1cc2COC[C@](C)(N)Cc3cccc(CC[C@@H](NC(=O)c(c2)c1)C#C)c3)S(=O)(=O)C	CHEMBL248876	53			CCCN(CCC)C(=O)c1cc(C)cc(c1)C(=O)N[C@@H](Cc2cc(F)cc(F)c2)[C@H](O)[C@H]3CN(CCN3)S(=O)(=O)c4ccncc4	CHEMBL1097334	400			CSCC[C@H](NC(=O)[C@@H](NC(=O)C)C(C)C)C(=O)NC(CC(C)C)C(O)CC(=O)N[C@@H](C)C(=O)N[C@@H](C)C(=O)N[C@@H](CCC(=O)O)C(=O)N[C@@H](Cc1ccccc1)C(=O)O	CHEMBL90615	5000
CCCN(CCC)C(=O)c1cc(CCO)cc(c1)C(=O)N[C@@H](Cc2cc(F)cc(F)c2)[C@@H](O)CNCc3cccc(OC)c3	CHEMBL539465	53			CN(c1cc2COC(=O)[C@](C)(N)Cc3cccc(CCCCNc(c2)n1)c3)S(=O)(=O)C	CHEMBL392361	400			CSCC[C@H](NC(=O)[C@@H](NC(=O)OC(C)(C)C)C(C)C)C(=O)NC(CC(C)C)[C@@H](O)CC(=O)N[C@H](C(C)C)C(=O)NCc1cccc(OCC(=O)O)c1	CHEMBL51188	5000
CCNc1cc(cc(c1)C(=O)N[C@@H](Cc2ccccc2)[C@H](O)CN[C@@H](C)C(=O)NC3CCCCC3)N(c4ccccc4)S(=O)(=O)C	CHEMBL1210359	53			CCOC[C@H](N)[C@H](Cc1ccccc1)NC(=O)c2cc(nc(c2)N(C)S(=O)(=O)C(C)C)N(C)C[C@H]3C[C@@H]3C	CHEMBL248245	402			O[C@@H](CN(CCc1ccccc1)S(=O)(=O)c2ccccc2)CN3CCN(CC3)C(c4ccccc4)c5ccccc5	CHEMBL1278097	5100
COC[C@H]1CCCN1C(=O)c2cc(C)cc(c2)C(=O)N[C@@H](Cc3cc(F)cc(F)c3)[C@H](O)[C@H]4CN(CCN4)S(=O)(=O)c5cn(C)cn5	CHEMBL1097352	53			Nc1cccc(Cn2c(ccc2c3ccccc3Cl)c4ccc(Oc5cccnc5)cc4)n1	CHEMBL1091220	410			Nc1cccc(Cn2c(ccc2c3ccccc3)c4ccccc4)n1	CHEMBL1092879	5200
C[C@H](N)[C@H](Cc1ccsc1)NC(=O)c2cc(NCC3CC3C)nc(c2)N(C)S(=O)(=O)C	CHEMBL247596	54			Nc1cccc(Cn2c(ccc2c3ccccc3Cl)c4ccc(Oc5cccnn5)cc4)n1	CHEMBL1092912	410			C[C@H](NC[C@@H](O)[C@H](Cc1ccccc1)NC(=O)c2cccc(c2)N3CCCC3=O)C(=O)NC4CCCCC4	CHEMBL271230	5300
CCCN(CCC)C(=O)c1cc(Oc2ccccc2OC)cc(c1)C(=O)N[C@@H](Cc3cc(F)cc(F)c3)[C@@H](O)CNCc4cccc(OC)c4	CHEMBL557278	54			CC(C)C[C@H](NC(=O)[C@@H](NC(=O)[C@@H](N)CCC(=O)O)C(C)C)C(=O)N[C@@H](Cc1ccccc1)[C@@H](O)C(=O)N[C@@H](CC(=O)O)C(=O)N[C@@H](C)C(=O)N[C@@H](CCC(=O)O)C(=O)N[C@@H](Cc2ccccc2)C(=O)O	CHEMBL406146	413			Oc1cc(O)c2Oc3c(Oc2c1)c(O)cc4Oc5c(O)cc(O)cc5Oc34	CHEMBL559870	5350
CC(C)C[C@H](NC(=O)[C@@H](NC(=O)[C@@H](N)CCC(=O)O)C(C)C)C(=O)N[C@@H](Cc1ccccc1)[C@@H](O)C(=O)Nc2cc(cc(c2)C(=O)O)C(=O)O	CHEMBL288919	55			CCN1C(=O)Nc2c1cc(cc2N3CCCC3=O)C(=O)N[C@@H](Cc4ccccc4)[C@H](O)CNCc5cccc(OC)c5	CHEMBL448939	420			C[C@H](NC[C@@H](O)[C@H](Cc1ccccc1)NC(=O)c2cccc(NS(=O)(=O)Cc3ccccc3)c2)C(=O)NC4CCCCC4	CHEMBL1210335	5500
CC(C)c1cccc(CNC[C@@H](O)[C@@H]2Cc3cccc(OCCCCOc4cc(cc(C)n4)C(=O)N2)c3)c1	CHEMBL589369	55			CC(C)C[C@H](NC(=O)[C@@H](NC(=O)[C@@H](N)CNC(=O)c1nn[nH]n1)C(C)C)C(=O)NCC(O)(Cc2ccccc2)C(=O)Nc3cccc(c3)C(=O)O	CHEMBL1645504	430			CN(c1cc(cc(c1)C(=O)N[C@@H](Cc2ccccc2)[C@H](O)CNC3CC3)C(O)Cc4ccccc4)S(=O)(=O)C	CHEMBL202015	5500
CCNc1cc(cc2N(C)S(=O)(=O)CCCc12)C(=O)N[C@@H](Cc3ccccc3)[C@H](O)CNCc4cccc(c4)C(F)(F)F	CHEMBL553699	56			CC(Cc1cc2cc(ccc2nc1N)c3ccccc3C)C(=O)NCc4cncs4	CHEMBL1821823	430			CN(C)c1cccc(CNC[C@@H](O)[C@H](Cc2ccccc2)NC(=O)[C@@H]3CN(Cc4cc(F)c(F)cc4F)C(=O)N3)c1	CHEMBL410865	5590
CCCN(CCC)C(=O)c1cc(C)cc(c1)C(=O)N[C@@H](Cc2cc(F)cc(F)c2)[C@H](O)[C@H]3CN(CCN3)S(=O)(=O)c4cnc(C)n4C	CHEMBL1097331	57			CC(=O)N[C@@H](Cc1cc(F)cc(F)c1)[C@H](O)CNC2(CC2)c3cn(CC(C)(C)C)nn3	CHEMBL1258121	450			CC(C)C[C@H](NC(=O)c1cc(cc(c1)C(=O)NCc2ccccc2)N(C)S(=O)(=O)C)[C@@H](O)C[C@@H](C)C(=O)N[C@@H](C(C)C)C(=O)NC(C)C	CHEMBL227758	5600
COC[C@H]1CCCN1C(=O)c2cc(OC)cc(c2)C(=O)N[C@@H](Cc3cc(F)cc(F)c3)[C@H](O)[C@@H]4NCCN(Cc5ccccc5)C4=O	CHEMBL453413	57			CC(=O)N[C@@H](Cc1cc(F)cc(F)c1)[C@H](O)CNC2(CCCCC2)c3cccc(I)c3	CHEMBL1209892	460			NC(=N)NC(=O)Cn1c(ccc1c2ccc(NC(=O)c3cccc(Br)c3)cc2)c4ccccc4	CHEMBL252189	5600
CCc1cn2CCS(=O)(=O)N(C)c3cc(cc1c23)C(=O)N[C@@H](Cc4ccccc4)[C@H](O)CNC.OC=O	CHEMBL493984	57.3			Nc1cccc(Cn2c(ccc2c3ccccc3Cl)c4ccc(Oc5cnccn5)cc4)n1	CHEMBL1092000	460			COc1ccc(cc1)C(Cc2cc(ccc2OC)[N+](=O)[O-])c3c[nH]c(N)n3	CHEMBL494015	5700
CN(C)c1ccc(NC(=O)Nc2cc(cc(c2)C(F)(F)F)C(F)(F)F)cc1C(=O)NCCCN3CCOCC3	CHEMBL370043	57.8			CC(=O)N[C@@H](Cc1cc(F)cc(F)c1)[C@H](O)CNC2(CC2)c3cc(CC(C)(C)C)cs3	CHEMBL1230648	470			CCNc1cc(cc(c1)C(=O)N[C@@H](C(C)C)[C@H](O)CNCc2cccc(OC)c2)N3CCCCS3(=O)=O	CHEMBL254273	5750
CC(=O)N[C@@H](Cc1cc(F)cc(F)c1)[C@H](O)CNC2(CCCCC2)c3cccc(c3)n4cccn4	CHEMBL572081	59			CN1C(=NC(C1=O)(c2cccc(c2)c3cncnc3)c4cc(C)sc4Cl)N	CHEMBL1824352	470			C[C@@H](NC(=O)c1cc(cc(c1)C(=O)N[C@H](CN)Cc2ccccc2)N(C)S(=O)(=O)C)c3ccc(F)cc3	CHEMBL211937	5900
CCC[C@H](NC(=O)OC(C)(C)C)C(=O)N[C@@H](CCSC)C(=O)N[C@@H](Cc1ccccc1)[C@@H](O)C[C@@H](C)C(=O)N[C@@H](C(C)C)C(=O)NCc2ccncc2	CHEMBL81037	60			CCCCN(CCCC)S(=O)(=O)CCC(=O)N[C@@H](Cc1ccccc1)[C@H](O)CNCc2cccc(OC)c2	CHEMBL253165	484			O[C@@H](CN(Cc1ccccc1)S(=O)(=O)c2ccc(Cl)cc2)CN3CCN(CC3)C(c4ccccc4)c5ccccc5	CHEMBL1277921	6300
CCc1cn2CS(=O)(=O)N(C)c3cc(cc1c23)C(=O)N[C@@H](Cc4ccccc4)[C@H](O)CNC5CCCCC5	CHEMBL537797	60			C[C@H](Cc1cc2cc(ccc2nc1N)c3ccccc3C)C(=O)NCc4cnccn4	CHEMBL1821824	490			COc1cccc(CNC[C@@H](O)[C@H](Cc2ccccc2)NC(=O)CCCS(=O)(=O)N3CCCCC3)c1	CHEMBL252756	6461
CN1C(=N[C@](C1=O)(c2ccc(OC(F)(F)F)cc2)c3cccc(c3)c4cccnc4F)N	CHEMBL1271140	60			CCc1cn2CCCS(=O)(=O)Nc3cc(cc1c23)C(=O)N[C@@H](Cc4ccccc4)[C@H](O)CNC5CC5	CHEMBL561217	490			CCCN(CCC)C(=O)c1cccc(c1)C(=O)N[C@@H](Cc2cc(F)cc(F)c2)[C@@H](O)C[C@@H](CC)C(=O)N[C@H]3C[C@H](C[C@H](C3)OC)OC	CHEMBL295109	6600
CN1C(=N[C@](C1=O)(c2ccc(OC(F)F)cc2)c3cccc(CCCC(F)(F)F)c3)N	CHEMBL1270134	60			CC(=O)N[C@@H](Cc1cc(F)cc(F)c1)[C@H](O)CN[C@]2(CC[C@H](Nc3cccnc3)NC2)c4cccc(c4)C(C)(C)C	CHEMBL565550	500			CC(C)CC1(C)NC(=N)N(Cc2ccc(CNC(=O)Nc3ccc(cc3)C#N)cc2)C1=O	CHEMBL584963	7000
CN1C(=NC(C1=O)(c2ccncc2)c3cccc(c3)c4cc(F)cc(F)c4)N	CHEMBL1091463	60			CCCN(CCC)C(=O)c1cccc(c1)C(=O)N[C@@H](Cc2cc(F)cc(F)c2)[C@H](O)CN[C@H](C)C(=O)NCC(C)C	CHEMBL220813	500			CC[C@@H](CC(=O)NCC1CCCCC1)n2c(N)nc3cc(Cl)ccc23	CHEMBL1222240	7000
CN1C(=NC(C1=O)(c2ccncc2)c3cccc(c3)c4cccnc4)N	CHEMBL604590	60			CCCCNC(=O)[C@H](C)C[C@H](O)[C@@H]1COC\C=C\CSC[C@H](NC(=O)OC(C)(C)C)C(=O)N[C@@H](C)C(=O)N1	CHEMBL377548	510			CN(c1cc2COC(=O)[C@](C)(N)Cc3cccc(CCC(CCc(c2)n1)c4ccccc4)c3)S(=O)(=O)C	CHEMBL235854	7000
CN1C(=NC(C1=O)(c2ccsc2)c3cccc(c3)c4cccnc4)N	CHEMBL1824354	60			CCNc1cc(N2CCCC2=O)c(F)c(c1)C(=O)N[C@@H](Cc3ccccc3)[C@H](O)CNCc4cccc(c4)C(F)(F)F	CHEMBL445734	519			OC(=O)c1cc(ccc1Cl)c2oc(\C=N\Nc3nc(Nc4ccc(F)cc4)nc(n3)N5CCOCC5)cc2	CHEMBL1164540	7100
CNC(=O)Oc1ccc(C[C@@H]2CS(=O)(=O)C[C@H](NCc3cccc(c3)C(C)C)[C@H]2O)cc1Br	CHEMBL1760860	60			COc1ncccc1c2cccc(c2)C3(N=C(N)N(C)C3=O)c4ccc(OC(F)(F)F)cc4	CHEMBL567259	520			C(CCCNc1c2CCCCc2nc3ccccc13)CCCNc4c5CCCCc5nc6ccccc46	CHEMBL32823	7500
CO\N=C(/C)\c1cc(cc(c1)C(=O)N[C@@H](Cc2cc(F)cc(F)c2)[C@H](O)CNCc3cccc(OC)c3)N(C)S(=O)(=O)C	CHEMBL553612	60			COc1cccc(CNC[C@H](O)[C@H](Cc2cc(F)cc(F)c2)NC(=O)c3cc(cc(c3)\C(=N/OCC=C)\C)C(=O)NC(C)c4ccc(F)cc4)c1	CHEMBL555518	530			CN1C(=NC(C)(CC1=O)c2ccc(Cl)c(Cl)c2)N	CHEMBL239425	7500
COCc1cc2NCCCCOc3cccc(C[C@H](NC(=O)c(c1)c2)[C@H](O)CNCc4cccc(c4)C(C)C)c3	CHEMBL591546	60			CCCN(CCC)C(=O)c1cc(cc(c1)\C(=N/OCc2ccccc2)\C)C(=O)N[C@@H](Cc3cc(F)cc(F)c3)[C@@H](O)CNCc4cccc(OC)c4	CHEMBL539972	534			CC(=O)N[C@@H](Cc1cc(F)cc(F)c1)[C@H](O)CNC2(CCCCC2)c3cccc(c3)n4nccn4	CHEMBL1209057	7700
CSCC[C@H](NC(=O)[C@H](CC(C)C)NC(=O)C)C(=O)N[C@@H](CC(C)C)[C@@H](O)[C@@H]1CCC[C@H]1C(=O)N[C@@H](C)C(=O)O	CHEMBL190010	60			N\C(=N\C(=O)Cn1c(ccc1C23CC4CC(CC(C4)C2)C3)c5ccccc5)\NCC(O)CO	CHEMBL401832	536			CC(C)CNC(=O)[C@H](C)C[C@H](O)[C@H](CC(C)C)NC(=O)[C@H](Cc1ccccc1)NC(=O)c2ccc3OCOc3c2	CHEMBL1088138	8070
CC(=O)N[C@@H](Cc1cc(F)cc(F)c1)[C@H](O)CNC2(CCOCC2)c3cccc(c3)C(C)(C)C	CHEMBL570556	61			CCCCCOc1ccc(cc1)c2ccc(c3ccccc3Cl)n2Cc4cccc(N)n4	CHEMBL1093450	550			NC(=NC(=O)Cc1c(csc1c2ccccc2)c3ccccc3)N	CHEMBL236850	8300
CCNc1cc(cc(c1)C(=O)N[C@@H](Cc2cc(F)cc(F)c2)[C@H](O)[C@H]3CN(CCN3)S(=O)(=O)c4cccc(C)c4)N5CCCCS5(=O)=O	CHEMBL1097345	62			CCCN(CCC)C(=O)c1cc(C)cc(c1)C(=O)N[C@@H](Cc2cc(F)cc(F)c2)[C@H](O)[C@@H]3NCCN(Cc4ccccc4OC)C3=O	CHEMBL445721	550			Oc1cc(O)c(Oc2cc(O)c3Oc4c(Oc5cc(O)cc(O)c5)c(O)cc(O)c4Oc3c2)c(O)c1	CHEMBL456228	8590
C[C@@H](NC(=O)c1cc(cc2OCCCc12)C(=O)N[C@@H](Cc3ccccc3)[C@H](O)CNC4CC4)c5ccccc5	CHEMBL473854	63			CCN1CCN2CCS(=O)(=O)N(C)C3C=C(C=C1C23)C(=O)N[C@@H](Cc4ccccc4)[C@H](O)CNC5CC5	CHEMBL561095	550			CC(C)OC(=O)CN1C(=C(C(C)C(=C1C)C(=O)N[C@@H](Cc2ccccc2)[C@H](O)CNC3CC3)C(=O)NOCc4ccccc4)C	CHEMBL1165427	9000
CCNc1cc(cc(N2CCCC2=O)c1C)C(=O)N[C@@H](Cc3ccccc3)[C@H](O)CNCc4cccc(c4)C(F)(F)F	CHEMBL453841	63			CCCOc1ccc(cc1)c2ccc(c3ccccc3Cl)n2CC(=O)\N=C(\N)/NCc4occc4	CHEMBL404341	558			COc1ccc(cc1)c2cc(O)cc(c2O)c3ccccc3	CHEMBL1762684	9100
COC1=C(F)C2CCC(Cc3ccc(cc3)C(F)(F)F)(C2C=C1)c4cn(C)c(N)n4	CHEMBL582982	63			N\C(=N\C(=O)Cn1c(ccc1C23CC4CC(CC(C4)C2)C3)c5ccccc5)\NCCc6cccs6	CHEMBL272765	559			Nc1ncccc1NCc2cccc(c2)c3ccc4cc[nH]c4c3	CHEMBL220896	9100
CC[C@H](C)NC[C@H](O)[C@H](Cc1ccccc1)NC(=O)c2cc3N(C)S(=O)(=O)CCc4cn(CC)c(c2)c34	CHEMBL556453	64			CC(=O)N[C@@H](Cc1cc(F)cc(F)c1)[C@H](O)CNC2(CCCCC2)c3cccc(c3)C4CCOCOC4	CHEMBL1209286	560			O=C1C=C(C(=O)c2ccccc12)c3ccccc3	CHEMBL1762552	9330
CCCN(CCC)C(=O)c1cc(C)cc(c1)C(=O)N[C@@H](Cc2cc(F)cc(F)c2)[C@H](O)[C@H]3CN(CCN3)S(=O)(=O)c4ccccc4C	CHEMBL1097320	64			CC(Cc1cc2cc(ccc2nc1N)c3ccccc3C)C(=O)NCc4cccnc4	CHEMBL1821822	560			CC(=O)N[C@@H](Cc1cc(F)cc(F)c1)[C@H](O)CNC2(CC2)c3nc(CC(C)(C)C)cs3	CHEMBL1257893	9360
C[C@@H](NC(=O)c1cc(cc(c1)c2oc(nn2)[C@](C)(N)Cc3ccccc3)N(C)S(=O)(=O)C)c4ccc(F)cc4	CHEMBL219601	65			N\C(=N\C(=O)Cn1c(ccc1C23CC4CC(CC(C4)C2)C3)c5ccccc5)\NCCc6ccsc6	CHEMBL404020	565			CCCCNC(=O)[C@@H](NC(=O)[C@@H]1OCC[C@H]1[C@H](O)[C@H](CC(C)C)NC(=O)[C@H](CCSC)NC(=O)[C@H](CC(C)C)NC(=O)C)C(C)C	CHEMBL364664	9560
COCCN(C[C@H]1C[C@@H]1C)c2cc(cc(n2)N(C)S(=O)(=O)C(C)C)C(=O)N[C@@H](Cc3ccccc3)[C@@H](N)COC	CHEMBL429477	66			O=C(Nc1cc(ccc1N2CCNCC2)c3ccccc3)C4=Cc5ccccc5OC4=O	CHEMBL1164612	580			C[C@@H](NC(=O)c1cc(cc(c1)c2ccccc2C(=O)C)C(=O)N[C@H](CO)Cc3ccccc3)c4ccccc4	CHEMBL252351	9900
CC(C)c1cccc(CNC[C@H](O)[C@H](Cc2ccccc2)NC(=O)[C@@H]3CCC[C@@H](C3)C(C)(C)N4CCCCC4=O)c1	CHEMBL1077237	67			CCCOc1ccc(cc1)c2csc(c2CC(=O)NC(=N)N)c3ccccc3Cl	CHEMBL391087	590			COC(=O)[C@@H]1CC(C[C@@H](C1)C(=O)OC)NC(=O)[C@H](NC(=O)C[C@H](O)[C@@H](Cc2cc(F)cc(F)c2)NC(=O)C(O)c3ccccc3c4ccccc4)C(C)C	CHEMBL296166	10000
CCCN(c1cc(cc(n1)N(C)C[C@H]2C[C@@H]2C)C(=O)N[C@@H](Cc3ccccc3)[C@H](C)N)S(=O)(=O)C	CHEMBL399113	67			Nc1cccc(Cn2c(ccc2c3ccc(cc3)C(=O)NCC=C)c4ccccc4)n1	CHEMBL1092227	590			COC(=O)[C@@H]1CCCN1C(=O)[C@@H](Cc2ccccc2)N(C)C(=O)[C@H](C)NC(=O)[C@@H](NC(=O)C[C@H](O)[C@H](CC(C)C)NC(=O)[C@H](CC(=O)N)NC(=O)[C@H](CC(C)C)NC(=O)[C@H](OC(=O)[C@@H](OC(=O)[C@H](C(C)C)N(C)C)C(C)C)C(C)C)[C@@H](C)O	CHEMBL567893	10000
COCc1cc2NCCCCOc3cccc(C[C@H](NC(=O)c(c1)c2)[C@H](O)CNC4(CCC4)c5cccc(c5)C(C)(C)C)c3	CHEMBL595246	67			NC(=N)NC(=O)Cn1c(ccc1c2ccc(cc2)C(F)(F)F)c3ccc(Oc4ccccc4)cc3	CHEMBL399083	600			COc1cccc2C=C(C(=O)Nc3cc(Br)ccc3N4CCOCC4)C(=O)Oc12	CHEMBL379100	10000
C[C@@]1(N)Cc2cccc(CC[C@@H](NC(=O)c3cc(COC1=O)cc(c3)c4ccccc4C#N)c5ccccc5)c2	CHEMBL401180	68			NC(=N)NC(=O)Cn1c(ccc1c2cccc(c2)C#N)c3ccc(Oc4ccccc4)cc3	CHEMBL398316	600			CSCC[C@H](NC(=O)[C@@H](NC(=O)OC(C)(C)C)C(C)C)C(=O)N[C@@H](COCc1cc(F)cc(F)c1)[C@@H](O)C[C@@H](C)C(=O)N[C@@H](C(C)C)C(=O)NCc2ccccc2	CHEMBL1076907	10000
COC[C@H]1CCCN1C(=O)c2cc(C)cc(c2)C(=O)N[C@@H](Cc3cc(F)cc(F)c3)[C@H](O)[C@H]4CN(CCN4)S(=O)(=O)c5ccc(Cl)s5	CHEMBL1097351	68			NC(=NC(=O)Cn1c(ccc1C23CC4CC(CC(C4)C2)C3)c5ccccc5)N	CHEMBL402330	600
NCCCCCN1CCN(CC1)c2ccc(cc2NC(=O)c3cccc4ccccc34)c5ccccc5	CHEMBL379820	68			CCCN1CC(N(CC)C1=O)C(=O)N[C@@H](Cc2cc(F)cc(F)c2)[C@H](O)[C@@H]3NCCN(Cc4ccccc4)C3=O	CHEMBL491660	620
CC[C@H](C)[C@H](NC(=O)C1CCCCO1)C(=O)N[C@@H](C)C(=O)N[C@@H](CC(C)C)[C@@H](O)CC(=O)N[C@@H](C(C)C)C(=O)NCc2cccc(c2)C(=O)O	CHEMBL1791017	69			CCCOc1ccc(cc1)c2scc(c2CC(=O)N=C(N)N)c3ccccc3Cl	CHEMBL237062	630
CC(C)c1cc(ccn1)C2(N=C(N)N(C)C2=O)c3cccc(c3)c4cncnc4	CHEMBL590492	70			CN1C(=NC(C1=O)(c2ccncc2)c3cccc(c3)c4cocc4)N	CHEMBL1090025	630
CC(C)c1cccc(c1)C2(CC2)NC[C@@H](O)[C@@H]3Cc4cccc(OCCCCOc5cc(cc(C)n5)C(=O)N3)c4	CHEMBL600326	70			CC(=O)N[C@@H](Cc1cc(F)cc(F)c1)[C@H](O)CNC2(CC2)c3cc(ccn3)C(C)(C)C	CHEMBL1257418	640
CN1C(=N[C@](C1=O)(c2ccc(OC(F)F)c(C)c2)c3ccc(F)c(OCC(F)F)c3)N	CHEMBL1270530	70			CCNc1cc(cc(c1)C(=O)N[C@@H](Cc2ccccc2)[C@H](O)CNC3CCSCC3)N4CCCC4=O	CHEMBL252058	650
CN1C(=NC(C1=O)(c2cccc(c2)c3cncnc3)c4cnn(c4)C5CCCC5)N	CHEMBL1824142	70			CCCOc1ccc(cc1)c2ccc(c3ccccc3Cl)n2CC(=O)\N=C(\N)/NCc4ccc(O)c(OC)c4	CHEMBL271440	651
CN1C(=NC(C1=O)(c2ccncc2)c3cccc(c3)c4cnccn4)N	CHEMBL1090026	70			Cc1oc(CN\C(=N/C(=O)Cn2c(ccc2C34CC5CC(CC(C5)C3)C4)c6ccccc6)\N)nn1	CHEMBL272766	665
CN1C(=NC(C1=O)(c2ccsc2)c3cccc(c3)c4cncnc4)N	CHEMBL1824346	70			COCC(NC[C@@H](O)[C@@H]1Cc2cccc(OCCCCNc3cc(COC)cc(c3)C(=O)N1)c2)c4cccc(c4)C(C)(C)C	CHEMBL594903	668
COC[C@H]1CCCN1C(=O)c2cc(C)cc(c2)C(=O)N[C@@H](Cc3cc(F)cc(F)c3)[C@H](O)[C@H]4CN(CCN4)S(=O)(=O)c5ccccn5	CHEMBL1097350	70			Brc1ccc(N2CCNCC2)c(NC(=O)C3=Cc4ccccc4OC3=O)c1	CHEMBL1165089	670
COc1ccc(cc1)C2(N=C(N)N3CCCN=C23)c4cccc(c4)c5cccnc5F	CHEMBL584267	70			CCCOc1ccc(cc1)c2scc(c2CC(=O)N=C(N)N)c3ccccc3	CHEMBL236852	680
COc1ccc(cc1OC2CCCC2)C3(N=C(N)N(C)C3=O)c4cccc(c4)c5cccnc5	CHEMBL566638	70			CC(C)[C@@H]1CCC(=O)N(CCc2cccc(Oc3ccc4N=C(N)N1Cc4c3)c2)C5CCOCC5	CHEMBL1097058	685
CSCC[C@H](NC(=O)[C@@H](NC(=O)OC(C)(C)C)C(C)C)C(=O)N[C@@H](Cc1ccccc1)[C@@H](O)C[C@@H](C)C(=O)N[C@@H](C(C)C)C(=O)NCc2ccncc2	CHEMBL310452	70			Nc1ncccc1NCc2cc(ccc2OCc3ccccc3)c4ccc5cc[nH]c5c4	CHEMBL220826	690
Nc1nc(Cn2c(ccc2c3ccccc3Cl)c4ccc(Oc5cncnc5)cc4)ccc1NCCO	CHEMBL1090543	70			O=C(CSc1nc2ccc(Nc3nc(nc(n3)N4CCCC4)N5CCCC5)cc2s1)NCc6occc6	CHEMBL1271091	690
CC1CC1CNc2cc(cc(n2)N(C)S(=O)(=O)C)C(=O)N[C@@H](Cc3ccccc3)[C@@H](N)CCC(F)(F)F	CHEMBL247416	71			COC[C@H]1CCCN1C(=O)c2cc(C)cc(c2)C(=O)N[C@@H](Cc3cc(F)cc(F)c3)[C@H](O)[C@@H]4NCN(Cc5ccccc5)C4=O	CHEMBL451950	700
CCCC(CCC)N1C[C@H](CC1=O)C(=O)N[C@@H](Cc2cc(F)cc(F)c2)[C@H](O)[C@H]3C[C@H](CN3)OCc4ccccc4	CHEMBL255540	71			NC(=N)NC(=O)Cn1c(ccc1c2csc3ccccc23)c4ccc(Oc5ccccc5)cc4	CHEMBL254891	700
CC(=O)N[C@@H](Cc1cc(F)cc(F)c1)[C@H](O)CN[C@]2(CC[C@H](Nc3ccccn3)NC2)c4cccc(c4)C(C)(C)C	CHEMBL571433	73			CCOc1cc(cc(c1)C(=O)N[C@@H](Cc2ccccc2)[C@H](O)CNCc3cccc(OC(F)(F)F)c3)N4CCCCS4(=O)=O	CHEMBL409752	711
CCNC[C@H](O)[C@H](Cc1ccccc1)NC(=O)c2cc3N(C)S(=O)(=O)CCc4cn(CC)c(c2)c34	CHEMBL549458	73			CC(=O)N[C@@H](Cc1cc(F)cc(F)c1)[C@H](O)CNC2(CC2)c3cc(CC(C)(C)C)c[n+]([O-])c3	CHEMBL1257533	720
COc1cccc(CNC[C@H](O)[C@H](Cc2cc(F)cc(F)c2)NC(=O)c3cc(cc(c3)C(=O)N[C@@H](C)c4ccccc4)C(=O)C)c1	CHEMBL538637	73			CC(=O)N[C@@H](Cc1cc(F)cc(F)c1)[C@H](O)CNC2(CCCCC2)c3cccc(c3)S(=O)(=O)C	CHEMBL1208936	720
NC1=Nc2ccc3Oc4cccc(CCN(C5CCOCC5)C(=O)CC[C@@H](C6CCCCC6)N1Cc2c3)c4	CHEMBL1097057	73			NC1=NC(C2=NCCCN12)(c3cccc(c3)c4cccnc4F)c5ccc6OC(F)(F)Oc6c5	CHEMBL566969	740
C[C@H]1C[C@@H]1CNc2cc(cc(n2)N(C)S(=O)(=O)C)C(=O)N[C@H](CO)Cc3cc(F)cc(F)c3	CHEMBL396338	74			N\C(=N\C(=O)Cn1c(ccc1C23CC4CC(CC(C4)C2)C3)c5ccccc5)\NCc6cccc(N)c6	CHEMBL257099	744
CC[C@H](NC(=O)OC(C)(C)C)C(=O)N[C@@H](C)C(=O)N[C@@H](Cc1ccccc1)[C@@H](O)C[C@@H](C)C(=O)N[C@@H](C(C)C)C(=O)NCc2ccncc2	CHEMBL78459	75			CC(=O)N[C@@H](Cc1cc(F)cc(F)c1)[C@H](O)CNC2(CCCCC2)c3cccc(c3)N4CCCOCC4=O	CHEMBL1209285	750
COC[C@H]1CCCN1C(=O)c2cc(C)cc(c2)C(=O)N[C@@H](Cc3cc(F)cc(F)c3)[C@H](O)[C@@H]4NCCN(Cc5ccccc5)C4=O	CHEMBL510659	75			CC(C)CNC(=O)[C@H](CCO)NC[C@H](Cc1ccccc1)NC(=O)c2cc(cc(c2)C(=O)N[C@H](C)c3ccc(F)cc3)N(C)S(=O)(=O)C	CHEMBL379781	751
CCNc1cc(cc(c1)C(=O)N[C@@H](Cc2ccccc2)[C@H](O)CNC3CCCCC3)N4CCCCS4(=O)=O.OC=O	CHEMBL454420	75.11			CCCOc1ccc(cc1)c2ccc(c3ccccc3Cl)n2CC(=O)\N=C(\N)/NCc4cccs4	CHEMBL270154	752
CCCC[C@H](NC[C@@H]1Cc2cccc(CCCCc3cc(cc(c3)C(=O)N1)N(CCC)S(=O)(=O)C)c2)C(=O)NCC(C)C	CHEMBL385374	76			CCCN(CCC)C(=O)c1cc(C)cc(c1)C(=O)N[C@@H](Cc2cc(F)cc(F)c2)[C@H](O)[C@H]3CN(Cc4ccccc4Cl)CCN3	CHEMBL476216	755
COc1cc(cc(c1)C2(CCCCC2)NC[C@@H](O)[C@H](Cc3cc(F)cc(F)c3)NC(=O)C)C(C)(C)C	CHEMBL1257773	77			CCCNC(=O)c1cc(cc(c1)C(=O)N[C@@H](Cc2ccccc2)[C@H](O)CNCc3cccc(OC)c3)C#N	CHEMBL230314	770
C[C@@]1(N)Cc2cccc(CC[C@@H](NC(=O)c3cc(COC1=O)cc(c3)c4ccccc4C#N)c5ccc(F)cc5)c2F	CHEMBL401181	78			C[C@@]1(N)Cc2cccc(CC[C@@H](NC(=O)c3cc(COC1=O)cc(c3)c4occn4)c5ccccc5)c2	CHEMBL251307	780
CCCOc1ccc(cc1)c2ccc(c3ccccc3Cl)n2CC(=O)\N=C(\N)/N[C@@H]4CC[C@H](CC4)C(=O)O	CHEMBL271914	78			CCNc1cc(cc(c1)C(=O)N[C@@H](Cc2ccccc2)[C@H](O)CNC(C)(C)COCC(C)C)N3CCCC3=O	CHEMBL252655	790
O=C(Nc1cc(ccc1N2CCN(CC2)C(=O)c3ccccc3)c4ccccc4)c5cccc6ccccc56	CHEMBL212627	79			CC(=O)N[C@@H](Cc1cc(F)cc(F)c1)[C@H](O)CNC2(CCCCC2)c3cccc(c3)C4CCCC4=O	CHEMBL1209167	800
OCCN1CCN(CC1)c2ccc(Br)cc2NC(=O)c3cccc4ccccc34	CHEMBL213904	79			Nc1cccc(Cn2c(ccc2c3ccccc3Cl)c4ccc(Oc5ccccn5)cc4)n1	CHEMBL1091592	810
C[C@H](Cc1cc2cc(ccc2nc1N)c3ncccc3Cl)C(=O)NCCC(C)(C)C	CHEMBL1821827	80			C[C@@H](NC(=O)c1cc(cc(c1)c2ccc(Cl)cc2)C(=O)N[C@@H](Cc3ccccc3)[C@H](O)CNC4CC4)c5ccccc5	CHEMBL443447	811
CCc1cc(cs1)C2(N=C(N)N(C)C2=O)c3cccc(c3)c4cncnc4	CHEMBL1824349	80			COc1cccc(CNC[C@@H](O)[C@H](Cc2cc(F)cc(F)c2)NC(=O)c3cc(cc(c3)\C(=N/OCc4ccccc4)\C)N5CCCCS5(=O)=O)c1	CHEMBL541738	821
CCCN(CCC)C(=O)c1cc(C)cc(c1)C(=O)N[C@@H](Cc2cc(F)cc(F)c2)[C@H](O)CNCc3cccc(OC)c3	CHEMBL221597	80			CCC[C@H](NC(=O)C)C(=O)N[C@@H](C)C(=O)N[C@@H](CC(C)C)[C@@H](O)CC(=O)N[C@@H](C(C)C)C(=O)NCc1cccc(c1)C(=O)O	CHEMBL136868	830
CCn1cc(cn1)C2(N=C(N)N(C)C2=O)c3cccc(c3)c4cncnc4	CHEMBL1824134	80			CCCc1cc(cc(c1)C(=O)N[C@@H](Cc2ccccc2)[C@H](O)CNCc3cccc(c3)C(F)(F)F)N4CCCCS4(=O)=O	CHEMBL264321	844
CCOc1ccc(cc1OCC)C2(N=C(N)N3CCCN=C23)c4cccc(c4)c5cccnc5F	CHEMBL566978	80			CC(=O)N[C@@H](Cc1cc(F)cc(F)c1)[C@H](O)CNC2(CCCN(C2)C(=O)OCc3ccccc3)c4cccc(c4)C(C)(C)C	CHEMBL570165	860
CN1C(=N[C@@](C1=O)(c2ccccc2)c3ccc(OC(F)F)c(C)c3)N	CHEMBL1270431	80			CN1C(=NC(C2CCCCC2)(C1=O)c3cccc(NC(=O)c4cccn4C)c3)N	CHEMBL591070	860
CN1C(=N[C@](C1=O)(c2ccc(OC(F)F)cc2)c3cccc(c3)C(=O)CCCF)N	CHEMBL1270239	80			CCc1cn2CS(=O)(=O)N(C)c3cc(cc1c23)C(=O)N[C@@H](Cc4ccccc4)[C@H](O)CNC	CHEMBL561838	868
CN1C(=N[C@](C1=O)(c2ccc(OC(F)F)cc2)c3cccc(c3)C(F)CCCF)N	CHEMBL1270336	80			CC(=O)N[C@@H](Cc1cc(F)cc(F)c1)[C@H](O)CNC2(CC2)c3ccn(CC(C)(C)C)n3	CHEMBL1258003	870
CN1C(=NC(C1=O)(c2cccc(c2)c3cncnc3)c4ccnc(C)c4)N	CHEMBL598258	80			CC(C)C[C@H](NC(=O)[C@@H](NC(=O)[C@@H](N)CNC(=O)c1nn[nH]n1)C(C)C)C(=O)NCCC(=O)Nc2cccc(c2)C(=O)O	CHEMBL1645523	870
CN1C(=NC(C1=O)(c2cccc(c2)c3cncnc3)c4csc(Cl)c4)N	CHEMBL1824351	80			CSCC[C@H](NC(=O)[C@H](CC(C)C)NC(=O)C)C(=O)N[C@@H](CC(C)C)[C@@H](O)CC(=O)N[C@@H](C(C)C)C(=O)NCc1cccc(c1)C(=O)O	CHEMBL138002	890
COc1cccc(CNC[C@@H](O)[C@H](Cc2cc(F)cc(F)c2)NC(=O)c3cccc(c3)N(C)S(=O)(=O)C)c1	CHEMBL563604	80			NC(=N)NC(=O)Cn1c(ccc1c2ccc(OCCCC#N)cc2)c3ccccc3	CHEMBL401172	900
NC1=NC(C2=NCCCCN12)(c3ccc(OC(F)(F)F)cc3)c4cccc(c4)c5cccnc5F	CHEMBL565914	80			O[C@H](CNCc1cccc(c1)C(F)(F)F)[C@H](Cc2ccccc2)NC(=O)c3cccc(c3)N4c5ccccc5OS4(=O)=O	CHEMBL1210350	910
NC1=NC(C2=NCCN12)(c3ccc(OC(F)(F)F)cc3)c4cccc(c4)c5cccnc5F	CHEMBL566112	80			CCCCN1CC([C@@H](Cc2ccccc2)C1=O)C(=O)N[C@@H](Cc3cc(F)cc(F)c3)[C@H](O)[C@@H]4NCCN(Cc5ccccc5)C4=O	CHEMBL445693	960
CO\N=C(\C)/c1cc(cc(c1)C(=O)N[C@@H](Cc2cc(F)cc(F)c2)[C@@H](O)CNCc3cccc(OC)c3)C(=O)N[C@@H](C)c4ccccc4	CHEMBL558938	82			CCCN(CCC)C(=O)c1cc(C)cc(c1)C(=O)N[C@@H](Cc2cc(F)cc(F)c2)[C@H](O)[C@H]3CN(Cc4ccccc4C#N)CCN3	CHEMBL455237	970
CC(C)c1cccc(c1)C(C)NC[C@@H](O)[C@@H]2Cc3cccc(OCCCCOc4cc(cc(C)n4)C(=O)N2)c3	CHEMBL591547	83			Nc1cccc(Cn2c(ccc2c3ccccc3Cl)c4ccc(Nc5cncnc5)cc4)n1	CHEMBL1093806	980
CCCN(CCC)C(=O)c1cc(C)cc(c1)C(=O)N[C@@H](Cc2cc(F)cc(F)c2)[C@H](O)[C@H]3CN(CCN3)S(=O)(=O)c4cccs4	CHEMBL1097333	83			CCCc1cc(cc(c1)C(=O)N[C@@H](Cc2ccccc2)[C@H](O)CN[C@@H](C)C(=O)NC3CCCCC3)N4CCCC4=O	CHEMBL257871	990
CCNc1cc(cc(c1)C(=O)N[C@@H](Cc2ccccc2)[C@H](O)CNCc3cccc(Cl)c3)N4CCCC4=O	CHEMBL253719	83			C[C@@H](NC(=O)c1cc(C(=O)N[C@@H](Cc2ccccc2)[C@H](O)CNC3CC3)c4cc(C)oc4c1)c5ccccc5	CHEMBL463865	998
CC(C)C[C@H](NC(=O)[C@@H](NC(=O)[C@@H](N)CNC(=O)C(=O)O)C(C)C)C(=O)N[C@@H](Cc1ccccc1)[C@@H](O)C(=O)N[C@@H](CC(=O)O)C(=O)N[C@@H](C)C(=O)N[C@@H](CCC(=O)O)C(=O)O	CHEMBL183059	84			[Cl-].Clc1ccc(NC(=O)c2cccc(NC(=O)C[n+]3ccccc3)c2)cc1	CHEMBL1163225	1000
CC(C)C[C@H](NC(=O)[C@@H](NC(=O)[C@@H](N)CNC(=O)O)C(C)C)C(=O)N[C@@H](Cc1ccccc1)[C@@H](O)C(=O)N[C@@H](CC(=O)O)C(=O)N[C@@H](C)C(=O)N[C@@H](CCC(=O)O)C(=O)O	CHEMBL39360	84			Brc1ccc(N2CCNCC2)c(NC(=O)c3cccc4ccccc34)c1	CHEMBL378032	1000
CCN1CCN2CCS(=O)(=O)N(C)C3C=C(C=C1C23)C(=O)N[C@@H](Cc4ccccc4)[C@H](O)CNCc5cccc(c5)C(F)(F)F	CHEMBL554792	84			C[C@@H](NC(=O)c1cc(cc(c1)C(=O)N[C@@H](Cc2ccccc2)C(O)C(=O)NCC3CCN(Cc4ccccc4)CC3)N(C)S(=O)(=O)C)c5ccc(F)cc5	CHEMBL507252	1000
CC(=O)N[C@@H](Cc1cc(F)cc(F)c1)[C@H](O)CN[C@]2(CC[C@H](Nc3cccs3)NC2)c4cccc(c4)C(C)(C)C	CHEMBL582817	85			C[C@@H](NC(=O)c1cccc(c1)C(=O)N[C@@H](Cc2ccccc2)[C@H](O)CNCCC3CCN(Cc4ccccc4)CC3)c5ccc(F)cc5	CHEMBL455081	1000
CCc1cn2CCS(=O)(=O)Oc3cc(cc1c23)C(=O)N[C@@H](Cc4ccccc4)[C@@H](O)CNCC5CCOCC5	CHEMBL559954	86			CC(=O)c1ccc(Oc2ccc(cc2)c3ccc(c4ccccc4)n3CC(=O)NC(=N)N)cc1	CHEMBL401289	1000
CO\N=C(/C)\c1cc(cc(c1)C(=O)N[C@@H](Cc2cc(F)cc(F)c2)[C@H](O)CNCc3cccc(OC)c3)N(c4ccccc4)S(=O)(=O)C	CHEMBL539975	86			CC(=O)N[C@@H](Cc1cc(F)cc(F)c1)[C@H](O)CNC2(CCCCC2)c3cccc(c3)N4CCCNC4=O	CHEMBL1209284	1000
CCc1coc2c(cc(cc12)C(=O)N[C@@H](Cc3ccccc3)[C@H](O)CNCc4cccc(c4)C(F)(F)F)N5CCCC5=O	CHEMBL447120	87			CC(C)(C)OC(=O)N1CCN(CC1)c2ccc(Br)cc2NC(=O)C3=Cc4ccccc4OC3=O	CHEMBL207083	1000
CC(=O)N[C@@H](Cc1cc(F)cc(F)c1)[C@H](O)CNC2(CCCCC2)c3cccc(c3)C4CCOC4	CHEMBL1209106	88			CC(C)C[C@H](NC(=O)c1cc(cc(c1)C(=O)N[C@H](C)c2ccc(F)cc2)N(C)S(=O)(=O)C)[C@@H](O)C[C@@H](C)C(=O)NCC3CCN(Cc4ccccc4)CC3	CHEMBL509294	1000
COc1cccc(CNC[C@@H](O)[C@H](Cc2cc(F)cc(F)c2)NC(=O)c3cc(cc(c3)\C(=N/OCc4ccccc4)\C)N(c5ccccc5)S(=O)(=O)C)c1	CHEMBL555916	88			CC(C)C[C@H](NC(=O)c1cc(cc(c1)C(=O)N[C@H](C)c2ccc(F)cc2)N(C)S(=O)(=O)C)[C@@H](O)C[C@@H](C)C(=O)NN3CCN(Cc4ccccc4)CC3	CHEMBL449152	1000
C[C@@H](NC(=O)c1cc2OCCCCc2c(c1)C(=O)N[C@@H](Cc3ccccc3)[C@H](O)CNC4CC4)c5ccccc5	CHEMBL464918	89			CCCN(CCC)C(=O)c1cc(cc(c1)[N+](=O)[O-])C(=O)N[C@@H](Cc2ccccc2)C(O)C(=O)NCC3CCN(Cc4ccccc4)CC3	CHEMBL505994	1000
CC(C)[C@@H]1CCC(=O)N(CCc2cccc(Oc3ccc4N=C(N)N1Cc4c3)c2)C5CCCCC5	CHEMBL1098082	90			Clc1ccc2c(NCCCCCCCNc3c4Cc5ccccc5c4nc6ccccc36)c7CCCCc7nc2c1	CHEMBL1819176	1000
CCc1cn2CCS(=O)(=O)N(C)c3cc(cc1c23)C(=O)N[C@@H](Cc4ccccc4)[C@H](O)CNC5CCOCC5	CHEMBL560612	90			CSCC[C@H](NC(=O)[C@@H](NC(=O)C)C(C)C)C(=O)NC(CC(C)C)C(O)CC(=O)N[C@@H](C(C)C)C(=O)N[C@@H](C)C(=O)N[C@@H](CCC(=O)O)C(=O)O	CHEMBL327386	1000
CCCc1cccc(c1)[C@]2(N=C(N)N(C)C2=O)c3ccc(OC(F)F)cc3	CHEMBL1270026	90			NC1=NC(C2CCCCC2)(C(=O)N1CC3CCCO3)c4ccccc4	CHEMBL592534	1040
CCCCCc1cccc(c1)[C@]2(N=C(N)N(C)C2=O)c3ccc(OC(F)F)cc3	CHEMBL1270027	90			CN1C(=NC(C2CCCCC2)(C3CCCCC3)C1=O)N	CHEMBL589163	1080
CCCN(CCC)C(=O)c1cc(cc(c1)C(=O)N[C@@H](Cc2ccccc2)[C@H](O)CNCc3cccc(OC)c3)C#N	CHEMBL231646	90			CC(=O)N[C@@H](Cc1cc(F)cc(F)c1)[C@H](O)CNC2(CCCCC2)c3cccc(c3)c4occc4	CHEMBL1208997	1100
CCOC(=O)CN1CCN(CC1)c2ccc(cc2NC(=O)c3cccc4ccccc34)c5ccccc5	CHEMBL211256	90			CCCOCc1cccc(C[C@@H]2CS(=O)(=O)C[C@H](NCc3cccc(c3)C(C)C)[C@H]2O)c1	CHEMBL1760734	1100
CN1C(=N[C@](C1=O)(c2ccc(OC(F)F)cc2)c3cccc(\C=C\C4CC4)c3)N	CHEMBL1270434	90			COc1ccc(cc1)C(Cc2cc(ccc2OC)[N+](=O)[O-])c3csc(N)n3	CHEMBL466025	1100
CN1C(=NC(C1=O)(c2cccc(c2)c3cccnc3)c4ccc5OCCOc5c4)N	CHEMBL584917	90			NC(=N)NC(=O)Cn1c(ccc1c2ccccc2Cl)c3ccc(Oc4ccccc4)cc3	CHEMBL398315	1100
CN1C(=NC(C1=O)(c2ccsc2)c3ccc(F)c(c3)c4cccnc4)N	CHEMBL1824356	90			C[C@@H](NC(=O)c1cc(cc(c1)C(=O)N[C@@H](Cc2ccccc2)[C@H](O)CNC3CC3)C#Cc4ccccc4)c5ccccc5	CHEMBL450801	1119
CN1C(=NC(C1=O)(c2ccsc2)c3cccc(c3)c4cnccn4)N	CHEMBL1824359	90			CCCCNC(=O)[C@H](C)C[C@H](O)[C@@H]1COC\C=C\CSC[C@H](NC(=O)C)C(=O)N[C@@H](C)C(=O)N1	CHEMBL212102	1120
COc1ccc(cc1OC)C2(N=C(N)N(C)C2=O)c3cccc(c3)c4cccnc4	CHEMBL566403	90			CC(C)[C@H](F)C(=O)N[C@@H](C)C(=O)N[C@@H](Cc1ccccc1)[C@@H](O)C[C@@H](C)C(=O)N[C@@H](C(C)C)C(=O)NCc2ccncc2	CHEMBL82270	1130
CC[C@H](C)[C@H](NC(=O)C)C(=O)N[C@@H](CCSC)C(=O)N[C@@H](CC(C)C)[C@@H](O)CC(=O)N[C@@H](Cc1ccc(O)cc1)C(=O)NCc2cccc(c2)C(=O)O	CHEMBL1791010	91			COc1ccc2C(=CC(=O)Oc2c1)CC(=O)Nc3cc(Br)ccc3N4CCN(CC4)S(=O)(=O)c5cccs5	CHEMBL205637	1130
CCNc1cc(cc(c1)C(=O)N[C@@H](Cc2ccccc2)[C@H](O)CNC3CCOCC3)N4CCCCS4(=O)=O	CHEMBL560497	91			CCCN(CCC)C(=O)c1cc(C)cc(c1)C(=O)N[C@@H](Cc2cc(F)cc(F)c2)[C@H](O)[C@H]3CN(CCN3)C(=O)c4ccccc4	CHEMBL1097318	1150
COc1cccc(CNC[C@@H](O)[C@H](Cc2cc(F)cc(F)c2)NC(=O)c3cc(cc(c3)\C(=N/O)\C)N(c4ccccc4)S(=O)(=O)C)c1	CHEMBL553458	91			CCNc1cc(cc2N(C)S(=O)(=O)CCCc12)C(=O)N[C@@H](Cc3ccccc3)[C@H](O)CNC4CCOCC4	CHEMBL564712	1185
COc1cccc(CNC[C@H](O)[C@H](Cc2cc(F)cc(F)c2)NC(=O)c3cc(cc(c3)C(=O)NC(C)c4ccc(F)cc4)C(=O)C)c1	CHEMBL541976	91			[Na+].[Na+].[Na+].CC(C)C(\C=C/[C@@H](C)[C@H]1CC[C@H]2[C@@H]3C[C@H](OS(=O)(=O)[O-])[C@H]4C[C@H](OS(=O)(=O)[O-])[C@H](C[C@]4(C)[C@H]3CC[C@]12C)OS(=O)(=O)[O-])C(C)C	CHEMBL1224769	1200
COc1cccc(CNC[C@H](O)[C@H](Cc2cc(F)cc(F)c2)NC(=O)c3cc(cc(c3)C(=O)N[C@@H](C)c4ccccc4)C(C)O)c1	CHEMBL553457	92			CC(C)c1cccc(CN[C@H]2CS(=O)(=O)C[C@@H](Cc3ccc(O)c(CO)c3)[C@@H]2O)c1	CHEMBL1760854	1200
CC(=O)N[C@@H](Cc1cc(F)cc(F)c1)[C@H](O)CNC2(CCCCC2)c3cc(NS(=O)(=O)C)cc(c3)C(C)(C)C	CHEMBL1258001	93			NC(=N)NC(=O)Cn1c(ccc1c2ccc(NC(=O)c3ccc(Cl)cc3Cl)cc2)c4ccccc4	CHEMBL251993	1200
CC(=O)N[C@H](Cc1cc(F)cc(F)c1)[C@@H](O)CNC2(CCc3nc(C)ncc3C2)c4cccc(c4)C(C)(C)C	CHEMBL1163020	93			O[C@@H]([C@H](Cc1cc(F)cc(F)c1)NC(=O)[C@@H]2CN(Cc3nccs3)C(=O)C2)[C@H]4C[C@H](CN4)OCc5ccccc5	CHEMBL430039	1200
COc1ccc2C(=CC(=O)Oc2c1)CC(=O)Nc3cc(Br)ccc3N4CCN(CC4)C(=O)OC(C)(C)C	CHEMBL205309	93			NC1=NC(C2CCCCC2)(C(=O)N1Cc3ccccc3)c4ccccc4	CHEMBL585215	1240
CCCN(CCC)C(=O)c1cc(Oc2ccc(F)cc2)cc(c1)C(=O)N[C@@H](Cc3cc(F)cc(F)c3)[C@@H](O)CNCc4cccc(OC)c4	CHEMBL557554	94			C[C@@H](NC(=O)c1cc(cc(c1)c2cn(Cc3ccccc3)nn2)C(=O)N[C@@H](Cc4ccccc4)[C@H](O)CNC5CC5)c6ccccc6	CHEMBL449578	1256
CS(=O)(=O)Oc1cc(nc(c1)C(=O)N2COC[C@@H]2c3ccccc3)C(=O)N[C@@H](Cc4ccccc4)[C@H](O)C(=O)Nc5cccc(c5)c6nn[nH]n6	CHEMBL399840	96			CNC(=O)c1cc(cc(c1)C(=O)N[C@@H](COCc2cc(F)cc(F)c2)[C@@H](O)C[C@@H](C)C(=O)N[C@@H](C(C)C)C(=O)NCc3ccccc3)N(C)S(=O)(=O)C	CHEMBL1076908	1260
CCOCCCNC(=O)c1cc(NC(=O)Nc2cccc(Cl)c2)ccc1N(C)C	CHEMBL190644	97			C[C@H](NC[C@@H](O)[C@H](Cc1ccccc1)NC(=O)c2cccc(c2)N(C(=O)C)c3ccccc3)C(=O)NC4CCCCC4	CHEMBL1210331	1300
CN(c1cc(cc(c1)C(=O)c2ccccc2)C(=O)N[C@@H](Cc3ccccc3)[C@H](O)CNC4CC4)S(=O)(=O)C	CHEMBL202602	98			CC(=O)N[C@@H](Cc1cc(F)cc(F)c1)[C@H](O)CNC2(CC2)c3cccc(c3)C(=C)C(F)(F)F	CHEMBL1270262	1300
CCN(Cc1ccccc1)Cc2ccc(cc2)C3=Cc4cc(OCCNC(=O)\C=C\c5cc(F)cc(F)c5)ccc4OC3=O	CHEMBL239046	99			CC(=O)N[C@@H](Cc1cc(F)cc(F)c1)[C@H](O)CNC2(CCCCC2)c3cccc(c3)N4CCOC4=O	CHEMBL1209165	1300
CC(=O)N[C@@H](Cc1cc(F)cc(F)c1)[C@H](O)CNC2(CCCCC2)c3cccc(c3)C(=C)C	CHEMBL1209894	100			CCCN(CCC)C(=O)c1cc(C)cc(c1)C(=O)N[C@@H](Cc2cc(F)cc(F)c2)[C@H](O)[C@H]3CN(CCN3)S(=O)(=O)c4ccc(OC)c(OC)c4	CHEMBL1097330	1300
CC[C@H](C[C@H](O)[C@H](Cc1ccccc1)NC(=O)[C@H](C)NC(=O)[C@@H](O)C(C)C)C(=O)N[C@@H](C(C)C)C(=O)N[C@H](C)c2ccccc2	CHEMBL82504	100			CN(c1cc(cc(c1)C(=C)c2ccccc2)C(=O)N[C@@H](Cc3ccccc3)[C@H](O)CNC4CC4)S(=O)(=O)C	CHEMBL201049	1300
CCCN(CCC)C(=O)c1cc(C)cc(c1)C(=O)N[C@@H](Cc2cc(F)cc(F)c2)[C@H](O)[C@H]3CN(CCN3)S(=O)(=O)c4cn(C)cn4	CHEMBL1097332	100			COc1ccccc1c2ccc(c3ccc(Oc4ccccc4)cc3)n2CC(=O)NC(=N)N	CHEMBL252218	1300
CCNc1cc(cc(c1)C(=O)N[C@@H](Cc2ccccc2)[C@H](O)CNCc3cc(OC)cc(OC)c3)N4CCCC4=O	CHEMBL403820	100			NC(=N)NC(=O)Cn1c(ccc1c2cccc(Cl)c2)c3ccc(Oc4ccccc4)cc3	CHEMBL253449	1300
CN1C(=N[C@](C1=O)(c2ccc(OC(F)F)cc2)c3ccc(F)c(OCCCCF)c3)N	CHEMBL1270135	100			CCCN(CCC)C(=O)c1cc(C)cc(c1)C(=O)N[C@@H](Cc2cc(F)cc(F)c2)[C@H](O)[C@H]3C[C@@H](Cc4ccccc4OC)CCN3	CHEMBL257735	1350
CN1C(=NC(C1=O)(c2cccc(c2)c3cccnc3)c4ccnc(C)c4)N	CHEMBL598257	100			CCNc1cc(cc(c1)C(=O)N[C@@H](Cc2ccccc2)[C@H](O)CNCc3ccccc3OC)N4CCCC4=O	CHEMBL429668	1350
CN1C(=NC(C1=O)(c2cccc(c2)c3cncnc3)c4cnn(C)c4)N	CHEMBL1824133	100			CN1C(=NC(C1=O)(c2ccc(OC(F)(F)F)cc2)c3cccc(c3F)c4cncnc4)N	CHEMBL566404	1360
CN1C(=NC(C2CCCCC2)(C1=O)c3cccc(NC(=O)c4occc4)c3)N	CHEMBL590829	100			COc1cccc(c1)C(=O)Nc2cccc(c2)C3(N=C(N)N(C)C3=O)C4CCCCC4	CHEMBL594896	1360
COC[C@H]1CCCN1C(=O)c2cc(C)cc(c2)C(=O)N[C@@H](Cc3cc(F)cc(F)c3)[C@H](O)[C@H]4CN(CCN4)S(=O)(=O)C5CC5	CHEMBL1097354	100			CC(=O)N[C@@H](Cc1cc(F)cc(F)c1)[C@H](O)CNC2(CCCCC2)c3cccc(c3)N4CCNC4=O	CHEMBL1209166	1400
COc1ccc(cc1)C2(N=C(N)N3CCCN=C23)c4cccc(c4)c5cncnc5	CHEMBL582828	100			CC[C@H](C)[C@H](NC(=O)[C@H](Cc1ccccc1)NC(=O)C)C(=O)NC(CC(C)C)C(O)CC(=O)N[C@@H](CC(C)C)C(=O)N	CHEMBL277046	1400
CON[C@H]1CC[C@@](CN1)(NC[C@@H](O)[C@H](Cc2cc(F)cc(F)c2)NC(=O)C)c3cccc(c3)C(C)(C)C	CHEMBL570982	100			CCCCNC(=O)[C@H](C)C[C@H](O)[C@H](CC(C)C)NC(=O)[C@H](CCSC)NC(=O)CCC(C)C	CHEMBL461606	1400
Nc1cccc(Cn2c(ccc2c3ccccc3Cl)c4ccc(Oc5cncnc5)cc4)n1	CHEMBL1091999	100			CN(c1cc(cc(c1)C(=O)N[C@@H](Cc2ccccc2)[C@H](O)CNC3CC3)C(=O)Cc4ccccc4)S(=O)(=O)C	CHEMBL202549	1400
O=C(Nc1cc(ccc1N2CCN(CCCCCN3C(=O)c4ccccc4C3=O)CC2)c5ccccc5)c6cccc7ccccc67	CHEMBL379067	100			CCCc1cccc(c1)C2(N=C(N)N3CCCN=C23)c4ccc(OC(F)(F)F)cc4	CHEMBL583887	1430
CCNc1cc(cc(c1)C(=O)N[C@@H](Cc2ccccc2)[C@H](O)CNCc3cccc(OC(F)(F)F)c3)N4CCCCS4(=O)=O	CHEMBL409753	102			CCCN(CCC)C(=O)c1cc(C)cc(c1)C(=O)N[C@@H](Cc2cc(F)cc(F)c2)[C@H](O)[C@H]3C[C@@H](O)CN3	CHEMBL404680	1450
CCCN(CCC)C(=O)c1cc(C)cc(c1)C(=O)N[C@@H](Cc2cc(F)cc(F)c2)[C@H](O)[C@H]3C[C@H](CCN3)OCC	CHEMBL257278	106			COc1ccc2cc(ccc2c1)c3cn(C[C@@H]4Cc5c(CN4)[nH]c6ccccc56)nn3	CHEMBL1272322	1490
CCN(CCCCCCNC1=CC(=O)C(=CC1=O)NCCCCCCN(CC)Cc2ccccc2OC)Cc3ccccc3OC	CHEMBL231160	108			CCc1cn2CCS(=O)(=O)N(C)c3ccc(C(=O)N[C@@H](COc4cc(F)cc(F)c4)[C@@H](O)C[C@H](COCc5ccc(OC)cc5)OC)c1c23	CHEMBL583304	1500
C[C@@H](NC(=O)c1cc(cc(c1)c2ccccc2C(=O)C)C(=O)N[C@@H](Cc3ccccc3)[C@H](O)CNc4ccccc4)c5ccccc5	CHEMBL400916	110			CCCN(CCC)C(=O)c1cc(C)cc(c1)C(=O)N[C@@H](Cc2cc(F)cc(F)c2)[C@H](O)[C@H]3CN(CCN3)S(=O)(=O)c4ccc(Cl)c(Cl)c4	CHEMBL1097329	1500
CC(=O)N[C@@H](Cc1cc(F)cc(F)c1)[C@H](O)CNC2(CCCCC2)c3cccc(c3)c4cscn4	CHEMBL1209055	110			CO[C@@H](CNc1ccc(F)cc1)C[C@H](O)[C@H](COc2cc(F)cc(F)c2)NC(=O)c3cc(cc(c3)C(=O)N[C@H](C)c4ccccc4)N(C)S(=O)(=O)C	CHEMBL583703	1500
CC(=O)N[C@@H](Cc1cc(F)cc(F)c1)[C@H](O)CNC2(CCOCC2)c3cccc(c3)n4cccn4	CHEMBL1269840	110			COc1cccc(c1)c2ccc(c3ccc(Oc4ccccc4)cc3)n2CC(=O)NC(=N)N	CHEMBL254091	1500
CC(C)C[C@H](NC(=O)[C@H](C)NC(=O)[C@@H](NC(=O)[C@@H](N)CCC(=O)O)C(C)C)[C@@H](O)CC(=O)N[C@@H](C(C)C)C(=O)N[C@@H](C)C(=O)N[C@@H](CCC(=O)O)C(=O)N[C@@H](Cc1ccccc1)C(=O)O	CHEMBL335277	110			CN1C(=NC(C1=O)(c2ccccc2)C34CC5CC(CC(C5)C3)C4)N	CHEMBL585952	1530
CC(C)C[C@H](NC(=O)[C@H](CC(=O)N)NC(=O)[C@@H](NC(=O)[C@@H](N)CCC(=O)O)C(C)C)[C@@H](O)CC(=O)N[C@@H](C(C)C)C(=O)N[C@@H](C)C(=O)N[C@@H](CCC(=O)O)C(=O)N	CHEMBL343757	110			Oc1ccc(cc1)C2=CC(=O)c3c(O)cc(O)c(c3O2)c4cc(ccc4O)C5=CC(=O)c6c(O)cc(O)cc6O5	CHEMBL63354	1540
CC(Cc1cc2cc(ccc2nc1N)c3ccccc3C(=O)C)C(=O)NCCC(C)(C)C	CHEMBL1821830	110			CCNC1=CC(=CC2C1CCCS(=O)(=O)N2C)C(=O)N[C@@H](Cc3ccccc3)[C@H](O)CNC4CC4	CHEMBL561096	1574
CC[C@H](C)[C@H](NC(=O)C)C(=O)N[C@@H](C)C(=O)N[C@@H](CC(C)C)[C@@H](O)CC(=O)N[C@@H](Cc1ccc(O)cc1)C(=O)NCc2cccc(c2)C(=O)O	CHEMBL1791012	110			CC(=O)N[C@@H](Cc1cc(F)cc(F)c1)[C@H](O)CNC2(CCCCC2)c3oc(cn3)C(C)(C)C	CHEMBL1258802	1580
CCC(C)Cc1cccc(c1)[C@]2(N=C(N)N(C)C2=O)c3ccc(OC(F)F)cc3	CHEMBL1270133	110			CC(=O)N[C@@H](Cc1cc(F)cc(F)c1)[C@H](O)CNC2(CCCCC2)c3cccc(c3)n4ccnc4	CHEMBL1209056	1600
CCCC[C@H](N)[C@H](Cc1cc(F)cc(F)c1)NC(=O)c2cc(NCC3CC3C)nc(c2)N(C)S(=O)(=O)C	CHEMBL247043	110			CNC(=O)c1cc(cc(c1)C(=O)N[C@H](COCc2cc(F)cc(F)c2)[C@@H](O)CC(=O)N[C@@H](C(C)C)C(=O)Nc3cc(cc(c3)C(=O)O)C(=O)O)N(C)S(=O)(=O)C	CHEMBL450469	1600
CCCC[C@H](N)[C@H](Cc1ccccc1)NC(=O)c2cc(NCC3CC3C)nc(c2)N(C)S(=O)(=O)C	CHEMBL247415	110			OC(=O)C(F)(F)F.Brc1ccc(N2CCNCC2)c(NC(=O)C3=CC(=O)c4ccccc4O3)c1	CHEMBL381272	1600
CCCCCOc1ccc(cc1)c2ccc(c3ccccc3Cl)n2Cc4ccc(OCCO)c(N)n4	CHEMBL1093807	110			CC(=O)N[C@@H](Cc1cc(F)cc(F)c1)[C@H](O)CNC2(CC2)c3ccc(CC(C)(C)C)s3	CHEMBL1257651	1620
CCCN(CCC)C(=O)c1cc(C)cc(c1)C(=O)N[C@@H](Cc2cc(F)cc(F)c2)[C@H](O)[C@H]3C[C@H](CCN3)OCCOC	CHEMBL257645	110			CC(=O)N[C@@H](Cc1cc(F)cc(F)c1)[C@H](O)CNC2(CC2)c3cccc(c3)C4CCCCO4	CHEMBL1209358	1700
CCNc1cc(cc(N2CCCC2=O)c1OC)C(=O)N[C@@H](Cc3ccccc3)[C@H](O)CNCc4cccc(c4)C(F)(F)F	CHEMBL443509	110			CC(C)(C)OC(=O)N1CCN(CC1)c2ccc(Br)cc2NC(=O)c3ccc4ccccc4n3	CHEMBL206651	1700
OCCN1CCN(CC1)c2ccc(cc2NC(=O)c3cccc4ccccc34)c5ccccc5	CHEMBL377581	110			CC(C)(C)OC(=O)N1CCN(CC1)c2ccc(Br)cc2NC(=O)c3cccc4ccccc34	CHEMBL381618	1700
CCCC(CCC)S(=O)(=O)CC(NC(=O)OCc1ccccc1)C(=O)N[C@@H](Cc2ccccc2)[C@H](O)CNCc3cccc(OC)c3	CHEMBL253800	112			CC1CCc2cccc(C[C@@](C)(N)C(=O)OCc3cc(CC1)cc(c3)N(C)S(=O)(=O)C)c2	CHEMBL394225	1700
CCN(Cc1ccccc1)Cc2ccc(cc2)C3=Cc4ccc(OCCNC(=O)CCc5ccc(F)c(F)c5)cc4OC3=O	CHEMBL271710	114			CCNc1cc(cc(c1)C(=O)N[C@@H](Cc2ccccc2)[C@H](O)CNc3ccccc3)N4CCCC4=O	CHEMBL252861	1700
CCN(Cc1ccccc1)Cc2ccc(cc2)C3=Cc4cc(OCCNC(=O)CCc5ccc(F)c(F)c5)ccc4OC3=O	CHEMBL248922	116			CN1C(=O)CC(C)(CCc2cccc(c2)c3ccccc3)N=C1N	CHEMBL239640	1700
COc1cccc(CNC[C@@H](O)[C@H](Cc2cc(F)cc(F)c2)NC(=O)c3cc(cc(c3)\C(=N/O)\C)N4CCCCS4(=O)=O)c1	CHEMBL557352	117			COc1ccc2C(=CC(=O)Oc2c1)CC(=O)Nc3cc(Br)ccc3N4CCNCC4.OC(=O)C(F)(F)F	CHEMBL205241	1700
CCc1cn2CCS(=O)(=O)N(C)c3cc(cc1c23)C(=O)N[C@@H](Cc4ccccc4)[C@@H](O)CNCC#C	CHEMBL562290	118			NC(=N)NC(=O)Cn1c(ccc1c2ccc(OCC=C)cc2)c3ccccc3	CHEMBL401171	1700
COC[C@H](NC(=O)OC(C)(C)C)C(=O)N[C@@H](C)C(=O)N[C@@H](Cc1ccccc1)[C@@H](O)C[C@@H](C)C(=O)N[C@@H](C(C)C)C(=O)NCc2ccncc2	CHEMBL82594	118			O=C(CSc1nc2ccc(Nc3nc(nc(n3)N4CCCC4)N5CCCC5)cc2s1)NCc6ccccc6	CHEMBL1270780	1700
CC(=O)N[C@@H](Cc1cc(F)cc(F)c1)[C@H](O)CNC2(CCC(=O)CC2)c3cccc(c3)C(C)(C)C	CHEMBL566826	120			N\C(=N\C(=O)Cn1c(ccc1C23CC4CC(CC(C4)C2)C3)c5ccccc5)\NCCCn6ccnc6	CHEMBL256823	1710
CC(=O)N[C@@H](Cc1cc(F)cc(F)c1)[C@H](O)CNC2(CCCCC2)c3cccc(c3)c4cocc4	CHEMBL1208998	120			CCOC(=O)CSc1nc2ccc(Nc3nc(nc(n3)N4CCCC4)N5CCCC5)cc2s1	CHEMBL1270883	1770
CC(C)[C@@H](NC(=O)C[C@@H](O)[C@H](COCc1cc(F)cc(F)c1)NC(=O)c2cc(cc(c2)C(=O)N[C@@H](C)c3ccccc3)N(C)S(=O)(=O)C)C(=O)NCc4ccc(cc4)C(=O)O	CHEMBL506759	120			C[C@@H](NC(=O)c1cc(cc(c1)C(=O)N[C@@H](Cc2ccccc2)[C@H](O)CNC3CC3)N4CCCS4(=O)=O)c5ccccc5	CHEMBL443087	1774
CCCCNC(=O)[C@H](C)C[C@H](O)[C@H](CC(C)C)NC(=O)[C@H](C)NC(=O)[C@H](CC(C)C)NC(=O)C	CHEMBL209795	120			CCCCCS(=O)(=O)c1cccc(c1)C(=O)N[C@@H](Cc2ccccc2)[C@H](O)CN[C@@H](C)C(=O)NC3CCCCC3	CHEMBL402305	1800
CCCN(CCC)C(=O)c1cc(C)cc(c1)C(=O)N[C@@H](Cc2cc(F)cc(F)c2)[C@H](O)[C@H]3CN(CCN3)S(=O)(=O)c4ccccc4	CHEMBL1097319	120			CO[C@@H](COCc1ccc(OC)cc1)C[C@H](O)[C@H](COc2cc(F)cc(F)c2)NC(=O)c3cc(nc(c3)N(C)S(=O)(=O)C)N(C)C[C@H]4C[C@@H]4C	CHEMBL583303	1800
CCCN(CCC)C(=O)c1cc(cc(c1)C(=O)N[C@@H](Cc2cc(F)cc(F)c2)[C@@H](O)CNCc3cccc(OC)c3)\C(=N/OCC=C)\C	CHEMBL541736	120			COc1ccc(cc1)C(Cc2ccc(cc2)C(F)(F)F)c3cn(C)c(N)n3	CHEMBL567718	1800
CN1C(=N[C@](C1=O)(c2ccc(OC(F)F)cc2)c3ccc(F)c(OCCF)c3)N	CHEMBL1270028	120			COc1cccc(c1)C(=O)Nc2ccc(cc2)c3ccc(c4ccccc4)n3CC(=O)NC(=N)N	CHEMBL252190	1800
CN1C(=NC(C1=O)(c2ccc(F)c(c2)c3cncnc3)c4cnn(CC(F)(F)F)c4)N	CHEMBL1824136	120			Oc1cc(O)c2C[C@H](OC(=O)c3cc(O)c(O)c(O)c3)[C@H](Oc2c1)c4cc(O)c(O)c(O)c4	CHEMBL126079	1800
CN1C(=NC(C1=O)(c2cccc(c2)c3cccnc3)c4ccc5OCCc5c4)N	CHEMBL566414	120			Cl.Clc1ccc2c(NCCCCCCCCNC(=O)CCc3ccc4nc(c5CCCOc5c4c3)c6ccccc6)c7CCCCc7nc2c1	CHEMBL552747	1810
COC(=O)c1cc(NC(=O)[C@@H](NC(=O)C[C@H](O)[C@H](Cc2cc(F)cc(F)c2)NC(=O)C(O)c3ccccc3c4ccccc4)C(C)C)cc(c1)C(=O)OC	CHEMBL143687	120			C[C@@H](NC(=O)c1cc(cc(c1)c2onc(n2)[C@](C)(N)Cc3ccccc3)N(C)S(=O)(=O)C)c4ccc(F)cc4	CHEMBL1082894	1830
COc1ccc(cc1C2CCCC2)C3(N=C(N)N(C)C3=O)c4cccc(c4)c5cccnc5	CHEMBL565790	120			CCCN(CCC)C(=O)c1cccc(c1)C(=O)N[C@H](COCc2ccccc2)[C@@H](O)CC(=O)N[C@@H](C(C)C)C(=O)Nc3cc(cc(c3)C(=O)O)C(=O)O	CHEMBL447880	1890
O=C(CSc1nc2ccc(Nc3nc(nc(n3)N4CCCC4)N5CCCC5)cc2s1)Nc6ccccc6	CHEMBL1270884	120			[Cl-].COc1ccc(NC(=O)c2cccc(NC(=O)C[n+]3cccc(c3)C(=O)N)c2)cc1	CHEMBL1164643	1900
CCN(Cc1ccccc1)Cc2ccc(cc2)C3=Cc4ccc(OCCNC(=O)\C=C\c5cc(F)cc(F)c5)cc4OC3=O	CHEMBL271709	121			C[C@H](NC[C@@H](O)[C@H](Cc1ccccc1)NC(=O)c2cccc(c2)N3CCCS3(=O)=O)C(=O)NC4CCCCC4	CHEMBL271437	1900
COc1cccc(CNC[C@@H](O)[C@H](Cc2cc(F)cc(F)c2)NC(=O)c3cc(cc(c3)N(C)S(=O)(=O)C)C(C)O)c1	CHEMBL560711	122			CC(=O)N[C@@H](Cc1cc(F)cc(F)c1)[C@H](O)CNC2(CC2)c3cccc(c3)N4CC5CCC4C5	CHEMBL1209420	1900
CCCOc1ccc(cc1)c2ccc(c3ccccc3Cl)n2CC(=O)\N=C(\N)/NCC(O)CO	CHEMBL430034	124			CC(C)(C)OC(=O)N1CCN(CC1)c2ccc(Br)cc2NC(=O)C3=CC(=O)c4ccccc4O3	CHEMBL206665	1900
CCCOc1ccc(cc1)c2ccc(c3ccccc3Cl)n2CC(=O)\N=C(\N)/N[C@@H]4CC[C@@H](O)CC4	CHEMBL428075	125			NC(=N)NC(=O)Cn1c(ccc1c2ccc(OCc3ccc(cc3)C#N)cc2)c4ccccc4	CHEMBL253421	1900
COc1ccccc1N(c2cccc(c2)C(=O)N[C@@H](Cc3ccccc3)[C@H](O)CN[C@@H](C)C(=O)NC4CCCCC4)S(=O)(=O)C	CHEMBL1210341	126			CCCCNC(=O)[C@@H](NC(=O)[C@H](C)C[C@H](O)[C@@H]1CSC\C=C/CSC[C@H](NC(=O)OC(C)(C)C)C(=O)N[C@@H](C)C(=O)N1)C(C)C	CHEMBL208681	1970
COCC[C@H](NC(=O)[C@@H](NC(=O)OC(C)(C)C)C(C)C)C(=O)N[C@@H](Cc1ccccc1)[C@@H](O)C[C@@H](C)C(=O)N[C@@H](C(C)C)C(=O)NCc2ccncc2	CHEMBL314014	127			C[C@@H](NC(=O)c1cc(cc(c1)c2cn(nn2)[C@H](CNCc3cccc(Br)c3)Cc4ccccc4)N(C)S(=O)(=O)C)c5ccccc5	CHEMBL1795872	2000
CCc1cn2CS(=O)(=O)N(C)c3cc(cc1c23)C(=O)N[C@H](Cc4ccccc4)[C@H](O)CNC(C)(C)CCCC(C)C	CHEMBL535008	129			CO[C@@H](COCC=C)C[C@H](O)[C@H](COc1cc(F)cc(F)c1)NC(=O)c2cc(cc(c2)C(=O)N[C@H](C)c3ccccc3)N(C)S(=O)(=O)C	CHEMBL583700	2030
CCNc1cc(cc(c1)C(=O)N[C@@H](Cc2occc2)[C@H](O)CNCc3cccc(OC)c3)N4CCCCS4(=O)=O	CHEMBL254272	129			C[C@@H](NC(=O)c1cc(cc(c1)c2noc(n2)[C@](C)(N)Cc3ccccc3)N(C)S(=O)(=O)C)c4ccc(F)cc4	CHEMBL1096681	2060
C[C@@]1(N)Cc2cc(F)cc(CC[C@@H](NC(=O)c3cc(COC1=O)cc(c3)c4ccccc4C#N)c5ccc(F)cc5)c2	CHEMBL251309	130			CCCCNC(=O)[C@H](C)C[C@@H](O)[C@@H]1C[C@H](C)CCCCCCCCCC(=O)N[C@@H](C)C(=O)N1	CHEMBL455207	2100
CC(C)c1cccc(CNC[C@H](O)[C@H](Cc2ccccc2)NC(=O)[C@@H]3CCC[C@@H](C3)C(C)(C)N4CCCC4=O)c1	CHEMBL1077236	130			Oc1cc(O)cc(Oc2c(O)cc(O)c3Oc4c(Oc23)c(O)cc5oc6c(Oc7cc(O)cc(O)c7)c(O)cc(O)c6c45)c1	CHEMBL510508	2130
CCC(C)(C)c1cccc(c1)C2(CCCCC2)NC[C@@H](O)[C@H](Cc3cc(F)cc(F)c3)NC(=O)C	CHEMBL1208872	130			[Cl-].Cc1ccc(cc1)C(=O)Nc2cccc(NC(=O)C[n+]3cccc(c3)C(=O)NCCc4ccccc4)c2	CHEMBL1164187	2200
CCCN(CCC)C(=O)c1cc(C)cc(c1)C(=O)N[C@@H](Cc2cc(F)cc(F)c2)[C@H](O)CNCc3ccccc3	CHEMBL221086	130			C[C@@H](NC(=O)c1cc(cc(c1)c2ccsc2)C(=O)N[C@@H](Cc3ccccc3)[C@H](O)CNC4CC4)c5ccccc5	CHEMBL473652	2233
CCCOc1ccc(cc1)c2ccc(c3ccccc3Cl)n2CC(=O)\N=C(\N)/NCCCC(=O)O	CHEMBL273186	130			CN1C(=NC(C1=O)(c2ccccc2)c3ccc(Cl)cc3)N	CHEMBL566007	2250
CN1C(=NC(C1=O)(c2ccncc2)c3cccc(c3)c4ccccc4)N	CHEMBL598876	130			CCCOc1cccc(C[C@@H]2CS(=O)(=O)C[C@H](NCc3cccc(c3)C(C)C)[C@H]2O)c1	CHEMBL1760733	2300
COc1ccc(cc1C)C2(N=C(N)N(C)C2=O)c3ccc(C)c(c3)c4cccnc4	CHEMBL565995	130			O[C@@H](CN(CCc1ccccc1)S(=O)(=O)c2ccc(Cl)cc2)CN3CCN(CC3)C(c4ccccc4)c5ccccc5	CHEMBL1275914	2300
NC1=NC(\C\2=N\CCCCCN12)(c3ccc(OC(F)(F)F)cc3)c4cccc(c4)c5cccnc5F	CHEMBL568960	130			CC(C)CNC(=O)[C@H](C)C[C@H](O)[C@H](CC(C)C)NC(=O)[C@H](Cc1ccccc1)NC(=O)[C@H](CC(C)C)NC(=O)OC(C)(C)C	CHEMBL1099361	2310
CC(=O)N[C@@H](Cc1cc(F)cc(F)c1)[C@H](O)CNC2(CCCCC2)c3cc(CC(C)(C)C)cs3	CHEMBL1258467	131			CC(C)[C@H](NC(=O)[C@H](C)C[C@H](O)[C@@H]1CCCCCC[C@H](N)C(=O)N[C@@H](C)C(=O)N1)C(=O)NCc2ccccc2	CHEMBL200510	2397
CCCN(CCC)C(=O)c1cc(cc(c1)C(=O)OCC)C(=O)N[C@@H](Cc2ccccc2)[C@H](O)CNCc3cccc(OC)c3	CHEMBL394596	132			CC(=O)N[C@@H](Cc1cc(F)cc(F)c1)[C@H](O)CNC2(CC2)c3cccc(c3)N4CC5CC4CO5	CHEMBL1209419	2400
C[C@H](NC[C@H](Cc1ccccc1)NC(=O)c2cc(cc(c2)C(=O)N[C@H](C)c3ccc(F)cc3)N(C)S(=O)(=O)C)C(=O)NC4CC4	CHEMBL208809	133			Cc1ccc(NC(=O)CN2C(=O)\C(=N/NC(=O)c3cc(ccc3O)[N+](=O)[O-])\c4ccccc24)cc1	CHEMBL1080295	2400
CCN(Cc1ccccc1)Cc2ccc(cc2)C3=Cc4cc(OCCNC(=O)\C=C\c5ccc(Cl)c(Cl)c5)ccc4OC3=O	CHEMBL407904	133			COc1cccc2C=C(C(=O)Nc3cc(Br)ccc3N4CCN(CC4)C(=O)OC(C)(C)C)C(=O)Oc12	CHEMBL206854	2400
CCCOc1ccc(cc1)c2ccc(c3ccccc3Cl)n2CC(=O)\N=C(\N)/NCCCC(=O)N	CHEMBL256000	137			CC(=O)N[C@@H](Cc1cc(F)cc(F)c1)[C@H](O)CNC2(CCCCC2)c3cc(ncn3)C(C)(C)C	CHEMBL1257302	2430
COc1cccc(CNC[C@@H](O)[C@H](Cc2cc(F)cc(F)c2)NC(=O)c3cccc(c3)N(c4ccccc4)S(=O)(=O)C)c1	CHEMBL539653	137			COc1ccc(cc1)c2ccc(c3ccccc3Cl)n2Cc4cccc(N)n4	CHEMBL1093152	2450
CC(=O)N[C@@H](Cc1cc(F)cc(F)c1)[C@H](O)CNC2(CCCCC2)c3onc(CC(C)(C)C)c3	CHEMBL1258687	139			C[C@H](NC(=O)c1cc(NC(=O)CC[C@@](O)(Cc2ccccc2)C(=O)N[C@H]3[C@H](O)Cc4ccccc34)cc(c1)N(C)S(=O)(=O)C)c5ccccc5	CHEMBL539397	2500
CC(=O)N[C@@H](Cc1cc(F)cc(F)c1)[C@H](O)CNC2(CC2)c3cccc(c3)C(C)(C)C	CHEMBL1257303	140			CN1C(=NC(C1=O)(c2ccccc2)c3cccc(Cl)c3)N	CHEMBL578410	2500
CC[C@H](C)[C@H](NC(=O)C)C(=O)N[C@@H](CCSC)C(=O)N[C@@H](CC(C)C)[C@@H](O)CC(=O)N[C@@H](Cc1ccccc1)C(=O)NCc2cccc(c2)C(=O)O	CHEMBL1791011	140			O[C@H]1Cc2c(O)cc(O)cc2O[C@@H]1c3cc(O)c(O)c(O)c3	CHEMBL125743	2500
Cl.CCNc1cc(cc(c1)C(=O)N[C@@H](Cc2ccccc2)[C@H](O)CNC)N3CCCCS3(=O)=O	CHEMBL493807	140			COc1cc(cc(c1)C(=O)N[C@@H](Cc2ccccc2)[C@H](O)CNC3CC3)C(=O)N[C@H](C)c4ccccc4	CHEMBL479421	2506
CN1C(=NC(C1=O)(c2cccc(c2)c3cncnc3)c4cc(C)nc(C)c4)N	CHEMBL597062	140			Brc1ccc(N2CCN(CC2)S(=O)(=O)c3cccs3)c(NC(=O)C4=CC(=O)c5ccccc5O4)c1	CHEMBL206097	2600
CN1C(=NC(C1=O)(c2cccc(c2)c3cncnc3)c4csc(C)c4)N	CHEMBL1824347	140			CN1C(=N)N[C@](CCC2CCCCC2)(CC3CCCCC3)C1=O	CHEMBL583178	2600
CO[C@@H](COCc1ccc(OC)cc1)C[C@H](O)[C@H](COc2cc(F)cc(F)c2)NC(=O)c3cc(cc(c3)C(=O)N[C@H](C)c4ccccc4)N(C)S(=O)(=O)C	CHEMBL572692	140			NC1=NC(C2=NCCCN12)(c3ccc(OC(F)(F)F)cc3)c4cccc(Br)c4	CHEMBL567654	2600
CO[C@H]1CC[C@@](CN1)(NC[C@@H](O)[C@H](Cc2cc(F)cc(F)c2)NC(=O)C)c3cccc(c3)C(C)(C)C	CHEMBL571419	140			CC(C)CNC(=O)[C@H](C)C[C@H](O)[C@H](CC(C)C)NC(=O)[C@H](Cc1ccc(cc1)[N+](=O)[O-])NC(=O)c2ccc(cc2)[N+](=O)[O-]	CHEMBL1099022	2640
COC[C@H]1CCCN1C(=O)c2cncc(c2)C(=O)N[C@@H](Cc3cc(F)cc(F)c3)[C@H](O)[C@@H]4NCCN(Cc5ccccc5)C4=O	CHEMBL511110	140			CN1C(=NC(C1=O)(c2ccccc2)c3ccncc3)N	CHEMBL597233	2680
CSCC[C@H](NC(=O)[C@@H](NC(=O)[C@@H](N)CCC(=O)O)C(C)C)C(=O)N[C@@H](CC(C)C)[C@@H](O)CC(=O)N[C@@H](CC(C)C)C(=O)N[C@@H](C)C(=O)N[C@@H](CCC(=O)O)C(=O)N[C@@H](Cc1ccccc1)C(=O)O	CHEMBL134730	140			C[C@@H](NC(=O)c1cc(cc(c1)[N+](=O)[O-])C(=O)N[C@@H](Cc2ccccc2)[C@H](O)CNCCC3CCN(Cc4ccccc4)CC3)c5ccc(F)cc5	CHEMBL505154	2682
N\C(=N\C(=O)Cc1c(csc1c2ccc(cc2)C(=O)NCC3CC3)c4ccccc4Cl)\NCCCO	CHEMBL237493	140			CCNc1cc(cc(c1)C(=O)N[C@@H](Cn2cccn2)[C@H](O)CNCc3cccc(OC)c3)N4CCCCS4(=O)=O	CHEMBL399862	2690
O[C@@H]([C@H](Cc1ccccc1)NC(=O)c2cccc(n2)C(=O)N3COC[C@@H]3c4ccccc4)C(=O)Nc5cccc(c5)c6nn[nH]n6	CHEMBL399839	140			C[C@@H](NC(=O)c1cc(cc(c1)C(=O)NC(CO)(CO)Cc2ccccc2)N(C)S(=O)(=O)C)c3ccc(F)cc3	CHEMBL218846	2700
CCCCN1C[C@H]([C@H](CC)C1=O)C(=O)N[C@@H](Cc2cc(F)cc(F)c2)[C@H](O)[C@H]3C[C@H](CN3)OCc4ccccc4	CHEMBL257433	142			CCCCNC(=O)[C@H](C)C[C@H](O)[C@H](Cc1ccccc1)NC(=O)[C@@H]2CCC[C@@H](C2)C3(CCCC3)NC(=O)C	CHEMBL1084153	2700
CC[C@H](C)NC[C@H](O)[C@H](Cc1ccccc1)NC(=O)c2cc3N(C)S(=O)(=O)CCn4cc(CC)c(c2)c34	CHEMBL556660	144			CCCN(CCC)C(=O)c1cccc(c1)C(=O)N[C@@H](Cc2cc(F)cc(F)c2)[C@@H](O)C[C@@H](CC)C(=O)NCCC(=O)O	CHEMBL295996	2800
CCCN(CCC)C(=O)c1cc(cc(c1)S(=O)(=O)c2ccccc2)C(=O)N[C@@H](Cc3cc(F)cc(F)c3)[C@@H](O)CNCc4cccc(OC)c4	CHEMBL555436	148			COc1ccc(CCNC(=O)CSc2nc3ccc(Nc4nc(nc(n4)N5CCCCC5)N6CCCCC6)cc3s2)cc1OC	CHEMBL1269608	2800
CCN(Cc1ccccc1)Cc2ccc(cc2)C3=Cc4cc(OCCNC(=O)Cc5cc(F)cc(F)c5)ccc4OC3=O	CHEMBL272700	149			CCCC(=O)Nc1cccc(c1)C2(N=C(N)N(C)C2=O)C3CCCCC3	CHEMBL595302	2850
CCNc1cc(cc(c1)C(=O)N[C@@H](Cc2ccccc2)[C@H](O)CNC(C)(C)CCCC(C)C)N3CCCCS3(=O)=O.CC(=O)O	CHEMBL501068	149.3			CCCN(CCC)C(=O)c1cc(C)cc(c1)C(=O)N[C@@H](Cc2cc(F)cc(F)c2)[C@H](O)[C@H]3CN(CCN3)S(=O)(=O)c4cnoc4C	CHEMBL1097335	2900
CC(C)(C)c1cccc(CNC[C@@H](O)[C@H](Cc2cc(F)cc(F)c2)NC(=O)[C@@H]3CN(Cc4cc(F)cc(F)c4)C(=O)N3)c1	CHEMBL260621	150			CN(c1cc2cc(c1)C(=O)NC(CO)Cc3cccc(OCCNC2=O)c3)S(=O)(=O)C	CHEMBL386666	2900
CCCCc1cc(C[C@@H]2CS(=O)(=O)C[C@H](NCc3cccc(c3)C(C)C)[C@H]2O)ccc1O	CHEMBL1760856	150			CC(C)[C@H](NC(=O)[C@@H](NC(=O)[C@@H](N)CNC(=O)c1nn[nH]n1)C(C)C)C(=O)NCC(O)C(=O)Nc2cccc(c2)C(=O)O	CHEMBL1645518	3000
CCCN(CCC)C(=O)c1cc(C)cc(c1)C(=O)N[C@@H](Cc2cc(F)cc(F)c2)[C@H](O)[C@H]3C[C@H](CN3)OCc4ccccc4	CHEMBL270359	150			CC(C)CC(NC(=O)C(O)c1ccccc1Br)[C@@H](O)CC(=O)N[C@H](C(C)C)C(=O)N[C@H](C)C(=O)N[C@H](CCC(=O)O)C(=O)N[C@H](Cc2ccccc2)C(=O)O	CHEMBL51304	3000
CCCN1[C@@H](Cc2cc(C[C@@H]3CS(=O)(=O)C[C@H](NCc4cccc(c4)C(C)C)[C@H]3O)ccc2O)COC1=O	CHEMBL1615184	150			Cc1nc(N\C(=N/C(=O)Nc2ccccc2)\NC(=O)Nc3ccccc3)nc4ccccc14	CHEMBL1782314	3000
CCCOc1ccc(cc1)c2scc(c2CC(=O)\N=C(\N)/NCCCO)c3ccccc3Cl	CHEMBL237063	150			O=C(CSc1nc2ccc(Nc3nc(nc(n3)N4CCCC4)N5CCCC5)cc2s1)NCCOc6ccccc6	CHEMBL1270985	3000
CCN(Cc1ccccc1)Cc2ccc(cc2)C3=Cc4ccc(OCCNC(=O)Cc5cc(F)cc(F)c5)cc4OC3=O	CHEMBL26125	150			CC(=O)N[C@@H](Cc1cc(F)cc(F)c1)[C@H](O)CNC2(CC2)c3csc(CC(C)(C)C)n3	CHEMBL1257894	3050
COc1ccc(cc1C#N)C2(N=C(N)N(C)C2=O)c3cccc(c3)c4cccnc4	CHEMBL568114	150			COc1ccc(cc1)C2(N=C(N)N(C)C2=O)c3ccccc3	CHEMBL577905	3100
CCN(Cc1ccccc1)Cc2ccc(cc2)C3=Cc4ccc(OCCNC(=O)\C=C\c5ccc(Cl)c(Cl)c5)cc4OC3=O	CHEMBL270248	151			CN(C)c1cccc(CNC[C@@H](O)[C@H](Cc2ccccc2)NC(=O)[C@@H]3CN(Cc4ccccc4C(F)(F)F)C(=O)N3)c1	CHEMBL260722	3120
O=C(Nc1cc(ccc1N2CCN(Cc3ccccc3)CC2)c4ccccc4)C5=Cc6ccccc6OC5=O	CHEMBL212578	151			CC[C@H](C)[C@H](O)C(=O)N[C@@H](CC(F)F)C(=O)N[C@@H](Cc1ccccc1)[C@@H](O)C[C@@H](CC(F)F)C(=O)N[C@@H](C(C)C)C(=O)NCc2ccncc2	CHEMBL85379	3180
CC(=O)N[C@@H](Cc1cc(F)cc(F)c1)[C@H](O)CNC2(CCCCC2)c3cn(C[Si](C)(C)C)nn3	CHEMBL1257184	154			CC(C)c1cccc(CNC[C@@H](O)[C@H](Cc2cc(F)cc(F)c2)NC(=O)C)c1	CHEMBL1760861	3200
C[C@@H](NC(=O)c1cc(cc(c1)C(=O)N[C@@H](Cc2ccccc2)[C@H](O)CNC3CC3)N4CCCCS4(=O)=O)c5ccccc5	CHEMBL499468	158			COC1=CC2CCC(Cc3cc(ccc3OC)[N+](=O)[O-])(C2C=C1)c4cn(C)c(N)n4	CHEMBL568557	3200
CC(=O)N[C@@H](Cc1cc(F)cc(F)c1)[C@H](O)CNC2(CCCCC2)c3cc(cc(c3)C(C)(C)C)C(=O)C	CHEMBL1258119	160			COc1ccc(cc1F)C(Cc2cc(ccc2OC)[N+](=O)[O-])c3c[nH]c(N)n3	CHEMBL522520	3200
CC(C)[C@H](NC(=O)[C@H](C)C[C@H](O)[C@H](COc1cc(F)cc(F)c1)NC(=O)c2cc(cc(c2)C(=O)N[C@H](C)c3ccccc3)N(C)S(=O)(=O)C)C(=O)NCc4ccccc4	CHEMBL1076905	160			COc1cc(O)c(CC(CC=C(C)C)C(=C)C)c2O[C@@H](CC(=O)c12)c3ccc(O)cc3O	CHEMBL243796	3300
CCCCO[C@H]1CCN[C@H](C1)[C@@H](O)[C@H](Cc2cc(F)cc(F)c2)NC(=O)c3cc(C)cc(c3)C(=O)N(CCC)CCC	CHEMBL399979	160			CC(=CCC1=C(Oc2c(CC=C(C)C)c(O)cc(O)c2C1=O)c3ccc(O)cc3O)C	CHEMBL518543	3400
CCOc1cc(cc(c1)c2ccccc2C#N)C(=O)N[C@@H](Cc3ccccc3)[C@H](O)CNCc4cccc(c4)C(F)(F)F	CHEMBL253866	160			Nc1cccc(Cn2c(ccc2c3ccc(cc3)C(=O)NC4CCC4)c5ccccc5)n1	CHEMBL1093121	3400
COc1ccc(cc1)C2(N=C(N)N(C)C2=O)C34CC5CC(CC(C5)C3)C4	CHEMBL584694	160			OC1CC(Nc2cccc(c2)c3cn(nn3)[C@H](CNCc4cccc(Br)c4)Cc5ccccc5)C(O)CC1Nc6cccc(c6)C#C	CHEMBL1795873	3400
NC1=NC(C2=NCCCN12)(c3ccc4OCOc4c3)c5cccc(c5)c6cccnc6F	CHEMBL583608	160			CCCCNC(=O)[C@@H](NC(=O)[C@@H]1CN(C)C[C@H]1[C@H](O)[C@H](CC(C)C)NC(=O)[C@H](CCSC)NC(=O)[C@H](CC(C)C)NC(=O)C)C(C)C	CHEMBL439671	3440
COc1cccc(CNC[C@@H](O)[C@H](Cc2cc(F)cc(F)c2)NC(=O)c3cc(cc(c3)\C(=N/OCC=C)\C)N(c4ccccc4)S(=O)(=O)C)c1	CHEMBL557343	162			NC(=N)NC(=O)Cn1c(ccc1c2cc(Cl)ccc2Cl)c3ccccc3	CHEMBL399837	3500
C[C@@H](NC(=O)c1cc(COC(=O)C(C)(N)Cc2ccccc2)cc(c1)N(C)S(=O)(=O)C)c3ccc(F)cc3	CHEMBL1082548	163			OC(=O)C(F)(F)F.Brc1ccc(N2CCNCC2)c(NC(=O)c3ccc4ccccc4n3)c1	CHEMBL377745	3500
COc1cccc(CNC[C@H](O)[C@H](Cc2cc(F)cc(F)c2)NC(=O)c3cc(cc(c3)C(=O)NC(C)c4ccc(F)cc4)C(C)O)c1	CHEMBL556626	164			COc1cccc(CNC[C@@H](O)[C@H](Cc2ccccc2)NC(=O)CCS(=O)(=O)C3CCCCC3)c1	CHEMBL398925	3670
CCCN(CCC)C(=O)c1cc(C)cc(c1)C(=O)N[C@@H](Cc2cc(F)cc(F)c2)[C@H](O)[C@H]3C[C@H](CN3)Oc4ccccc4	CHEMBL403727	165			[Cl-].COc1ccc(NC(=O)c2cccc(NC(=O)C[n+]3ccccc3)c2)cc1	CHEMBL1164437	3700
CC(=O)N[C@@H](Cc1cc(F)cc(F)c1)[C@H](O)CNC2(CCCCC2)c3cccc(c3)C(C)(C)C#N	CHEMBL1208933	166			CC(C)CNC(=O)[C@@H](C[C@H](O)[C@@H]1COCc2cccc(c2)C(NC(=O)c3cc(cc(c3)C(=O)N1)N(C)S(=O)(=O)C)c4ccccc4)C(C)C	CHEMBL1644464	3700
C[C@H](Cc1cc2cc(ccc2nc1N)c3ccccc3C)C(=O)NCC4CCOCC4	CHEMBL1821825	170			CN(c1cc2COC(=O)[C@](C)(N)Cc3cccc(CC[C@@H](NC(c(c2)c1)C(F)(F)F)c4ccccc4)c3)S(=O)(=O)C	CHEMBL392564	3700
CC(=O)N[C@@H](Cc1cc(F)cc(F)c1)[C@H](O)CNC2(CCCCC2)c3cc(O)cc(c3)C(C)(C)C	CHEMBL1257891	170			NC(=N)NC(=O)Cn1c(ccc1c2ccccc2)c3ccccc3	CHEMBL217068	3700
CCCCCOc1ccc(cc1)c2ccc(c3ccccc3Cl)n2Cc4ccc(NCCO)c(N)n4	CHEMBL1089186	170			CC(C)CNC(=O)[C@H](C)C[C@H](O)[C@H](CC(C)C)NC(=O)[C@H](Cc1ccc(cc1)[N+](=O)[O-])NC(=O)\C=C\c2ccc(cc2)C(F)(F)F	CHEMBL1099021	3790
CN1C(=N[C@@](C1=O)(c2ccccc2)c3ccc(OC(F)F)cc3)N	CHEMBL1271343	170			CN1C(=O)CC(C)(N=C1N)c2ccccc2	CHEMBL239638	3800
COc1ccc(cc1C)[C@@]2(N=C(N)N(C)C2=O)C34CC5CC(CC(C5)C3)C4	CHEMBL571320	170			O=C(CCCCC1SCCS1)N2CCN(CC2)c3ccc(cc3NC(=O)c4cccc5ccccc45)c6ccccc6	CHEMBL211097	3800
CCCOc1ccc(cc1)c2ccc(c3ccccc3Cl)n2CC(=O)\N=C(\N)/NCCC(=O)N	CHEMBL272970	172			COc1ccc(cc1OC)C(=O)N[C@@H](Cc2ccc(cc2)[N+](=O)[O-])C(=O)N[C@@H](CC(C)C)[C@@H](O)C[C@@H](C)C(=O)NCC(C)C	CHEMBL1099023	3810
COC[C@H](N)[C@H](Cc1cc(F)cc(F)c1)NC(=O)c2cc(nc(c2)N(C)S(=O)(=O)C)N(C)C[C@H]3C[C@@H]3C	CHEMBL425828	173			CC(C)C[C@H](NC(=O)[C@@H]1CC(=O)NCCCCCOC(=O)N[C@@H](C(C)C)C(=O)N1)[C@@H](O)C[C@@H](C)C(=O)N[C@@H](C(C)C)C(=O)NCc2ccccc2	CHEMBL361977	3900
COC[C@H](N)[C@H](Cc1ccccc1)NC(=O)c2cc(nc(c2)N(C)S(=O)(=O)C)N(C)C[C@H]3C[C@@H]3C	CHEMBL248228	173			C[C@H](NC(=O)c1cc(cc(c1)C(=O)N[C@@H](COc2cc(F)cc(F)c2)[C@@H](O)CC(=O)NCc3ccc(cc3)C(=O)O)N(C)S(=O)(=O)C)c4ccccc4	CHEMBL453705	4000
CC(=O)N[C@@H](Cc1cc(F)cc(F)c1)[C@H](O)CNC2(CCCCC2)c3cc(Br)cc(c3)C(C)(C)C	CHEMBL1257649	174			CC(=O)N[C@@H](Cc1cc(F)cc(F)c1)[C@H](O)CNC2(CC2)c3cccc(c3)C4COCCO4	CHEMBL1209418	4000
CCCN(c1cc2COC[C@](C)(N)Cc3cccc(CC[C@@H](NC(=O)c(c2)c1)C(C)C)c3)S(=O)(=O)C	CHEMBL250712	175			COC(=O)c1ccc(NC(=O)[C@@H](NC(=O)CCC(O)(Cc2ccccc2)C(=O)Nc3cc(cc(c3)C(=O)N[C@@H](C)c4ccc(F)cc4)N(C)S(=O)(=O)C)C(C)C)cc1	CHEMBL556529	4000
CC[C@H](C)[C@H](O)C(=O)N[C@@H](CC(C)C)C(=O)N[C@@H](Cc1ccccc1)[C@@H](O)C[C@@H](CC(C)C)C(=O)N[C@@H](C(C)C)C(=O)NCc2ccncc2	CHEMBL280244	176			CSCC[C@H](NC(=O)[C@@H](NC(=O)OC(C)(C)C)C(C)C)C(=O)NC(CC(C)C)[C@@H](O)CC(=O)N[C@H](C(C)C)C(=O)NCc1ccc(cc1)C(=O)O	CHEMBL297913	4000
COCc1cc2NCCCCOc3cccc(C[C@H](NC(=O)c(c1)c2)[C@H](O)CNC(CF)c4cccc(c4)C(C)(C)C)c3	CHEMBL594709	177			Cc1cccc(c1)C(=O)N[C@@H](Cc2cc(F)cc(F)c2)[C@H](O)CNCc3cccc(I)c3	CHEMBL254626	4100
C[C@H](NC[C@@H](O)[C@H](Cc1ccccc1)NC(=O)c2cccc(c2)N(Cc3ccccc3)S(=O)(=O)C)C(=O)NC4CCCCC4	CHEMBL1210333	180			COc1cccc(CNC[C@@H](O)[C@H](Cc2ccccc2)NC(=O)CCCS(=O)(=O)c3ccccc3)c1	CHEMBL252547	4131
CC(=O)N[C@@H](Cc1cc(F)cc(F)c1)[C@H](O)CNC2(CCCCC2)c3cccc(c3)C4CCCO4	CHEMBL1209105	180			Nc1ncccc1NCc2cc(ccc2OCc3ccccn3)c4ccc5cc[nH]c5c4	CHEMBL220428	4200
CC(C)c1cc(cc(c1)C(=O)N[C@@H](Cc2ccccc2)[C@H](O)CNCc3cccc(c3)C(F)(F)F)N(c4ccccc4)S(=O)(=O)C	CHEMBL1210361	180			O[C@H]1[C@H](Cc2ccc(O)c(Br)c2)CS(=O)(=O)C[C@@H]1NCc3cc(Cl)cc(Cl)c3	CHEMBL1760867	4200
CCc1cc(c(C)s1)C2(N=C(N)N(C)C2=O)c3cccc(c3)c4cncnc4	CHEMBL1824350	180			CC(C)CNC(=O)[C@H](C)C[C@H](O)[C@H](CC(C)C)NC(=O)[C@H](Cc1ccc(cc1)[N+](=O)[O-])NC(=O)c2ccc(Cl)cc2Cl	CHEMBL1099025	4240
CCNc1cc(cc(c1)C(=O)N[C@@H](Cc2ccccc2)[C@H](O)CNC3CCCCC3)N4CCCC4=O	CHEMBL252057	180			CC(C)c1ccnc(CN[C@H]2CS(=O)(=O)C[C@@H](Cc3ccc(O)c(Br)c3)[C@@H]2O)c1	CHEMBL1760864	4300
CCNc1cc(cc2N(C)S(=O)(=O)CCCc12)C(=O)N[C@@H](Cc3ccccc3)[C@H](O)CNCCC(F)(F)F	CHEMBL560894	180			CC(=O)N[C@@H](Cc1cc(F)cc(F)c1)[C@H](O)CNC2(CCCCC2)c3cc(cs3)C#C	CHEMBL1258575	4316
CN(c1cc(cc(c1)C(=O)C2CCCC2)C(=O)N[C@@H](Cc3ccccc3)[C@H](O)CNC4CC4)S(=O)(=O)C	CHEMBL383772	180			CC(=O)N[C@@H](Cc1cc(F)cc(F)c1)[C@H](O)[C@H]2CN(CCN2)S(=O)(=O)c3cccc(C)c3	CHEMBL1087742	4350
COc1cccc(CNC[C@@H](O)[C@H](Cc2cc(F)cc(F)c2)NC(=O)c3cccc(c3)N4CCCCS4(=O)=O)c1	CHEMBL550643	182			CC(C)C[C@H](NC(=O)[C@@H](NC(=O)[C@@H](N)CNC(=O)c1nn[nH]n1)C(C)C)C(=O)O	CHEMBL1645528	4400
C[C@H](NC[C@@H](O)[C@H](Cc1ccccc1)NC(=O)c2cccc(c2)N(c3ccc(cc3)C#N)S(=O)(=O)C)C(=O)NC4CCCCC4	CHEMBL1210348	190			CC(C)[C@H](O)C(=O)N[C@@H](COC(C)(C)C)C(=O)N[C@@H](Cc1ccccc1)[C@@H](O)C[C@@H](C)C(=O)N[C@@H](C(C)C)C(=O)NCc2ccncc2	CHEMBL85378	4490
CC(C)[C@H](N)C(=O)N[C@@H](C)C(=O)N[C@@H](Cc1ccccc1)[C@@H](O)C[C@@H](C)C(=O)N[C@@H](C(C)C)C(=O)NCc2ccncc2	CHEMBL138386	190			Br.CS(=O)(=O)N(c1cccc(c1)C(=O)N[C@@H](Cc2ccccc2)[C@H](O)CNCc3cccc(c3)C(F)(F)F)c4ccccn4	CHEMBL1788375	4570
CC(C)C[C@H](NC(=O)[C@@H](NC(=O)[C@@H](N)CNC(=O)c1nnn[nH]1)C(C)C)C(=O)NC[C@](O)(CCc2ccccc2)C(=O)Nc3cccc(c3)C(=O)O	CHEMBL1229518	190			Fc1cccc(c1)N2C(=O)N=C(NC3CCCCC3)C24CCN(Cc5cccc(c5)c6ccccc6)CC4	CHEMBL522878	4600
CC(C)C[C@H](NC(=O)c1cc(cc(c1)C(=O)N[C@H](CO)c2ccccc2)N(C)S(=O)(=O)C)[C@@H](O)C[C@@H](C)C(=O)N[C@@H](C(C)C)C(=O)NC(C)C	CHEMBL387984	190			CC(C)CNC(=O)[C@H](C)C[C@H](O)[C@H](CC(C)C)NC(=O)[C@H](Cc1ccccc1)NC(=O)c2cccc3ccccc23	CHEMBL1086716	4670
CC1(C)CN2C(=NC(C2=N1)(c3ccc(OC(F)(F)F)cc3)c4cccc(c4)c5cccnc5F)N	CHEMBL566548	190			C[C@@H](NC(=O)c1cc(cc(c1)c2n[nH]c(n2)[C@](C)(N)Cc3ccccc3)N(C)S(=O)(=O)C)c4ccc(F)cc4	CHEMBL1092147	4740
CCCc1cc(C[C@@H]2CS(=O)(=O)C[C@H](NCc3cccc(c3)C(C)C)[C@H]2O)ccc1O	CHEMBL1760857	190			CC(C)[C@H](NC(=O)[C@H](C)C[C@H](O)[C@@H]1CCCCCC[C@H](NC(=O)OC(C)(C)C)C(=O)N[C@@H](C)C(=O)N1)C(=O)NCc2ccncc2	CHEMBL370185	4925
CCCCNC(=O)[C@H](C)C[C@H](O)[C@@H]1CSC\C=C\CS[C@H]2CCCN[C@H]2C(=O)N[C@@H](C)C(=O)N1	CHEMBL210240	190			COc1cccc2C=C(C(=O)Nc3cc(Br)ccc3N4CCNCC4)C(=O)Oc12	CHEMBL1165583	5000
NC1=NC(C2=NCCCN12)(c3ccc4OCCOc4c3)c5cccc(c5)c6cccnc6F	CHEMBL566968	190			CSCC[C@H](NC(=O)[C@@H](NC(=O)C)C(C)C)C(=O)N[C@@H](CC1CCCCC1)C(O)CC(=O)N[C@@H](C(C)C)C(=O)N[C@@H](C)C(=O)N[C@@H](CCC(=O)O)C(=O)N[C@@H](Cc2ccccc2)C(=O)O	CHEMBL89118	5000
CC(C)S(=O)(=O)N(C)c1cc2COC[C@](C)(N)Cc3cccc(CC[C@@H](NC(=O)c(c2)c1)c4ccccc4)c3	CHEMBL251533	196			CSCC[C@H](NC(=O)[C@@H](NC(=O)C)C(C)C)C(=O)NC(CC(C)C)C(O)CC(=O)N[C@@H](C)C(=O)N[C@@H](C)C(=O)N[C@@H](CCC(=O)O)C(=O)N[C@@H](Cc1ccccc1)C(=O)O	CHEMBL90615	5000
COc1cccc(CNC[C@H](O)[C@H](Cc2cc(F)cc(F)c2)NC(=O)c3cccc(c3)C(=O)N[C@@H](C)c4ccccc4)c1	CHEMBL541170	198			CSCC[C@H](NC(=O)[C@@H](NC(=O)OC(C)(C)C)C(C)C)C(=O)NC(CC(C)C)[C@@H](O)CC(=O)N[C@H](C(C)C)C(=O)NCc1cccc(OCC(=O)O)c1	CHEMBL51188	5000
C[C@@H](NC(=O)c1cc(cc(c1)C(=O)N[C@@H](Cc2ccccc2)[C@H](O)CNCc3ccc4ccn(c4c3)S(=O)(=O)C)N(C)S(=O)(=O)C)c5ccccc5	CHEMBL253930	200			Nc1cccc(Cn2c(ccc2c3ccccc3)c4ccccc4)n1	CHEMBL1092879	5200
C[C@@H](NC(=O)c1cc(cc(c1)C(=O)OCC(N)(CO)Cc2ccccc2)N(C)S(=O)(=O)C)c3ccc(F)cc3	CHEMBL375217	200			COc1cccc(CNC[C@@H](O)[C@H](Cc2ccccc2)NC(=O)CCS(=O)(=O)c3ccccc3)c1	CHEMBL437961	5214
CC(=O)N[C@@H](Cc1cc(F)cc(F)c1)[C@H](O)CNC(C)(C)c2cccc(c2)C(C)(C)C	CHEMBL1269949	200			CC(=CCC1=C(Oc2cc(O)cc(O)c2C1=O)c3ccc(O)c4C=CC(C)(C)Oc34)C	CHEMBL1770312	5300
CCNc1cc(cc(c1)C(=O)N[C@@H](Cc2ccccc2)[C@H](O)CNCc3cccc(c3)C(F)(F)F)N4CCCC4=O	CHEMBL403429	200			Oc1cc(O)c2Oc3c(Oc2c1)c(O)cc4Oc5c(O)cc(O)cc5Oc34	CHEMBL559870	5350
CN1C(=N[C@](C1=O)(c2ccc(OC(F)F)cc2)c3cccc(OC(F)F)c3)N	CHEMBL1270241	200			C[C@H](NC[C@@H](O)[C@H](Cc1ccccc1)NC(=O)c2cccc(c2)S(=O)(=O)C)C(=O)NC3CCCCC3	CHEMBL402120	5400
CN1C(=N[C@](C1=O)(c2ccc(OC(F)F)cc2)c3cccc(OCCC(F)(F)F)c3)N	CHEMBL1270136	200			CC[C@H](NCC1Cc2cccc(OCCNC(=O)c3cc(cc(c3)C(=O)N1)N(C)S(=O)(=O)C)c2)C(=O)NCC(C)C	CHEMBL384496	5400
COC(=O)c1ccc(CNC(=O)[C@H](NC(=O)C[C@H](O)[C@H](COc2cc(F)cc(F)c2)NC(=O)c3cc(cc(c3)C(=O)N[C@@H](C)c4ccccc4)N(C)S(=O)(=O)C)C(C)C)cc1	CHEMBL455548	200			O[C@@H](CN(CC1CC1)S(=O)(=O)c2ccc(Cl)c(Cl)c2)CN3CCN(CC3)C(c4ccccc4)c5ccccc5	CHEMBL1276846	5400
N\C(=N\C(=O)Cc1c(csc1c2ccc(cc2)C(=O)NCC(F)(F)F)c3ccccc3Cl)\NCCCO	CHEMBL237283	200			C[C@H](NC[C@@H](O)[C@H](Cc1ccccc1)NC(=O)c2cccc(NS(=O)(=O)Cc3ccccc3)c2)C(=O)NC4CCCCC4	CHEMBL1210335	5500
CCCOc1ccc(cc1)c2ccc(c3ccccc3Cl)n2CC(=O)\N=C(\N)/NCC(C)(C)CO	CHEMBL271422	203			CN(c1cc(cc(c1)C(=O)N[C@@H](Cc2ccccc2)[C@H](O)CNC3CC3)C(O)Cc4ccccc4)S(=O)(=O)C	CHEMBL202015	5500
CCCOc1ccc(cc1)c2ccc(c3ccccc3Cl)n2CC(=O)\N=C(\N)/NCc4ccc(F)c(F)c4F	CHEMBL269943	203			CN(C)c1cccc(CNC[C@@H](O)[C@H](Cc2ccccc2)NC(=O)[C@@H]3CN(Cc4cc(F)c(F)cc4F)C(=O)N3)c1	CHEMBL410865	5590
CCc1cn2CCS(=O)(=O)N(C)c3cc(cc1c23)C(=O)N[C@@H](Cc4ccccc4)[C@@H](O)CNCCF	CHEMBL562703	209			CC(C)[C@H](NC(=O)C[C@H](O)[C@H](CC1CCCCC1)NC(=O)C[C@H](O)[C@H](Cc2ccccc2)NC(=O)[C@H](Cc3ccccc3)NC(=O)C)C(=O)NCc4ccc(cc4)C(=O)O	CHEMBL419949	5600
CC(=O)N[C@@H](Cc1cc(F)cc(F)c1)[C@H](O)CN[C@]2(CC[C@@H](NC2)S(=O)(=O)C)c3cccc(c3)C(C)(C)C	CHEMBL567026	210			CC(C)C[C@H](NC(=O)c1cc(cc(c1)C(=O)NCc2ccccc2)N(C)S(=O)(=O)C)[C@@H](O)C[C@@H](C)C(=O)N[C@@H](C(C)C)C(=O)NC(C)C	CHEMBL227758	5600
CC(=O)N[C@@H](Cc1cc(F)cc(F)c1)[C@H](O)CN[C@]2(CC[C@H](NC=O)NC2)c3cccc(c3)C(C)(C)C	CHEMBL572047	210			NC(=N)NC(=O)Cn1c(ccc1c2ccc(NC(=O)c3cccc(Br)c3)cc2)c4ccccc4	CHEMBL252189	5600
CC(=O)N[C@@H](Cc1cc(F)cc(F)c1)[C@H](O)CNC2(CCCCC2)c3cnn(CC(C)(C)C)c3	CHEMBL1258918	210			COc1ccc(cc1)C(Cc2cc(ccc2OC)[N+](=O)[O-])c3c[nH]c(N)n3	CHEMBL494015	5700
CC(C)[C@H](NC(=O)C[C@H](O)[C@H](COc1cc(F)cc(F)c1)NC(=O)c2cc(cc(c2)C(=O)N[C@@H](C)c3ccccc3)N(C)S(=O)(=O)C)C(=O)NCc4ccccc4	CHEMBL445085	210			C[C@@H](NC(=O)c1cc(CNC(=O)C(C)(N)Cc2ccccc2)cc(c1)N(C)S(=O)(=O)C)c3ccc(F)cc3	CHEMBL1082893	5720
CCc1ccnc2c(cc(cc12)C(=O)N[C@@H](Cc3ccccc3)[C@H](O)CNCc4cccc(c4)C(F)(F)F)N5CCCC5=O	CHEMBL501958	210			CCNc1cc(cc(c1)C(=O)N[C@@H](C(C)C)[C@H](O)CNCc2cccc(OC)c2)N3CCCCS3(=O)=O	CHEMBL254273	5750
COCC(=O)Nc1cccc(c1)C2(N=C(N)N(C)C2=O)C3CCCCC3	CHEMBL589614	210			C[C@@H](NC(=O)c1cc(cc(c1)C(=O)N[C@H](CN)Cc2ccccc2)N(C)S(=O)(=O)C)c3ccc(F)cc3	CHEMBL211937	5900
CS(=O)(=O)N(c1ccncc1)c2cccc(c2)C(=O)N[C@@H](Cc3ccccc3)[C@H](O)CNCc4cccc(c4)C(F)(F)F	CHEMBL1210353	210			CC(C)CC(NC(=O)C(O)c1cccc(Oc2ccccc2)c1)[C@@H](O)CC(=O)N[C@H](C(C)C)C(=O)N[C@H](C)C(=O)N[C@H](CCC(=O)O)C(=O)N[C@H](Cc3ccccc3)C(=O)O	CHEMBL298147	6000
NC1=NC(C2=NCCCN12)(c3ccc(OC(F)(F)F)cc3)c4cccc(CCC5CC5)c4	CHEMBL583888	210			CC(C)C[C@H](NC(=O)[C@@H](NC(=O)[C@@H](N)CNC(=O)c1nn[nH]n1)C(C)C)C(=O)NCC(O)C(=O)O	CHEMBL1645526	6100
CCCO\N=C(\C)/c1cc(cc(c1)C(=O)N[C@@H](Cc2cc(F)cc(F)c2)[C@H](O)CNCc3cccc(OC)c3)N(C)S(=O)(=O)C	CHEMBL558894	217			CC(=O)N[C@@H](Cc1cc(F)cc(F)c1)[C@H](O)CNC2(CCCCC2)c3cccc(c3)C#N	CHEMBL1208934	6200
O[C@@H]([C@H](Cc1cc(F)cc(F)c1)NC(=O)[C@@H]2CN(Cc3cccnc3)C(=O)C2)[C@H]4C[C@H](CN4)OCc5ccccc5	CHEMBL270822	219			CC(C)c1cccc(CN[C@H]2CS(=O)(=O)C[C@@H](Cc3ccc(O)c(Cc4cccc(C)c4)c3)[C@@H]2O)c1	CHEMBL1760853	6200
CC(=O)N[C@@H](Cc1cc(F)cc(F)c1)[C@H](O)CNC2(CCCC2)c3cccc(c3)C(C)(C)C	CHEMBL571833	220			O[C@@H](CN(Cc1ccccc1)S(=O)(=O)c2ccc(Cl)cc2)CN3CCN(CC3)C(c4ccccc4)c5ccccc5	CHEMBL1277921	6300
CC(C)[C@H](NC(=O)[C@H](C)C[C@H](O)[C@H](Cc1ccccc1)NC(=O)[C@H](C)NC(=O)[C@@H](O)CC(F)(F)F)C(=O)NCc2ccncc2	CHEMBL84022	220			COc1cccc(CNC[C@@H](O)[C@H](Cc2ccccc2)NC(=O)CCCS(=O)(=O)N3CCCCC3)c1	CHEMBL252756	6461
CCCCCOc1ccc(cc1)c2ccc(c3ccccc3Cl)n2Cc4ccc(NCCCO)c(N)n4	CHEMBL1089204	220			FC(F)(F)c1ccc(cc1)C2=CC(=O)C(=CC2=O)c3ccccc3	CHEMBL1762560	6520
CCS(=O)(=O)c1cc(cc(c1)C(=O)N[C@@H](Cc2ccccc2)[C@H](O)CNCc3cccc(c3)C(F)(F)F)N(c4ccccc4)S(=O)(=O)C	CHEMBL1210364	220			CCCN(CCC)C(=O)c1cccc(c1)C(=O)N[C@@H](Cc2cc(F)cc(F)c2)[C@@H](O)C[C@@H](CC)C(=O)N[C@H]3C[C@H](C[C@H](C3)OC)OC	CHEMBL295109	6600
COC(=O)c1cc(NC(=O)[C@@H](NC(=O)C[C@H](O)[C@@H](COc2cc(F)cc(F)c2)NC(=O)c3cc(cc(c3)C(=O)N[C@@H](C)c4ccccc4)N(C)S(=O)(=O)C)C(C)C)cc(c1)C(=O)OC	CHEMBL508810	220			NC(=NC(=O)Cc1c(csc1c2ccc(OCCc3cn[nH]c3)cc2)c4ccccc4Cl)N	CHEMBL393559	6900
COC[C@H]1CCCN1C(=O)c2cc(C)cc(c2)C(=O)N[C@@H](Cc3cc(F)cc(F)c3)[C@H](O)[C@H]4CN(CCN4)S(=O)(=O)C	CHEMBL1097355	220			CC(C)CC1(C)NC(=N)N(Cc2ccc(CNC(=O)Nc3ccc(cc3)C#N)cc2)C1=O	CHEMBL584963	7000
C[C@@H](NC(=O)c1cc(cc(c1)c2ccccc2C(=O)C)C(=O)N[C@@H](Cc3ccccc3)[C@H](O)CNCC=C)c4ccccc4	CHEMBL253799	223			CN(c1cc2COC(=O)[C@](C)(N)Cc3cccc(CCC(CCc(c2)n1)c4ccccc4)c3)S(=O)(=O)C	CHEMBL235854	7000
CC(=O)N[C@@H](Cc1cc(F)cc(F)c1)[C@H](O)CNC2(CCCCC2)c3cc(I)cc(c3)C(C)(C)C	CHEMBL1257650	223			COc1cccc(CNC[C@H](Cc2ccccc2)n3cc(nn3)c4cc(cc(c4)C(=O)N[C@H](C)c5ccccc5)N(C)S(=O)(=O)C)c1	CHEMBL1795871	7000
O[C@@H]([C@H](Cc1cc(F)cc(F)c1)NC(=O)[C@@H]2CN(Cc3occc3)C(=O)C2)[C@H]4C[C@H](CN4)OCc5ccccc5	CHEMBL404682	225			OC(=O)c1cc(ccc1Cl)c2oc(\C=N\Nc3nc(Nc4ccc(F)cc4)nc(n3)N5CCOCC5)cc2	CHEMBL1164540	7100
CCc1cn2CCS(=O)(=O)N(C(C)C)c3cc(cc1c23)C(=O)N[C@@H](Cc4ccccc4)[C@H](O)CNC5CCOCC5	CHEMBL553387	227			C(CCCNc1c2CCCCc2nc3ccccc13)CCCNc4c5CCCCc5nc6ccccc46	CHEMBL32823	7500
CCNc1cc(cc(c1)C(=O)N[C@@H](Cc2ccccc2)[C@H](O)CN[C@H]3CCc4ccccc34)N5CCCCS5(=O)=O	CHEMBL254069	229			CN1C(=NC(C)(CC1=O)c2ccc(Cl)c(Cl)c2)N	CHEMBL239425	7500
CC(C)[C@H](NC(=O)C(O)(CCC(=O)Nc1cc(cc(c1)C(=O)N[C@@H](C)c2ccccc2)N(C)S(=O)(=O)C)CCc3ccccc3)C(=O)Nc4ccccc4	CHEMBL540414	230			CC(=O)N[C@@H](Cc1cc(F)cc(F)c1)[C@H](O)CNC2(CCCCC2)c3cccc(c3)n4nccn4	CHEMBL1209057	7700
CCNc1cc(cc(c1)C(=O)N[C@@H](Cc2ccccc2)[C@H](O)CNCc3cnn(CC)c3)N4CCCC4=O	CHEMBL402171	230			C[C@H](NC[C@@H](O)[C@H](Cc1ccccc1)NC(=O)c2cccc(NS(=O)(=O)c3ccccc3)c2)C(=O)NC4CCCCC4	CHEMBL1210334	7900
CCN(Cc1ccccc1)Cc2ccc(cc2)C3=Cc4cc(OC)c(OC)cc4OC3=O	CHEMBL244416	238			CC(C)CNC(=O)[C@H](C)C[C@H](O)[C@H](CC(C)C)NC(=O)[C@H](Cc1ccccc1)NC(=O)c2ccc3OCOc3c2	CHEMBL1088138	8070
CC(=O)N[C@@H](Cc1cc(F)cc(F)c1)[C@H](O)CN[C@]2(CC[C@@H](NC2)N(O)C(=O)C)c3cccc(c3)C(C)(C)C	CHEMBL565337	240			NC(=NC(=O)Cc1c(csc1c2ccccc2)c3ccccc3)N	CHEMBL236850	8300
CC(C)C(=O)c1cc(cc(c1)C(=O)N[C@@H](Cc2ccccc2)[C@H](O)CNC3CC3)N(C)S(=O)(=O)C	CHEMBL370369	240			Oc1cc(O)c(Oc2cc(O)c3Oc4c(Oc5cc(O)cc(O)c5)c(O)cc(O)c4Oc3c2)c(O)c1	CHEMBL456228	8590
CC(C)S[C@H](NC(=O)[C@@H](C[C@H](O)[C@@H]1COCc2cccc(c2)C(NC(=O)c3cc(cc(c3)C(=O)N1)N(C)S(=O)(=O)C)c4ccccc4)C(C)C)C(=O)NCc5ccccc5	CHEMBL1644463	240			Oc1cccc2C(=O)C=C(C(=O)c12)c3ccccc3	CHEMBL1762557	8980
CCCN(CCC)C(=O)c1cc(C)cc(c1)C(=O)N[C@@H](Cc2cc(F)cc(F)c2)[C@H](O)[C@H]3CN(CCN3)S(=O)(=O)c4cccc(Cl)c4	CHEMBL1097324	240			CC(C)OC(=O)CN1C(=C(C(C)C(=C1C)C(=O)N[C@@H](Cc2ccccc2)[C@H](O)CNC3CC3)C(=O)NOCc4ccccc4)C	CHEMBL1165427	9000
CCCN(CCC)C(=O)c1cccc(c1)C(=O)N[C@@H](Cc2cc(F)cc(F)c2)[C@@H](O)C[C@@H](CC)C(=O)NCCCCCC(=O)O	CHEMBL295769	240			COc1ccc(cc1)c2cc(O)cc(c2O)c3ccccc3	CHEMBL1762684	9100
CN1C(=NC(C1=O)(c2ccncc2)c3cccc(c3)c4ccsc4)N	CHEMBL1091441	240			Nc1ncccc1NCc2cccc(c2)c3ccc4cc[nH]c4c3	CHEMBL220896	9100
CO[C@@H](COCc1ccccc1)C[C@H](O)[C@H](COc2cc(F)cc(F)c2)NC(=O)c3cc(cc(c3)C(=O)N[C@H](C)c4ccccc4)N(C)S(=O)(=O)C	CHEMBL572773	240			O=C1C=C(C(=O)c2ccccc12)c3ccccc3	CHEMBL1762552	9330
COC(=O)N[C@H]1CC[C@@](CN1)(NC[C@@H](O)[C@H](Cc2cc(F)cc(F)c2)NC(=O)C)c3cccc(c3)C(C)(C)C	CHEMBL571432	240			CC(=O)N[C@@H](Cc1cc(F)cc(F)c1)[C@H](O)CNC2(CC2)c3nc(CC(C)(C)C)cs3	CHEMBL1257893	9360
N\C(=N\C(=O)Cn1c(ccc1C23CC4CC(CC(C4)C2)C3)c5ccccc5)\NCCCO	CHEMBL403819	240			CC(C)C[C@H](NC(=O)[C@H](CC(=O)N)NC(=O)[C@@H](NC(=O)[C@@H](N)CCC(=O)O)C(C)C)[C@@H](O)CC(=O)N[C@@H](C(C)C)C(=O)N	CHEMBL137547	9400
CCCOc1ccc(cc1)c2ccc(c3ccccc3Cl)n2CC(=O)\N=C(\N)/NCCCn4ccnc4	CHEMBL272719	241			CCCCNC(=O)[C@@H](NC(=O)[C@@H]1OCC[C@H]1[C@H](O)[C@H](CC(C)C)NC(=O)[C@H](CCSC)NC(=O)[C@H](CC(C)C)NC(=O)C)C(C)C	CHEMBL364664	9560
CCNC(=O)[C@H](C)NC[C@H](Cc1ccccc1)NC(=O)c2cc(cc(c2)C(=O)N[C@H](C)c3ccc(F)cc3)N(C)S(=O)(=O)C	CHEMBL208808	242			C[C@@H](NC(=O)c1cc(cc(c1)c2ccccc2C(=O)C)C(=O)N[C@H](CO)Cc3ccccc3)c4ccccc4	CHEMBL252351	9900
COc1cccc(CNC[C@@H](O)[C@H](Cc2cc(F)cc(F)c2)NC(=O)c3cc(cc(c3)\C(=N\OCC(C)C)\C)N(c4ccccc4)S(=O)(=O)C)c1	CHEMBL539468	242			Brc1ccc(N2CCOCC2)c(NC(=O)C3=Cc4ccccc4OC3=O)c1	CHEMBL212873	10000
CS(=O)(=O)N(c1ccccc1)c2cccc(c2)C(=O)N[C@@H](Cc3ccccc3)[C@H](O)CNC4CCCCC4	CHEMBL1210432	243			CC(C)(C)OC(=O)N1CCN(CC1)c2ccc(cc2NC(=O)C3=Cc4ccccc4OC3=O)c5ccccc5	CHEMBL210451	10000
CCc1cn2CCS(=O)(=O)N(CC(F)(F)F)c3cc(cc1c23)C(=O)N[C@H](Cc4ccccc4)[C@H](O)CNC5CCOCC5	CHEMBL537300	248			CCCN(CCC)C(=O)c1cc(C)cc(c1)C(=O)N[C@@H](Cc2cc(F)cc(F)c2)[C@H](O)[C@H]3CN(CCN3)c4ccccc4	CHEMBL510737	10000
COc1cccc(CNC[C@@H](O)[C@H](Cc2cc(F)cc(F)c2)NC(=O)c3cc(cc(c3)C(=O)C)N4CCCCS4(=O)=O)c1	CHEMBL555519	248			COC(=O)[C@@H]1CC(C[C@@H](C1)C(=O)OC)NC(=O)[C@H](NC(=O)C[C@H](O)[C@@H](Cc2cc(F)cc(F)c2)NC(=O)C(O)c3ccccc3c4ccccc4)C(C)C	CHEMBL296166	10000
C[C@H](Cc1cc2cc(ccc2nc1N)c3ccccc3C)C(=O)NCCC(C)(C)C	CHEMBL1821820	250			COC(=O)[C@@H]1CCCN1C(=O)[C@@H](Cc2ccccc2)N(C)C(=O)[C@H](C)NC(=O)[C@@H](NC(=O)C[C@H](O)[C@H](CC(C)C)NC(=O)[C@H](CC(=O)N)NC(=O)[C@H](CC(C)C)NC(=O)[C@H](OC(=O)[C@@H](OC(=O)[C@H](C(C)C)N(C)C)C(C)C)C(C)C)[C@@H](C)O	CHEMBL567893	10000
CC(=O)N[C@@H](Cc1cc(F)cc(F)c1)[C@H](O)CNC2(CCCCC2)c3cccc(c3)N4CCCCC4=O	CHEMBL1209222	250			COc1cccc2C=C(C(=O)Nc3cc(Br)ccc3N4CCOCC4)C(=O)Oc12	CHEMBL379100	10000
CC(C)C[C@@H](NC(=O)[C@H](CC(=O)N)NC(=O)[C@@H](NC(=O)[C@@H](N)CCC(=O)O)C(C)C)[C@H](O)C[C@@H](C)C(=O)N[C@@H](C)C(=O)N[C@@H](CCC(=O)O)C(=O)N[C@@H](Cc1ccccc1)C(=O)O	CHEMBL1214094	250			CSCC[C@H](NC(=O)[C@@H](NC(=O)OC(C)(C)C)C(C)C)C(=O)N[C@@H](COCc1cc(F)cc(F)c1)[C@@H](O)C[C@@H](C)C(=O)N[C@@H](C(C)C)C(=O)NCc2ccccc2	CHEMBL1076907	10000
CC[C@H](C)[C@H](NC(=O)C)C(=O)N[C@@H](C)C(=O)N[C@@H](CC(C)C)[C@@H](O)CC(=O)N[C@@H](Cc1ccccc1)C(=O)NCc2cccc(c2)C(=O)O	CHEMBL1791013	250
CCc1cn2CCS(=O)(=O)Oc3cc(cc1c23)C(=O)N[C@@H](Cc4ccccc4)[C@@H](O)CNC5CC5	CHEMBL556087	250
CCCN(CCC)C(=O)c1cc(cc(c1)C(=O)N(CCC)CCC)C(=O)N[C@@H](Cc2ccccc2)[C@H](O)CNCc3cccc(OC)c3	CHEMBL124380	250
CCOc1cc(cc(c1)C2=C(C)CCC2=O)C(=O)N[C@@H](Cc3ccccc3)[C@H](O)CNCc4cccc(c4)C(F)(F)F	CHEMBL400654	250
CN1C(=NC(C1=O)(c2cccc(c2)c3cccnc3)c4ccc5OCOc5c4)N	CHEMBL566415	250
CN1C(=NC(C1=O)(c2ccncc2)c3cccc(c3)c4cccc(OC(F)(F)F)c4)N	CHEMBL1092125	250
COc1cccnc1c2ccc3nc(N)c(CC(C)C(=O)NCCC(C)(C)C)cc3c2	CHEMBL1821828	250
N\C(=N\C(=O)Cn1c(ccc1C23CC4CC(CC(C4)C2)C3)c5ccccc5)\NCCCC#N	CHEMBL438355	255
N\C(=N\C(=O)Cn1c(ccc1C23CC4CC(CC(C4)C2)C3)c5ccccc5)\NCCCCO	CHEMBL404897	255
CC(=O)N[C@@H](Cc1cc(F)cc(F)c1)[C@H](O)CNC2(CCCCC2)c3cccc(c3)C(C)(C)CO	CHEMBL1208935	260
CC(C)[C@H](NC(=O)C[C@H](O)[C@H](COc1cc(F)cc(F)c1)NC(=O)c2cc(cc(c2)C(=O)N[C@@H](C)c3ccccc3)N(C)S(=O)(=O)C)C(=O)Nc4ccc(cc4)C(=O)O	CHEMBL500251	260
CCc1cn2CCS(=O)(=O)Nc3cc(cc1c23)C(=O)N[C@H](Cc4ccccc4)[C@@H](O)CNCc5cccc(OC)c5	CHEMBL540685	260
CCCNC(=O)c1ccc(cc1)c2scc(c2CC(=O)\N=C(\N)/NCCCO)c3ccccc3Cl	CHEMBL237284	260
CN1C(=N[C@](C1=O)(c2ccc(OC(F)F)cc2)c3cccc(c3)C#C)N	CHEMBL1270833	260
C[C@@H](NC(=O)c1cc(cc2OCCCCc12)C(=O)N[C@@H](Cc3ccccc3)[C@H](O)CNC4CC4)c5ccc(F)cc5	CHEMBL446879	262
COc1cccc(CNC[C@H](O)[C@H](Cc2cc(F)cc(F)c2)NC(=O)c3cccc(c3)C(=O)NC(C)c4ccc(F)cc4)c1	CHEMBL555435	266
CCCOc1ccc(cc1)c2ccc(c3ccccc3Cl)n2CC(=O)\N=C(\N)/NCCC4OCCO4	CHEMBL272718	269
C[C@@]1(N)Cc2cccc(CC[C@@H](NC(=O)c3cc(Br)cc(COC1=O)c3)c4ccccc4)c2	CHEMBL251118	270
CC(=O)N[C@@H](Cc1cc(F)cc(F)c1)[C@H](O)CNC2(CCCOC2)c3cccc(c3)n4cccn4	CHEMBL572313	270
CCOCCN1C[C@H](CC1=O)C(=O)N[C@@H](Cc2cc(F)cc(F)c2)[C@H](O)[C@H]3C[C@H](CN3)OCc4ccccc4	CHEMBL401717	270
COC[C@H]1CCCN1C(=O)CCCC(=O)N[C@@H](Cc2cc(F)cc(F)c2)[C@H](O)[C@H]3CN(CCN3)S(=O)(=O)c4cccc(C)c4	CHEMBL1097343	270
COc1ccc(cc1OC)C2(N=C(N)N(C)C2=O)C34CC5CC(CC(C5)C3)C4	CHEMBL567485	270
CS(=O)(=O)N(c1ccccc1)c2cc(cc(c2)C(=O)N[C@@H](Cc3ccccc3)[C@H](O)CNCc4cccc(c4)C(F)(F)F)C5CCCC5	CHEMBL1210434	275
Cc1csc(CN\C(=N/C(=O)Cn2c(ccc2C34CC5CC(CC(C5)C3)C4)c6ccccc6)\N)n1	CHEMBL404166	276
CO\N=C(\C)/c1cc(cc(c1)C(=O)N[C@@H](Cc2cc(F)cc(F)c2)[C@@H](O)CNCc3cccc(OC)c3)C(=O)NC(C)c4ccc(F)cc4	CHEMBL539467	276
CCCOc1ccc(cc1)c2ccc(c3ccccc3Cl)n2CC(=O)\N=C(\N)/NCCC(=O)O	CHEMBL270820	278
CC1CC1CNc2cc(cc(n2)N(C)S(=O)(=O)C)C(=O)N[C@H](CN)Cc3ccccc3	CHEMBL393850	279
CC1CC1CNc2cc(cc(n2)N(C)S(=O)(=O)C)C(=O)N[C@H](CN)Cc3cc(F)cc(F)c3	CHEMBL230250	280
CCc1cc(ccc1OC)C2(N=C(N)N(C)C2=O)C34CC5CC(CC(C5)C3)C4	CHEMBL584109	280
CCCCNC(=O)c1ccc(cc1)c2scc(c2CC(=O)\N=C(\N)/NCCCO)c3ccccc3Cl	CHEMBL391109	280
CCOc1cc(cc(c1)c2ccccc2C(=O)C)C(=O)N[C@@H](Cc3ccccc3)[C@H](O)CNCc4cccc(c4)C(F)(F)F	CHEMBL401067	280
CC(C)[C@H](NC(=O)[C@H](C)C[C@H](O)[C@H](Cc1ccccc1)NC(=O)[C@H](C)NC(=O)[C@H](CC(F)(F)C(F)F)NC(=O)OC(C)(C)C)C(=O)NCc2ccncc2	CHEMBL82607	281
CCNc1cc(N2CCCCS2(=O)=O)c(F)c(c1)C(=O)N[C@@H](Cc3ccccc3)[C@H](O)CNCc4cccc(OC)c4	CHEMBL264322	283
N\C(=N\C(=O)Cn1c(ccc1C23CC4CC(CC(C4)C2)C3)c5ccccc5)\N[C@@H]6CC[C@@H](O)CC6	CHEMBL402576	283
CC(C)[C@H](NC(=O)[C@H](C)C[C@H](O)[C@@H]1CCCCCC[C@H](NC(=O)OC(C)(C)C)C(=O)N[C@@H](C)C(=O)N1)C(=O)NCc2ccccc2	CHEMBL200195	285
CC(=O)N[C@@H](Cc1cc(F)cc(F)c1)[C@H](O)CNC2(CC2)c3cccc(c3)C(C)(C)CF	CHEMBL1270263	290
CC(=O)N[C@@H](Cc1cc(F)cc(F)c1)[C@H](O)CNC2(CCOCC2)c3cccc(c3)C4CCOC4	CHEMBL1269841	290
CCCN(c1cc2COC[C@](C)(N)Cc3cccc(CC[C@H](C)NC(=O)c(c2)c1)c3)S(=O)(=O)C	CHEMBL399776	290
CS(=O)(=O)N(c1cccc(c1)C(=O)N[C@@H](Cc2ccccc2)[C@H](O)CNCc3cccc(c3)C(F)(F)F)c4ccccn4	CHEMBL1210351	290
Nc1cccc(Cn2c(ccc2c3ccccc3Cl)c4ccc(Oc5cccs5)cc4)n1	CHEMBL1092913	290
O[C@@H]([C@H](Cc1cc(F)cc(F)c1)NC(=O)[C@@H]2CN(Cc3ccccc3)C(=O)C2)[C@H]4C[C@H](CN4)OCc5ccccc5	CHEMBL271249	290
CC(C)c1cccc(CNC[C@@H](O)[C@@H]2Cc3cccc(OCCCCNc4cccc(c4)C(=O)N2)c3)c1	CHEMBL589368	292
CCCCCN1C[C@H]([C@H](Cc2ccccc2)C1=O)C(=O)N[C@@H](Cc3cc(F)cc(F)c3)[C@H](O)[C@H]4C[C@H](CN4)OCc5ccccc5	CHEMBL255400	293
CCCCCN1C[C@H]([C@H](C2CCCC2)C1=O)C(=O)N[C@@H](Cc3cc(F)cc(F)c3)[C@H](O)[C@H]4C[C@H](CN4)OCc5ccccc5	CHEMBL403253	295
C[C@H](NC[C@@H](O)[C@H](Cc1ccccc1)NC(=O)c2cccc(c2)N(C3CCCCC3)S(=O)(=O)C)C(=O)NC4CCCCC4	CHEMBL1210332	300
CC(C)C[C@H](NC(=O)[C@@H](C[C@@H](O)[C@H](Cc1ccccc1)NC(=O)OC(C)(C)C)Cc2ccccc2)C(=O)N[C@@H](Cc3ccccc3)C(=O)N	CHEMBL302004	300
CC(C)c1cc(cc(C)n1)C2(N=C(N)N(C)C2=O)c3cccc(c3)c4cncnc4	CHEMBL597073	300
CCCN(CCC)C(=O)c1cc(C)cc(c1)C(=O)N[C@@H](Cc2cc(F)cc(F)c2)[C@H](O)[C@@H]3NCCN(Cc4ccccc4)C3=O	CHEMBL509210	300
CCCN(CCC)C(=O)c1cc(cc(c1)C(=O)N[C@@H](Cc2ccc(O)cc2)[C@H](O)CNCc3cccc(OC)c3)C(=O)N	CHEMBL397715	300
CSCC[C@H](NC(=O)[C@@H](NC(=O)OC(C)(C)C)C(C)C)C(=O)NC(CC(C)C)[C@@H](O)CC(=O)N[C@H](C(C)C)C(=O)NC1C[C@H](C[C@H](C1)C(=O)O)C(=O)O	CHEMBL50930	300
O=C(Nc1cc(ccc1N2CCNCC2)c3ccccc3)c4cccc5ccccc45	CHEMBL211995	300
O[C@@H]([C@H](Cc1cc(F)cc(F)c1)NC(=O)[C@@H]2CN(Cc3cccs3)C(=O)C2)[C@H]4C[C@H](CN4)OCc5ccccc5	CHEMBL402754	303
CCNc1cc(cc(c1)C(=O)N[C@@H](Cc2ccccc2)[C@H](O)CNCCCCC(C)C)N3CCCC3=O	CHEMBL428587	305
COc1cccc(CNC[C@@H](O)[C@H](Cc2cc(F)cc(F)c2)NC(=O)c3cc(cc(c3)N4CCCCS4(=O)=O)C(C)O)c1	CHEMBL541977	305
C[C@H](NC[C@@H](O)[C@H](Cc1ccccc1)NC(=O)c2cccc(c2)N(c3ccccc3C#N)S(=O)(=O)C)C(=O)NC4CCCCC4	CHEMBL1210342	310
CCCN(CCC)C(=O)c1cccc(c1)C(=O)N[C@@H](Cc2cc(F)cc(F)c2)[C@@H](O)C[C@@H](CC(C)C)C(=O)NC[C@@H]3CC[C@H](CC3)C(=O)O	CHEMBL295535	310
CCCN(CCC)C(=O)c1cccc(c1)C(=O)N[C@@H](Cc2cc(F)cc(F)c2)[C@@H](O)C[C@@H](CC)C(=O)NCCCC(=O)O	CHEMBL288342	310
CCCN(CCC)C(=O)c1cccc(c1)C(=O)N[C@@H](Cc2ccccc2)[C@H](O)CNCc3cccc(I)c3	CHEMBL254625	310
N\C(=N\C(=O)Cn1c(ccc1C23CC4CC(CC(C4)C2)C3)c5ccccc5)\NCCC#N	CHEMBL258356	310
NC1=Nc2ccc3Oc4cccc(CCN([C@@H]5CC[C@@H](CC5)C(=O)O)C(=O)CC[C@@H](C6CCCCC6)N1Cc2c3)c4	CHEMBL1097281	310
O[C@@H]([C@H](Cc1cc(F)cc(F)c1)NC(=O)[C@@H]2CN(Cc3ccccn3)C(=O)C2)[C@H]4C[C@H](CN4)OCc5ccccc5	CHEMBL404839	312
CC(=O)N[C@@H](Cc1cc(F)cc(F)c1)[C@H](O)CNC2(CCCCC2)c3cc(N)cc(c3)C(C)(C)C	CHEMBL1257892	318
CC(C)c1cc(cs1)C2(CCCCC2)NC[C@@H](O)[C@H](Cc3cc(F)cc(F)c3)NC(=O)C	CHEMBL1258352	320
CN1C(=NC(C1=O)(c2ccc(OC(F)(F)F)cc2)c3cc(F)cc(c3)c4cncnc4)N	CHEMBL566633	320
CCCOc1ccc(cc1)c2ccc(c3ccccc3Cl)n2CC(=O)\N=C(\N)/NCCCSC	CHEMBL403107	321
CC(=O)N[C@@H](Cc1cc(F)cc(F)c1)[C@H](O)CNC2(CCCN(C2)C(=O)N)c3cccc(c3)C(C)(C)C	CHEMBL570519	330
CC(C)Nc1cc(cc(c1)C(=O)N[C@@H](Cc2ccccc2)[C@H](O)CN[C@@H](C)C(=O)NC3CCCCC3)N4CCCC4=O	CHEMBL227053	330
CCCN(CCC)C(=O)c1cc(C)cc(c1)C(=O)N[C@@H](Cc2cc(F)cc(F)c2)[C@H](O)[C@H]3C[C@@H](Cc4cccc(OC)c4)CCN3	CHEMBL257907	330
CCCN(CCC)C(=O)c1cc(C)cc(c1)C(=O)N[C@@H](Cc2cc(F)cc(F)c2)[C@H](O)[C@H]3CCCN3	CHEMBL256434	330
CCNc1cc(cc(c1)C(=O)N[C@@H](Cc2ccccc2)[C@H](O)CNCc3cccc(OC)n3)N4CCCC4=O	CHEMBL254138	330
CCOc1ccc(cc1)C2(N=C(N)N(C)C2=O)C34CC5CC(CC(C5)C3)C4	CHEMBL566198	330
CN1C(=N[C@](C1=O)(c2ccc(OC(F)F)cc2)c3cccc(c3)C#CC4CCCCC4)N	CHEMBL1271345	330
O[C@@H]([C@H](Cc1cc(F)cc(F)c1)NC(=O)[C@@H]2CN(Cc3cccc(F)c3)C(=O)C2)[C@H]4C[C@H](CN4)OCc5ccccc5	CHEMBL402374	338
CCc1cn2CCCS(=O)(=O)Nc3cc(cc1c23)C(=O)N[C@@H](Cc4ccccc4)[C@H](O)CNc5ccc(OC)cc5	CHEMBL553938	339
CC(=O)N[C@@H](Cc1cc(F)cc(F)c1)[C@H](O)CNC2(CCCCC2)c3cccc(c3)N4C5CCC(C5)C4=O	CHEMBL1209221	340
CO\N=C(\C)/c1cc(cc(c1)C(=O)N[C@@H](Cc2cc(F)cc(F)c2)[C@H](O)CNCc3cccc(OC)c3)N4CCCCS4(=O)=O	CHEMBL541020	345
C[C@@H](NC[C@@H](O)[C@H](Cc1ccccc1)NC(=O)c2cc(cc(c2)c3ccccc3C(=O)C)C(=O)N[C@H](C)c4ccccc4)c5ccccc5	CHEMBL251970	348
C(CN1CCCCC1)C2CCc3cc(OCc4ccc(cc4)c5ccccc5)ccc3C2	CHEMBL142715	350
CC(=O)N[C@@H](Cc1cc(F)cc(F)c1)[C@H](O)CN[C@]2(CC[C@H](NC(=O)C)NC2)c3cccc(c3)C(C)(C)C	CHEMBL583688	350
CC(=O)N[C@@H](Cc1cc(F)cc(F)c1)[C@H](O)CNC2(CC2)c3cnn(CC(C)(C)C)c3	CHEMBL1258002	350
CC(C)[C@H](O)C(=O)N[C@@H](CO)C(=O)N[C@@H](Cc1ccccc1)[C@@H](O)C[C@@H](C)C(=O)N[C@@H](C(C)C)C(=O)NCc2ccncc2	CHEMBL33724	350
Cc1cccc(CN2C[C@H](CC2=O)C(=O)N[C@@H](Cc3cc(F)cc(F)c3)[C@H](O)[C@H]4C[C@H](CN4)OCc5ccccc5)c1	CHEMBL402307	350
CCCCNC(=O)NCc1ccc(CN2C(=N)NC(CCC3CCCCC3)(CC4CCCCC4)C2=O)cc1	CHEMBL568942	350
CCCN(CC1CC1)c2cc(cc(n2)N(C)S(=O)(=O)C(C)C)C(=O)N[C@H](CO)Cc3cc(F)cc(F)c3	CHEMBL394850	350
COC1=CC2CCC(Cc3ccc(cc3)C(F)(F)F)(C2C=C1)c4cn(C)c(N)n4	CHEMBL566463	350
COc1cc2O[C@@H](CC(=O)c2c(O)c1C)c3ccc(OC)c(c3)c4c(O)cc(O)c5C(=O)C=C(Oc45)c6ccc(O)cc6	CHEMBL1208905	350
CSCC[C@H](NC(=O)[C@@H](O)C(C)C)C(=O)N[C@@H](Cc1ccccc1)[C@@H](O)C[C@@H](C)C(=O)N[C@@H](C(C)C)C(=O)NCc2ccncc2	CHEMBL82352	350
CC(C)c1csc(c1)C2(CCCCC2)NC[C@@H](O)[C@H](Cc3cc(F)cc(F)c3)NC(=O)C	CHEMBL1258353	352
CCc1cn2CCS(=O)(=O)Oc3cc(cc1c23)C(=O)N[C@@H](Cc4ccccc4)[C@@H](O)CNCC#C	CHEMBL558078	360
CCCN(CCC)C(=O)c1cc(CC#N)cc(c1)C(=O)N[C@@H](Cc2ccccc2)[C@H](O)CNCc3cccc(OC)c3	CHEMBL230190	360
O[C@@H]([C@H](Cc1ccccc1)NC(=O)C2=CC(=O)C=C(N2)C(=O)N3COC[C@@H]3c4ccccc4)C(=O)Nc5cccc(c5)c6nn[nH]n6	CHEMBL253865	360
CCNc1cc(N2CCCCS2(=O)=O)c(F)c(c1)C(=O)N[C@@H](Cc3ccccc3)[C@H](O)CNCc4cnn(CC)c4	CHEMBL254485	361
COc1cccc(CNC[C@@H](O)[C@H](Cc2cc(F)cc(F)c2)NC(=O)c3cc(cc(c3)\C(=N/OCC=C)\C)N(C)S(=O)(=O)C)c1	CHEMBL552323	363
CCCCCN1C[C@H]([C@H](CC(C)C)C1=O)C(=O)N[C@@H](Cc2cc(F)cc(F)c2)[C@H](O)[C@H]3C[C@H](CN3)OCc4ccccc4	CHEMBL256679	365
O[C@@H]([C@H](Cc1cc(F)cc(F)c1)NC(=O)[C@@H]2CN(Cc3ccccc3F)C(=O)C2)[C@H]4C[C@H](CN4)OCc5ccccc5	CHEMBL255602	365
CCCN(CCC)C(=O)c1cc(cc(c1)C(=O)N[C@@H](Cc2cc(F)cc(F)c2)[C@@H](O)CNCc3cccc(OC)c3)\C(=N/OCC(C)C)\C	CHEMBL540730	367
CC(=O)N[C@@H](Cc1cc(F)cc(F)c1)[C@H](O)CNC2(CCCCC2)c3cccc(c3)c4cccs4	CHEMBL1209054	370
CCc1cc(C[C@@H]2CS(=O)(=O)C[C@H](NCc3cccc(c3)C(C)C)[C@H]2O)ccc1O	CHEMBL1760858	370
CN1C(=NC(C1=O)(c2cccc(c2)c3cncnc3)c4ccsc4C)N	CHEMBL1824348	370
C\C=C(/C)\c1cccc(c1)C2(CCCCC2)NC[C@@H](O)[C@H](Cc3cc(F)cc(F)c3)NC(=O)C	CHEMBL1208871	380
CC(=O)N[C@@H](Cc1cc(F)cc(F)c1)[C@H](O)CN[C@]2(CC[C@@H](NC2)C#N)c3cccc(c3)C(C)(C)C	CHEMBL572290	380
CC(=O)N[C@@H](Cc1cc(F)cc(F)c1)[C@H](O)CNC2(CCN(CC2)C(=O)N)c3cccc(c3)C(C)(C)C	CHEMBL584936	380
CCOc1cc(cc(c1)C(=O)N[C@@H](Cc2ccccc2)[C@H](O)CNCc3cccc(c3)C(F)(F)F)N4CCCC4=O	CHEMBL398418	380
CN1C(=NC(C2CCCCC2)(C1=O)c3cccc(NC(=O)c4ccc5OCOc5c4)c3)N	CHEMBL605518	380
CC(=O)N[C@@H](Cc1cc(F)cc(F)c1)[C@H](O)CNC2(CC2)c3cccc(c3)C(C)(CF)CF	CHEMBL1270363	390
NC1=NC(C2CCCCC2)(C(=O)N1C[C@@H]3CC[C@H](CC3)C(=O)O)c4ccccc4	CHEMBL589891	390
CC(=O)N[C@@H](Cc1cc(F)cc(F)c1)[C@H](O)CNC2(CCCCC2)c3cn(nn3)C45CC6CC(CC(C6)C4)C5	CHEMBL1257185	392
CCCN(CCC)C(=O)c1cc(cc(c1)S(=O)(=O)c2ccc(OC)cc2)C(=O)N[C@@H](Cc3cc(F)cc(F)c3)[C@@H](O)CNCc4cccc(OC)c4	CHEMBL558542	392
C(CCCNc1c2Cc3ccccc3c2nc4ccccc14)CCCNc5c6Cc7ccccc7c6nc8ccccc58	CHEMBL1819180	400
CC(=O)N[C@@H](Cc1cc(F)cc(F)c1)[C@H](O)CN[C@]2(CC[C@H](NS(=O)(=O)C)NC2)c3cccc(c3)C(C)(C)C	CHEMBL583546	400
CC(=O)N[C@@H](Cc1cc(F)cc(F)c1)[C@H](O)CNC2(CCCN(O)C2)c3cccc(c3)C(C)(C)C	CHEMBL572082	400
CCCN(CCC)C(=O)c1cc(C)cc(c1)C(=O)N[C@@H](Cc2cc(F)cc(F)c2)[C@H](O)[C@H]3CN(CCN3)S(=O)(=O)c4ccncc4	CHEMBL1097334	400
CCCN(CCC)C(=O)c1cccc(c1)C(=O)N[C@@H](Cc2cc(F)cc(F)c2)[C@@H](O)C[C@@H](CC)C(=O)NCCCCC(=O)O	CHEMBL263260	400
CN(c1cc2COC(=O)[C@](C)(N)Cc3cccc(CCCCNc(c2)n1)c3)S(=O)(=O)C	CHEMBL392361	400
CCOC[C@H](N)[C@H](Cc1ccccc1)NC(=O)c2cc(nc(c2)N(C)S(=O)(=O)C(C)C)N(C)C[C@H]3C[C@@H]3C	CHEMBL248245	402
CCCN(CCC)C(=O)c1cccc(c1)C(=O)N[C@@H](Cc2cc(F)cc(F)c2)[C@@H](O)C[C@@H](CC)C(=O)NCCCCCCCC(=O)OC	CHEMBL42447	410
CN(C)c1cccc(c1)C2(CCCCC2)NC[C@@H](O)[C@H](Cc3cc(F)cc(F)c3)NC(=O)C	CHEMBL1208874	410
Nc1cccc(Cn2c(ccc2c3ccccc3Cl)c4ccc(Oc5cccnc5)cc4)n1	CHEMBL1091220	410
Nc1cccc(Cn2c(ccc2c3ccccc3Cl)c4ccc(Oc5cccnn5)cc4)n1	CHEMBL1092912	410
CCCN(CCC)C(=O)c1cc(Oc2ccc(OC)cc2)cc(c1)C(=O)N[C@@H](Cc3cc(F)cc(F)c3)[C@@H](O)CNCc4cccc(OC)c4	CHEMBL539654	412
CC(C)C[C@H](NC(=O)[C@@H](NC(=O)[C@@H](N)CCC(=O)O)C(C)C)C(=O)N[C@@H](Cc1ccccc1)[C@@H](O)C(=O)N[C@@H](CC(=O)O)C(=O)N[C@@H](C)C(=O)N[C@@H](CCC(=O)O)C(=O)N[C@@H](Cc2ccccc2)C(=O)O	CHEMBL406146	413
C[C@@H](NC(=O)c1cc(cc(c1)c2ccccc2C(=O)C)C(=O)N[C@@H](Cc3ccccc3)[C@H](O)CNCC4CC4)c5ccccc5	CHEMBL267053	418
CC(C)[C@H](NC(=O)[C@H](C)C[C@H](O)[C@H](Cc1ccccc1)NC(=O)[C@H](C)NC(=O)[C@H](CCCC(F)(F)F)NC(=O)OC(C)(C)C)C(=O)NCc2ccncc2	CHEMBL309296	419
CCN1C(=O)Nc2c1cc(cc2N3CCCC3=O)C(=O)N[C@@H](Cc4ccccc4)[C@H](O)CNCc5cccc(OC)c5	CHEMBL448939	420
CN(c1cc(CCC2CC2)cc(c1)C(=O)N[C@@H](Cc3ccccc3)[C@H](O)CNC4CC4)S(=O)(=O)C	CHEMBL201155	420
Nc1cccc(Cn2c(ccc2c3ccccc3Cl)c4ccc(OCCCC#N)cc4)n1	CHEMBL1089137	420
COc1cccc(CNC[C@@H](O)[C@H](Cc2cc(F)cc(F)c2)NC(=O)c3cc(cc(c3)\C(=N/O)\C)N(C)S(=O)(=O)C)c1	CHEMBL540731	429
CC(C)(C)c1cccc(CNC[C@@H](O)[C@H](Cc2ccccc2)NC(=O)[C@@H]3CN(Cc4cc(F)cc(F)c4)C(=O)N3)c1	CHEMBL260834	430
CC(C)C[C@H](NC(=O)[C@@H](NC(=O)[C@@H](N)CNC(=O)c1nn[nH]n1)C(C)C)C(=O)NCC(O)(Cc2ccccc2)C(=O)Nc3cccc(c3)C(=O)O	CHEMBL1645504	430
CC(Cc1cc2cc(ccc2nc1N)c3ccccc3C)C(=O)NCc4cncs4	CHEMBL1821823	430
C[C@@H](O)CN\C(=N/C(=O)Cn1c(ccc1C23CC4CC(CC(C4)C2)C3)c5ccccc5)\N	CHEMBL256063	437
CC(C)C[C@H](NC(=O)[C@@H](NC(=O)[C@@H](N)CNC(=O)c1nn[nH]n1)C(C)C)C(=O)NCC(O)C(=O)Nc2cccc(c2)C(=O)O	CHEMBL1645517	440
CCCN(CCC)C(=O)c1cc(C)cc(c1)C(=O)N[C@@H](Cc2cc(F)cc(F)c2)[C@H](O)[C@H]3CN(CCN3)S(=O)(=O)c4cccc(OC)c4	CHEMBL1097326	440
CS(=O)(=O)N(c1ccccc1)c2cccc(c2)C(=O)N[C@@H](Cc3ccccc3)[C@H](O)CNC4CC4	CHEMBL1210433	440
CC(=O)N[C@@H](Cc1cc(F)cc(F)c1)[C@H](O)CNC2(CC2)c3cn(CC(C)(C)C)nn3	CHEMBL1258121	450
CC(C)[C@H](NC(=O)C(O)(CCC(=O)Nc1cc(cc(c1)C(=O)N[C@@H](C)c2ccccc2)N(C)S(=O)(=O)C)CCc3ccccc3)C(=O)NCc4ccccc4	CHEMBL541999	450
CCNc1cc(cc(c1)C(=O)N[C@@H](Cc2cc(F)cc(F)c2)[C@H](O)CNCc3cccc(OC)c3)N4CCCCS4(=O)=O	CHEMBL409766	450
CN(c1cc(cc(c1)C(=O)C2CCCCC2)C(=O)N[C@@H](Cc3ccccc3)[C@H](O)CNC4CC4)S(=O)(=O)C	CHEMBL202057	450
CC(=O)N[C@@H](Cc1cc(F)cc(F)c1)[C@H](O)CNC2(CCCCC2)c3cccc(I)c3	CHEMBL1209892	460
CCC(C)C[C@H](NC(=O)[C@H](CC(C)C)NC(=O)C)[C@@H](O)CC(=O)NC(CCSC)[C@@H](O)CC(=O)N[C@@H](C(C)C)C(=O)NCc1ccc(cc1)C(=O)O	CHEMBL324109	460
Nc1cccc(Cn2c(ccc2c3ccccc3Cl)c4ccc(Oc5cnccn5)cc4)n1	CHEMBL1092000	460
CC(=O)N[C@@H](Cc1cc(F)cc(F)c1)[C@H](O)CNC2(CC2)c3cc(CC(C)(C)C)cs3	CHEMBL1230648	470
CN1C(=NC(C1=O)(c2ccc(OC(F)(F)F)cc2)C34CC5CC(CC(C5)C3)C4)N	CHEMBL583899	470
CN1C(=NC(C1=O)(c2cccc(c2)c3cncnc3)c4cc(C)sc4Cl)N	CHEMBL1824352	470
CO[C@@H](COC(C)C)C[C@H](O)[C@H](COc1cc(F)cc(F)c1)NC(=O)c2cc(cc(c2)C(=O)N[C@H](C)c3ccccc3)N(C)S(=O)(=O)C	CHEMBL572772	480
CCCN(CCC)C(=O)c1cc(C)cc(c1)C(=O)N[C@@H](Cc2cc(F)cc(F)c2)[C@H](O)[C@H]3C[C@H](CCN3)OCCN(C)C	CHEMBL256372	482
CCCCN(CCCC)S(=O)(=O)CCC(=O)N[C@@H](Cc1ccccc1)[C@H](O)CNCc2cccc(OC)c2	CHEMBL253165	484
C[C@H](Cc1cc2cc(ccc2nc1N)c3ccccc3C)C(=O)NCc4cnccn4	CHEMBL1821824	490
CCc1cn2CCCS(=O)(=O)Nc3cc(cc1c23)C(=O)N[C@@H](Cc4ccccc4)[C@H](O)CNC5CC5	CHEMBL561217	490
CCCN(CCC)C(=O)c1cc(C)cc(c1)C(=O)N[C@@H](Cc2cc(F)cc(F)c2)[C@H](O)[C@H]3CNCCN3	CHEMBL1087579	490
CCCC(CCC)S(=O)(=O)C[C@@H](NC(=O)c1ccccc1)C(=O)N[C@@H](Cc2cc(F)cc(F)c2)[C@H](O)CNCc3cccc(CC)c3	CHEMBL234762	495
CC(=O)N[C@@H](Cc1cc(F)cc(F)c1)[C@H](O)CN[C@]2(CC[C@H](Nc3cccnc3)NC2)c4cccc(c4)C(C)(C)C	CHEMBL565550	500
CC[C@H](C)[C@H](NC(=O)[C@H](CCC(=O)O)NC(=O)[C@H](CCC(=O)O)NC(=O)[C@@H](NC(=O)[C@@H](N)CCCCN)[C@@H](C)O)C(=O)N[C@@H](CO)C(=O)N[C@@H](CCC(=O)O)C(=O)N[C@@H](C(C)C)C(=O)N[C@@H](CC(=O)N)C(=O)NC(CC(C)C)[C@@H](O)CC(=O)N[C@@H](C)C(=O)N[C@@H](C)C(=O)N[C@@H](CCC(=O)O)C(=O)N[C@@H](Cc1ccccc1)C(=O)O	CHEMBL411366	500
CCCN(CCC)C(=O)c1cccc(c1)C(=O)N[C@@H](Cc2cc(F)cc(F)c2)[C@H](O)CN[C@H](C)C(=O)NCC(C)C	CHEMBL220813	500
COc1cccc(CNC[C@H](O)[C@H](Cc2cc(F)cc(F)c2)NC(=O)c3cc(cc(c3)\C(=N/OCC=C)\C)C(=O)N[C@@H](C)c4ccccc4)c1	CHEMBL553424	500
CSCC[C@H](NC(=O)[C@@H](NC(=O)C)C(C)C)C(=O)N[C@@H](Cc1ccccc1)C(O)CC(=O)N[C@@H](C(C)C)C(=O)N[C@@H](C)C(=O)N[C@@H](CCC(=O)O)C(=O)N[C@@H](Cc2ccccc2)C(=O)O	CHEMBL89530	500
CCCCNC(=O)[C@H](C)C[C@H](O)[C@@H]1COC\C=C\CSC[C@H](NC(=O)OC(C)(C)C)C(=O)N[C@@H](C)C(=O)N1	CHEMBL377548	510
C[C@@H](NC(=O)c1cc(cc(c1)C(=O)N[C@@H](Cc2ccccc2)[C@H](O)CNC3CCN(Cc4ccccc4)CC3)N(C)S(=O)(=O)C)c5ccccc5	CHEMBL502172	511
CCNc1cc(N2CCCC2=O)c(F)c(c1)C(=O)N[C@@H](Cc3ccccc3)[C@H](O)CNCc4cccc(c4)C(F)(F)F	CHEMBL445734	519
COc1ncccc1c2cccc(c2)C3(N=C(N)N(C)C3=O)c4ccc(OC(F)(F)F)cc4	CHEMBL567259	520
CCC.CC(C)[C@H](NC(=O)C(C)CP(=O)(O)C1CCCCCC[C@H](NC(=O)[C@H](N)CCC(=O)O)C(=O)N[C@@H](CC(=O)O)C(=O)N1)C(=O)N[C@@H](CCC(=O)O)C(=O)N[C@@H](Cc2ccccc2)C(=O)O	CHEMBL539662	522
CCCN(CCC)C(=O)c1cc(C)cc(c1)C(=O)N[C@@H](Cc2cc(F)cc(F)c2)[C@H](O)[C@H]3C[C@@H](Cc4ccccc4)CCN3	CHEMBL255194	522
CCNc1cc(cc(c1)C(=O)N[C@@H](Cc2ccccc2)[C@H](O)CNCc3cccc(c3)C(F)(F)F)N4CCCCS4(=O)=O	CHEMBL401473	529
COc1cccc(CNC[C@H](O)[C@H](Cc2cc(F)cc(F)c2)NC(=O)c3cc(cc(c3)\C(=N/OCC=C)\C)C(=O)NC(C)c4ccc(F)cc4)c1	CHEMBL555518	530
O[C@@H]([C@H](Cc1cc(F)cc(F)c1)NC(=O)C2CN(CC3CC3)C(=O)C2)[C@@H]4NCCN(Cc5ccccc5)C4=O	CHEMBL491659	530
CCCN(CCC)C(=O)c1cc(cc(c1)\C(=N/OCc2ccccc2)\C)C(=O)N[C@@H](Cc3cc(F)cc(F)c3)[C@@H](O)CNCc4cccc(OC)c4	CHEMBL539972	534
N\C(=N\C(=O)Cn1c(ccc1C23CC4CC(CC(C4)C2)C3)c5ccccc5)\NCC(O)CO	CHEMBL401832	536
CCCCCOc1ccc(cc1)c2ccc(c3ccccc3Cl)n2Cc4cccc(N)n4	CHEMBL1093450	550
CCCN(CCC)C(=O)c1cc(C)cc(c1)C(=O)N[C@@H](Cc2cc(F)cc(F)c2)[C@H](O)[C@@H]3NCCN(Cc4ccccc4OC)C3=O	CHEMBL445721	550
CCN1CCN2CCS(=O)(=O)N(C)C3C=C(C=C1C23)C(=O)N[C@@H](Cc4ccccc4)[C@H](O)CNC5CC5	CHEMBL561095	550
CCCOc1ccc(cc1)c2ccc(c3ccccc3Cl)n2CC(=O)\N=C(\N)/NCc4occc4	CHEMBL404341	558
COc1cccc(CNC[C@@H](O)[C@H](Cc2cc(F)cc(F)c2)NC(=O)c3cc(cc(c3)C(=O)C)N(C)S(=O)(=O)C)c1	CHEMBL550753	559
N\C(=N\C(=O)Cn1c(ccc1C23CC4CC(CC(C4)C2)C3)c5ccccc5)\NCCc6cccs6	CHEMBL272765	559
CC(=O)N[C@@H](Cc1cc(F)cc(F)c1)[C@H](O)CNC2(CCCCC2)c3cccc(c3)C4CCOCOC4	CHEMBL1209286	560
CC(Cc1cc2cc(ccc2nc1N)c3ccccc3C)C(=O)NCc4cccnc4	CHEMBL1821822	560
N\C(=N\C(=O)Cn1c(ccc1C23CC4CC(CC(C4)C2)C3)c5ccccc5)\NCCc6ccsc6	CHEMBL404020	565
C[C@@H](NC(=O)c1cc(cc(c1)C(=O)N[C@@H](Cc2ccccc2)[C@H](O)CNCCC3CCN(Cc4ccccc4)CC3)N(C)S(=O)(=O)C)c5ccccc5	CHEMBL510269	567
CCCN(CCC)C(=O)c1cc(C)cc(c1)C(=O)N[C@@H](Cc2cc(F)cc(F)c2)[C@H](O)[C@H]3C[C@H](CCN3)OCC4CCCCC4	CHEMBL402276	567
C[C@H](NC(=O)c1cc(NC(=O)CCC(O)(CCc2ccccc2)C(=O)N[C@H]3[C@H](O)Cc4ccccc34)cc(c1)N(C)S(=O)(=O)C)c5ccccc5	CHEMBL554781	570
C[C@H](NC[C@@H](O)[C@H](Cc1ccccc1)NC(=O)c2cccc(c2)N(c3ccccc3)S(=O)(=O)C)C(=O)NC4CCCCC4	CHEMBL1210329	570
CCNc1cc(cc(c1)C(=O)N[C@@H](Cc2ccccc2)[C@H](O)CNCc3ccccc3)N4CCCCS4(=O)=O	CHEMBL254068	573
CC(=O)N[C@@H](Cc1cc(F)cc(F)c1)[C@H](O)CNC2(CC2)c3cccc(c3)C4CCCO4	CHEMBL1209356	580
O=C(Nc1cc(ccc1N2CCNCC2)c3ccccc3)C4=Cc5ccccc5OC4=O	CHEMBL1164612	580
OC(=O)C(F)(F)F.O=C(Nc1cc(ccc1N2CCNCC2)c3ccccc3)C4=Cc5ccccc5OC4=O	CHEMBL209632	580
CCCOc1ccc(cc1)c2csc(c2CC(=O)NC(=N)N)c3ccccc3Cl	CHEMBL391087	590
Nc1cccc(Cn2c(ccc2c3ccc(cc3)C(=O)NCC=C)c4ccccc4)n1	CHEMBL1092227	590
Nc1cccc(Cn2c(ccc2c3ccccc3Cl)c4ccc(Oc5ccncc5)cc4)n1	CHEMBL1091219	590
CCCC(CCC)S(=O)(=O)CCC(=O)N[C@@H](Cc1ccccc1)[C@H](O)CNCc2cccc(OC)c2	CHEMBL401141	596
CCNc1cc(cc(c1)C(=O)N[C@@H](Cc2ccccc2)[C@H](O)CNCCc3ccccc3)N4CCCC4=O	CHEMBL404501	600
COc1ccc(cc1)c2ccc(c3ccc(Oc4ccc(cc4)C(=O)C)cc3)n2CC(=O)NC(=N)N	CHEMBL254058	600
NC(=N)NC(=O)Cn1c(ccc1c2ccc(cc2)C(F)(F)F)c3ccc(Oc4ccccc4)cc3	CHEMBL399083	600
NC(=N)NC(=O)Cn1c(ccc1c2cccc(c2)C#N)c3ccc(Oc4ccccc4)cc3	CHEMBL398316	600
NC(=NC(=O)Cn1c(ccc1C23CC4CC(CC(C4)C2)C3)c5ccccc5)N	CHEMBL402330	600
CC(=O)N[C@@H](Cc1cc(F)cc(F)c1)[C@H](O)CNC2(CCC2)c3cccc(c3)C(C)(C)C	CHEMBL1270458	610
C[C@@H](NC(=O)c1cc(cc(c1)C(=O)N[C@@H](Cc2ccccc2)[C@H](O)CNCc3ccc4cc[nH]c4c3)N(C)S(=O)(=O)C)c5ccccc5	CHEMBL253929	620
CCCN1CC(N(CC)C1=O)C(=O)N[C@@H](Cc2cc(F)cc(F)c2)[C@H](O)[C@@H]3NCCN(Cc4ccccc4)C3=O	CHEMBL491660	620
CCCOc1ccc(cc1)c2scc(c2CC(=O)N=C(N)N)c3ccccc3Cl	CHEMBL237062	630
CN1C(=NC(C1=O)(c2ccncc2)c3cccc(c3)c4cocc4)N	CHEMBL1090025	630
COc1ccc(cc1C)C2(N=C(N)N(C)C2=O)c3ccc(C#N)c(c3)c4cccnc4	CHEMBL565378	630
OCCN1CCN(CC1)c2ccc(Br)cc2NC(=O)C3=Cc4ccccc4OC3=O	CHEMBL211214	630
CC(=O)N[C@@H](Cc1cc(F)cc(F)c1)[C@H](O)CNC2(CC2)c3cc(ccn3)C(C)(C)C	CHEMBL1257418	640
CCC(C)C[C@H](NC(=O)C[C@H](O)[C@H](Cc1ccccc1)NC(=O)[C@H](CC(C)C)NC(=O)C)[C@@H](O)CC(=O)N[C@@H](C(C)C)C(=O)NCc2ccc(cc2)C(=O)O	CHEMBL309438	650
CCNc1cc(cc(c1)C(=O)N[C@@H](Cc2ccccc2)[C@H](O)CNC3CCSCC3)N4CCCC4=O	CHEMBL252058	650
CCCOc1ccc(cc1)c2ccc(c3ccccc3Cl)n2CC(=O)\N=C(\N)/NCc4ccc(O)c(OC)c4	CHEMBL271440	651
CCC(=O)N(C)C(C)(C)[C@H]1CCC[C@H](C1)C(=O)N[C@@H](Cc2ccccc2)[C@@H](O)CNCc3cccc(c3)C(C)C	CHEMBL1077232	660
Cc1oc(CN\C(=N/C(=O)Cn2c(ccc2C34CC5CC(CC(C5)C3)C4)c6ccccc6)\N)nn1	CHEMBL272766	665
COCC(NC[C@@H](O)[C@@H]1Cc2cccc(OCCCCNc3cc(COC)cc(c3)C(=O)N1)c2)c4cccc(c4)C(C)(C)C	CHEMBL594903	668
Brc1ccc(N2CCNCC2)c(NC(=O)C3=Cc4ccccc4OC3=O)c1	CHEMBL1165089	670
OC(=O)C(F)(F)F.Brc1ccc(N2CCNCC2)c(NC(=O)C3=Cc4ccccc4OC3=O)c1	CHEMBL381919	670
CC(C)[C@H](NC(=O)[C@@H](N)CNC(=O)c1nn[nH]n1)C(=O)N[C@@H](CC2CCCCC2)C(=O)NCC(O)(Cc3ccccc3)C(=O)Nc4cccc(c4)C(=O)O	CHEMBL1645507	680
CCCOc1ccc(cc1)c2scc(c2CC(=O)N=C(N)N)c3ccccc3	CHEMBL236852	680
N\C(=N\C(=O)Cn1c(ccc1C23CC4CC(CC(C4)C2)C3)c5ccccc5)\NCCO	CHEMBL258355	680
C[C@@H](NC(=O)c1cc(COC(=O)C(N)(CO)Cc2ccccc2)cc(c1)N(C)S(=O)(=O)C)c3ccc(F)cc3	CHEMBL1082547	684
CC(C)[C@@H]1CCC(=O)N(CCc2cccc(Oc3ccc4N=C(N)N1Cc4c3)c2)C5CCOCC5	CHEMBL1097058	685
Nc1ncccc1NCc2cc(ccc2OCc3ccccc3)c4ccc5cc[nH]c5c4	CHEMBL220826	690
O=C(CSc1nc2ccc(Nc3nc(nc(n3)N4CCCC4)N5CCCC5)cc2s1)NCc6occc6	CHEMBL1271091	690
CC(=O)N[C@@H](Cc1cc(F)cc(F)c1)[C@H](O)CNC2(CCCCC2)c3cccc(c3)N4CCCOCC4	CHEMBL1209355	700
COC[C@H]1CCCN1C(=O)c2cc(C)cc(c2)C(=O)N[C@@H](Cc3cc(F)cc(F)c3)[C@H](O)[C@@H]4NCN(Cc5ccccc5)C4=O	CHEMBL451950	700
NC(=N)NC(=O)Cn1c(ccc1c2csc3ccccc23)c4ccc(Oc5ccccc5)cc4	CHEMBL254891	700
COCC[C@H](NC(=O)OC(C)(C)C)C(=O)N[C@@H](C)C(=O)N[C@@H](Cc1ccccc1)[C@@H](O)C[C@@H](C)C(=O)N[C@@H](C(C)C)C(=O)NCc2ccncc2	CHEMBL82593	705
CCOc1cc(cc(c1)C(=O)N[C@@H](Cc2ccccc2)[C@H](O)CNCc3cccc(OC(F)(F)F)c3)N4CCCCS4(=O)=O	CHEMBL409752	711
CCOc1cc(cc(c1)C(=O)N[C@@H](Cc2ccccc2)[C@H](O)CNCc3cccc(c3)C(F)(F)F)N4CCCCS4(=O)=O	CHEMBL253867	715
CC(=O)N[C@@H](Cc1cc(F)cc(F)c1)[C@H](O)CNC2(CC2)c3cc(CC(C)(C)C)c[n+]([O-])c3	CHEMBL1257533	720
CC(=O)N[C@@H](Cc1cc(F)cc(F)c1)[C@H](O)CNC2(CCCCC2)c3cccc(c3)S(=O)(=O)C	CHEMBL1208936	720
CSCC[C@H](NC(=O)[C@H](CC(C)C)NC(=O)C)C(=O)N[C@@H](CC(C)C)[C@@H](O)[C@@H]1CC(=O)C[C@H]1C(=O)N[C@@H](C)C(=O)O	CHEMBL187765	720
CCn1cc2CCS(=O)(=O)N(C)c3cc(cc1c23)C(=O)N[C@@H](Cc4ccccc4)[C@@H](O)CNc5ccccc5	CHEMBL560151	739
C[C@@H](NC(=O)c1cc(cc2OCCCc12)C(=O)N[C@@H](Cc3ccccc3)[C@H](O)CNC4CC4)c5ccc(F)cc5	CHEMBL463864	740
NC1=NC(C2=NCCCN12)(c3cccc(c3)c4cccnc4F)c5ccc6OC(F)(F)Oc6c5	CHEMBL566969	740
N\C(=N\C(=O)Cn1c(ccc1C23CC4CC(CC(C4)C2)C3)c5ccccc5)\NCc6cccc(N)c6	CHEMBL257099	744
COc1cc(cc(c1)C(=O)N[C@@H](Cc2ccccc2)[C@H](O)CN[C@@H](C)C(=O)NC3CCCCC3)N4CCCC4=O	CHEMBL258277	745
CC(=O)c1ccc(Oc2ccc(cc2)c3scc(c3CC(=O)N=C(N)N)c4ccccc4Cl)cc1	CHEMBL236851	750
CC(=O)N[C@@H](Cc1cc(F)cc(F)c1)[C@H](O)CNC2(CCCCC2)c3cccc(c3)N4CCCOCC4=O	CHEMBL1209285	750
Oc1ccc(cc1)C2=CC(=O)c3c(O)cc(O)c(c3O2)c4cc(ccc4O)[C@@H]5CC(=O)c6c(O)cc(O)cc6O5	CHEMBL220741	750
CC(C)CNC(=O)[C@H](CCO)NC[C@H](Cc1ccccc1)NC(=O)c2cc(cc(c2)C(=O)N[C@H](C)c3ccc(F)cc3)N(C)S(=O)(=O)C	CHEMBL379781	751
CCCOc1ccc(cc1)c2ccc(c3ccccc3Cl)n2CC(=O)\N=C(\N)/NCc4cccs4	CHEMBL270154	752
CCCN(CCC)C(=O)c1cc(C)cc(c1)C(=O)N[C@@H](Cc2cc(F)cc(F)c2)[C@H](O)[C@H]3CN(Cc4ccccc4Cl)CCN3	CHEMBL476216	755
Brc1ccc(N2CCN(Cc3ccccc3)CC2)c(NC(=O)C4=Cc5ccccc5OC4=O)c1	CHEMBL206442	760
CC(=O)N[C@@H](Cc1cc(F)cc(F)c1)[C@H](O)CNC2(CC2)c3cccc(c3)C4CCOC4	CHEMBL1270164	760
CC(C)c1cccc(CN[C@H]2CS(=O)(=O)C[C@@H](Cc3cccc(Br)c3)[C@@H]2O)c1	CHEMBL1760732	760
CCNc1cc(cc(c1)C(=O)N[C@@H](Cc2ccccc2)[C@H](O)CNCc3ccccc3)N4CCCC4=O	CHEMBL252860	760
CCCNC(=O)c1cc(cc(c1)C(=O)N[C@@H](Cc2ccccc2)[C@H](O)CNCc3cccc(OC)c3)C#N	CHEMBL230314	770
C[C@@]1(N)Cc2cccc(CC[C@@H](NC(=O)c3cc(COC1=O)cc(c3)c4occn4)c5ccccc5)c2	CHEMBL251307	780
CC(=O)N[C@@H](Cc1cc(F)cc(F)c1)[C@H](O)CNC2(CC2)c3cncc(CC(C)(C)C)c3	CHEMBL1257532	780
CCCN(CCC)C(=O)c1cc(C)cc(c1)C(=O)N[C@@H](Cc2cc(F)cc(F)c2)[C@H](O)[C@H]3C[C@H](CN3)OC	CHEMBL255372	780
CCCN1CC(CN(CCC)C1=O)C(=O)N[C@@H](Cc2cc(F)cc(F)c2)[C@H](O)[C@@H]3NCCN(Cc4ccccc4)C3=O	CHEMBL502121	790
CCNc1cc(cc(c1)C(=O)N[C@@H](Cc2ccccc2)[C@H](O)CNC(C)(C)COCC(C)C)N3CCCC3=O	CHEMBL252655	790
NC1=N[C@@](C2=NCCCN12)(c3ccc(OC(F)(F)F)cc3)c4cccc(c4)c5cncnc5	CHEMBL567633	790
CC(=O)c1ccc(Oc2ccc(cc2)c3ccc(c4cccc(c4)C#N)n3CC(=O)NC(=N)N)cc1	CHEMBL400087	800
CC(=O)N[C@@H](Cc1cc(F)cc(F)c1)[C@H](O)CNC2(CCCCC2)c3cccc(c3)C4CCCC4=O	CHEMBL1209167	800
CCCCNC(=O)[C@H](C)C[C@H](O)[C@H](Cc1ccccc1)NC(=O)[C@@H]2CCC[C@@H](C2)[C@@H](NC(=O)C)C(C)C	CHEMBL1092504	800
Nc1cccc(Cn2c(ccc2c3ccccc3Cl)c4ccc(Oc5ccccn5)cc4)n1	CHEMBL1091592	810
C[C@@H](NC(=O)c1cc(cc(c1)c2ccc(Cl)cc2)C(=O)N[C@@H](Cc3ccccc3)[C@H](O)CNC4CC4)c5ccccc5	CHEMBL443447	811
CC(=O)N[C@@H](Cc1cc(F)cc(F)c1)[C@H](O)CNC2(CCCCC2)c3cccc(c3)N4CCCC4=O	CHEMBL1209107	820
COc1cccc(CNC[C@@H](O)[C@H](Cc2cc(F)cc(F)c2)NC(=O)c3cc(cc(c3)\C(=N/OCc4ccccc4)\C)N5CCCCS5(=O)=O)c1	CHEMBL541738	821
CCC[C@H](NC(=O)C)C(=O)N[C@@H](C)C(=O)N[C@@H](CC(C)C)[C@@H](O)CC(=O)N[C@@H](C(C)C)C(=O)NCc1cccc(c1)C(=O)O	CHEMBL136868	830
CCCc1cc(cc(c1)C(=O)N[C@@H](Cc2ccccc2)[C@H](O)CNCc3cccc(c3)C(F)(F)F)N4CCCCS4(=O)=O	CHEMBL264321	844
COC[C@H](N)[C@H](Cc1ccccc1)NC(=O)c2cc(nc(c2)N(C)S(=O)(=O)C(C)C)N(C)C[C@H]3C[C@@H]3C	CHEMBL401008	845
CCCOCCN1C[C@H](CC1=O)C(=O)N[C@@H](Cc2cc(F)cc(F)c2)[C@H](O)[C@H]3C[C@H](CN3)OCc4ccccc4	CHEMBL403850	850
Nc1cccc(Cn2c(ccc2c3ccccc3Cl)c4ccc(Oc5ccccc5)cc4)n1	CHEMBL1091343	850
CC(=O)N[C@@H](Cc1cc(F)cc(F)c1)[C@H](O)CNC2(CCCN(C2)C(=O)OCc3ccccc3)c4cccc(c4)C(C)(C)C	CHEMBL570165	860
CN1C(=NC(C2CCCCC2)(C1=O)c3cccc(NC(=O)c4cccn4C)c3)N	CHEMBL591070	860
CCc1cn2CS(=O)(=O)N(C)c3cc(cc1c23)C(=O)N[C@@H](Cc4ccccc4)[C@H](O)CNC	CHEMBL561838	868
CC(=O)N[C@@H](Cc1cc(F)cc(F)c1)[C@H](O)CNC2(CC2)c3ccn(CC(C)(C)C)n3	CHEMBL1258003	870
CC(C)C[C@H](NC(=O)[C@@H](NC(=O)[C@@H](N)CNC(=O)c1nn[nH]n1)C(C)C)C(=O)NCCC(=O)Nc2cccc(c2)C(=O)O	CHEMBL1645523	870
CCCCOc1ccc(cc1)C2(N=C(N)N(C)C2=O)C34CC5CC(CC(C5)C3)C4	CHEMBL585286	870
C[C@@H](NC(=O)c1cc(cc(c1)C(=O)N[C@@H](Cc2ccccc2)[C@H](O)CNC3CC3)C#C)c4ccccc4	CHEMBL518294	889
CSCC[C@H](NC(=O)[C@H](CC(C)C)NC(=O)C)C(=O)N[C@@H](CC(C)C)[C@@H](O)CC(=O)N[C@@H](C(C)C)C(=O)NCc1cccc(c1)C(=O)O	CHEMBL138002	890
CC(=O)c1ccc(Oc2ccc(cc2)c3ccc(c4ccc(cc4)C(F)(F)F)n3CC(=O)NC(=N)N)cc1	CHEMBL252007	900
CCc1cccc(c1)[C@]2(N=C(N)N(C)C2=O)c3ccc(OC(F)F)cc3	CHEMBL1269919	900
COc1ccc(cn1)c2cccc(c2)C3(N=C(N)N(C)C3=O)c4ccc(OC(F)(F)F)cc4	CHEMBL566212	900
NC(=N)NC(=O)Cn1c(ccc1c2ccc(OCCCC#N)cc2)c3ccccc3	CHEMBL401172	900
CC(C)S(=O)(=O)N(C)c1cc(cc(n1)N(C)C[C@H]2C[C@@H]2C)C(=O)N[C@@H](Cc3cc(F)cc(F)c3)[C@@H](N)CF	CHEMBL230355	910
O[C@H](CNCc1cccc(c1)C(F)(F)F)[C@H](Cc2ccccc2)NC(=O)c3cccc(c3)N4c5ccccc5OS4(=O)=O	CHEMBL1210350	910
CCCN(CCC)C(=O)c1cc(C)cc(c1)C(=O)N[C@@H](Cc2cc(F)cc(F)c2)[C@H](O)[C@@H]3NCCN(CC4CC4)C3=O	CHEMBL507571	915
C[C@@H](NC(=O)c1cc(COCC(N)(Cc2ccccc2)C(F)F)cc(c1)N(C)S(=O)(=O)C)c3ccc(F)cc3	CHEMBL1084135	925
CCNc1cc(cc(c1)C(=O)N[C@@H](Cc2ccccc2)[C@H](O)CNCc3cccc(OC)c3)N4CCCCS4(=O)=O	CHEMBL427719	928
Cc1ccc(cc1N(c2ccccc2)S(=O)(=O)C)C(=O)N[C@@H](Cc3ccccc3)[C@H](O)CNCc4cccc(c4)C(F)(F)F	CHEMBL1210355	930
CCC(CC)NC(=O)c1ccc(cc1)c2scc(c2CC(=O)\N=C(\N)/NCCCO)c3ccccc3Cl	CHEMBL237494	930
CC(=O)N[C@@H](Cc1cc(F)cc(F)c1)[C@H](O)CNC2(CCCCC2)c3cccc(c3)C4CCCC4	CHEMBL1209104	940
O[C@H]1[C@H](Cc2ccc(O)c(Br)c2)CS(=O)(=O)C[C@@H]1NCc3cccc(c3)C4CC4	CHEMBL1614769	950
CCCCN1CC([C@@H](Cc2ccccc2)C1=O)C(=O)N[C@@H](Cc3cc(F)cc(F)c3)[C@H](O)[C@@H]4NCCN(Cc5ccccc5)C4=O	CHEMBL445693	960
CCCN(CCC)C(=O)c1cc(C)cc(c1)C(=O)N[C@@H](Cc2cc(F)cc(F)c2)[C@H](O)[C@H]3CN(Cc4ccccc4C#N)CCN3	CHEMBL455237	970
CC(=O)N[C@@H](Cc1cc(F)cc(F)c1)[C@H](O)CNC2(CC2)c3cccc(c3)n4cccn4	CHEMBL1270163	980
CNC(=O)c1cc(cc(c1)C(=O)N[C@@H](Cc2ccccc2)[C@H](O)CNC3CC3)N(C)S(=O)(=O)C	CHEMBL201961	980
Nc1cccc(Cn2c(ccc2c3ccccc3Cl)c4ccc(Nc5cncnc5)cc4)n1	CHEMBL1093806	980
CC(C)c1cccc(CN[C@H]2CS(=O)(=O)C[C@@H](Cc3ccc(O)c(CCO)c3)[C@@H]2O)c1	CHEMBL1760855	990
CCCc1cc(cc(c1)C(=O)N[C@@H](Cc2ccccc2)[C@H](O)CN[C@@H](C)C(=O)NC3CCCCC3)N4CCCC4=O	CHEMBL257871	990
COc1ccc(cc1)C2=CC(=O)c3c(O)cc(O)c(c3O2)c4cc(ccc4O)C5=CC(=O)c6c(O)cc(O)cc6O5	CHEMBL220745	990
C[C@@H](NC(=O)c1cc(C(=O)N[C@@H](Cc2ccccc2)[C@H](O)CNC3CC3)c4cc(C)oc4c1)c5ccccc5	CHEMBL463865	998
[Cl-].Clc1ccc(NC(=O)c2cccc(NC(=O)C[n+]3ccccc3)c2)cc1	CHEMBL1163225	1000
Brc1ccc(N2CCNCC2)c(NC(=O)c3cccc4ccccc34)c1	CHEMBL378032	1000
C[C@@H](NC(=O)c1cc(cc(c1)C(=O)N[C@@H](Cc2ccccc2)[C@H](O)CNC3CCN(Cc4ccccc4)CC3)N(C)S(=O)(=O)C)c5ccc(F)cc5	CHEMBL502647	1000
C[C@@H](NC(=O)c1cc(cc(c1)C(=O)N[C@@H](Cc2ccccc2)[C@H](O)CNCCC3CCN(Cc4ccccc4)CC3)N(C)S(=O)(=O)C)c5ccc(F)cc5	CHEMBL498966	1000
C[C@@H](NC(=O)c1cc(cc(c1)C(=O)N[C@@H](Cc2ccccc2)C(O)C(=O)NC3CCN(Cc4ccccc4)CC3)N(C)S(=O)(=O)C)c5ccc(F)cc5	CHEMBL501507	1000
C[C@@H](NC(=O)c1cc(cc(c1)C(=O)N[C@@H](Cc2ccccc2)C(O)C(=O)NC3CCN(Cc4ccccc4)CC3)N(C)S(=O)(=O)C)c5ccccc5	CHEMBL504664	1000
C[C@@H](NC(=O)c1cc(cc(c1)C(=O)N[C@@H](Cc2ccccc2)C(O)C(=O)NCC3CCN(Cc4ccccc4)CC3)N(C)S(=O)(=O)C)c5ccc(F)cc5	CHEMBL507252	1000
C[C@@H](NC(=O)c1cc(cc(c1)C(=O)N[C@@H](Cc2ccccc2)C(O)C(=O)NCC3CCN(Cc4ccccc4)CC3)N(C)S(=O)(=O)C)c5ccccc5	CHEMBL499502	1000
C[C@@H](NC(=O)c1cc(cc(c1)C(=O)N[C@@H](Cc2ccccc2)C(O)C(=O)NCCC3CCN(Cc4ccccc4)CC3)N(C)S(=O)(=O)C)c5ccc(F)cc5	CHEMBL501509	1000
C[C@@H](NC(=O)c1cc(cc(c1)C(=O)N[C@@H](Cc2ccccc2)C(O)C(=O)NCCC3CCN(Cc4ccccc4)CC3)N(C)S(=O)(=O)C)c5ccccc5	CHEMBL450138	1000
C[C@@H](NC(=O)c1cc(cc(c1)C(=O)N[C@H](CO)Cc2ccccc2)N(C)S(=O)(=O)C)c3ccc(F)cc3	CHEMBL380257	1000
C[C@@H](NC(=O)c1cccc(c1)C(=O)N[C@@H](Cc2ccccc2)[C@H](O)CNCCC3CCN(Cc4ccccc4)CC3)c5ccc(F)cc5	CHEMBL455081	1000
C[C@@H](NC(=O)c1cccc(c1)C(=O)N[C@@H](Cc2ccccc2)[C@H](O)CNCCC3CCN(Cc4ccccc4)CC3)c5ccccc5	CHEMBL456748	1000
CC(=O)N[C@@H](Cc1cc(F)cc(F)c1)[C@H](O)CNC2(CCCCC2)c3cccc(c3)N4CCCNC4=O	CHEMBL1209284	1000
CC(C)(C)OC(=O)N1CCN(CC1)c2ccc(Br)cc2NC(=O)C3=Cc4ccccc4OC3=O	CHEMBL207083	1000
CC(C)[C@H](NC(=O)[C@H](C)C[C@H](O)[C@H](COCc1ccccc1)NC(=O)c2cc(cc(c2)C(=O)N[C@H](C)c3ccccc3)N(C)S(=O)(=O)C)C(=O)NCc4ccccc4	CHEMBL1076901	1000
CC(C)C[C@H](NC(=O)c1cc(cc(c1)C(=O)N[C@H](C)c2ccc(F)cc2)N(C)S(=O)(=O)C)[C@@H](O)C[C@@H](C)C(=O)NCC3CCN(Cc4ccccc4)CC3	CHEMBL509294	1000
CC(C)C[C@H](NC(=O)c1cc(cc(c1)C(=O)N[C@H](C)c2ccc(F)cc2)N(C)S(=O)(=O)C)[C@@H](O)C[C@@H](C)C(=O)NN3CCN(Cc4ccccc4)CC3	CHEMBL449152	1000
CC(C)C[C@H](NC(=O)c1cc(cc(c1)C(=O)N[C@H](C)c2ccccc2)N(C)S(=O)(=O)C)[C@@H](O)C[C@@H](C)C(=O)NN3CCN(Cc4ccccc4)CC3	CHEMBL503126	1000
CCCN(CCC)C(=O)c1cc(cc(c1)[N+](=O)[O-])C(=O)N[C@@H](Cc2ccccc2)[C@H](O)CNCCC3CCN(Cc4ccccc4)CC3	CHEMBL455352	1000
CCCN(CCC)C(=O)c1cc(cc(c1)[N+](=O)[O-])C(=O)N[C@@H](Cc2ccccc2)C(O)C(=O)NC3CCN(Cc4ccccc4)CC3	CHEMBL505749	1000
CCCN(CCC)C(=O)c1cc(cc(c1)[N+](=O)[O-])C(=O)N[C@@H](Cc2ccccc2)C(O)C(=O)NCC3CCN(Cc4ccccc4)CC3	CHEMBL505994	1000
CCCN(CCC)C(=O)c1cc(cc(c1)[N+](=O)[O-])C(=O)N[C@@H](Cc2ccccc2)C(O)C(=O)NCCC3CCN(Cc4ccccc4)CC3	CHEMBL448678	1000
CCCN(CCC)C(=O)c1cccc(c1)C(=O)N[C@@H](Cc2ccccc2)[C@H](O)CNCCC3CCN(Cc4ccccc4)CC3	CHEMBL446478	1000
Clc1ccc2c(NCCCCCCCNc3c4Cc5ccccc5c4nc6ccccc36)c7CCCCc7nc2c1	CHEMBL1819176	1000
COc1cccc2C=C(C(=O)Nc3cc(Br)ccc3N4CCN(CCO)CC4)C(=O)Oc12	CHEMBL209052	1000
CSCC[C@H](NC(=O)[C@@H](NC(=O)C)C(C)C)C(=O)NC(CC(C)C)C(O)CC(=O)N[C@@H](C(C)C)C(=O)N[C@@H](C)C(=O)N[C@@H](CCC(=O)O)C(=O)O	CHEMBL327386	1000
OC(=O)C(F)(F)F.Brc1ccc(N2CCNCC2)c(NC(=O)c3cccc4ccccc34)c1	CHEMBL203120	1000
NC1=NC(C2CCCCC2)(C(=O)N1CC3CCCO3)c4ccccc4	CHEMBL592534	1040
CN1C(=NC(C2CCCCC2)(C3CCCCC3)C1=O)N	CHEMBL589163	1080
NC1=NC(C2CCCCC2)(C(=O)N1Cc3cc(F)cc(F)c3)c4ccccc4	CHEMBL592533	1080
CCCN(CCC)S(=O)(=O)CCC(=O)N[C@@H](Cc1ccccc1)[C@H](O)CNCc2cccc(OC)c2	CHEMBL252961	1090
CC(=O)N[C@@H](Cc1cc(F)cc(F)c1)[C@H](O)CNC2(CCCCC2)c3cccc(c3)c4occc4	CHEMBL1208997	1100
CC(C)c1cccc(CN[C@H]2CS(=O)(=O)C[C@@H](Cc3ccccc3)[C@@H]2O)c1	CHEMBL1760731	1100
CC(C)NC[C@@H](O)[C@H](Cc1ccccc1)NC(=O)c2cc(cc(c2)C(=O)N[C@H](C)c3ccccc3)N(C)S(=O)(=O)C	CHEMBL253103	1100
CC[C@H](NCC1Cc2cccc(CCCCCc3cc(cc(c3)C(=O)N1)N(C)S(=O)(=O)C)c2)C(=O)NCC(C)C	CHEMBL214963	1100
CCCN(c1cc2COC[C@](C)(N)Cc3cccc(CC[C@@H](NC(=O)c(c2)c1)C4CC4)c3)S(=O)(=O)C	CHEMBL398839	1100
CCCN(CCC)C(=O)c1cc(C)cc(c1)C(=O)N[C@@H](Cc2cc(F)cc(F)c2)[C@H](O)[C@@H]3NCN(Cc4ccccc4)C3=O	CHEMBL507651	1100
CCCOCc1cccc(C[C@@H]2CS(=O)(=O)C[C@H](NCc3cccc(c3)C(C)C)[C@H]2O)c1	CHEMBL1760734	1100
CN(c1cc(cc(NCC2CC2)n1)C(=O)N[C@H](CO)Cc3cc(F)cc(F)c3)S(=O)(=O)C	CHEMBL230349	1100
COc1ccc(cc1)C(Cc2cc(ccc2OC)[N+](=O)[O-])c3csc(N)n3	CHEMBL466025	1100
NC(=N)NC(=O)Cn1c(ccc1c2ccccc2Cl)c3ccc(Oc4ccccc4)cc3	CHEMBL398315	1100
C[C@@H](NC(=O)c1cc(cc(c1)C(=O)N[C@@H](Cc2ccccc2)[C@H](O)CNC3CC3)C#Cc4ccccc4)c5ccccc5	CHEMBL450801	1119
CCCCNC(=O)[C@H](C)C[C@H](O)[C@@H]1COC\C=C\CSC[C@H](NC(=O)C)C(=O)N[C@@H](C)C(=O)N1	CHEMBL212102	1120
CCNc1cc(cc(c1)C(=O)N[C@@H](Cc2ccccc2)[C@H](O)CNC3CCCCCC3)N4CCCC4=O	CHEMBL430400	1120
CC(C)[C@H](F)C(=O)N[C@@H](C)C(=O)N[C@@H](Cc1ccccc1)[C@@H](O)C[C@@H](C)C(=O)N[C@@H](C(C)C)C(=O)NCc2ccncc2	CHEMBL82270	1130
COc1ccc2C(=CC(=O)Oc2c1)CC(=O)Nc3cc(Br)ccc3N4CCN(CC4)S(=O)(=O)c5cccs5	CHEMBL205637	1130
CC[C@H](NCC1Cc2cccc(CCCCc3cc(cc(c3)C(=O)N1)N(C)S(=O)(=O)C)c2)C(=O)NCC(C)C	CHEMBL217374	1139
CCCN(CCC)C(=O)c1cc(C)cc(c1)C(=O)N[C@@H](Cc2cc(F)cc(F)c2)[C@H](O)[C@H]3CN(CCN3)C(=O)c4ccccc4	CHEMBL1097318	1150
CCCOc1ccc(cc1)c2ccc(c3ccccc3Cl)n2Cc4cccc(N)n4	CHEMBL1089788	1150
CC(C)Oc1cc(cc(c1)C(=O)N[C@@H](Cc2ccccc2)[C@H](O)CN[C@@H](C)C(=O)NC3CCCCC3)N4CCCC4=O	CHEMBL255977	1180
CCNc1cc(cc2N(C)S(=O)(=O)CCCc12)C(=O)N[C@@H](Cc3ccccc3)[C@H](O)CNC4CCOCC4	CHEMBL564712	1185
[Na+].[Na+].[Na+].CC(C)C(\C=C/[C@@H](C)[C@H]1CC[C@H]2[C@@H]3C[C@H](OS(=O)(=O)[O-])[C@H]4C[C@H](OS(=O)(=O)[O-])[C@H](C[C@]4(C)[C@H]3CC[C@]12C)OS(=O)(=O)[O-])C(C)C	CHEMBL1224769	1200
CC(=O)c1ccc(Oc2ccc(cc2)c3ccc(c4cccc(F)c4)n3CC(=O)NC(=N)N)cc1	CHEMBL253241	1200
CC(C)c1cccc(CN[C@H]2CS(=O)(=O)C[C@@H](Cc3ccc(O)c(CO)c3)[C@@H]2O)c1	CHEMBL1760854	1200
CSCC[C@H](NC(=O)[C@@H](NC(=O)C)C(C)C)C(=O)NC(CC(C)C)C(O)CC(=O)N[C@@H](C(C)C)C(=O)N[C@@H](C)C(=O)N[C@@H](CCC(=O)O)C(=O)N[C@@H](C)C(=O)O	CHEMBL264484	1200
NC(=N)NC(=O)Cn1c(ccc1c2ccc(NC(=O)c3ccc(Cl)cc3Cl)cc2)c4ccccc4	CHEMBL251993	1200
Nc1cccc(Cn2c(ccc2c3ccc(cc3)C(=O)NC4CC4)c5ccccc5)n1	CHEMBL1093120	1200
O[C@@H]([C@H](Cc1cc(F)cc(F)c1)NC(=O)[C@@H]2CN(Cc3nccs3)C(=O)C2)[C@H]4C[C@H](CN4)OCc5ccccc5	CHEMBL430039	1200
COc1cccc(CNC[C@@H](O)[C@H](Cc2cc(F)cc(F)c2)NC(=O)c3cc(cc(c3)\C(=N/OCC=C)\C)N4CCCCS4(=O)=O)c1	CHEMBL552744	1232
CN1C(=N[C@@](C1=O)(c2ccccc2)c3ccc(OCCF)cc3)N	CHEMBL1269918	1240
NC1=NC(C2CCCCC2)(C(=O)N1Cc3ccccc3)c4ccccc4	CHEMBL585215	1240
O=C(Nc1cc(ccc1N2CCN(Cc3ccccc3)CC2)c4ccccc4)c5cccc6ccccc56	CHEMBL379334	1250
C[C@@H](NC(=O)c1cc(cc(c1)c2cn(Cc3ccccc3)nn2)C(=O)N[C@@H](Cc4ccccc4)[C@H](O)CNC5CC5)c6ccccc6	CHEMBL449578	1256
CNC(=O)c1cc(cc(c1)C(=O)N[C@@H](COCc2cc(F)cc(F)c2)[C@@H](O)C[C@@H](C)C(=O)N[C@@H](C(C)C)C(=O)NCc3ccccc3)N(C)S(=O)(=O)C	CHEMBL1076908	1260
CN(C)c1cccc(CNC[C@@H](O)[C@H](Cc2cc(F)cc(F)c2)NC(=O)[C@@H]3CN(Cc4ccccc4)C(=O)N3)c1	CHEMBL405889	1290
C[C@H](NC[C@@H](O)[C@H](Cc1ccccc1)NC(=O)c2cccc(c2)N(C(=O)C)c3ccccc3)C(=O)NC4CCCCC4	CHEMBL1210331	1300
CC(=O)c1ccc(Oc2ccc(cc2)c3ccc(c4ccc(F)cc4)n3CC(=O)NC(=N)N)cc1	CHEMBL252026	1300
CC(=O)N[C@@H](Cc1cc(F)cc(F)c1)[C@H](O)CNC2(CC2)c3cccc(c3)C(=C)C(F)(F)F	CHEMBL1270262	1300
CC(=O)N[C@@H](Cc1cc(F)cc(F)c1)[C@H](O)CNC2(CCCCC2)c3cccc(c3)N4CCOC4=O	CHEMBL1209165	1300
CC(=O)N[C@@H](Cc1cc(F)cc(F)c1)[C@H](O)CNC2(CCCCC2)c3cccc(c3)N4CCOCC4=O	CHEMBL1209223	1300
CC(=O)N[C@@H](Cc1cc(F)cc(F)c1)[C@H](O)CNC2(CCCN(C2)C(=O)C)c3cccc(c3)C(C)(C)C	CHEMBL584121	1300
CC(=O)N[C@@H](Cc1cc(F)cc(F)c1)[C@H](O)CNCc2cccc(c2)C(C)(C)C	CHEMBL1269948	1300
CC(C)[C@H](NC(=O)C[C@H](O)[C@H](CC1CCCCC1)NC(=O)C[C@H](O)[C@H](Cc2ccccc2)NC(=O)[C@@H]3CCCN3)C(=O)NCc4ccc(cc4)C(=O)O	CHEMBL114169	1300
CCCN(CCC)C(=O)c1cc(C)cc(c1)C(=O)N[C@@H](Cc2cc(F)cc(F)c2)[C@H](O)[C@H]3CN(CCN3)S(=O)(=O)c4ccc(C)cc4	CHEMBL1097322	1300
CCCN(CCC)C(=O)c1cc(C)cc(c1)C(=O)N[C@@H](Cc2cc(F)cc(F)c2)[C@H](O)[C@H]3CN(CCN3)S(=O)(=O)c4ccc(OC)c(OC)c4	CHEMBL1097330	1300
CN(c1cc(cc(c1)C(=C)c2ccccc2)C(=O)N[C@@H](Cc3ccccc3)[C@H](O)CNC4CC4)S(=O)(=O)C	CHEMBL201049	1300
COc1cccc(c1)c2ccc(c3ccc(Oc4ccc(cc4)C(=O)C)cc3)n2CC(=O)NC(=N)N	CHEMBL254092	1300
COc1ccccc1c2ccc(c3ccc(Oc4ccccc4)cc3)n2CC(=O)NC(=N)N	CHEMBL252218	1300
NC(=N)NC(=O)Cn1c(ccc1c2ccc(Oc3ccccc3)cc2)c4ccccc4	CHEMBL253863	1300
NC(=N)NC(=O)Cn1c(ccc1c2cccc(Cl)c2)c3ccc(Oc4ccccc4)cc3	CHEMBL253449	1300
CCNc1cc(cc(c1)C(=O)N[C@@H](Cc2ccccc2)[C@H](O)CNC3CC3)N4CCCCS4(=O)=O.OC=O	CHEMBL493637	1324
CC(C)C[C@H](NC(=O)c1cc(cc(c1)C(=O)N[C@H](C)c2ccc(F)cc2)N(C)S(=O)(=O)C)[C@@H](O)C[C@@H](C)C(=O)NCCC3CCN(Cc4ccccc4)CC3	CHEMBL454559	1339
CCCCN1CC(CC1=O)C(=O)N[C@@H](Cc2cc(F)cc(F)c2)[C@H](O)[C@H]3CN(CCN3)S(=O)(=O)c4cccc(C)c4	CHEMBL1097347	1350
CCCN(CCC)C(=O)c1cc(C)cc(c1)C(=O)N[C@@H](Cc2cc(F)cc(F)c2)[C@H](O)[C@H]3C[C@@H](Cc4ccccc4OC)CCN3	CHEMBL257735	1350
CCNc1cc(cc(c1)C(=O)N[C@@H](Cc2ccccc2)[C@H](O)CNCc3ccccc3OC)N4CCCC4=O	CHEMBL429668	1350
CN1C(=NC(C1=O)(c2ccc(OC(F)(F)F)cc2)c3cccc(c3F)c4cncnc4)N	CHEMBL566404	1360
COc1cccc(c1)C(=O)Nc2cccc(c2)C3(N=C(N)N(C)C3=O)C4CCCCC4	CHEMBL594896	1360
C[C@@H](NC(=O)c1cc(COC[C@](N)(CO)Cc2ccccc2)cc(c1)N(C)S(=O)(=O)C)c3ccc(F)cc3	CHEMBL1086788	1370
CCCCCCN1C(=NC(C2CCCCC2)(C1=O)c3ccccc3)N	CHEMBL593979	1390
CN1C(=N[C@@](C1=O)(c2ccc(OC(F)(F)F)cc2)c3ccc(F)c(c3)c4cncnc4)N	CHEMBL566632	1390
C[C@@H](NC(=O)c1cc(cc(c1)c2ccccc2C(=O)C)C(=O)N[C@@H](Cc3ccccc3)[C@H](O)CNC4CCC4)c5ccccc5	CHEMBL254633	1400
C[C@@H](NC(=O)c1cc(OCC(=O)NCCCCCN)cc(OS(=O)(=O)Cc2ccccc2)c1)c3ccc(F)cc3	CHEMBL426717	1400
CC(=O)N[C@@H](Cc1cc(F)cc(F)c1)[C@H](O)CNC2(CCCCC2)c3cccc(c3)N4CCNC4=O	CHEMBL1209166	1400
CC[C@H](C)[C@H](NC(=O)[C@H](Cc1ccccc1)NC(=O)C)C(=O)NC(CC(C)C)C(O)CC(=O)N[C@@H](CC(C)C)C(=O)N	CHEMBL277046	1400
CCCCNC(=O)[C@H](C)C[C@H](O)[C@H](CC(C)C)NC(=O)[C@H](CCSC)NC(=O)CCC(C)C	CHEMBL461606	1400
CCCN(CCC)C(=O)c1cccc(c1)C(=O)N[C@@H](Cc2cc(F)cc(F)c2)[C@@H](O)C[C@@H](CC)C(=O)NCc3ccccc3	CHEMBL43962	1400
CN(c1cc(cc(c1)C(=O)N[C@@H](Cc2ccccc2)[C@H](O)CNC3CC3)C(=O)Cc4ccccc4)S(=O)(=O)C	CHEMBL202549	1400
COc1cc(O)c2C(=O)C=C(Oc2c1)c3ccc(O)c(c3)c4c(O)cc(O)c5C(=O)C=C(Oc45)c6ccc(O)cc6	CHEMBL255493	1400
NC(=N)NC(=O)Cn1c(ccc1c2ccc(NC(=O)c3ccc(Br)cc3)cc2)c4ccccc4	CHEMBL252191	1400
NC(=N)NC(=O)Cn1c(ccc1c2ccc(Oc3ccccc3)cc2)c4ccc(F)cc4	CHEMBL252025	1400
NC(=N)NC(=O)Cn1c(ccc1c2cccc(F)c2)c3ccc(Oc4ccccc4)cc3	CHEMBL253031	1400
O[C@@H]([C@H](Cc1cc(F)cc(F)c1)NC(=O)C2CN(Cc3ccccc3)C(=O)C2)[C@@H]4NCCN(Cc5ccccc5)C4=O	CHEMBL442847	1400
CCCc1cccc(c1)C2(N=C(N)N3CCCN=C23)c4ccc(OC(F)(F)F)cc4	CHEMBL583887	1430
CCCN(CCC)C(=O)c1cc(C)cc(c1)C(=O)N[C@@H](Cc2cc(F)cc(F)c2)[C@H](O)[C@H]3C[C@@H](O)CN3	CHEMBL404680	1450
CCOc1cc(cc(c1)C(=O)N[C@@H](Cc2ccccc2)[C@H](O)CN[C@@H](C)C(=O)NC3CCCCC3)N4CCCC4	CHEMBL403533	1450
COc1ccc2cc(ccc2c1)c3cn(C[C@@H]4Cc5c(CN4)[nH]c6ccccc56)nn3	CHEMBL1272322	1490
CC(C)c1cccc(CN[C@H]2CS(=O)(=O)C[C@@H](Cc3ccc(O)c(Br)c3)[C@@H]2O)c1	CHEMBL1760859	1500
CCc1cn2CCS(=O)(=O)N(C)c3ccc(C(=O)N[C@@H](COc4cc(F)cc(F)c4)[C@@H](O)C[C@H](COCc5ccc(OC)cc5)OC)c1c23	CHEMBL583304	1500
CCCN(CCC)C(=O)c1cc(C)cc(c1)C(=O)N[C@@H](Cc2cc(F)cc(F)c2)[C@H](O)[C@H]3CN(CCN3)S(=O)(=O)c4ccc(Cl)c(Cl)c4	CHEMBL1097329	1500
CO[C@@H](CNc1ccc(F)cc1)C[C@H](O)[C@H](COc2cc(F)cc(F)c2)NC(=O)c3cc(cc(c3)C(=O)N[C@H](C)c4ccccc4)N(C)S(=O)(=O)C	CHEMBL583703	1500
CO[C@@H](CNc1ccccc1)C[C@H](O)[C@H](COc2cc(F)cc(F)c2)NC(=O)c3cc(cc(c3)C(=O)N[C@H](C)c4ccccc4)N(C)S(=O)(=O)C	CHEMBL583699	1500
COc1cccc(c1)c2ccc(c3ccc(Oc4ccccc4)cc3)n2CC(=O)NC(=N)N	CHEMBL254091	1500
COCCN1CC(CC1=O)C(=O)N[C@@H](Cc2cc(F)cc(F)c2)[C@H](O)[C@@H]3NCCN(Cc4ccccc4)C3=O	CHEMBL521794	1500
CC(C)C[C@H](NC(=O)c1cc(cc(c1)C(=O)N[C@H](C)c2ccc(F)cc2)N(C)S(=O)(=O)C)[C@@H](O)C[C@@H](C)C(=O)NC3CCN(Cc4ccccc4)CC3	CHEMBL502753	1504
CN1C(=NC(C1=O)(c2ccccc2)C34CC5CC(CC(C5)C3)C4)N	CHEMBL585952	1530
CCCOc1ccc(cc1C)c2scc(c2CC(=O)\N=C(\N)/NCCCO)c3ccccc3Cl	CHEMBL237282	1540
Oc1ccc(cc1)C2=CC(=O)c3c(O)cc(O)c(c3O2)c4cc(ccc4O)C5=CC(=O)c6c(O)cc(O)cc6O5	CHEMBL63354	1540
CC(C)C[C@H](NC(=O)c1cc(cc(c1)C(=O)N[C@H](C)c2ccccc2)N(C)S(=O)(=O)C)[C@@H](O)C[C@@H](C)C(=O)NC3CCN(Cc4ccccc4)CC3	CHEMBL503136	1541
CCCOc1ccc(c(C)c1)c2scc(c2CC(=O)\N=C(\N)/NCCCO)c3ccccc3Cl	CHEMBL391108	1550
CCNC1=CC(=CC2C1CCCS(=O)(=O)N2C)C(=O)N[C@@H](Cc3ccccc3)[C@H](O)CNC4CC4	CHEMBL561096	1574
CC(=O)N[C@@H](Cc1cc(F)cc(F)c1)[C@H](O)CNC2(CCCCC2)c3oc(cn3)C(C)(C)C	CHEMBL1258802	1580
C[C@@H](NC(=O)c1cc(O)cc(c1)C(=O)N[C@@H](Cc2ccccc2)[C@H](O)CNC3CC3)c4ccccc4	CHEMBL482371	1581
CC(=O)N[C@@H](Cc1cc(F)cc(F)c1)[C@H](O)CNC2(CCCCC2)c3cccc(c3)n4ccnc4	CHEMBL1209056	1600
CCOc1ccc(cc1)c2ccc(c3ccccc3)n2CC(=O)NC(=N)N	CHEMBL253214	1600
CNC(=O)c1cc(cc(c1)C(=O)N[C@H](COCc2cc(F)cc(F)c2)[C@@H](O)CC(=O)N[C@@H](C(C)C)C(=O)Nc3cc(cc(c3)C(=O)O)C(=O)O)N(C)S(=O)(=O)C	CHEMBL450469	1600
COc1ccccc1c2ccc(c3ccc(Oc4ccc(cc4)C(=O)C)cc3)n2CC(=O)NC(=N)N	CHEMBL252219	1600
OC(=O)C(F)(F)F.Brc1ccc(N2CCNCC2)c(NC(=O)C3=CC(=O)c4ccccc4O3)c1	CHEMBL381272	1600
CC(=O)N[C@@H](Cc1cc(F)cc(F)c1)[C@H](O)CNC2(CC2)c3ccc(CC(C)(C)C)s3	CHEMBL1257651	1620
CCCCOc1ccc(cc1)c2ccc(c3ccccc3Cl)n2Cc4cccc(N)n4	CHEMBL1090119	1650
CCCOc1cc(cc(c1)C(=O)N[C@@H](Cc2ccccc2)[C@H](O)CN[C@@H](C)C(=O)NC3CCCCC3)N4CCCC4=O	CHEMBL272714	1690
CC(=O)N[C@@H](Cc1cc(F)cc(F)c1)[C@H](O)CNC2(CC2)c3cccc(c3)C4CCCCO4	CHEMBL1209358	1700
CC(C)(C)OC(=O)N1CCN(CC1)c2ccc(Br)cc2NC(=O)c3ccc4ccccc4n3	CHEMBL206651	1700
CC(C)(C)OC(=O)N1CCN(CC1)c2ccc(Br)cc2NC(=O)c3cccc4ccccc34	CHEMBL381618	1700
CC(Cc1cc2cc(ccc2nc1N)c3ncccc3C#N)C(=O)NCCC(C)(C)C	CHEMBL1821829	1700
CC1CCc2cccc(C[C@@](C)(N)C(=O)OCc3cc(CC1)cc(c3)N(C)S(=O)(=O)C)c2	CHEMBL394225	1700
CCCN(CCC)C(=O)c1cc(C)cc(c1)C(=O)N[C@@H](Cc2cc(F)cc(F)c2)[C@H](O)[C@H]3CN(CCN3)S(=O)(=O)c4ccc(Cl)cc4	CHEMBL1097325	1700
CCNc1cc(cc(c1)C(=O)N[C@@H](Cc2ccccc2)[C@H](O)CNc3ccccc3)N4CCCC4=O	CHEMBL252861	1700
CN1C(=O)CC(C)(CCc2cccc(c2)c3ccccc3)N=C1N	CHEMBL239640	1700
COc1ccc2C(=CC(=O)Oc2c1)CC(=O)Nc3cc(Br)ccc3N4CCNCC4.OC(=O)C(F)(F)F	CHEMBL205241	1700
NC(=N)NC(=O)Cn1c(ccc1c2ccc(OCC=C)cc2)c3ccccc3	CHEMBL401171	1700
O=C(CSc1nc2ccc(Nc3nc(nc(n3)N4CCCC4)N5CCCC5)cc2s1)NCc6ccccc6	CHEMBL1270780	1700
N\C(=N\C(=O)Cn1c(ccc1C23CC4CC(CC(C4)C2)C3)c5ccccc5)\NCCCn6ccnc6	CHEMBL256823	1710
CC(C)CC(=O)N[C@@H](C)C(=O)N[C@@H](Cc1ccccc1)[C@@H](O)C[C@@H](C)C(=O)N[C@@H](C(C)C)C(=O)NCc2ccncc2	CHEMBL84835	1740
CCOC(=O)CSc1nc2ccc(Nc3nc(nc(n3)N4CCCC4)N5CCCC5)cc2s1	CHEMBL1270883	1770
C[C@@H](NC(=O)c1cc(cc(c1)C(=O)N[C@@H](Cc2ccccc2)[C@H](O)CNC3CC3)N4CCCS4(=O)=O)c5ccccc5	CHEMBL443087	1774
CC(C)NC(=O)c1ccc(cc1)c2ccc(c3ccccc3)n2Cc4cccc(N)n4	CHEMBL1092228	1780
CC(C)c1cccc(CN[C@H]2CS(=O)(=O)C[C@@H](Cc3ccc(O)cc3)[C@@H]2O)c1	CHEMBL1760729	1800
CC1CCc2cccc(C[C@@](C)(N)C(=O)OCc3cc(CC1)nc(c3)N(C)S(=O)(=O)C)c2	CHEMBL235853	1800
CCCCCS(=O)(=O)c1cccc(c1)C(=O)N[C@@H](Cc2ccccc2)[C@H](O)CN[C@@H](C)C(=O)NC3CCCCC3	CHEMBL402305	1800
CCCCOc1ccc(cc1)c2ccc(c3ccccc3)n2CC(=O)NC(=N)N	CHEMBL253420	1800
CCCN(CCC)C(=O)c1cc(C)cc(c1)C(=O)N[C@@H](Cc2cc(F)cc(F)c2)[C@H](O)[C@H]3CN(CCN3)S(=O)(=O)CCC	CHEMBL1097341	1800
CO[C@@H](COCc1ccc(OC)cc1)C[C@H](O)[C@H](COc2cc(F)cc(F)c2)NC(=O)c3cc(nc(c3)N(C)S(=O)(=O)C)N(C)C[C@H]4C[C@@H]4C	CHEMBL583303	1800
COc1ccc(cc1)C(Cc2cc(ccc2OC)[N+](=O)[O-])c3cn(C)c(N)n3	CHEMBL494186	1800
COc1ccc(cc1)C(Cc2ccc(cc2)C(F)(F)F)c3cn(C)c(N)n3	CHEMBL567718	1800
COc1cccc(c1)C(=O)Nc2ccc(cc2)c3ccc(c4ccccc4)n3CC(=O)NC(=N)N	CHEMBL252190	1800
Oc1cc(O)c2C[C@H](OC(=O)c3cc(O)c(O)c(O)c3)[C@H](Oc2c1)c4cc(O)c(O)c(O)c4	CHEMBL126079	1800
Cl.Clc1ccc2c(NCCCCCCCCNC(=O)CCc3ccc4nc(c5CCCOc5c4c3)c6ccccc6)c7CCCCc7nc2c1	CHEMBL552747	1810
CCCCNC(=O)[C@@H]1CCC[C@H]1[C@H](O)[C@H](CC(C)C)NC(=O)[C@H](CCSC)NC(=O)[C@H](CC(C)C)NC(=O)C	CHEMBL190058	1820
C[C@@H](NC(=O)c1cc(cc(c1)c2onc(n2)[C@](C)(N)Cc3ccccc3)N(C)S(=O)(=O)C)c4ccc(F)cc4	CHEMBL1082894	1830
CC(=O)N[C@@H](Cc1cc(F)cc(F)c1)[C@H](O)CNC2(CCCCC2)c3cnn(c3)C(C)(C)C	CHEMBL1258917	1840
CO[C@@H](COCC1CC1)C[C@H](O)[C@H](COc2cc(F)cc(F)c2)NC(=O)c3cc(cc(c3)C(=O)N[C@H](C)c4ccccc4)N(C)S(=O)(=O)C	CHEMBL583697	1860
CCCN(CCC)C(=O)c1cccc(c1)C(=O)N[C@H](COCc2ccccc2)[C@@H](O)CC(=O)N[C@@H](C(C)C)C(=O)Nc3cc(cc(c3)C(=O)O)C(=O)O	CHEMBL447880	1890
CCCOc1ccc(cc1)c2csc(c2CC(=O)N=C(N)N)c3ccccc3	CHEMBL237061	1890
[Cl-].COc1ccc(NC(=O)c2cccc(NC(=O)C[n+]3cccc(c3)C(=O)N)c2)cc1	CHEMBL1164643	1900
C[C@H](NC[C@@H](O)[C@H](Cc1ccccc1)NC(=O)c2cccc(c2)N3CCCS3(=O)=O)C(=O)NC4CCCCC4	CHEMBL271437	1900
CC(=O)N[C@@H](Cc1cc(F)cc(F)c1)[C@H](O)CNC2(CC2)c3cccc(c3)N4CC5CCC4C5	CHEMBL1209420	1900
CC(C)(C)OC(=O)N1CCN(CC1)c2ccc(Br)cc2NC(=O)C3=CC(=O)c4ccccc4O3	CHEMBL206665	1900
CCCNC(=O)c1cc(cc(c1)C(=O)N[C@@H](Cc2ccccc2)[C@H](O)CNCc3cccc(OC)c3)C(=O)N	CHEMBL396010	1900
COCCCC1NC(=O)c2cc(cc(c2)C(=O)N[C@@H](COCc3cccc1c3)[C@@H](O)C[C@@H](C(C)C)C(=O)NCC(C)C)N(C)S(=O)(=O)C	CHEMBL1644467	1900
NC(=N)NC(=O)Cn1c(ccc1c2ccc(OCc3ccc(cc3)C#N)cc2)c4ccccc4	CHEMBL253421	1900
CCCCNC(=O)[C@@H](NC(=O)[C@H](C)C[C@H](O)[C@@H]1CSC\C=C/CSC[C@H](NC(=O)OC(C)(C)C)C(=O)N[C@@H](C)C(=O)N1)C(C)C	CHEMBL208681	1970
CN(C)c1cccc(CNC[C@@H](O)[C@H](Cc2ccccc2)NC(=O)[C@@H]3CN(Cc4cc(F)cc(F)c4)C(=O)N3)c1	CHEMBL413999	1970
C[C@@H](NC(=O)c1cc(cc(c1)c2cn(nn2)[C@H](CNCc3cccc(Br)c3)Cc4ccccc4)N(C)S(=O)(=O)C)c5ccccc5	CHEMBL1795872	2000
CC(C)C[C@H](NC(=O)[C@H](CC(=O)N)NC(=O)[C@@H](N)C(C)C)[C@@H](O)CC(=O)N[C@@H](C(C)C)C(=O)N[C@@H](C)C(=O)N[C@@H](CCC(=O)O)C(=O)N[C@@H](Cc1ccccc1)C(=O)O	CHEMBL137614	2000
CCCN(CCC)C(=O)c1cc(C)cc(c1)C(=O)N[C@@H](Cc2cc(F)cc(F)c2)[C@H](O)[C@H]3C[C@@H](Cc4ccc(OC)cc4)CCN3	CHEMBL428074	2000
CCCN(CCC)C(=O)c1cc(C)cc(c1)C(=O)N[C@@H](Cc2cc(F)cc(F)c2)[C@H](O)[C@H]3C[C@@H](CC4CCCCC4)CCN3	CHEMBL257087	2000
CSCC[C@H](NC(=O)[C@@H](NC(=O)C)C(C)C)C(=O)NC(CC(C)C)C(O)CC(=O)N[C@@H](C(C)C)C(=O)N[C@@H](C)C(=O)N[C@@H](C)C(=O)N[C@@H](Cc1ccccc1)C(=O)O	CHEMBL89713	2000
NC(=N)NC(=O)Cn1c(ccc1c2cc(Cl)ccc2Cl)c3ccc(F)cc3	CHEMBL251828	2000
NC(=N)NC(=O)Cn1c(ccc1c2ccccc2Cl)c3ccc(F)cc3	CHEMBL252626	2000
CO[C@@H](COCC=C)C[C@H](O)[C@H](COc1cc(F)cc(F)c1)NC(=O)c2cc(cc(c2)C(=O)N[C@H](C)c3ccccc3)N(C)S(=O)(=O)C	CHEMBL583700	2030
C[C@@H](NC(=O)c1cc(cc(c1)c2noc(n2)[C@](C)(N)Cc3ccccc3)N(C)S(=O)(=O)C)c4ccc(F)cc4	CHEMBL1096681	2060
CCNc1cc(cc(c1)C(=O)N[C@@H](Cc2ccccc2)[C@H](O)CNCc3ccc(OC)cc3)N4CCCC4=O	CHEMBL404500	2090
COc1cccc(CNC[C@@H](O)[C@H](Cc2cc(F)cc(F)c2)NC(=O)c3cc(cc(c3)\C(=N/OCC(C)C)\C)N4CCCCS4(=O)=O)c1	CHEMBL555520	2098
CCCCNC(=O)[C@H](C)C[C@@H](O)[C@@H]1C[C@H](C)CCCCCCCCCC(=O)N[C@@H](C)C(=O)N1	CHEMBL455207	2100
Oc1cc(O)cc(Oc2c(O)cc(O)c3Oc4c(Oc23)c(O)cc5oc6c(Oc7cc(O)cc(O)c7)c(O)cc(O)c6c45)c1	CHEMBL510508	2130
[Cl-].Cc1ccc(cc1)C(=O)Nc2cccc(NC(=O)C[n+]3cccc(c3)C(=O)NCCc4ccccc4)c2	CHEMBL1164187	2200
CCCN(CCC)C(=O)c1cccc(c1)C(=O)N[C@H](COCc2cc(F)cc(F)c2)[C@@H](O)CC(=O)N[C@@H](C(C)C)C(=O)Nc3cc(cc(c3)C(=O)O)C(=O)O	CHEMBL506251	2230
C[C@@H](NC(=O)c1cc(cc(c1)c2ccsc2)C(=O)N[C@@H](Cc3ccccc3)[C@H](O)CNC4CC4)c5ccccc5	CHEMBL473652	2233
CCNC(=O)c1ccc(cc1)c2ccc(c3ccccc3)n2Cc4cccc(N)n4	CHEMBL1090145	2250
CN1C(=NC(C1=O)(c2ccccc2)c3ccc(Cl)cc3)N	CHEMBL566007	2250
C[C@H](NC(=O)c1cc(cc(c1)C(=O)N[C@@H](COc2cc(F)cc(F)c2)[C@@H](O)CC(=O)NCC(=O)NCc3ccc(cc3)C(=O)O)N(C)S(=O)(=O)C)c4ccccc4	CHEMBL500708	2300
CCCN(CCC)C(=O)c1cc(C)cc(c1)C(=O)N[C@@H](Cc2cc(F)cc(F)c2)[C@H](O)[C@H]3CN(CCN3)S(=O)(=O)C	CHEMBL1097340	2300
CCCOc1cccc(C[C@@H]2CS(=O)(=O)C[C@H](NCc3cccc(c3)C(C)C)[C@H]2O)c1	CHEMBL1760733	2300
O[C@@H](CN(CCc1ccccc1)S(=O)(=O)c2ccc(Cl)cc2)CN3CCN(CC3)C(c4ccccc4)c5ccccc5	CHEMBL1275914	2300
CC(C)CNC(=O)[C@H](C)C[C@H](O)[C@H](CC(C)C)NC(=O)[C@H](Cc1ccccc1)NC(=O)[C@H](CC(C)C)NC(=O)OC(C)(C)C	CHEMBL1099361	2310
CCCN(CCC)C(=O)c1cc(cc(c1)C(=O)N[C@@H](Cc2ccccc2)[C@H](O)CNCCC3CCN(Cc4ccccc4)CC3)N(C)S(=O)(=O)C	CHEMBL451867	2392
CC(C)[C@H](NC(=O)[C@H](C)C[C@H](O)[C@@H]1CCCCCC[C@H](N)C(=O)N[C@@H](C)C(=O)N1)C(=O)NCc2ccccc2	CHEMBL200510	2397
CC(=O)N[C@@H](Cc1cc(F)cc(F)c1)[C@H](O)CNC2(CC2)c3cccc(c3)N4CC5CC4CO5	CHEMBL1209419	2400
CC(=O)N[C@@H](Cc1cc(F)cc(F)c1)[C@H](O)CNC2(CCOC2)c3cccc(c3)n4cccn4	CHEMBL572048	2400
Cc1ccc(NC(=O)CN2C(=O)\C(=N/NC(=O)c3cc(ccc3O)[N+](=O)[O-])\c4ccccc24)cc1	CHEMBL1080295	2400
COc1cccc2C=C(C(=O)Nc3cc(Br)ccc3N4CCN(CC4)C(=O)OC(C)(C)C)C(=O)Oc12	CHEMBL206854	2400
OC1CC(O)C(CC1Nc2cccc(c2)C#C)Nc3cccc(c3)c4cn(nn4)[C@H](CNCc5cccc(Br)c5)Cc6ccccc6	CHEMBL1795874	2400
CC(=O)N[C@@H](Cc1cc(F)cc(F)c1)[C@H](O)CNC2(CCCCC2)c3cc(ncn3)C(C)(C)C	CHEMBL1257302	2430
CCNc1cc(cc(c1)C(=O)N[C@@H](Cc2ccccc2)[C@H](O)CNC3CCCC3)N4CCCC4=O	CHEMBL402122	2450
COc1ccc(cc1)c2ccc(c3ccccc3Cl)n2Cc4cccc(N)n4	CHEMBL1093152	2450
C[C@H](NC(=O)c1cc(NC(=O)CC[C@@](O)(Cc2ccccc2)C(=O)N[C@H]3[C@H](O)Cc4ccccc34)cc(c1)N(C)S(=O)(=O)C)c5ccccc5	CHEMBL539397	2500
CN1C(=NC(C1=O)(c2ccccc2)c3cccc(Cl)c3)N	CHEMBL578410	2500
O[C@H]1Cc2c(O)cc(O)cc2O[C@@H]1c3cc(O)c(O)c(O)c3	CHEMBL125743	2500
COc1cc(cc(c1)C(=O)N[C@@H](Cc2ccccc2)[C@H](O)CNC3CC3)C(=O)N[C@H](C)c4ccccc4	CHEMBL479421	2506
CC(C)[C@H](NC(=O)[C@H](C)C[C@H](O)[C@H](Cc1ccccc1)NC(=O)[C@H](C)NC(=O)[C@H](CN(C)C)NC(=O)OC(C)(C)C)C(=O)NCc2ccncc2	CHEMBL81218	2530
Brc1ccc(N2CCN(CC2)S(=O)(=O)c3cccs3)c(NC(=O)C4=CC(=O)c5ccccc5O4)c1	CHEMBL206097	2600
CC(=CC[C@H](Cc1c(O)cc(O)c2C(=O)C[C@H](Oc12)c3ccccc3O)C(=C)C)C	CHEMBL455679	2600
CN1C(=N)N[C@](CCC2CCCCC2)(CC3CCCCC3)C1=O	CHEMBL583178	2600
NC1=NC(C2=NCCCN12)(c3ccc(OC(F)(F)F)cc3)c4cccc(Br)c4	CHEMBL567654	2600
CC(C)CNC(=O)[C@H](C)C[C@H](O)[C@H](CC(C)C)NC(=O)[C@H](Cc1ccc(cc1)[N+](=O)[O-])NC(=O)c2ccc(cc2)[N+](=O)[O-]	CHEMBL1099022	2640
CN1C(=NC(C1=O)(c2ccccc2)c3ccncc3)N	CHEMBL597233	2680
C[C@@H](NC(=O)c1cc(cc(c1)[N+](=O)[O-])C(=O)N[C@@H](Cc2ccccc2)[C@H](O)CNCCC3CCN(Cc4ccccc4)CC3)c5ccc(F)cc5	CHEMBL505154	2682
CCNc1cc(cc(c1)C(=O)N[C@@H](Cn2cccn2)[C@H](O)CNCc3cccc(OC)c3)N4CCCCS4(=O)=O	CHEMBL399862	2690
C[C@@H](NC(=O)c1cc(cc(c1)C(=O)NC(CO)(CO)Cc2ccccc2)N(C)S(=O)(=O)C)c3ccc(F)cc3	CHEMBL218846	2700
CCCCNC(=O)[C@H](C)C[C@H](O)[C@H](Cc1ccccc1)NC(=O)[C@@H]2CCC[C@@H](C2)C3(CCCC3)NC(=O)C	CHEMBL1084153	2700
CCCN(CCC)C(=O)c1cc(C)cc(c1)C(=O)N[C@@H](Cc2cc(F)cc(F)c2)[C@H](O)[C@H]3CCN3	CHEMBL272320	2800
CCCN(CCC)C(=O)c1cccc(c1)C(=O)N[C@@H](Cc2cc(F)cc(F)c2)[C@@H](O)C[C@@H](CC)C(=O)NCCC(=O)O	CHEMBL295996	2800
COc1ccc(C[C@@H]2CS(=O)(=O)C[C@H](NCc3cccc(c3)C(C)C)[C@H]2O)cc1Br	CHEMBL1760852	2800
COc1ccc(CCNC(=O)CSc2nc3ccc(Nc4nc(nc(n4)N5CCCCC5)N6CCCCC6)cc3s2)cc1OC	CHEMBL1269608	2800
O[C@@H]([C@H](Cc1cc(F)cc(F)c1)NC(=O)[C@@H]2CN(Cc3ccc(F)cc3)C(=O)C2)[C@H]4C[C@H](CN4)OCc5ccccc5	CHEMBL403241	2800
Cc1cccc(NC(=O)CSc2nc3ccc(Nc4nc(nc(n4)N5CCCC5)N6CCCC6)cc3s2)c1C	CHEMBL1271192	2830
CCCC(=O)Nc1cccc(c1)C2(N=C(N)N(C)C2=O)C3CCCCC3	CHEMBL595302	2850
CCCN(CCC)C(=O)c1cc(C)cc(c1)C(=O)N[C@@H](Cc2cc(F)cc(F)c2)[C@H](O)[C@H]3CN(CCN3)S(=O)(=O)c4cnoc4C	CHEMBL1097335	2900
CN(c1cc2cc(c1)C(=O)NC(CO)Cc3cccc(OCCNC2=O)c3)S(=O)(=O)C	CHEMBL386666	2900
COCCCN1C[C@H](CC1=O)C(=O)N[C@@H](Cc2cc(F)cc(F)c2)[C@H](O)[C@H]3C[C@H](CN3)OCc4ccccc4	CHEMBL255336	2950
CC(C)[C@H](NC(=O)[C@@H](NC(=O)[C@@H](N)CNC(=O)c1nn[nH]n1)C(C)C)C(=O)NCC(O)C(=O)Nc2cccc(c2)C(=O)O	CHEMBL1645518	3000
CC(C)C[C@H](NC(=O)C(O)c1cccc2ccccc12)[C@@H](O)CC(=O)N[C@@H](C(C)C)C(=O)NC3C[C@H](C[C@H](C3)C(=O)O)C(=O)O	CHEMBL297486	3000
CC(C)CC(NC(=O)C(O)c1ccccc1Br)[C@@H](O)CC(=O)N[C@H](C(C)C)C(=O)N[C@H](C)C(=O)N[C@H](CCC(=O)O)C(=O)N[C@H](Cc2ccccc2)C(=O)O	CHEMBL51304	3000
Cc1nc(N\C(=N/C(=O)Nc2ccccc2)\NC(=O)Nc3ccccc3)nc4ccccc14	CHEMBL1782314	3000
CCCCNC(=O)c1ccc(cc1)c2ccc(c3ccccc3)n2Cc4cccc(N)n4	CHEMBL1090147	3000
CCCN(CCC)C(=O)c1cc(C)cc(c1)C(=O)N[C@@H](Cc2cc(F)cc(F)c2)[C@H](O)[C@H]3C[C@H](CCN3)OC(=O)C	CHEMBL256676	3000
CCCNC(=O)c1ccc(cc1)c2ccc(c3ccccc3)n2Cc4cccc(N)n4	CHEMBL1090146	3000
NC(=N)NC(=O)Cn1c(ccc1c2ccccc2Cl)c3ccccc3	CHEMBL404860	3000
O=C(CSc1nc2ccc(Nc3nc(nc(n3)N4CCCC4)N5CCCC5)cc2s1)NCCOc6ccccc6	CHEMBL1270985	3000
COc1ccc(cc1)C2=CC(=O)c3c(O)cc(O)c(c3O2)c4cc(ccc4OC)C5=CC(=O)c6c(O)cc(O)cc6O5	CHEMBL1208903	3010
CC(=O)N[C@@H](Cc1cc(F)cc(F)c1)[C@H](O)CNC2(CC2)c3csc(CC(C)(C)C)n3	CHEMBL1257894	3050
COc1ccc(cc1)C2(N=C(N)N(C)C2=O)c3ccccc3	CHEMBL577905	3100
COc1ccc(cc1)C2NC(=O)c3cc(cc(c3)C(=O)N[C@@H](COCc4cccc2c4)[C@@H](O)C[C@@H](C(C)C)C(=O)NCC(C)C)N(C)S(=O)(=O)C	CHEMBL1644466	3100
CN(C)c1cccc(CNC[C@@H](O)[C@H](Cc2ccccc2)NC(=O)[C@@H]3CN(Cc4ccccc4C(F)(F)F)C(=O)N3)c1	CHEMBL260722	3120
CC[C@H](C)[C@H](O)C(=O)N[C@@H](CC(F)F)C(=O)N[C@@H](Cc1ccccc1)[C@@H](O)C[C@@H](CC(F)F)C(=O)N[C@@H](C(C)C)C(=O)NCc2ccncc2	CHEMBL85379	3180
COC1=CC2CCC(Cc3cc(ccc3OC)[N+](=O)[O-])(C2C=C1)c4cn(C)c(N)n4	CHEMBL568557	3200
COc1ccc(cc1F)C(Cc2cc(ccc2OC)[N+](=O)[O-])c3c[nH]c(N)n3	CHEMBL522520	3200
C[C@@H](NC(=O)c1cc(cc(c1)C(=O)N[C@@H](Cc2ccccc2)[C@H](O)CNCC3CCN(Cc4ccccc4)CC3)N(C)S(=O)(=O)C)c5ccc(F)cc5	CHEMBL445960	3233
COc1cc(O)c(CC(CC=C(C)C)C(=C)C)c2O[C@@H](CC(=O)c12)c3ccc(O)cc3O	CHEMBL243796	3300
CCCCNC(=O)[C@@H](NC(=O)[C@H]1[C@@H](CN(CC)C1=O)[C@H](O)[C@H](CC(C)C)NC(=O)[C@H](CCSC)NC(=O)[C@H](CC(C)C)NC(=O)C)C(C)C	CHEMBL191100	3350
CC(=CCC1=C(Oc2c(CC=C(C)C)c(O)cc(O)c2C1=O)c3ccc(O)cc3O)C	CHEMBL518543	3400
Nc1cccc(Cn2c(ccc2c3ccc(cc3)C(=O)NC4CCC4)c5ccccc5)n1	CHEMBL1093121	3400
OC1CC(Nc2cccc(c2)c3cn(nn3)[C@H](CNCc4cccc(Br)c4)Cc5ccccc5)C(O)CC1Nc6cccc(c6)C#C	CHEMBL1795873	3400
CCCCNC(=O)[C@@H](NC(=O)[C@@H]1CN(C)C[C@H]1[C@H](O)[C@H](CC(C)C)NC(=O)[C@H](CCSC)NC(=O)[C@H](CC(C)C)NC(=O)C)C(C)C	CHEMBL439671	3440
Cc1ccc(cc1C(=O)N[C@@H](Cc2ccccc2)[C@H](O)CNCc3cccc(c3)C(F)(F)F)N(c4ccccc4)S(=O)(=O)C	CHEMBL1210356	3470
COc1cccc(c1)C2(N=C(N)N(C)C2=O)c3ccccc3	CHEMBL576628	3470
NC(=N)NC(=O)Cn1c(ccc1c2cc(Cl)ccc2Cl)c3ccccc3	CHEMBL399837	3500
OC(=O)C(F)(F)F.Brc1ccc(N2CCNCC2)c(NC(=O)c3ccc4ccccc4n3)c1	CHEMBL377745	3500
CC(C)[C@H](NC(=O)[C@H](C)C[C@H](O)[C@H](COCc1cc(F)cc(F)c1)NC(=O)c2cc(cc(c2)C(=O)N[C@H](C)c3ccccc3)N(C)S(=O)(=O)C)C(=O)NCc4ccc(F)cc4	CHEMBL1076910	3600
CCCNC(=O)c1cc(cc(c1)C(=O)N[C@@H](CC(C)C)[C@@H](O)C[C@@H](C)C(=O)N[C@@H](C(C)C)C(=O)NC(C)C)N(C)S(=O)(=O)C	CHEMBL227641	3600
CCNc1cc(cc(c1)C(=O)N[C@@H](Cc2ccccc2)[C@H](O)CNCc3cnn(CC)c3)N4CCCCS4(=O)=O	CHEMBL399656	3633
COc1cccc(CNC[C@@H](O)[C@H](Cc2ccccc2)NC(=O)CCS(=O)(=O)C3CCCCC3)c1	CHEMBL398925	3670
[Cl-].COc1ccc(NC(=O)c2cccc(NC(=O)C[n+]3ccccc3)c2)cc1	CHEMBL1164437	3700
CC(C)CNC(=O)[C@@H](C[C@H](O)[C@@H]1COCc2cccc(c2)C(NC(=O)c3cc(cc(c3)C(=O)N1)N(C)S(=O)(=O)C)c4ccccc4)C(C)C	CHEMBL1644464	3700
CCCCNC(=O)[C@H](C)C[C@@H](O)[C@H](CC(C)C)NC(=O)[C@@H](C)NC(=O)CCC(C)C	CHEMBL461607	3700
CN(c1cc2COC(=O)[C@](C)(N)Cc3cccc(CC[C@@H](NC(c(c2)c1)C(F)(F)F)c4ccccc4)c3)S(=O)(=O)C	CHEMBL392564	3700
NC(=N)NC(=O)Cn1c(ccc1c2ccccc2)c3ccccc3	CHEMBL217068	3700
CC(C)CNC(=O)CNC[C@H](Cc1ccccc1)NC(=O)c2cc(cc(c2)C(=O)N[C@H](C)c3ccc(F)cc3)N(C)S(=O)(=O)C	CHEMBL384678	3710
COc1cccc(CNC[C@@H](O)[C@H](Cc2ccccc2)NC(=O)CCS(=O)(=O)N3CCCCC3)c1	CHEMBL252960	3785
CC(C)CNC(=O)[C@H](C)C[C@H](O)[C@H](CC(C)C)NC(=O)[C@H](Cc1ccc(cc1)[N+](=O)[O-])NC(=O)\C=C\c2ccc(cc2)C(F)(F)F	CHEMBL1099021	3790
CC(=O)c1ccc(Oc2ccc(cc2)c3ccc(c4ccccc4Cl)n3CC(=O)NC(=N)N)cc1	CHEMBL253237	3800
CN1C(=O)CC(C)(N=C1N)c2ccccc2	CHEMBL239638	3800
O=C(CCCCC1SCCS1)N2CCN(CC2)c3ccc(cc3NC(=O)c4cccc5ccccc45)c6ccccc6	CHEMBL211097	3800
COc1ccc(cc1OC)C(=O)N[C@@H](Cc2ccc(cc2)[N+](=O)[O-])C(=O)N[C@@H](CC(C)C)[C@@H](O)C[C@@H](C)C(=O)NCC(C)C	CHEMBL1099023	3810
CC(C)C[C@H](NC(=O)[C@@H]1CC(=O)NCCCCCOC(=O)N[C@@H](C(C)C)C(=O)N1)[C@@H](O)C[C@@H](C)C(=O)N[C@@H](C(C)C)C(=O)NCc2ccccc2	CHEMBL361977	3900
C[C@@H](NC(=O)c1cc(cc(c1)C(=O)N[C@@H](Cc2ccccc2)[C@H](O)CNCC3CCN(Cc4ccccc4)CC3)N(C)S(=O)(=O)C)c5ccccc5	CHEMBL499686	3999
[Cl-].Cc1ccc(NC(=O)c2cccc(NC(=O)C[n+]3cccc(c3)C(=O)NCCc4ccccc4)c2)cc1	CHEMBL1163776	4000
C[C@H](NC(=O)c1cc(cc(c1)C(=O)N[C@@H](COc2cc(F)cc(F)c2)[C@@H](O)CC(=O)NCc3ccc(cc3)C(=O)O)N(C)S(=O)(=O)C)c4ccccc4	CHEMBL453705	4000
CC(=O)N[C@@H](Cc1cc(F)cc(F)c1)[C@H](O)CNC2(CC2)c3cccc(c3)C4COCCO4	CHEMBL1209418	4000
CC(C)CC(NC(=O)C(O)c1cccc2ccccc12)[C@@H](O)CC(=O)N[C@H](C(C)C)C(=O)N[C@H](C)C(=O)N[C@H](CCC(=O)O)C(=O)N[C@H](Cc3ccccc3)C(=O)O	CHEMBL297910	4000
CCCCNC(=O)[C@H](C)C[C@H](O)[C@H](CC(C)C)NC(=O)[C@H](CCSC)NC(=O)[C@H](C)NC(=O)C	CHEMBL1088215	4000
CCCN(CCC)C(=O)c1cc(C)cc(c1)C(=O)N[C@@H](Cc2cc(F)cc(F)c2)[C@H](O)[C@@H]3NCCN(CCC)C3=O	CHEMBL451218	4000
COC(=O)c1ccc(NC(=O)[C@@H](NC(=O)CCC(O)(Cc2ccccc2)C(=O)Nc3cc(cc(c3)C(=O)N[C@@H](C)c4ccc(F)cc4)N(C)S(=O)(=O)C)C(C)C)cc1	CHEMBL556529	4000
CSCC[C@H](NC(=O)[C@@H](NC(=O)OC(C)(C)C)C(C)C)C(=O)NC(CC(C)C)[C@@H](O)CC(=O)N[C@H](C(C)C)C(=O)NCc1ccc(cc1)C(=O)O	CHEMBL297913	4000
CSCC[C@H](NC(=O)[C@@H](NC(=O)OC(C)(C)C)C(C)C)C(=O)NC(CC(C)C)[C@@H](O)CC(=O)N[C@H](C(C)C)C(=O)NCc1cccc(c1)C(=O)O	CHEMBL300657	4000
CC(C)c1ccc(s1)C2(CCCCC2)NC[C@@H](O)[C@H](Cc3cc(F)cc(F)c3)NC(=O)C	CHEMBL1258234	4010
Cc1cccc(c1)C(=O)N[C@@H](Cc2cc(F)cc(F)c2)[C@H](O)CNCc3cccc(I)c3	CHEMBL254626	4100
COc1cccc(CNC[C@@H](O)[C@H](Cc2ccccc2)NC(=O)CCCS(=O)(=O)c3ccccc3)c1	CHEMBL252547	4131
COc1cc(O)c2C(=O)C=C(Oc2c1)c3ccc(OC)c(c3)c4c(O)cc(O)c5C(=O)C=C(Oc45)c6ccc(O)cc6	CHEMBL377324	4180
Nc1ncccc1NCc2cc(ccc2OCc3ccccn3)c4ccc5cc[nH]c5c4	CHEMBL220428	4200
O[C@H]1[C@H](Cc2ccc(O)c(Br)c2)CS(=O)(=O)C[C@@H]1NCc3cc(Cl)cc(Cl)c3	CHEMBL1760867	4200
COc1ccc(cc1)C2=CC(=O)c3c(O)cc(O)c(c3O2)c4cc(ccc4O)C5=CC(=O)c6c(O)cc(OC)cc6O5	CHEMBL144630	4210
CC(C)CNC(=O)[C@H](C)C[C@H](O)[C@H](CC(C)C)NC(=O)[C@H](Cc1ccc(cc1)[N+](=O)[O-])NC(=O)c2ccc(Cl)cc2Cl	CHEMBL1099025	4240
CC(C)c1ccnc(CN[C@H]2CS(=O)(=O)C[C@@H](Cc3ccc(O)c(Br)c3)[C@@H]2O)c1	CHEMBL1760864	4300
CC(=O)N[C@@H](Cc1cc(F)cc(F)c1)[C@H](O)CNC2(CCCCC2)c3cc(cs3)C#C	CHEMBL1258575	4316
CC(=O)N[C@@H](Cc1cc(F)cc(F)c1)[C@H](O)[C@H]2CN(CCN2)S(=O)(=O)c3cccc(C)c3	CHEMBL1087742	4350
CC(C)C[C@H](NC(=O)[C@@H](NC(=O)[C@@H](N)CNC(=O)c1nn[nH]n1)C(C)C)C(=O)O	CHEMBL1645528	4400
CCn1cc2CCS(=O)(=O)N(C)c3cc(cc1c23)C(=O)N[C@@H](Cc4ccccc4)[C@@H](O)CNCC(F)(F)C(F)(F)F	CHEMBL563114	4427
CC(=O)N[C@@H](Cc1cc(F)cc(F)c1)[C@H](O)CNC2(CCCCC2)c3onc(c3)C(C)(C)C	CHEMBL1258686	4457
CC(C)[C@H](O)C(=O)N[C@@H](COC(C)(C)C)C(=O)N[C@@H](Cc1ccccc1)[C@@H](O)C[C@@H](C)C(=O)N[C@@H](C(C)C)C(=O)NCc2ccncc2	CHEMBL85378	4490
CC(C)[C@H](NC(=O)[C@H](C)C[C@H](O)[C@H](COCc1cc(F)cc(F)c1)NC(=O)c2cc(cc(c2)C(=O)N[C@H](C)c3ccccc3)N(C)S(=O)(=O)C)C(=O)NCc4ccccc4	CHEMBL1076902	4500
Br.CS(=O)(=O)N(c1cccc(c1)C(=O)N[C@@H](Cc2ccccc2)[C@H](O)CNCc3cccc(c3)C(F)(F)F)c4ccccn4	CHEMBL1788375	4570
Cc1cccc(c1)c2ccc(c3ccccc3)n2CC(=O)NC(=N)N	CHEMBL399423	4600
Fc1cccc(c1)N2C(=O)N=C(NC3CCCCC3)C24CCN(Cc5cccc(c5)c6ccccc6)CC4	CHEMBL522878	4600
CN(c1cc(Cc2ccccc2)cc(c1)C(=O)N[C@@H](Cc3ccccc3)[C@H](O)CNC4CC4)S(=O)(=O)C	CHEMBL201940	4630
CC(C)CNC(=O)[C@H](C)C[C@H](O)[C@H](CC(C)C)NC(=O)[C@H](Cc1ccccc1)NC(=O)c2cccc3ccccc23	CHEMBL1086716	4670
CC(=O)N[C@@H](Cc1cc(F)cc(F)c1)[C@H](O)CNC2(CCNCC2)c3cccc(c3)C(C)(C)C	CHEMBL566809	4700
C[C@@H](NC(=O)c1cc(cc(c1)c2n[nH]c(n2)[C@](C)(N)Cc3ccccc3)N(C)S(=O)(=O)C)c4ccc(F)cc4	CHEMBL1092147	4740
Oc1ccc(cc1C(=O)N\N=C\2/C(=O)N(CC(=O)NC3CCCCC3)c4ccccc24)[N+](=O)[O-]	CHEMBL1080086	4800
CC(=O)N[C@@H](Cc1cc(F)cc(F)c1)[C@H](O)CNC2(CC2)c3oc(cn3)C(C)(C)C	CHEMBL1257774	4900
CC(C)[C@H](NC(=O)[C@H](C)C[C@H](O)[C@@H]1CCCCCC[C@H](NC(=O)OC(C)(C)C)C(=O)N[C@@H](C)C(=O)N1)C(=O)NCc2ccncc2	CHEMBL370185	4925
COc1cccc2C=C(C(=O)Nc3cc(Br)ccc3N4CCNCC4)C(=O)Oc12	CHEMBL1165583	5000
COc1cccc2C=C(C(=O)Nc3cc(Br)ccc3N4CCNCC4)C(=O)Oc12.OC(=O)C(F)(F)F	CHEMBL206557	5000
CSCC[C@H](NC(=O)[C@@H](NC(=O)C)C(C)C)C(=O)N[C@@H](CC1CCCCC1)C(O)CC(=O)N[C@@H](C(C)C)C(=O)N[C@@H](C)C(=O)N[C@@H](CCC(=O)O)C(=O)N[C@@H](Cc2ccccc2)C(=O)O	CHEMBL89118	5000
CSCC[C@H](NC(=O)[C@@H](NC(=O)C)C(C)C)C(=O)NC(CC(C)C)C(O)CC(=O)N[C@@H](C)C(=O)N[C@@H](C)C(=O)N[C@@H](CCC(=O)O)C(=O)N[C@@H](Cc1ccccc1)C(=O)O	CHEMBL90615	5000
CSCC[C@H](NC(=O)[C@@H](NC(=O)OC(C)(C)C)C(C)C)C(=O)NC(CC(C)C)[C@@H](O)CC(=O)N[C@H](C(C)C)C(=O)NCc1cccc(OCC(=O)O)c1	CHEMBL51188	5000
C[C@H](Cc1cc2cc(ccc2nc1N)c3ccccc3C)C(=O)NCc4ccccc4	CHEMBL1821821	5100
O[C@@H](CN(CCc1ccccc1)S(=O)(=O)c2ccccc2)CN3CCN(CC3)C(c4ccccc4)c5ccccc5	CHEMBL1278097	5100
Brc1ccc(N2CCN(Cc3ccccc3)CC2)c(NC(=O)c4cccc5ccccc45)c1	CHEMBL380521	5200
Cc1ccccc1c2cccc(CN3CCC4(CC3)N(C(=O)N=C4NC5CCCCC5)c6cccc(F)c6)c2	CHEMBL521845	5200
CN(C1CCCCC1)C(=O)CCc2cc3cc(ccc3nc2N)c4ccccc4C	CHEMBL1821810	5200
Nc1cccc(Cn2c(ccc2c3ccccc3)c4ccccc4)n1	CHEMBL1092879	5200
COc1cccc(CNC[C@@H](O)[C@H](Cc2ccccc2)NC(=O)CCS(=O)(=O)c3ccccc3)c1	CHEMBL437961	5214
C[C@H](NC[C@@H](O)[C@H](Cc1ccccc1)NC(=O)c2cccc(c2)N3CCCC3=O)C(=O)NC4CCCCC4	CHEMBL271230	5300
CC(=CCC1=C(Oc2cc(O)cc(O)c2C1=O)c3ccc(O)c4C=CC(C)(C)Oc34)C	CHEMBL1770312	5300
NC1=NC(C2=NCCCN12)(c3ccccc3)c4cccc(Cc5ccccc5)c4	CHEMBL566977	5300
CC(C)[C@H](NC(=O)[C@H](C)C[C@H](O)[C@@H]1CCCCCN([C@@H](C)C(=O)N1)C(=O)[C@@H](NC(=O)OC(C)(C)C)C(C)C)C(=O)NCc2ccncc2	CHEMBL200617	5305
Oc1cc(O)c2Oc3c(Oc2c1)c(O)cc4Oc5c(O)cc(O)cc5Oc34	CHEMBL559870	5350
C[C@H](NC[C@@H](O)[C@H](Cc1ccccc1)NC(=O)c2cccc(c2)S(=O)(=O)C)C(=O)NC3CCCCC3	CHEMBL402120	5400
CC[C@H](NCC1Cc2cccc(OCCNC(=O)c3cc(cc(c3)C(=O)N1)N(C)S(=O)(=O)C)c2)C(=O)NCC(C)C	CHEMBL384496	5400
O[C@@H](CN(CC1CC1)S(=O)(=O)c2ccc(Cl)c(Cl)c2)CN3CCN(CC3)C(c4ccccc4)c5ccccc5	CHEMBL1276846	5400
C[C@H](NC[C@@H](O)[C@H](Cc1ccccc1)NC(=O)c2cccc(NS(=O)(=O)Cc3ccccc3)c2)C(=O)NC4CCCCC4	CHEMBL1210335	5500
CN(c1cc(cc(c1)C(=O)N[C@@H](Cc2ccccc2)[C@H](O)CNC3CC3)C(O)Cc4ccccc4)S(=O)(=O)C	CHEMBL202015	5500
COc1cccc2C=C(C(=O)Nc3cc(Br)ccc3N4CCN(Cc5ccccc5)CC4)C(=O)Oc12	CHEMBL381617	5500
CN(C)c1cccc(CNC[C@@H](O)[C@H](Cc2ccccc2)NC(=O)[C@@H]3CN(Cc4cc(F)c(F)cc4F)C(=O)N3)c1	CHEMBL410865	5590
CC(C)[C@H](NC(=O)C[C@H](O)[C@H](CC1CCCCC1)NC(=O)C[C@H](O)[C@H](Cc2ccccc2)NC(=O)[C@H](Cc3ccccc3)NC(=O)C)C(=O)NCc4ccc(cc4)C(=O)O	CHEMBL419949	5600
CC(C)[C@H](NC(=O)CCC(O)(CCc1ccccc1)C(=O)Nc2cc(cc(c2)C(=O)N[C@@H](C)c3ccccc3)N(C)S(=O)(=O)C)C(=O)NCc4ccccc4	CHEMBL557127	5600
CC(C)C[C@H](NC(=O)c1cc(cc(c1)C(=O)NCc2ccccc2)N(C)S(=O)(=O)C)[C@@H](O)C[C@@H](C)C(=O)N[C@@H](C(C)C)C(=O)NC(C)C	CHEMBL227758	5600
NC(=N)NC(=O)Cn1c(ccc1c2ccc(NC(=O)c3cccc(Br)c3)cc2)c4ccccc4	CHEMBL252189	5600
CCCC(C)S(=O)(=O)CCC(=O)N[C@@H](Cc1ccccc1)[C@H](O)CNCc2cccc(OC)c2	CHEMBL252755	5614
COc1ccc(cc1)C(Cc2cc(ccc2OC)[N+](=O)[O-])c3c[nH]c(N)n3	CHEMBL494015	5700
C[C@@H](NC(=O)c1cc(CNC(=O)C(C)(N)Cc2ccccc2)cc(c1)N(C)S(=O)(=O)C)c3ccc(F)cc3	CHEMBL1082893	5720
CN(C)c1cccc(CNC[C@@H](O)[C@H](Cc2ccccc2)NC(=O)[C@@H]3CN(Cc4ccc(F)c(F)c4)C(=O)N3)c1	CHEMBL260634	5740
CCNc1cc(cc(c1)C(=O)N[C@@H](C(C)C)[C@H](O)CNCc2cccc(OC)c2)N3CCCCS3(=O)=O	CHEMBL254273	5750
CCNc1cc(cc(c1)C(=O)N[C@@H](Cc2ccccc2)[C@H](O)CNCC3CCCCC3)N4CCCC4=O	CHEMBL252262	5890
C[C@@H](NC(=O)c1cc(cc(c1)C(=O)N[C@H](CN)Cc2ccccc2)N(C)S(=O)(=O)C)c3ccc(F)cc3	CHEMBL211937	5900
CC(C)[C@H](NC(=O)CCC(O)(Cc1ccccc1)C(=O)Nc2cc(cc(c2)C(=O)N[C@@H](C)c3ccc(F)cc3)N(C)S(=O)(=O)C)C(=O)NCc4ccccc4	CHEMBL555054	5900
CN(c1cc(cc(c1)C(=O)N[C@@H](Cc2ccccc2)[C@H](O)CNC3CC3)C(O)c4ccccc4)S(=O)(=O)C	CHEMBL201802	5900
CC(C)CC(NC(=O)C(O)c1cccc(Oc2ccccc2)c1)[C@@H](O)CC(=O)N[C@H](C(C)C)C(=O)N[C@H](C)C(=O)N[C@H](CCC(=O)O)C(=O)N[C@H](Cc3ccccc3)C(=O)O	CHEMBL298147	6000
CN(c1cc2COC(=O)[C@](C)(N)Cc3cccc(CCCCN(CC4CC4)c(c2)n1)c3)S(=O)(=O)C	CHEMBL394224	6000
CC(C)C[C@H](NC(=O)[C@@H](NC(=O)[C@@H](N)CNC(=O)c1nn[nH]n1)C(C)C)C(=O)NCC(O)C(=O)O	CHEMBL1645526	6100
CC(=O)N[C@@H](Cc1cc(F)cc(F)c1)[C@H](O)CNC2(CCCCC2)c3cccc(c3)C#N	CHEMBL1208934	6200
CC(C)c1cccc(CN[C@H]2CS(=O)(=O)C[C@@H](Cc3ccc(O)c(Cc4cccc(C)c4)c3)[C@@H]2O)c1	CHEMBL1760853	6200
COc1cc(O)c2C(=O)C=C(Oc2c1)c3ccc(O)c(c3)c4c(OC)cc(O)c5C(=O)C=C(Oc45)c6ccc(O)cc6	CHEMBL1208793	6250
C[C@H](NC[C@@H](O)[C@H](Cc1ccccc1)NC(=O)c2cccc(Nc3ccccc3)c2)C(=O)NC4CCCCC4	CHEMBL1210330	6300
O[C@@H](CN(Cc1ccccc1)S(=O)(=O)c2ccc(Cl)cc2)CN3CCN(CC3)C(c4ccccc4)c5ccccc5	CHEMBL1277921	6300
COc1cccc(CNC[C@@H](O)[C@H](Cc2ccccc2)NC(=O)CCCS(=O)(=O)N3CCCCC3)c1	CHEMBL252756	6461
CO[C@@H](COc1ccccc1)C[C@H](O)[C@H](COc2cc(F)cc(F)c2)NC(=O)c3cc(cc(c3)C(=O)N[C@H](C)c4ccccc4)N(C)S(=O)(=O)C	CHEMBL573378	6500
FC(F)(F)c1ccc(cc1)C2=CC(=O)C(=CC2=O)c3ccccc3	CHEMBL1762560	6520
CCCN(CCC)C(=O)c1cccc(c1)C(=O)N[C@@H](Cc2cc(F)cc(F)c2)[C@@H](O)C[C@@H](CC)C(=O)N[C@H]3C[C@H](C[C@H](C3)OC)OC	CHEMBL295109	6600
COc1cc(O)ccc1[C@@H]2CC(=O)c3c(OC)cc(O)c(C[C@@H](CC=C(C)C)C(=C)C)c3O2	CHEMBL496451	6700
CC(=O)N[C@@H](Cc1cc(F)cc(F)c1)[C@H](O)CNC2(CCCCC2)c3ccc(Br)c(c3)C(C)(C)C	CHEMBL1258120	6900
NC(=NC(=O)Cc1c(csc1c2ccc(OCCc3cn[nH]c3)cc2)c4ccccc4Cl)N	CHEMBL393559	6900
CC(C)CNC(=O)[C@H](C)C[C@H](O)[C@H](CC(C)C)NC(=O)[C@H](Cc1ccccc1)NC(=O)c2ccccc2	CHEMBL1087609	6930
CC(C)CC1(C)NC(=N)N(Cc2ccc(CNC(=O)Nc3ccc(cc3)C#N)cc2)C1=O	CHEMBL584963	7000
CC[C@@H](CC(=O)NCC1CCCCC1)n2c(N)nc3cc(Cl)ccc23	CHEMBL1222240	7000
CN(c1cc2COC(=O)[C@](C)(N)Cc3cccc(CCC(CCc(c2)n1)c4ccccc4)c3)S(=O)(=O)C	CHEMBL235854	7000
COc1cccc(CNC[C@H](Cc2ccccc2)n3cc(nn3)c4cc(cc(c4)C(=O)N[C@H](C)c5ccccc5)N(C)S(=O)(=O)C)c1	CHEMBL1795871	7000
C[C@@H](NC(=O)c1cc(cc(c1)[N+](=O)[O-])C(=O)N[C@@H](Cc2ccccc2)[C@H](O)CNCCC3CCN(Cc4ccccc4)CC3)c5ccccc5	CHEMBL501029	7021
COc1ccc(Cc2cccc(c2)C3(N=C(N)N4CCCN=C34)c5ccccc5)cc1	CHEMBL568506	7100
OC(=O)c1cc(ccc1Cl)c2oc(\C=N\Nc3nc(Nc4ccc(F)cc4)nc(n3)N5CCOCC5)cc2	CHEMBL1164540	7100
N\C(=N\C(=O)Cn1c(ccc1C23CC4CC(CC(C4)C2)C3)c5ccccc5)\NC6CCCCC6	CHEMBL404256	7200
C(CCCNc1c2CCCCc2nc3ccccc13)CCCNc4c5CCCCc5nc6ccccc46	CHEMBL32823	7500
CC(C)C[C@H](NC(=O)C(O)c1cccc2ccccc12)[C@@H](O)C[C@@H](C(C)C)C(=O)N[C@@H](C)C(=O)N[C@@H](CCC(=O)O)C(=O)N[C@@H](Cc3ccccc3)C(=O)O	CHEMBL288168	7500
CN1C(=NC(C)(CC1=O)c2ccc(Cl)c(Cl)c2)N	CHEMBL239425	7500
CC(=O)N[C@@H](Cc1cc(F)cc(F)c1)[C@H](O)CNC2(CCCCC2)c3cccc(c3)n4nccn4	CHEMBL1209057	7700
COCCC(=O)Nc1cccc(c1)C2(N=C(N)N(C)C2=O)C3CCCCC3	CHEMBL594656	7860
C[C@H](NC[C@@H](O)[C@H](Cc1ccccc1)NC(=O)c2cccc(NS(=O)(=O)c3ccccc3)c2)C(=O)NC4CCCCC4	CHEMBL1210334	7900
CCCN(CCC)S(=O)(=O)CCCC(=O)N[C@@H](Cc1ccccc1)[C@H](O)CNCc2cccc(OC)c2	CHEMBL252962	7950
CC(C)CNC(=O)[C@H](C)C[C@H](O)[C@H](CC(C)C)NC(=O)[C@H](Cc1ccccc1)NC(=O)c2ccc3OCOc3c2	CHEMBL1088138	8070
CCCC1C(=C(C)N(C(=C1C(=O)N[C@@H](Cc2ccccc2)[C@H](O)CNC3CC3)C)S(=O)(=O)C)C(=O)NOCc4ccccc4	CHEMBL1163401	8100
CC(=O)Nc1ccc(CN2CCC3(CC2)N(C(=O)N=C3NC4CCCCC4)c5cccc(F)c5)cc1	CHEMBL495087	8200
NC1=NC(C2=NCCCN12)(c3ccccc3)c4cccc(Cc5ccc(F)cc5)c4	CHEMBL567653	8200
Oc1ccc(cc1)C2=CC(=O)c3ccccc3C2=O	CHEMBL1762553	8220
NC(=NC(=O)Cc1c(csc1c2ccccc2)c3ccccc3)N	CHEMBL236850	8300
COc1cc(O)ccc1[C@@H]2CC(=O)c3c(O)cc(O)c(C[C@@H](CC=C(C)C)C(=C)C)c3O2	CHEMBL453642	8400
CC(C)Oc1cccc(CN[C@H]2CS(=O)(=O)C[C@@H](Cc3ccc(O)c(Br)c3)[C@@H]2O)c1	CHEMBL1760866	8500
Oc1cc(O)c(Oc2cc(O)c3Oc4c(Oc5cc(O)cc(O)c5)c(O)cc(O)c4Oc3c2)c(O)c1	CHEMBL456228	8590
Oc1cccc2C(=O)C=C(C(=O)c12)c3ccccc3	CHEMBL1762557	8980
CC(C)[C@H](NC(=O)C[C@H](O)[C@H](CC1CCCCC1)NC(=O)C[C@H](O)[C@H](Cc2ccccc2)NC(=O)CNC(=O)C)C(=O)NCc3ccc(cc3)C(=O)O	CHEMBL114147	9000
CC(C)OC(=O)CN1C(=C(C(C)C(=C1C)C(=O)N[C@@H](Cc2ccccc2)[C@H](O)CNC3CC3)C(=O)NOCc4ccccc4)C	CHEMBL1165427	9000
COc1ccc(cc1)c2cc(O)cc(c2O)c3ccccc3	CHEMBL1762684	9100
Nc1ncccc1NCc2cccc(c2)c3ccc4cc[nH]c4c3	CHEMBL220896	9100
CC(=O)N[C@@H](Cc1cc(F)cc(F)c1)[C@H](O)CN[C@@]2(CC[C@H](O)CC2)c3cccc(c3)C(C)(C)C	CHEMBL569390	9200
O=C1C=C(C(=O)c2ccccc12)c3ccccc3	CHEMBL1762552	9330
CC(=O)N[C@@H](Cc1cc(F)cc(F)c1)[C@H](O)CNC2(CC2)c3nc(CC(C)(C)C)cs3	CHEMBL1257893	9360
CC(C)C[C@H](NC(=O)[C@H](CC(=O)N)NC(=O)[C@@H](NC(=O)[C@@H](N)CCC(=O)O)C(C)C)[C@@H](O)CC(=O)N[C@@H](C(C)C)C(=O)N	CHEMBL137547	9400
CCCCNC(=O)[C@@H](NC(=O)[C@@H]1OCC[C@H]1[C@H](O)[C@H](CC(C)C)NC(=O)[C@H](CCSC)NC(=O)[C@H](CC(C)C)NC(=O)C)C(C)C	CHEMBL364664	9560
C[C@@H](NC(=O)c1cc(cc(c1)c2ccccc2C(=O)C)C(=O)N[C@H](CO)Cc3ccccc3)c4ccccc4	CHEMBL252351	9900
CN(C)c1cccc(CNC[C@@H](O)[C@H](Cc2ccccc2)NC(=O)[C@@H]3CN(Cc4ccc(F)cc4F)C(=O)N3)c1	CHEMBL265953	9950
Brc1ccc(N2CCOCC2)c(NC(=O)C3=Cc4ccccc4OC3=O)c1	CHEMBL212873	10000
C[C@@H](NC(=O)c1cc(cc(c1)C(=O)N[C@@H](Cc2ccccc2)[C@H](O)CNC3CC3)N(C)S(=O)(=O)C)c4ccc(F)cc4	CHEMBL377625	10000
CC(C)(C)OC(=O)N1CCN(CC1)c2ccc(cc2NC(=O)C3=Cc4ccccc4OC3=O)c5ccccc5	CHEMBL210451	10000
CCCN(CCC)C(=O)c1cc(C)cc(c1)C(=O)N[C@@H](Cc2cc(F)cc(F)c2)[C@H](O)[C@H]3CN(CCN3)c4ccccc4	CHEMBL510737	10000
COC(=O)[C@@H]1CC(C[C@@H](C1)C(=O)OC)NC(=O)[C@H](NC(=O)C[C@H](O)[C@@H](Cc2cc(F)cc(F)c2)NC(=O)C(O)c3ccccc3c4ccccc4)C(C)C	CHEMBL296166	10000
COC(=O)[C@@H]1CC(C[C@@H](C1)C(=O)OC)NC(=O)[C@H](NC(=O)C[C@H](O)C(CC(C)C)NC(=O)[C@H](CCSC)NC(=O)[C@@H](NC(=O)OC(C)(C)C)C(C)C)C(C)C	CHEMBL33417	10000
COC(=O)[C@@H]1CCCN1C(=O)[C@@H](Cc2ccccc2)N(C)C(=O)[C@H](C)NC(=O)[C@@H](NC(=O)C[C@H](O)[C@H](CC(C)C)NC(=O)[C@H](CC(=O)N)NC(=O)[C@H](CC(C)C)NC(=O)[C@H](OC(=O)[C@@H](OC(=O)[C@H](C(C)C)N(C)C)C(C)C)C(C)C)[C@@H](C)O	CHEMBL567893	10000
COc1cccc2C=C(C(=O)Nc3cc(Br)ccc3N4CCOCC4)C(=O)Oc12	CHEMBL379100	10000
CSCC[C@H](NC(=O)[C@@H](NC(=O)OC(C)(C)C)C(C)C)C(=O)N[C@@H](COCc1cc(F)cc(F)c1)[C@@H](O)C[C@@H](C)C(=O)N[C@@H](C(C)C)C(=O)NCc2ccccc2	CHEMBL1076907	10000

## Sheet: S3E
Table S3E: Number of molecules after each filtration for the databases and filtering conditions
1. Selection of 3224 molecules from the screened databases:					see Tables S4E-S8E
Database:	Enamine	DrugBank-Approved	DrugBank-Experimental	ChemDiv	Natural Products				Model no	Target	Type	Index for model
condition1	36394	107	136	38171	8422				1	AChE	actives vs randoms	I1
condition2	665	33	46	1805	675	3224	SUM		4	AChE	high- vs low- actives	I4
where									5	AChE	high- vs low- actives	I5
condition1 = I1> 0									2	BACE-1	actives vs randoms	I2
condition2 = AND (I4 OR I5 > 0, I2 > 0, I8 > 0)									8	BACE-1	high- vs low- actives	I8
condition2 (For DrugBank) = I2 > 0
2. Selection of 685 from 3224:			see Table S9E
OR (condition 3, condition 4, condition 5)
where
condition3	AND (I1 > 0.5, I2 > 0.5, I8 > 0)
condition4	AND (I4 OR I5 > 0.5, I8 > 0.5)
condition5	SUM (I1 + I2 + 0.3*(I4 OR I5, the largest) +0.7* I8) > 1.5

## Sheet: S4E
Table S4E: 665 molecules from Enamine and their indexes for models 1,4,5 (AChE models) and models 2,8 (BACE-1 models)
NAME	Index_ACHE1	Index_ACHE4	Index_ACHE5	Index_BACE2	Index_BACE8	Condition		Condition
T0510-9571	0.639	0.18	0.057	0.139	0.638	1		IF(AND(B2>0,(OR(C2>0,D2>0)),E2>0,F2>0),1,0)
T0512-6374	0.852	0.217	0.107	0.181	0.541	1		AChE index model 1 > 0
T0516-8134	0.004	-0.258	0.056	0.18	0.371	1
T0517-1304	0.826	0.357	0.178	0.173	0.587	1
T0518-6806	0.39	0.249	-0.007	0.046	0.483	1
T0518-7080	0.824	0.129	0.057	0.042	0.271	1
T0518-7468	0.492	0.445	0.163	0.181	0.541	1
T0519-3663	0.11	0.561	0.57	0.206	0.128	1		Color code:	AChE model 1	AChE model 4	AChE model 5	BACE1 model 2	BACE1 model 8
T0520-0001	0.459	0.338	0.109	0.042	0.226	1			index>0.5	index>0.5	index>0.5	index>0.5	index>0.5
T0520-4715	0.525	0.085	0.238	0.846	0.152	1			0<index<0.5	0<index<0.5	0<index<0.5	0<index<0.5	0<index<0.5
T0520-5898	0.514	0.146	-0.217	0.157	0.156	1
T0520-6091	0.852	0.009	-0.147	0.206	0.528	1
T5210741	0.514	0.057	0.136	0.115	0.122	1
T5211146	0.852	0.562	0.618	0.181	0.021	1
T5215069	0.826	0.211	0.06	0.444	0.052	1
T5232202	0.852	0.354	0.328	0.206	0.745	1
T5248865	0.852	0.387	0.266	0.115	0.001	1
T5293433	0.308	0.055	-0.26	0.13	0.402	1
T5293458	0.308	0.056	-0.244	0.139	0.402	1
T5297141	0.622	0.037	-0.176	0.755	0.077	1
T5301714	0.875	0.609	0.631	0.179	0.039	1
T5309539	0.773	0.075	0.211	0.181	0.372	1
T5310759	0.875	0.258	0.076	0.157	0.004	1
T5310877	0.75	0.352	0.24	0.173	0.395	1
T5313903	0.533	0.08	-0.034	0.181	0.238	1
T5317128	0.334	0.069	-0.036	0.181	0.306	1
T5324893	0.417	0.015	-0.415	0.846	0.395	1
T5326200	0.087	0.43	0.182	0.046	0.301	1
T5335790	0.449	-0.028	0.209	0.029	0.265	1
T5338610	0.474	0.223	0.04	0.252	0.366	1
T5339318	0.799	0.16	0.281	0.054	0.205	1
T5341030	0.39	0.664	0.675	0.181	0.404	1
T5345474	0.601	0.184	0.203	0.181	0.463	1
T5358254	0.496	0.277	0.163	0.179	0.224	1
T5374026	0.056	0.146	0.007	0.181	0.322	1
T5377302	0.423	-0.049	0.153	0.831	0.796	1
T5391558	0.729	0.127	-0.329	0.813	0.298	1
T5393246	0.673	0.245	0.037	0.205	0.694	1
T5407137	0.687	0.108	-0.103	0.084	0.532	1
T5408312	0.875	0.159	0.091	0.604	0.59	1
T5415603	0.464	0.117	-0.065	0.181	0.223	1
T5439003	0.079	0.176	-0.084	0.071	0.146	1
T5443048	0.44	0.301	0.139	0.136	0.365	1
T5448204	0.539	0.07	-0.141	0.181	0.238	1
T5459211	0.139	-0.084	0.108	0.413	0.254	1
T5459281	0.464	0.211	0.023	0.181	0.38	1
T5459348	0.308	0.003	-0.262	0.139	0.4	1
T5461280	0.334	0.073	-0.241	0.139	0.425	1
T5465394	0.799	0.424	0.266	0.131	0.122	1
T5467081	0.02	0.174	-0.202	0.396	0.535	1
T5467864	0.029	0.099	-0.319	0.198	0.652	1
T5468497	0.334	0.356	0.095	0.181	0.442	1
T5470937	0.308	0.184	0.001	0.131	0.403	1
T5472030	0.206	0.07	-0.026	0.139	0.522	1
T5475923	0.103	-0.19	0.019	0.83	0.128	1
T5477385	0.773	0.267	0.183	0.813	0.624	1
T5487923	0.119	0.289	0.232	0.178	0.587	1
T5488927	0.492	0.105	0.097	0.07	0.276	1
T5488931	0.464	0.109	-0.055	0.181	0.238	1
T5488932	0.848	0.101	0.137	0.846	0.423	1
T5488933	0.848	0.29	0.399	0.846	0.423	1
T5489025	0.171	-0.264	0.189	0.181	0.473	1
T5491373	0.673	0.275	0.048	0.205	0.694	1
T5495781	0.492	0.223	-0.109	0.181	0.512	1
T5497778	0.848	0.284	0.184	0.822	0.621	1
T5498116	0.334	0.283	0.046	0.181	0.442	1
T5498136	0.622	0.091	0.158	0.09	0.569	1
T5498965	0.043	0.148	-0.151	0.124	0.608	1
T5502843	0.492	-0.07	0.077	0.07	0.331	1
T5502859	0.177	0.237	-0.101	0.347	0.279	1
T5505813	0.464	0.175	0.2	0.181	0.063	1
T5509272	0.263	0.271	-0.02	0.037	0.196	1
T5519516	0.375	0.085	0.102	0.18	0.004	1
T5521209	0.75	0.501	0.439	0.115	0.01	1
T5522582	0.056	0.158	0.012	0.086	0.36	1
T5523973	0.773	0.038	-0.019	0.18	0.544	1
T5527973	0.777	0.258	0.087	0.206	0.491	1
T5532169	0.85	-0.029	0.083	0.205	0.017	1
T5532364	0.777	0.427	0.264	0.181	0.037	1
T5533295	0.777	0.499	0.453	0.164	0.148	1
T5534201	0.334	0.356	0.095	0.046	0.455	1
T5537922	0.875	0.585	0.477	0.456	0.314	1
T5542012	0.413	0.27	0.261	0.139	0.233	1
T5542640	0.75	0.139	0.458	0.206	0.099	1
T5542785	0.219	0.616	0.38	0.181	0.393	1
T5543026	0.192	0.114	-0.135	0.045	0.03	1
T5547205	0.017	0.345	0.139	0.547	0.322	1
T5548395	0.639	0.658	0.574	0.571	0.151	1
T5548983	0.767	0.78	0.595	0.176	0.253	1
T5549591	0.875	0.513	0.354	0.566	0.252	1
T5549652	0.875	0.782	0.71	0.181	0.39	1
T5550976	0.875	0.492	0.279	0.157	0.373	1
T5553101	0.464	0.042	-0.217	0.181	0.351	1
T5556167	0.464	0.028	0.015	0.181	0.348	1
T5556211	0.773	0.312	0.106	0.197	0.309	1
T5557819	0.75	0.303	0.185	0.009	0.309	1
T5558636	0.826	0.113	0.175	0.157	0.192	1
T5561168	0.396	0.253	-0.107	0.083	0.208	1
T5562763	0.021	-0.064	0.028	0.157	0.431	1
T5564532	0.396	0.262	0.121	0.083	0.384	1
T5566363	0.413	0.008	-0.11	0.041	0.255	1
T5566838	0.464	0.216	0.201	0.181	0.221	1
T5567550	0.219	0.759	0.355	0.093	0.007	1
T5567624	0.263	0.11	0.033	0.169	0.243	1
T5569283	0.413	0.243	0.103	0.181	0.183	1
T5569786	0.108	0.422	0.037	0.072	0.44	1
T5569815	0.016	0.266	-0.056	0.032	0.317	1
T5569824	0.219	0.708	0.239	0.119	0.332	1
T5570011	0.119	0.104	-0.045	0.181	0.231	1
T5570272	0.773	-0.222	0.003	0.205	0.327	1
T5570877	0.019	-0.11	0.061	0.313	0.207	1
T5571239	0.514	0.709	0.72	0.181	0.199	1
T5571247	0.762	0.103	0.2	0.469	0.35	1
T5571351	0.875	-0.218	0.172	0.206	0.071	1
T5577762	0.421	0.509	0.484	0.181	0.224	1
T5577803	0.167	0.095	0.176	0.418	0.312	1
T5578313	0.492	0.496	0.524	0.456	0.332	1
T5579341	0.492	0.328	0.197	0.414	0.307	1
T5580342	0.056	-0.017	0.024	0.413	0.573	1
T5582134	0.408	0.094	0.297	0.042	0.082	1
T5583351	0.2	0.08	0.003	0.181	0.541	1
T5583927	0.492	0.765	0.529	0.456	0.038	1
T5591139	0.75	0.155	0.059	0.18	0.262	1
T5591421	0.272	0.132	0.215	0.439	0.405	1
T5592295	0.492	0.3	0.188	0.414	0.334	1
T5592296	0.492	0.328	0.197	0.414	0.405	1
T5592297	0.492	0.328	0.197	0.343	0.295	1
T5592298	0.239	0.357	0.142	0.006	0.265	1
T5592789	0.773	0.105	0.157	0.042	0.307	1
T5593854	0.701	-0.054	0.348	0.206	0.521	1
T5594416	0.691	0.457	0.287	0.103	0.145	1
T5594880	0.203	0.364	0.248	0.389	0.005	1
T5599039	0.003	0.414	-0.038	0.153	0.414	1
T5599615	0.003	0.237	-0.095	0.189	0.299	1
T5603156	0.314	0.126	-0.203	0.298	0.469	1
T5603697	0.289	0.054	-0.057	0.129	0.36	1
T5605342	0.39	0.261	0.346	0.153	0.565	1
T5605701	0.12	0.695	0.401	0.037	0.333	1
T5610891	0.44	0.069	-0.044	0.396	0.405	1
T5610892	0.514	0.482	0.409	0.181	0.16	1
T5611513	0.599	0.287	0.116	0.25	0.046	1
T5611522	0.875	0.462	0.154	0.006	0.405	1
T5611525	0.514	0.188	0.221	0.181	0.16	1
T5612661	0.75	0.158	0.14	0.205	0.168	1
T5613174	0.361	0.203	-0.04	0.005	0.476	1
T5613305	0.39	0.213	0.214	0.066	0.548	1
T5614965	0.826	0.061	-0.091	0.139	0.021	1
T5615678	0.12	0.403	0.016	0.045	0.333	1
T5615729	0.376	0.021	-0.19	0.293	0.359	1
T5615886	0.019	-0.129	0.059	0.313	0.207	1
T5616984	0.334	0.349	-0.023	0.139	0.402	1
T5617205	0.492	0.689	0.442	0.456	0.334	1
T5618652	0.617	0.668	0.574	0.071	0.192	1
T5622573	0.466	0.2	-0.043	0.705	0.583	1
T5623241	0.184	0.099	-0.216	0.056	0.462	1
T5624450	0.683	0.211	0.198	0.455	0.533	1
T5624756	0.875	0.673	0.487	0.414	0.393	1
T5625480	0.674	0.128	0.24	0.604	0.489	1
T5626145	0.852	0.679	0.667	0.139	0.449	1
T5627388	0.514	0.256	0.19	0.181	0.328	1
T5629089	0.742	0.15	-0.194	0.18	0.541	1
T5629512	0.108	0.113	-0.172	0.032	0.313	1
T5629526	0.492	0.363	-0.215	0.139	0.529	1
T5630297	0.445	0.098	0.075	0.418	0.273	1
T5630523	0.773	-0.094	0.005	0.205	0.004	1
T5630524	0.848	-0.031	0.087	0.205	0.073	1
T5631900	0.875	0.317	0.192	0.18	0.022	1
T5632337	0.852	0.149	-0.041	0.801	0.724	1
T5633319	0.492	0.328	0.27	0.456	0.574	1
T5633451	0.492	0.09	-0.087	0.139	0.309	1
T5634252	0.008	0.232	0.477	0.181	0.141	1
T5637104	0.289	0.748	0.506	0.085	0.539	1
T5639400	0.076	0.011	0.075	0.846	0.366	1
T5640561	0.773	0.387	0.094	0.304	0.355	1
T5642707	0.156	0.113	0.008	0.026	0.023	1
T5643746	0.254	0.156	-0.019	0.128	0.342	1
T5646227	0.625	0.017	0.021	0.046	0.065	1
T5647289	0.464	0.216	0.201	0.181	0.238	1
T5647354	0.417	0.797	0.728	0.181	0.496	1
T5647355	0.417	0.793	0.728	0.042	0.509	1
T5647357	0.643	0.431	0.575	0.181	0.314	1
T5647362	0.799	0.638	0.538	0.151	0.484	1
T5647384	0.087	0.082	-0.058	0.181	0.509	1
T5647392	0.777	0.797	0.769	0.155	0.003	1
T5648355	0.128	0.225	0.177	0.396	0.625	1
T5653954	0.773	0.282	0.24	0.206	0.049	1
T5654818	0.509	0.308	0.18	0.387	0.523	1
T5654868	0.145	0.364	0.166	0.389	0.005	1
T5657301	0.265	0.224	0.058	0.157	0.119	1
T5659022	0.875	0.35	0.721	0.181	0.39	1
T5660765	0.622	0.079	-0.033	0.151	0.505	1
T5663103	0.076	0.186	0.208	0.181	0.262	1
T5667080	0.514	0.016	0.011	0.179	0.224	1
T5667826	0.074	0.258	0.403	0.181	0.335	1
T5669501	0.118	0.248	0.365	0.081	0.13	1
T5669838	0.514	0.235	-0.016	0.181	0.364	1
T5671936	0.773	0.278	0.117	0.087	0.426	1
T5672600	0.674	-0.016	0.013	0.054	0.522	1
T5674469	0.128	0.02	0.296	0.084	0.176	1
T5675131	0.076	0.245	0.14	0.785	0.763	1
T5675629	0.848	-0.043	0.002	0.39	0.434	1
T5677256	0.258	0.216	0.179	0.136	0.233	1
T5678179	0.499	0.239	0.291	0.181	0.505	1
T5679685	0.875	0.317	0.17	0.18	0.022	1
T5683740	0.449	0.159	0.179	0.181	0.25	1
T5683912	0.773	0.404	0.228	0.784	0.161	1
T5687968	0.875	0.17	0.236	0.18	0.022	1
T5687969	0.729	-0.465	0.007	0.18	0.022	1
T5688505	0.639	0.211	0.208	0.798	0.533	1
T5694712	0.437	0.028	-0.242	0.005	0.137	1
T5694925	0.585	0.103	0.018	0.063	0.375	1
T5695646	0.464	0.414	0.176	0.181	0.422	1
T5696303	0.263	0.09	0.063	0.18	0.439	1
T5698547	0.617	0.077	-0.12	0.845	0.407	1
T5699690	0.499	0.634	0.617	0.181	0.505	1
T5700196	0.773	0.312	0.072	0.197	0.137	1
T5703536	0.2	0.303	0.177	0.18	0.442	1
T5715661	0.622	0.082	-0.242	0.787	0.405	1
T5716500	0.701	-0.217	0.023	0.206	0.525	1
T5717272	0.352	0.191	0.04	0.089	0.061	1
T5717679	0.848	-0.065	0.073	0.164	0.199	1
T5718463	0.599	0.104	-0.064	0.116	0.8	1
T5720279	0.079	0.031	-0.343	0.181	0.399	1
T5721439	0.425	0.106	-0.181	0.206	0.149	1
T5726954	0.464	0.162	0.021	0.181	0.358	1
T5731730	0.799	0.35	0.712	0.181	0.372	1
T5734377	0.499	0.435	0.292	0.181	0.485	1
T5736832	0.464	0.448	0.346	0.488	0.461	1
T5738264	0.875	0.797	0.714	0.181	0.423	1
T5741609	0.875	0.317	0.192	0.18	0.022	1
T5742158	0.525	-0.005	0.043	0.846	0.192	1
T5744134	0.674	0.098	0.019	0.828	0.135	1
T5744160	0.674	0.384	0.352	0.829	0.135	1
T5748463	0.777	0.222	0.159	0.056	0.42	1
T5748482	0.631	0.676	0.487	0.354	0.305	1
T5748487	0.799	0.307	-0.005	0.164	0.462	1
T5748488	0.75	0.211	0.109	0.069	0.065	1
T5749104	0.392	0.271	0.058	0.087	0.3	1
T5749285	0.312	0.731	0.699	0.286	0.162	1
T5751399	0.488	0.104	0.224	0.179	0.328	1
T5752330	0.423	0.064	-0.021	0.181	0.788	1
T5752854	0.449	0.019	0.143	0.206	0.791	1
T5754332	0.44	0.35	0.362	0.603	0.369	1
T5757743	0.773	0.084	0.032	0.139	0.253	1
T5758315	0.449	0.241	0.019	0.119	0.84	1
T5758550	0.875	0.576	0.469	0.179	0.546	1
T5758574	0.777	0.728	0.776	0.124	0.038	1
T5758591	0.773	0.045	0.002	0.205	0.791	1
T5760508	0.701	0.532	0.571	0.139	0.622	1
T5761741	0.238	0.155	0.232	0.115	0.236	1
T5765404	0.674	0.099	0.081	0.205	0.21	1
T5767844	0.332	0.699	0.586	0.488	0.393	1
T5772456	0.773	0.275	0.075	0.206	0.31	1
T5772564	0.852	-0.031	0.087	0.181	0.325	1
T5772714	0.063	-0.05	0.083	0.181	0.398	1
T5773553	0.265	0.142	0.049	0.157	0.119	1
T5774735	0.12	-0.212	0.056	0.181	0.073	1
T5774839	0.826	0.121	0.037	0.206	0.785	1
T5775234	0.622	0.119	0.006	0.083	0.583	1
T5775236	0.773	0.124	0.028	0.173	0.583	1
T5776071	0.376	0.251	0.319	0.413	0.224	1
T5776725	0.773	0.019	-0.091	0.197	0.183	1
T5779549	0.723	0.112	-0.063	0.124	0.459	1
T5781808	0.437	0.423	0.275	0.018	0.382	1
T5781905	0.437	0.111	0.249	0.018	0.382	1
T5782102	0.701	0.115	0.106	0.11	0.273	1
T5784582	0.334	0.202	0.2	0.181	0.048	1
T5786067	0.21	0.23	-0.334	0.139	0.294	1
T5786587	0.35	0.115	0	0.129	0.174	1
T5787050	0.666	0.36	0.172	0.445	0.05	1
T5788031	0.875	0.442	0.432	0.181	0.504	1
T5788235	0.852	0.155	0.357	0.181	0.309	1
T5789934	0.499	0.191	0.325	0.181	0.008	1
T5790303	0.464	0.073	0.067	0.181	0.223	1
T5791568	0.848	0.453	0.441	0.846	0.021	1
T5793461	0.041	-0.015	0.041	0.004	0.623	1
T5794658	0.777	0.797	0.776	0.181	0.02	1
T5796467	0.875	0.779	0.72	0.197	0.121	1
T5797189	0.464	0.495	0.721	0.157	0.215	1
T5804562	0.184	0.616	0.019	0.139	0.477	1
T5804930	0.369	0.174	0.216	0.181	0.507	1
T5805040	0.514	0.768	0.576	0.181	0.199	1
T5809134	0.84	0.418	0.26	0.432	0.442	1
T5809139	0.464	0.246	0.062	0.205	0.146	1
T5810584	0.499	0.24	0.281	0.138	0.005	1
T5812367	0.759	0.13	0.133	0.01	0.567	1
T5815144	0.875	0.343	0.215	0.181	0.53	1
T5816256	0.84	0.057	-0.047	0.766	0.078	1
T5821935	0.674	0.346	0.505	0.041	0.24	1
T5823909	0.431	0.05	-0.061	0.181	0.671	1
T5827281	0.404	0.279	0.09	0.204	0.079	1
T5827360	0.013	0.085	-0.057	0.414	0.319	1
T5833596	0.875	0.164	0.176	0.206	0.577	1
T5834926	0.776	0.24	0.468	0.181	0.074	1
T5835575	0.701	-0.019	0.122	0.181	0.058	1
T5836597	0.776	0.22	0.506	0.181	0.068	1
T5838346	0.31	0.144	-0.156	0.181	0.381	1
T5838537	0.875	0.471	0.426	0.182	0.646	1
T5838672	0.413	0.349	0.352	0.181	0.313	1
T5842326	0.525	0.278	-0.082	0.801	0.743	1
T5843880	0.452	0.013	-0.1	0.386	0.366	1
T5846915	0.773	0.601	0.407	0.829	0.096	1
T5848973	0.281	0.323	0.121	0.181	0.244	1
T5849802	0.439	0.073	0.031	0.206	0.023	1
T5853939	0.777	0.323	0.346	0.124	0.402	1
T5857952	0.492	0.334	-0.032	0.139	0.523	1
T5862047	0.701	0.261	0.564	0.206	0.489	1
T5864624	0.277	0.122	0.014	0.431	0.041	1
T5866904	0.391	0.195	0.047	0.181	0.402	1
T5872760	0.308	0.056	-0.219	0.181	0.387	1
T5874709	0.251	0.316	0.115	0.111	0.313	1
T5876380	0.765	0.154	0.15	0.83	0.169	1
T5878570	0.398	0.333	0.392	0.181	0.67	1
T5879048	0.777	0.162	-0.049	0.119	0.668	1
T5879945	0.334	0.301	0.073	0.181	0.369	1
T5882605	0.334	0.414	0.204	0.181	0.404	1
T5883413	0.701	0.115	0.042	0.11	0.277	1
T5884054	0.492	0.331	0.008	0.181	0.556	1
T5885168	0.108	0.507	0.258	0.047	0.59	1
T5885817	0.158	0.111	0.083	0.181	0.518	1
T5887106	0.22	0.217	0.266	0.26	0.194	1
T5887364	0.465	0.175	-0.131	0.206	0.405	1
T5887399	0.513	0.212	0.162	0.181	0.39	1
T5887538	0.464	0.269	0.03	0.181	0.223	1
T5888384	0.449	0.086	0.115	0.18	0.004	1
T5888656	0.398	0.267	-0.065	0.164	0.262	1
T5893988	0.683	0.032	0.042	0.481	0.791	1
T5894228	0.627	-0.145	0.08	0.181	0.42	1
T5895384	0.082	0.687	0.312	0.029	0.069	1
T5901113	0.701	0.528	0.527	0.604	0.509	1
T5902104	0.773	0.078	0.204	0.13	0.569	1
T5903500	0.334	0.069	-0.037	0.021	0.229	1
T5903534	0.137	0.208	-0.013	0.155	0.199	1
T5904037	0.464	0.015	-0.075	0.181	0.381	1
T5905775	0.464	0.246	0.071	0.205	0.146	1
T5907879	0.848	0.716	0.695	0.208	0.011	1
T5909337	0.263	0.18	-0.092	0.128	0.022	1
T5918163	0.423	0.045	-0.082	0.112	0.61	1
T5921565	0.465	0.134	-0.14	0.381	0.473	1
T5921580	0.108	0.484	0.112	0.508	0.53	1
T5922647	0.193	0.469	0.207	0.333	0.148	1
T5928782	0.701	0.277	0.276	0.159	0.224	1
T5932927	0.617	0.324	0.22	0.094	0.557	1
T5935752	0.48	0.115	0.029	0.205	0.146	1
T5936579	0.617	0.349	0.362	0.046	0.529	1
T5936587	0.777	0.783	0.596	0.443	0.38	1
T5939827	0.848	0.716	0.704	0.463	0.015	1
T5939950	0.765	0.426	0.346	0.014	0.455	1
T5945881	0.2	0.267	0.094	0.18	0.06	1
T5948225	0.046	0.237	0.082	0.431	0.398	1
T5951856	0.848	0.52	0.311	0.829	0.183	1
T5951901	0.525	0.098	-0.196	0.742	0.103	1
T5954345	0.826	0.063	-0.049	0.18	0.022	1
T5955859	0.074	0.126	0.034	0.506	0.238	1
T5957522	0.799	0.767	0.787	0.018	0.043	1
T5957988	0.875	0.51	0.551	0.067	0.211	1
T5958356	0.627	-0.145	0.015	0.055	0.037	1
T5959834	0.218	-0.027	0.241	0.181	0.3	1
T5960919	0.369	0.007	0	0.846	0.421	1
T5963528	0.22	0.18	-0.102	0.204	0.135	1
T5963969	0.525	0.134	0.171	0.161	0.41	1
T5964466	0.396	0.057	0.135	0.181	0.353	1
T5970244	0.639	0.23	0.164	0.18	0.343	1
T5970690	0.445	0.321	0.174	0.181	0.449	1
T5971361	0.308	0.197	0.15	0.13	0.211	1
T5978969	0.799	0.172	0.699	0.179	0.367	1
T5980448	0.848	0.446	0.372	0.256	0.021	1
T5980474	0.402	0.216	0.179	0.181	0.213	1
T5980486	0.75	0.071	-0.125	0.181	0.52	1
T5981103	0.799	0.684	0.557	0.159	0.254	1
T5981768	0.773	-0.1	0.152	0.846	0.405	1
T5983606	0.781	0.307	0.129	0.164	0.499	1
T5983743	0.048	0.018	0.16	0.004	0.013	1
T5985219	0.48	0.279	0.073	0.204	0.039	1
T5986078	0.773	0.282	0.216	0.177	0.022	1
T5988292	0.643	0.594	0.462	0.401	0.601	1
T5989419	0.848	-0.105	0.014	0.577	0.635	1
T5993532	0.1	0.074	0.114	0.548	0.627	1
T5998240	0.848	0.397	0.423	0.58	0.543	1
T5998331	0.308	0.3	0.18	0.174	0.269	1
T5998618	0.799	0.368	0.732	0.179	0.372	1
T5998832	0.875	0.339	0.288	0.179	0.53	1
T5998942	0.308	0.3	0.18	0.174	0.269	1
T5999781	0.875	0.313	0.148	0.178	0.022	1
T6000446	0.848	0.441	0.302	0.58	0.619	1
T6001668	0.848	-0.1	0.014	0.58	0.397	1
T6001868	0.826	0.032	0.068	0.18	0.289	1
T6006736	0.21	0.012	-0.423	0.139	0.346	1
T6008283	0.11	0	0.192	0.041	0.241	1
T6009657	0.773	-0.1	0.014	0.846	0.405	1
T6013365	0.36	0.274	0.218	0.046	0.29	1
T6013641	0.062	-0.005	0.079	0.469	0.235	1
T6015672	0.848	-0.105	0.014	0.577	0.413	1
T6016355	0.799	0.652	0.73	0.179	0.372	1
T6017286	0.649	0.206	-0.049	0.205	0.492	1
T6023561	0.283	0.507	0.353	0.204	0.645	1
T6025774	0.826	0.037	0.119	0.153	0.341	1
T6030595	0.334	0.414	0.203	0.181	0.436	1
T6037029	0.44	-0.059	0.147	0.134	0.383	1
T6044372	0.75	0.382	0.362	0.114	0.297	1
T6044700	0.75	0.162	0.198	0.066	0.062	1
T6047663	0.437	0.359	0.18	0.181	0.449	1
T6047857	0.599	-0.034	0.02	0.21	0.011	1
T6049931	0.464	0.414	0.204	0.174	0.404	1
T6054497	0.848	-0.105	0.014	0.577	0.413	1
T6054600	0.776	-0.074	0.104	0.18	0.065	1
T6055318	0.639	0.078	0.102	0.203	0.355	1
T6062007	0.607	-0.01	0.152	0.039	0.395	1
T6064283	0.464	0.071	-0.036	0.087	0.187	1
T6068397	0.777	0.417	0.597	0.181	0.196	1
T6071657	0.773	0.303	0.186	0.132	0.554	1
T6071807	0.773	0.324	0.328	0.179	0.022	1
T6073449	0.413	0.508	0.48	0.034	0.273	1
T6077049	0.121	0.184	0.064	0.155	0.376	1
T6079032	0.334	0.414	0.204	0.174	0.261	1
T6080029	0.417	0.511	0.492	0.181	0.3	1
T6080101	0.314	-0.125	0.106	0.139	0.204	1
T6082018	0.423	0.025	-0.011	0.814	0.154	1
T6088891	0.464	0.072	0.051	0.181	0.201	1
T6089363	0.464	0.002	-0.012	0.181	0.187	1
T6091449	0.773	0.498	0.267	0.046	0.393	1
T6093764	0.466	0.2	0.035	0.705	0.583	1
T6094545	0.75	0.275	0.07	0.138	0.008	1
T6098882	0.488	0.32	0.176	0.133	0.355	1
T6107794	0.22	0.079	0.048	0.204	0.574	1
T6108112	0.523	0.116	0.117	0.125	0.416	1
T6108139	0.875	0.324	0.273	0.822	0.046	1
T6110291	0.555	-0.071	0.101	0.042	0.345	1
T6112327	0.759	0.158	-0.105	0.112	0.173	1
T6117350	0.773	0.032	0.003	0.204	0.062	1
T6117706	0.652	0.392	0.182	0.535	0.549	1
T6121262	0.464	0.216	0.192	0.181	0.221	1
T6123837	0.439	0.08	-0.013	0.322	0.448	1
T6127976	0.398	0.267	-0.102	0.071	0.291	1
T6128017	0.219	0.602	0.157	0.119	0.371	1
T6132268	0.334	0.414	0.204	0.174	0.261	1
T6136050	0.773	0.158	-0.105	0.293	0.431	1
T6137019	0.263	0.393	0.348	0.181	0.253	1
T6139146	0.773	0.084	0.006	0.185	0.327	1
T6141556	0.817	0.206	-0.033	0.206	0.492	1
T6141649	0.464	0.071	0.164	0.181	0.187	1
T6143589	0.799	0.187	0.115	0.461	0.363	1
T6144305	0.171	0.107	0.043	0.009	0.477	1
T6145849	0.601	0.475	0.257	0.115	0.043	1
T6146134	0.773	0.363	0.361	0.173	0.53	1
T6149061	0.239	0.188	0.346	0.775	0.078	1
T6153817	0.198	0.009	-0.152	0.054	0.004	1
T6162922	0.261	0.207	0.084	0.387	0.384	1
T6165917	0.056	0.658	0.618	0.758	0.661	1
T6171326	0.799	0.299	0.05	0.181	0.507	1
T6171815	0.875	0.324	0.273	0.822	0.046	1
T6182104	0.852	0.337	0.305	0.094	0.008	1
T6182544	0.119	0.086	0.034	0.128	0.539	1
T6182597	0.056	0.157	-0.002	0.18	0.569	1
T6183124	0.799	0.299	0.079	0.181	0.021	1
T6183356	0.263	0.486	0.389	0.181	0.389	1
T6183397	0.119	0.085	0.031	0.128	0.025	1
T6188394	0.334	0.173	-0.04	0.181	0.442	1
T6191455	0.078	0.049	-0.433	0.123	0.22	1
T6193862	0.39	-0.015	0.017	0.009	0.328	1
T6194182	0.423	0.045	-0.082	0.206	0.766	1
T6205052	0.773	0.54	0.422	0.139	0.077	1
T6208132	0.2	0.149	0.132	0.18	0.322	1
T6208181	0.2	0.158	0.016	0.18	0.389	1
T6219106	0.826	0.393	0.436	0.114	0.025	1
T6224975	0.465	0.093	0.055	0.456	0.574	1
T6228460	0.439	0.137	0.155	0.524	0.676	1
T6229272	0.848	0.186	0.003	0.13	0.167	1
T6230468	0.781	0.46	0.367	0.181	0.529	1
T6233618	0.439	0.097	-0.039	0.206	0.686	1
T6242395	0.308	0.417	0.66	0.181	0.328	1
T6247889	0.39	0.309	0.146	0.181	0.408	1
T6257400	0.773	0.11	-0.024	0.18	0.601	1
T6258394	0.488	0.134	-0.028	0.21	0.213	1
T6261146	0.836	0.114	0.403	0.137	0.366	1
T6267800	0.775	0.186	-0.08	0.179	0.541	1
T6267880	0.75	0.682	0.653	0.042	0.596	1
T6273621	0.056	0.1	-0.025	0.135	0.031	1
T6274395	0.11	-0.368	0.072	0.01	0.481	1
T6278382	0.413	0.004	-0.119	0.181	0.22	1
T6280269	0.622	0.088	0.071	0.125	0.41	1
T6283569	0.848	0.094	-0.129	0.202	0.093	1
T6285867	0.488	0.188	0.022	0.246	0.37	1
T6288065	0.466	0.04	0.071	0.121	0.196	1
T6289140	0.164	0.434	0.181	0.103	0.42	1
T6289659	0.622	-0.055	0.005	0.15	0.668	1
T6290245	0.076	0.498	0.385	0.139	0.51	1
T6295509	0.509	0.221	0.042	0.399	0.207	1
T6301671	0.009	0.256	0.018	0.488	0.668	1
T6303407	0.683	0.219	0.339	0.28	0.56	1
T6307111	0.286	0.299	0.332	0.091	0.563	1
T6307510	0.848	0.54	0.47	0.199	0.645	1
T6307828	0.402	0.146	0.059	0.181	0.263	1
T6308371	0.492	0.3	-0.019	0.181	0.358	1
T6309150	0.75	0.331	0.326	0.042	0.476	1
T6312313	0.334	0.183	-0.08	0.139	0.44	1
T6314316	0.777	0.504	0.334	0.042	0.366	1
T6314792	0.799	0.586	0.644	0.181	0.505	1
T6314881	0.762	0.141	0.151	0.124	0.315	1
T6321733	0.525	0.378	-0.121	0.161	0.175	1
T6322599	0.852	0.06	0.304	0.181	0.322	1
T6325499	0.076	-0.082	0.123	0.115	0.195	1
T6327138	0.415	0.206	-0.018	0.181	0.328	1
T6327308	0.773	-0.04	0.28	0.205	0.109	1
T6328802	0.777	0.497	0.311	0.139	0.527	1
T6331682	0.523	-0.035	0.013	0.211	0.408	1
T6331914	0.104	0.014	0.056	0.846	0.569	1
T6336717	0.848	0.092	0.065	0.326	0.635	1
T6337175	0.398	0.047	0.321	0.547	0.005	1
T6337886	0.579	0.147	0.022	0.085	0.356	1
T6340522	0.799	0.182	0.003	0.124	0.379	1
T6344952	0.848	0.195	0.268	0.173	0.235	1
T6348740	0.799	0.475	0.415	0.157	0.569	1
T6351944	0.499	0.436	0.271	0.179	0.025	1
T6351964	0.844	0.049	0.046	0.115	0.479	1
T6352782	0.363	0.151	-0.035	0.174	0.037	1
T6359641	0.509	0.002	0.022	0.399	0.207	1
T6361002	0.799	0.729	0.653	0.181	0.09	1
T6365088	0.773	0.073	-0.147	0.205	0.572	1
T6368546	0.45	0.226	-0.027	0.01	0.556	1
T6370745	0.773	0.219	0.249	0.181	0.583	1
T6372688	0.639	0.568	0.554	0.515	0.305	1
T6374234	0.474	0.033	-0.056	0.21	0.257	1
T6376842	0.281	0.341	0.067	0.129	0.579	1
T6384935	0.275	0.373	0.272	0.389	0.362	1
T6389134	0.079	0.004	0.074	0.194	0.001	1
T6390827	0.773	0.02	0.102	0.164	0.668	1
T6390892	0.777	0.207	0.304	0.139	0.306	1
T6391770	0.413	0.153	0.426	0.478	0.256	1
T6392971	0.056	0.015	-0.079	0.18	0.06	1
T6394566	0.75	0.06	-0.044	0.181	0.055	1
T6396286	0.413	0.145	0.174	0.205	0.093	1
T6400419	0.643	0.105	0.16	0.108	0.407	1
T6400770	0.777	-0.056	0.297	0.181	0.297	1
T6405500	0.776	0.181	0.221	0.157	0.082	1
T6406081	0.308	0.017	-0.229	0.139	0.493	1
T6412876	0.674	0.074	0.041	0.173	0.455	1
T6413795	0.817	0.148	-0.063	0.206	0.492	1
T6423983	0.781	0.524	0.469	0.461	0.527	1
T6425577	0.04	0.317	0.32	0.846	0.387	1
T6426163	0.75	0.712	0.692	0.181	0.528	1
T6432167	0.701	0.23	0.232	0.206	0.167	1
T6432876	0.622	0.353	0.226	0.393	0.617	1
T6436886	0.848	0.036	0.135	0.205	0.465	1
T6442563	0.396	0.636	0.504	0.18	0.032	1
T6442788	0.799	0.392	0.34	0.461	0.314	1
T6450378	0.75	0.114	0.129	0.181	0.033	1
T6452099	0.39	0.502	0.494	0.041	0.2	1
T6452804	0.579	0.624	0.599	0.042	0.241	1
T6455089	0.382	0.125	0.192	0.1	0.053	1
T6455361	0.525	0.759	0.642	0.18	0.032	1
T6469971	0.765	0.28	0.198	0.179	0.394	1
T6470028	0.525	0.677	0.254	0.082	0.025	1
T6470836	0.773	0.324	0.331	0.139	0.493	1
T6472881	0.639	0.051	0.181	0.18	0.029	1
T6473413	0.541	0.091	0.109	0.163	0.173	1
T6474162	0.334	0.2	0.006	0.139	0.31	1
T6474759	0.875	0.062	0.306	0.157	0.135	1
T6475380	0.773	0.219	0.448	0.58	0.099	1
T6483355	0.465	0.309	0.069	0.093	0.015	1
T6488321	0.253	0.251	0.094	0.197	0.142	1
T6491153	0.718	0.055	0.032	0.235	0.405	1
T6494277	0.464	0.273	0.055	0.139	0.263	1
T6496862	0.352	0.629	0.594	0.048	0.055	1
T6497717	0.826	0.087	0.35	0.109	0.411	1
T6503302	0.701	0.043	-0.152	0.247	0.783	1
T6511037	0.848	0.176	0.271	0.174	0.038	1
T6515950	0.701	0.043	-0.152	0.247	0.783	1
T6529664	0.848	0.283	0.199	0.422	0.464	1
T6529788	0.214	0.186	0.272	0.179	0.372	1
T6535162	0.1	0.072	0.035	0.134	0.328	1
T6548147	0.773	-0.006	0.016	0.18	0.585	1
T6548210	0.852	0.603	0.61	0.181	0.025	1
T6548269	0.629	-0.035	0.522	0.004	0.457	1
T6548761	0.324	0.637	0.322	0.084	0.048	1
T6548784	0.627	-0.23	0.059	0.181	0.546	1
T6549250	0.799	0.28	0.279	0.58	0.099	1
T6552982	0.284	0.387	0.236	0.046	0.383	1
T6554500	0.408	0.779	0.653	0.456	0.39	1
T6555637	0.707	-0.142	0.027	0.157	0.307	1
T6555860	0.161	0.129	-0.121	0.133	0.41	1
T6555874	0.724	-0.041	0.043	0.456	0.338	1
T6559560	0.599	0.029	0.027	0.21	0.369	1
T6571454	0.875	0.41	0.487	0.181	0.356	1
T6575411	0.308	0.241	0.15	0.174	0.4	1
T6599669	0.701	0.188	0.152	0.168	0.015	1
T6619996	0.773	0.737	0.559	0.064	0.13	1
T6630047	0.49	-0.058	0.08	0.181	0.119	1
T6635280	0.773	0.357	0.266	0.137	0.022	1
T6636107	0.3	0.095	-0.023	0.046	0.537	1
T6643043	0.507	0.545	0.378	0.179	0.002	1
T6644071	0.799	0.524	0.564	0.375	0.443	1
T6645056	0.799	0.457	0.329	0.181	0.581	1
T6660030	0.799	0.797	0.799	0.179	0.025	1
T6671507	0.129	0.008	0.089	0.07	0.105	1
T6673063	0.773	0.036	0.135	0.23	0.15	1
T6673703	0.409	0.769	0.202	0.119	0.222	1
T6681522	0.417	0.31	0.188	0.164	0.312	1
T6681648	0.384	0.164	-0.243	0.041	0.01	1
T6687440	0.344	0.072	-0.224	0.11	0.183	1
T6687950	0.826	0.103	0.083	0.299	0.517	1
T6712002	0.228	0.424	0.346	0.826	0.136	1
T6714677	0.773	0.044	0.111	0.831	0.368	1
T6723269	0.464	0.329	-0.01	0.067	0.112	1
T6728546	0.848	0.269	0.176	0.179	0.374	1
T6736060	0.488	0.32	0.176	0.125	0.355	1
T6736964	0.585	0.074	-0.096	0.066	0.442	1
T6739967	0.139	0.271	0.235	0.113	0.432	1
T6744863	0.622	0.358	0.264	0.133	0.355	1
T6755749	0.408	0.048	0.131	0.181	0.047	1
T6756071	0.022	0.232	0.042	0.181	0.386	1
T6757529	0.523	-0.046	0.024	0.025	0.482	1
T6761205	0.773	0.447	0.387	0.206	0.098	1
T6761281	0.875	0.172	0.541	0.58	0.635	1
T6762696	0.423	0.267	0.251	0.162	0.104	1
T6769894	0.799	0.765	0.599	0.157	0.569	1
T6772510	0.773	0.077	0.072	0.197	0.073	1
T6780212	0.759	0.117	0.019	0.071	0.572	1
T6782389	0.622	0.183	-0.118	0.787	0.497	1
T6782966	0.335	0.279	0.126	0.421	0.473	1
T6786672	0.39	0.292	0.333	0.181	0.021	1
T6811015	0.781	0.454	0.233	0.205	0.06	1
T6820758	0.617	0.283	-0.009	0.711	0.394	1
T6831920	0.683	0.357	0.327	0.13	0.355	1
T6840381	0.499	0.009	-0.093	0.205	0.667	1
T6843773	0.773	0.074	0.033	0.828	0.003	1
T6883721	0.848	-0.134	0.022	0.205	0.645	1
T6900769	0.773	0.269	0.183	0.115	0.504	1
T6901662	0.525	0.35	-0.159	0.801	0.24	1
T6914210	0.337	-0.107	0.047	0.181	0.494	1
T6928530	0.777	-0.018	0.427	0.181	0.086	1
T6950191	0.852	0.626	0.639	0.181	0.053	1
T6950248	0.852	0.545	0.572	0.181	0.596	1
T6950296	0.164	0.09	0.433	0.181	0.053	1
T6963405	0.697	-0.318	0.006	0.299	0.34	1
T6968353	0.137	0.538	0.385	0.179	0.053	1
T6974486	0.697	0.014	-0.042	0.132	0.641	1
T6974507	0.214	0.298	0.174	0.179	0.372	1
T6974528	0.697	0.077	-0.11	0.132	0.641	1
T6976813	0.773	0.139	0.388	0.179	0.525	1
T6976816	0.848	0.014	0.053	0.179	0.601	1
T6991919	0.525	0.429	0.385	0.846	0.681	1
T6993690	0.848	0.079	-0.071	0.179	0.601	1
T6993704	0.773	0.543	0.515	0.179	0.318	1
T6994724	0.514	0.16	-0.189	0.181	0.371	1
T7039214	0.33	0.104	0.043	0.181	0.579	1
T7047405	0.643	0.17	0.068	0.181	0.531	1
T7061410	0.799	0.223	0.024	0.087	0.259	1
T7067799	0.622	0.001	-0.169	0.538	0.071	1
T7076335	0.316	0.034	-0.575	0.15	0.339	1
T7078113	0.776	0.005	0.211	0.206	0.177	1
T7090649	0.622	0.078	0.131	0.133	0.263	1
T7094562	0.349	0.327	0.106	0.156	0.006	1
T7096978	0.826	-0.294	0.023	0.415	0.52	1
T7099959	0.875	0.782	0.718	0.181	0.587	1
T7102472	0.729	0.209	0.561	0.206	0.659	1
T7102481	0.852	0.632	0.703	0.115	0.182	1
T7111464	0.396	0.36	0.435	0.042	0.126	1
T7111999	0.369	0.2	-0.023	0.087	0.308	1
T7112277	0.33	0.104	0.053	0.181	0.033	1
T7112506	0.875	0.001	-0.243	0.181	0.575	1
T7114347	0.617	0.164	0.234	0.138	0.018	1
T7114593	0.705	-0.013	0.177	0.009	0.03	1
T7116048	0.781	0.792	0.751	0.179	0.523	1
Z362114426	0.508	0.307	0.18	0.481	0.384	1

## Sheet: S5E
Table S5E: 1805 molecules from ChemDiv and their indexes for models 1,4,5 (AChE models) and models 2,8 (BACE-1 models)
smiles	NAME	Index_ACHE1	Index_ACHE4	Index_ACHE5	Index_BACE2	Index_BACE8	Condition		Condition
O(C)c1c(cccc1OC)C(=O)N1CC2(Nc3c([NH+]=C2NC2CCCC2)cccc3)CCC1	S019-0833	0.875	0.298	0.201	0.804	0.688	1		IF(AND(F2>0,G2>0,(OR(D2>0,E2>0))),1,0)
O(C)c1cc(OC)ccc1C(=O)N1CC2(Nc3c([NH+]=C2NC2CCCC2)cccc3)CCC1	S019-0834	0.875	0.448	0.206	0.804	0.512	1		AChE index model 1 > 0
O(CC(=O)N1CC2([NH2+]Cc3c([NH+]=C2NC2CCCC2)cccc3)CC1)c1ccccc1C	S029-0936	0.875	0.396	0.121	0.787	0.014	1
O(C)c1ccc(cc1)C(=O)N1CC2([NH2+]Cc3c([NH+]=C2NC2CCCC2)cccc3)CC1	S029-0801	0.875	0.51	0.29	0.535	0.393	1
O1c2c(N(CC(=O)NCC3CC[NH+](CC3)Cc3ccccc3OCC)C(=O)C1CC)cc(cc2)C	K786-5639	0.848	0.717	0.697	0.797	0.052	1
O(C)c1c(cccc1OC)CN1C(Cn2c(cc3c2cc(OC)cc3)C1=O)(C(=O)NCCC[NH+]1CC(CC(C1)C)C)C	E522-0113	0.848	0.392	0.346	0.557	0.382	1
O=C(c1c[nH+]c2c(cc(cc2)CC)c1N1CCC(CC1)C(=O)N)c1cc(C)c(cc1)C	C768-0260	0.848	0.119	0.013	0.529	0.007	1		Color code:	AChE model 1	AChE model 4	AChE model 5	BACE1 model 2	BACE1 model 8
O1c2cc(ccc2OC1)CN1C(Cn2c(cc3c2cc(OC)cc3)C1=O)(C(=O)NCCC[NH+]1CC(CC(C1)C)C)C	E522-0101	0.826	0.394	0.347	0.813	0.501	1			index>0.5	index>0.5	index>0.5	index>0.5	index>0.5
O1c2cc(ccc2OC1)C([NH+]1CCN(CC1)c1ccc(OC)cc1)CNC(=O)c1cc(C)c(cc1)C	G856-4245	0.826	0.132	-0.03	0.812	0.03	1			0<index<0.5	0<index<0.5	0<index<0.5	0<index<0.5	0<index<0.5
O(C)c1ccc(cc1)C1N(C(=O)CCC1C(=O)NCCC[NH+]1CCCCCC1)c1ccc(OC)cc1	C066-0966	0.799	0.337	0.447	0.813	0.196	1
O(C)c1cc(ccc1OC)C1N(C(=O)CCC1C(=O)NCCC[NH+]1CCC(CC1)C)c1ccc(OC)cc1	C125-0124	0.799	0.494	0.454	0.571	0.343	1
O(C)c1c(OC)cc(cc1OC)C(N1Cc2c(cccc2)C1=O)CC(=O)NC1CC[NH+](CC1)Cc1ccccc1	E787-0919	0.799	0.247	0.016	0.571	0.225	1
O(C)c1cc(ccc1OC)C1N(C(=O)CCC1C(=O)NCCC[NH+]1CCCCCC1)c1ccc(OC)cc1	C125-0123	0.799	0.494	0.454	0.571	0.162	1
O(CC(O)c1cc2N(C)C(=O)N(c2cc1)C)c1ccc(cc1)C[NH2+]C1CCCCCCC1	D300-0324	0.791	0.514	0.254	0.822	0.333	1
O(CC(O)c1cc2N(C)C(=O)N(c2cc1)C)c1ccc(cc1)C[NH2+]C1CCCCCC1	D300-0319	0.791	0.514	0.254	0.822	0.326	1
O1c2c(CN(c3cccnc13)C(=O)CCC(=O)NCCC[NH+](Cc1ccccc1)CC)cccc2OC	C798-0987	0.777	0.288	0.05	0.813	0.037	1
O1c2cc(ccc2OC1)C([NH+]1CCN(CC1)c1ccc(OC)cc1)CNC(=O)C1CCCCC1	G856-4237	0.777	0.296	0.255	0.571	0.195	1
O(C)c1cc(OC)ccc1N1C(O)(c2c(NC1=O)cccc2)C(=O)NCCC[NH+]1CCC(CC1)Cc1ccccc1	C109-0503	0.776	0.058	-0.18	0.786	0.515	1
O(C)c1ccc(cc1)C1N(C(=O)CC1C(=O)NCC[NH+](CCC)CCC)c1ccc(OC)cc1	C141-0130	0.773	0.267	0.183	0.813	0.426	1
O(C)c1cc(ccc1OC)C1N(C(=O)CCC1C(=O)NCCC[NH+]1CC(CC(C1)C)C)c1ccc(OC)cc1	C125-0126	0.773	0.454	0.432	0.571	0.522	1
O(C)c1cc2c(cc1OC)C(=O)N(C=C2C(=O)NCC1[NH+](CCC1)CC)c1ccc(OCC)cc1	C080-0075	0.773	0.044	0.002	0.57	0.412	1
O(C)c1cc(ccc1OC)C1N(C(=O)CCC1C(=O)NCC[NH+](CC)CC)c1ccc(OC)cc1	C125-0076	0.773	0.042	0.046	0.556	0.337	1
o1nc(cc1-c1ccc(OC)cc1)C(=O)NCC([NH+]1CCCCC1)c1cc(OC)ccc1OC	D647-0080	0.765	0.529	0.51	0.571	0.095	1
o1nc(cc1-c1ccc(OC)cc1)C(=O)NCC([NH+]1CCCCC1)c1cc(OC)c(OC)cc1	D647-0102	0.765	0.431	0.697	0.571	0.046	1
O(C)c1ccc(cc1)CNC(=O)C[NH+]1CCC2(NC(=O)C(=N2)c2ccc(cc2)C(C)(C)C)CC1	G610-0026	0.75	0.214	0.264	0.846	0.041	1
o1c(nc(C[NH+]2CCC(CC2)C(=O)NCC[NH+](CC(C)C)CC(C)C)c1C)-c1cc(OC)c(OC)cc1	C522-0649	0.75	0.168	0.048	0.588	0.096	1
o1c(nc(C[NH+]2CCC(CC2)C(=O)NCCN(CC)c2ccccc2)c1C)-c1cc(OC)c(OC)cc1	C522-0653	0.75	0.363	0.373	0.571	0.014	1
O(C)c1cc(cc(OC)c1)C(=O)N1CC2(Nc3c([NH+]=C2NC2CCCC2)cccc3)CCC1	S019-0876	0.729	0.448	0.201	0.804	0.356	1
Fc1cc(ccc1OC)C(=O)N1CC2([NH2+]Cc3c([NH+]=C2NC2CCCC2)cccc3)CC1	S029-0830	0.729	0.084	0.168	0.565	0.463	1
o1nc(cc1-c1cc2OCCOc2cc1)C(=O)NCC([NH+]1CCCCC1)c1ccc(OC)cc1	D486-0117	0.726	0.215	0.453	0.813	0.043	1
O(CC)c1ccc(N2C(O)(c3c(NC2=O)cccc3)C(=O)NCCC[NH+]2CCC(CC2)C)cc1	C109-0306	0.674	-0.004	0.044	0.829	0.179	1
OC1(N(c2cc(C)c(cc2)C)C(=O)Nc2c1cccc2)C(=O)NCCC[NH+]1CCC(CC1)C	C109-0311	0.674	0.05	0.007	0.787	0.183	1
O(C)c1c(cccc1OC)C1NC(=O)NC(C[NH+]2CCC(CC2)Cc2ccccc2)=C1C(OCC)=O	C561-2749	0.674	-0.052	0.005	0.604	0.676	1
O1CCOc2c1cc(NC(=O)C(=O)NCC([NH+]1CCCCC1)c1cc3CCCN(c3cc1)C)cc2	F936-0677	0.639	0.655	0.58	0.845	0.296	1
S(=O)(=O)(N1CCC2([NH2+]CC[NH+]=C2NC2CCCCC2)CC1)c1ccc(cc1)CC(C)C	L676-1679	0.638	0.239	-0.016	0.6	0.047	1
S(=O)(=O)(N1CCC2([NH2+]CC[NH+]=C2NCc2ccc(cc2)C)CC1)c1ccc(cc1)CC(C)C	L676-1662	0.62	0.162	-0.07	0.804	0.08	1
S(=O)(=O)(N1CCC2([NH2+]CC[NH+]=C2NCc2cc(ccc2)C)CC1)c1ccc(cc1)CC(C)C	L676-1685	0.62	0.162	-0.07	0.804	0.08	1
O1c2cc(NC(=O)C(=O)NCC([NH+]3CCCCC3)c3cc4CCCN(c4cc3)C)ccc2OC1	F936-0672	0.617	0.631	0.445	0.789	0.296	1
O(C)c1c(OC)cc(cc1OC)C(=O)NCC([NH+]1CCc2c(C1)cccc2)c1cccnc1	E155-1019	0.614	0.043	-0.03	0.517	0.226	1
S(=O)(=O)(N1CCC2([NH2+]CC[NH+]=C2NCc2ccccc2)CC1)c1ccc(cc1)CC(C)C	L676-1675	0.563	0.074	-0.118	0.804	0.079	1
O1N=C(CC1Cc1cc(OC)c2OCOc2c1OC)C[NH2+]C(C)c1ccc(N2CCCCC2)cc1	8019-6194	0.546	0.218	0.086	0.557	0.171	1
S(=O)(=O)(N1CCC2([NH2+]CC[NH+]=C2NCc2ccc(OC)cc2)CC1)c1ccc(cc1)CC(C)C	L676-1663	0.545	0.162	-0.07	0.846	0.102	1
S(=O)(=O)(N1CCC2([NH2+]CC[NH+]=C2NCc2ccc(OC)cc2)CC1)c1ccc(cc1)C(C)(C)C	L676-0574	0.537	0.19	-0.075	0.773	0.089	1
S(=O)(=O)(N1CCC2([NH2+]CC[NH+]=C2NC2CCCC2)CC1)c1ccc(cc1)CC(C)C	L676-1678	0.537	0.19	-0.169	0.566	0.039	1
O(C)c1ccc(cc1)C1N(C2CCCCC2)C(=O)c2c(cccc2)C1C(=O)NCC(=O)NCC[NH+](CC)CC	C066-0667	0.525	0.394	0.317	0.846	0.594	1
O(CC)c1cc2C3N(CCc2cc1OCC)C(=O)c1c(cccc1)C3C(=O)NCCC[NH+]1CCCCC1CC	C289-0111	0.875	0.585	0.61	0.456	0.538	1
O(CC)c1cc(ccc1OCC)CCN1C(c2c(cccc2)C1=O)C(=O)NCCC[NH+]1C(CCCC1C)C	K786-5234	0.875	0.559	0.519	0.456	0.538	1
O=C(Nc1ccc(cc1)C(C)C)C(=O)NCC([NH+]1CCCCC1)c1cc2CCCN(c2cc1)C	F936-0729	0.875	0.667	0.634	0.206	0.556	1
O(C)c1ccc(cc1)C1N(C2CCCCC2)C(=O)c2c(cccc2)C1C(=O)NCCC[NH+]1CC[NH+](CC1)CC	C066-0510	0.875	0.309	0.627	0.206	0.545	1
O=C(NC(Cc1c2c([nH]c1)cccc2)C(=O)NCCC[NH+]1CC(CC(C1)C)C)C1CCC(CC1)C	C155-0155	0.875	0.52	0.678	0.182	0.628	1
S\1c2c(N(CC(=O)NCCC[NH+]3CCCCC3CC)C(=O)/C/1=C\c1ccc(cc1)CC)cccc2	C312-1745	0.875	0.79	0.721	0.181	0.601	1
S\1c2c(N(CC(=O)NCCC[NH+]3CC(CCC3)C)C(=O)/C/1=C\c1ccc(cc1)CC)cccc2	C312-1759	0.875	0.451	0.542	0.181	0.601	1
O=C1N(c2cc(ccc2N2C1CCCC2)C(=O)NCCC[NH+]1CCC(CC1)Cc1ccccc1)C	G587-0595	0.875	0.795	0.751	0.181	0.597	1
O(C)c1cc2n3c(cc2cc1)C(=O)N(CCCc1ccccc1)C(C3)(C(=O)NCCC[NH+]1CC(CC(C1)C)C)C	E522-0100	0.875	0.706	0.69	0.181	0.578	1
O=C1N(Cc2ccc(cc2)C)C(c2c1cccc2)C(=O)NCCC[NH+](C)C1CCCCC1	K786-1641	0.875	0.642	0.57	0.181	0.546	1
s1c(nc(C)c1C(=O)N1CCC(CC1)C(C(=O)NCC[NH+](C)C1CCCCC1)C)-c1ccccc1	L251-0541	0.875	0.782	0.742	0.181	0.52	1
Clc1cc2N(CC(Oc2cc1)C)C(=O)CCC(=O)NCCC[NH+]1CCC(CC1)Cc1ccccc1	E015-0543	0.875	0.79	0.751	0.179	0.575	1
Clc1ccc(cc1)C[NH+]1CCC(CC1)CNC(=O)c1cc2N(C)C(=O)C3N(CCCC3)c2cc1	G587-0601	0.875	0.795	0.751	0.179	0.557	1
Clc1ccc(cc1)CCN1C(c2c(cccc2)C1=O)C(=O)NCCC[NH+]1C(CCCC1C)C	K786-5033	0.875	0.549	0.517	0.179	0.546	1
Clc1cc(ccc1)C(=O)N1CC(CCC1)C(=O)NCCC[NH+]1CCC(CC1)Cc1ccccc1	G792-0346	0.875	0.345	0.581	0.179	0.52	1
S\1c2c(N(C)C(=O)/C/1=C\c1cc(ccc1)C)cc(cc2)C(=O)NCC[NH+](C(CC)C)C1CCCCC1	K788-9562	0.875	0.623	0.537	0.178	0.597	1
O(C)c1ccc(N2C=C(c3c(cccc3)C2=O)C(=O)NCCC[NH+]2C(CCCC2C)C)cc1	E456-1641	0.875	0.518	0.367	0.157	0.601	1
O(C)c1ccc(N2C=C(c3c(cccc3)C2=O)C(=O)NCCC[NH+]2CCCCC2CC)cc1	E456-1458	0.875	0.683	0.377	0.157	0.583	1
O=C1N(CCC[NH+](C)C2CCCCC2)C(Cn2c1cc1c2cccc1)(C(=O)NC1CCCCC1)C	E234-0132	0.875	0.503	0.387	0.157	0.509	1
s1c2CC(CCc2c2c1N=C(NC2=O)CCC(=O)NC1CC[NH+](CC1)Cc1ccccc1)C(C)(C)C	F145-0667	0.852	0.516	0.655	0.206	0.567	1
O=C1N(c2n(-c3c1cccc3)c(nn2)CCC(=O)NCCC[NH+]1CCCCC1C)Cc1ccccc1	C741-0081	0.852	0.545	0.572	0.181	0.596	1
o1c2c(n3c(c2)C(=O)N(CCC[NH+](Cc2ccccc2)C)C(C3)(C(=O)NC2CCCCC2)C)cc1C	E218-0261	0.852	0.525	0.393	0.181	0.569	1
o1c2c(n3c(c2)C(=O)N(CCC[NH+](Cc2ccccc2)C)C(C3)(C(=O)NC2CCC(CC2)C)C)cc1	E218-0402	0.852	0.525	0.534	0.042	0.569	1
S\1c2c(N(C)C(=O)/C/1=C\c1cc(ccc1)C)cc(cc2)C(=O)NCCC[NH+]1C(CCCC1C)C	K788-9560	0.848	0.515	0.548	0.178	0.601	1
O=C(NCC[NH+]1CCCCC1C)c1ccc(cc1)-c1cc2CCN(c2cc1)C(=O)C(C)C	L413-0353	0.848	0.742	0.654	0.157	0.54	1
O(CC)c1ccc(NC(=O)C(=O)NCC([NH+]2CCCCC2)c2cc3CCCN(c3cc2)C)cc1	F936-0673	0.799	0.664	0.726	0.206	0.624	1
O=C(NCC([NH+]1CCCCC1)c1cc2CCCN(c2cc1)C)C(=O)NCCC=1CCCCC=1	F936-0684	0.799	0.568	0.51	0.206	0.624	1
O=C(NCc1ccc(cc1)C)C(=O)NCC([NH+]1CCCCC1)c1cc2CCCN(c2cc1)C	F936-0656	0.799	0.646	0.687	0.206	0.556	1
O=C(Nc1ccc(cc1)CC)C(=O)NCC([NH+]1CCCCC1)c1cc2CCCN(c2cc1)C	F936-0698	0.799	0.437	0.563	0.206	0.556	1
O=C(N1c2c(CC1C(=O)NCCC[NH+]1CCC([NH+]3CCCCC3)CC1)cccc2)c1ccccc1	G366-1173	0.799	0.795	0.509	0.206	0.531	1
O=C(Nc1ccc(cc1)CC)C(=O)NCC([NH+]1CCCC1)c1cc2CCCN(c2cc1)C	F936-0396	0.799	0.443	0.591	0.206	0.513	1
Clc1ccccc1CNC(=O)C(=O)NCC([NH+]1CCCC1)c1cc2CCCN(c2cc1)C	F936-0412	0.799	0.317	0.545	0.204	0.819	1
Clc1ccc(cc1)CNC(=O)C(=O)NCC([NH+]1CCCCC1)c1cc2CCCN(c2cc1)C	F936-0657	0.799	0.633	0.687	0.204	0.556	1
O=C(N1CCC(CC1)C(C(=O)NCC[NH+](C)C1CCCCC1)C)c1[nH]c2c(c1)cccc2	L075-0413	0.799	0.619	0.717	0.182	0.511	1
O1c2c(N(CC(=O)NCC[NH+]3CCC(CC3)Cc3ccccc3)C(=O)C1CC)cc(cc2)C	K786-5653	0.799	0.676	0.51	0.181	0.6	1
O1c2c(N(CC1C)C(=O)CCC(=O)NCCC[NH+]1CCC(CC1)Cc1ccccc1)cc(cc2)C	E015-0847	0.799	0.795	0.751	0.181	0.557	1
O1c2c(N(CC1C)C(=O)CCC(=O)NCCC[NH+]1CCC(CC1)Cc1ccccc1)cccc2	E015-1455	0.799	0.795	0.729	0.181	0.557	1
O=C(N1CCCC1)C1[NH+](CCc2c1cccc2)CC(=O)N1CCC(CC1)Cc1ccccc1	P099-0286	0.799	0.504	0.461	0.181	0.538	1
O1c2c(N(CC(=O)NCCC[NH+]3CCC(CC3)Cc3ccccc3)C(=O)C1CC)cccc2	K786-5716	0.799	0.781	0.714	0.181	0.504	1
O1c2c(N(CC(=O)NCC[NH+]3CCC(CC3)Cc3ccccc3)C(=O)C1CC)cccc2	K786-5721	0.799	0.676	0.482	0.181	0.504	1
O=C1N(c2cc(ccc2N2C1CCCC2)C(=O)NC1CC[NH+](CC1)Cc1ccccc1)C	G587-0495	0.799	0.51	0.744	0.139	0.529	1
o1c(nc(C[NH+]2CCC(CC2)C(=O)NC(CCc2ccccc2)C)c1C)-c1cc(OC)c(OC)cc1	C522-0614	0.777	0.721	0.719	0.456	0.561	1
O=C1N(c2c(N=C1N1CCC(CC1)C(=O)NC(CC)C[NH+](Cc1ccccc1)C)cccc2)CC	F448-0541	0.777	0.629	0.619	0.181	0.641	1
O=C1N(c2c(N=C1N1CCC(CC1)C(=O)NC(CC)C[NH+](Cc1ccccc1)C)cccc2)C	F448-0751	0.777	0.629	0.605	0.181	0.641	1
O=C1N(c2c(N=C1N1CC(CCC1)C(=O)NCC1[NH+](CCC1)CC)cccc2)Cc1ccc(cc1)C	C700-2641	0.777	0.557	0.592	0.181	0.601	1
O=C1N(c2c(N=C1C)cc(cc2)C(=O)NCCC[NH+]1CCCCC1C)Cc1ccccc1	F353-0817	0.777	0.659	0.272	0.181	0.601	1
O=C1N(c2c(N=C1N1CC(CCC1)C(=O)NCC1CC[NH+](CC1)Cc1ccc(cc1)C)cccc2)C	F681-0474	0.777	0.629	0.649	0.181	0.597	1
O=C1N(c2c(N=C1N1CCC(CC1)C(=O)NCC[NH+]1CCCCC1C)cccc2)Cc1ccc(cc1)C	C700-2595	0.777	0.621	0.626	0.181	0.575	1
O=C1N(c2c(N=C1N1CCC(CC1)C(=O)NCC1[NH+](CCC1)CC)cccc2)Cc1ccc(cc1)C	F448-1015	0.777	0.621	0.619	0.181	0.575	1
O=C1N(c2c(N=C1N1CC(CCC1)C(=O)NCCC[NH+]1CCCCC1)cccc2)Cc1ccccc1	F681-0104	0.777	0.337	0.597	0.181	0.575	1
O=C1N(c2c(N=C1N1CCC(CC1)C(=O)NCCC([NH+]1CCCC1)C)cccc2)Cc1ccccc1	F448-0124	0.777	0.621	0.597	0.181	0.559	1
O=C1N(c2c(N=C1N1CC(CCC1)C(=O)NCCC[NH+]1CCCC1)cccc2)Cc1ccc(cc1)C	F681-0592	0.777	0.337	0.619	0.181	0.557	1
O=C1N(c2c(N=C1N1CC(CCC1)C(=O)NC1CC[NH+](CC1)Cc1ccccc1)cccc2)CC	F681-0222	0.777	0.621	0.604	0.181	0.557	1
O=C1N(c2c(N=C1N1CC(CCC1)C(=O)NC1CC[NH+](CC1)Cc1ccccc1)cccc2)C	F681-0412	0.777	0.629	0.612	0.181	0.544	1
O=C1N(c2c(N=C1N1CC(CCC1)C(=O)NCCC[NH+]1CCCC1)cccc2)Cc1ccccc1	F681-0105	0.777	0.337	0.582	0.181	0.504	1
Clc1cc(ccc1)-c1oc(C)c(n1)C[NH+]1CC(CCC1)C(=O)NCCCN(C)c1ccccc1	C522-5011	0.777	0.472	0.545	0.179	0.545	1
O=C1N2C(N(c3c1ccc(c3)C(=O)NC1CC[NH+](CC1)Cc1ccccc1)C)CCCC2	S420-0307	0.777	0.431	0.597	0.138	0.557	1
s1c2CC(CCc2c2c1N=C(NC2=O)CCC(=O)NC1CC[NH+](CC1)Cc1ccccc1)C	F145-0322	0.777	0.529	0.664	0.119	0.551	1
O=C(NCCC[NH+]1CCCCC1C)Cc1ccc(NC(=O)N2CCCCc3c2cccc3)cc1	G217-1146	0.776	0.532	0.548	0.206	0.805	1
O=C(NCCC[NH+]1CCCCC1CC)c1ccc(NC(=O)N2CCCCc3c2cccc3)cc1	G217-0154	0.776	0.516	0.593	0.206	0.774	1
O=C(NCCC[NH+]1CCCCC1C)c1ccc(NC(=O)N2CCCCc3c2cccc3)cc1	G217-0156	0.776	0.38	0.548	0.206	0.766	1
O(CC)c1ccc(NC(=O)C(=O)NCC([NH+]2CCCC2)c2cc3CCCN(c3cc2)C)cc1	F936-0374	0.773	0.581	0.718	0.206	0.578	1
O=C(Nc1ccc(cc1)C(C)C)C(=O)NCC([NH+]1CCCC1)c1cc2CCCN(c2cc1)C	F936-0427	0.773	0.56	0.64	0.206	0.556	1
O(C)c1cc2[nH]c(cc2cc1)C(=O)N1CCC(CC1)C(C(=O)NCC[NH+](C)C1CCCCC1)C	L075-0815	0.773	0.577	0.693	0.043	0.641	1
O(C)c1cc2[nH]c(cc2cc1)C(=O)N1CCC(CC1)C(C(=O)NCCC[NH+]1CC(CCC1)C)C	L075-0812	0.773	0.5	0.663	0.042	0.563	1
O(C)c1cc2[nH]c(cc2cc1)C(=O)N1CCC(CC1)C(C(=O)N1CC[NH+](CC1)C1CCCCC1)C	L075-0705	0.773	0.739	0.718	0.011	0.502	1
O=C1N(c2c(N=C1N1CCC(CC1)C(=O)NCC1CC[NH+](C1)Cc1ccc(cc1)C)cccc2)CC	F448-0536	0.758	0.621	0.626	0.181	0.575	1
o1c(nc(C[NH+]2CCC(CC2)C(=O)NC2CCCC(C)C2C)c1C)-c1cc(OC)c(OC)cc1	C522-0609	0.75	0.588	0.479	0.227	0.531	1
O1c2c(N(CC1CC)C(=O)N1CCC(CC1)C(=O)NCCC[NH+](Cc1ccccc1)C)cc(cc2)C	E216-5769	0.701	0.532	0.586	0.181	0.722	1
O1c2c(N(CC1CC)C(=O)N1CCC(CC1)C(=O)NCCC[NH+](Cc1ccccc1)C)cccc2	E216-5553	0.701	0.532	0.549	0.181	0.677	1
O1c2c(N(CC1CC)C(=O)N1CCC(CC1)C(=O)NCCC[NH+]1CCc3c(C1)cccc3)cccc2	E216-5571	0.701	0.532	0.571	0.181	0.675	1
O=C1N(c2ncccc2N=C1N1CC(CCC1)C(=O)NCC[NH+]1CCC(CC1)Cc1ccccc1)C	F677-0484	0.701	0.382	0.504	0.042	0.566	1
Fc1ccc(cc1)CNC(=O)C(=O)NCC([NH+]1CCCCC1)c1cc2CCCN(c2cc1)C	F936-0671	0.654	0.181	0.55	0.206	0.556	1
Fc1ccccc1C[NH+]1CCC(CC1)CNC(=O)C1N(c2c(C1)cccc2)C(=O)CC	G366-0623	0.654	0.178	0.506	0.181	0.53	1
Fc1ccccc1C[NH+]1CCC(CC1)CNC(=O)c1cc2N(C)C(=O)C3N(CCCC3)c2cc1	G587-0668	0.654	0.228	0.561	0.144	0.529	1
O=C1N(c2c(N=C1N1CC(CCC1)C(=O)NCCC[NH+]1CCc3c(C1)cccc3)cccc2)CC	F681-0286	0.643	0.629	0.649	0.181	0.557	1
Clc1cc(N2CC[NH+](CC2)CCCNC(=O)c2cc3N(C)C(=O)C4N(CCCC4)c3cc2)ccc1	G587-0576	0.639	0.592	0.649	0.179	0.557	1
O=C1N(c2c(N=C1N1CCC(CC1)C(=O)NCCC[NH+]1CC(CCC1)C)cccc2)CC	F448-0512	0.622	0.562	0.484	0.173	0.583	1
O=C(NC1CCCC(C)C1C)CCC(=O)Nc1cc2c(nc(N3CC[NH+](CC3)C)cc2C)cc1	C204-0225	0.617	0.52	0.502	0.198	0.627	1
O=C1N(c2ncccc2N=C1N1CC(CCC1)C(=O)NCCC[NH+]1CCc2c(C1)cccc2)CC	F677-0286	0.568	0.382	0.518	0.042	0.529	1
O=C(Nc1cc([nH+]c2c1cccc2)C)C(=O)NCC([NH+]1CCCC1)c1cc2CCCN(c2cc1)C	F936-0399	0.54	0.558	0.509	0.067	0.739	1
O1[C@]23[C@H](C([C@@H]1C=C2)C(=O)Nc1ccc(OC)cc1)C(=O)N(CCC[NH+]1CCCCC1)C3C(=O)NC1CCCC(C)C1C	C073-2857	0.525	0.582	0.537	0.206	0.643	1
O1[C@@]23[C@@H](C([C@H]1C=C2)C(=O)Nc1ccc(OC)cc1)C(=O)N(CC[NH+]1CCCCC1)C3C(=O)NC1CCCC(C)C1C	C073-2875	0.525	0.582	0.423	0.206	0.643	1
O1[C@]23[C@H](C([C@@H]1C=C2)C(=O)Nc1ccc(OC)cc1)C(=O)N(CCC[NH+]1CC(CCC1)C)C3C(=O)NC1CCCCC1	C073-4174	0.525	0.582	0.537	0.206	0.636	1
O1[C@@]23[C@@H](C([C@H]1C=C2)C(=O)Nc1ccc(OC)cc1)C(=O)N(CC[NH+]1CCCCC1CC)C3C(=O)NC1CCCCC1	C073-4168	0.525	0.582	0.423	0.206	0.634	1
Clc1cc(NC(=O)C2[C@H]3[C@]4(O[C@H]2C=C4)C(N(CCC[NH+](CCCC)C)C3=O)C(=O)NC2CCCCC2)ccc1C	C073-4677	0.525	0.539	0.371	0.204	0.612	1
O=C1N(c2c(cccc2)C(=O)N2C1CCC2)Cc1ccccc1C(=O)NCC[NH+](C)C1CCCCC1	L610-1004	0.525	0.593	0.26	0.181	0.623	1
O=C1N(c2c(cccc2)C(=O)N2C1CCC2)Cc1ccc(cc1)C(=O)NCC[NH+](C)C1CCCCC1	L610-0621	0.525	0.593	0.326	0.181	0.596	1
O=C1N(CCCCCC(=O)N2C3C(c4cc(ccc24)C)C[NH+](CC3)C)C(=O)c2c1cccc2	8012-0449	0.525	0.532	0.36	0.139	0.508	1
O(C)c1ccc(N2N=C(c3c(n(c4c3cccc4)C)C2=O)C(=O)NCCC[NH+]2CCCCC2CC)cc1	C448-1051	0.492	0.576	0.436	0.181	0.625	1
O(CC)c1ccc(N2N=C(c3c(cccc3)C2=O)C(=O)NCCC[NH+]2CCCCC2CC)cc1	K999-0251	0.492	0.678	0.537	0.181	0.601	1
O=C1N(N=Cc2c1c(n(CCCC(=O)NCCC[NH+]1CCCCC1C)c2C)C)c1ccccc1	C890-0970	0.492	0.621	0.626	0.181	0.6	1
O=C1N(N=Cc2c1c(n(CCCC(=O)NCCC[NH+]1C(CCCC1C)C)c2C)C)c1ccccc1	C890-0987	0.492	0.469	0.592	0.181	0.6	1
O=C1N(N=C(c2nn(c(c12)C)-c1ccccc1)C)C(CC)C(=O)NCCC[NH+](C)C1CCCCC1	G740-1304	0.492	0.605	0.63	0.181	0.587	1
o1cccc1C[NH+](C(CC)C)CCCNC(=O)CN1N=Cc2c(n(c3c2cccc3)CCC)C1=O	E717-0304	0.492	0.558	0.594	0.181	0.53	1
O=C1N(N=Cc2c1n(c1c2cccc1)Cc1ccccc1)CC(=O)NCCC[NH+]1C(CCCC1C)C	C880-0774	0.492	0.472	0.57	0.181	0.52	1
O=C1N(N=Cc2c1n(c1c2cccc1)Cc1ccccc1)CC(=O)NCCC[NH+]1CCCCC1C	C880-0759	0.492	0.526	0.48	0.181	0.52	1
O=C1N(N=Cc2c1n(c1c2cccc1)CCCC(=O)NC(CC)C[NH+](Cc1ccccc1)C)C	F249-0204	0.492	0.386	0.579	0.181	0.517	1
o1c(ccc1C[NH+]1CCCCC1CC)CNC(=O)CN1N=Cc2c(n(c3c2cccc3)CCC)C1=O	E717-0357	0.492	0.615	0.649	0.181	0.504	1
O(C)c1ccccc1-c1nn2c(N(CC)C(C)=C(CCC(=O)NCC3CC[NH+](C3)C3CCCC3)C2=O)c1	C561-2223	0.492	0.617	0.64	0.175	0.597	1
O(C)c1cc(OC)ccc1NC(=O)C(=O)NCC([NH+]1CCCC1)c1cc2CCCN(c2cc1)C	F936-0382	0.488	0.591	0.622	0.211	0.501	1
O=C1N(N=Cc2c1c(n(CCCC(=O)NCC[NH+]1CCCCC1C)c2C)C)c1ccccc1	C890-0980	0.465	0.586	0.613	0.181	0.601	1
O=C1N(N=Cc2c1c(n(CCCC(=O)NCCC[NH+]1CC(CC(C1)C)C)c2C)C)c1ccccc1	C890-0978	0.465	0.522	0.579	0.181	0.575	1
O=C1N(N=Cc2c1c(n(Cc1ccccc1)c2C)C)CC(=O)NCCC[NH+]1C(CCCC1C)C	C891-0228	0.465	0.522	0.579	0.181	0.546	1
O=C1N(N=Cc2c1c(n(Cc1ccccc1)c2C)C)CC(=O)NCCC[NH+]1CCCCC1CC	C891-0208	0.465	0.586	0.613	0.181	0.53	1
O=C1N(N=Cc2c1c(n(C(CC)C(=O)NCCC[NH+]1CC(CC(C1)C)C)c2C)C)c1ccccc1	C890-0738	0.465	0.498	0.561	0.18	0.601	1
Clc1ccccc1Cn1c(c2c(C=NN(CC(=O)NCCC[NH+]3CCCCC3CC)C2=O)c1C)C	C891-2175	0.465	0.586	0.613	0.179	0.546	1
Clc1ccccc1Cn1c(c2c(C=NN(CC(=O)NCCC[NH+]3C(CCCC3C)C)C2=O)c1C)C	C891-2192	0.465	0.522	0.579	0.178	0.546	1
Clc1ccccc1Cn1c(c2c(C=NN(CC(=O)NCCC[NH+]3CCCCC3C)C2=O)c1C)C	C891-2177	0.465	0.543	0.47	0.178	0.546	1
O=C1N(N=Cc2c1c(n(Cc1ccc(cc1)C)c2C)C)CC(=O)NCCC[NH+]1CCCCC1CC	C891-1301	0.465	0.586	0.605	0.174	0.546	1
O=C1N(N=Cc2c1n(c1c2cccc1)CCC)CC(=O)NCCC[NH+]1C(CCCC1C)C	E717-0263	0.465	0.522	0.579	0.157	0.528	1
s1c2c(c3c1cccc3)C(=O)N(N=C2C)C(C(=O)NCCC[NH+]1CCC([NH+]2CCCCC2)CC1)C	E019-0528	0.465	0.586	0.406	0.067	0.682	1
o1nc(nc1N1CC(CCC1)C(=O)NCC1CC[NH+](CC1)Cc1cc(ccc1)C)-c1ccc(OC)cc1	E598-0182	0.417	0.626	0.591	0.181	0.713	1
O=C1N(N=CC(N2CC(CCC2)C(=O)NCC[NH+](C)C2CCCCC2)=C1)Cc1ccccc1	T424-0823	0.417	0.617	0.64	0.181	0.568	1
o1nc(nc1N1CC(CCC1)C(=O)NC1CC[NH+](CC1)Cc1ccccc1)-c1ccc(OC)cc1	E598-0177	0.417	0.626	0.503	0.181	0.527	1
O=C1N(N=CC(N2CC(CCC2)C(=O)NCC[NH+]2CCCCCC2)=C1)Cc1ccccc1	T424-0794	0.417	0.345	0.641	0.124	0.501	1
o1nc(nc1C[NH+]1CCC(CC1)C(=O)NC(CCc1ccccc1)C)-c1cc(OC)c(OC)cc1	E903-0700	0.408	0.674	0.607	0.456	0.575	1
o1nc(nc1N1CCC(CC1)C(=O)NCC1CC[NH+](C1)Cc1ccc(cc1)C)-c1ccc(OC)cc1	G781-0327	0.398	0.626	0.591	0.181	0.529	1
O1[C@@]23[C@@H](C([C@H]1C=C2)C(=O)Nc1cc(OC)ccc1)C(=O)N(CCC[NH+]1CCC(CC1)C)C3C(=O)NC1CCCCC1	C073-4080	0.396	0.582	0.537	0.206	0.643	1
O1[C@@]23[C@@H](C([C@H]1C=C2)C(=O)Nc1cc(OC)ccc1)C(=O)N(CCC[NH+]1CC(CCC1)C)C3C(=O)NC1CCCCC1C	C073-5398	0.396	0.582	0.537	0.206	0.643	1
O=C1N(N=C(c2c1nn(c2C)-c1ccccc1)C)C(C(=O)NCCC[NH+](C)C1CCCCC1)C	E854-1324	0.39	0.581	0.616	0.181	0.587	1
O=C1N(N=C(c2nn(c(c12)C)-c1ccccc1)C)C(C(=O)NCCC[NH+](C)C1CCCCC1)C	G740-1521	0.39	0.581	0.616	0.181	0.587	1
O=C1N(N=Cc2c1c(n(CCCC(=O)NCC1[NH+](CCC1)CC)c2C)C)c1ccccc1	C890-0917	0.39	0.515	0.558	0.181	0.583	1
O=C1N(N=C(c2nn(c(c12)C)-c1ccccc1)C)C(CC)C(=O)NCCC[NH+]1CCCCCC1	G740-1292	0.39	0.554	0.602	0.181	0.546	1
O=C1N(N=C(c2nn(c(c12)C)-c1ccccc1)C)CC(=O)NCCC([NH+]1CCCCCC1)C	G740-1108	0.39	0.583	0.558	0.181	0.546	1
O=C1N(N=C(c2c1nn(c2C)-c1ccccc1)C)C(C(=O)N1CCC([NH+]2CCCCC2)CC1)C	E854-1399	0.39	0.434	0.578	0.139	0.541	1
O(C)c1cc(N2N=C(c3c(cccc3)C2=O)C(=O)NCCC[NH+]2CCCCC2CC)cc(OC)c1	K999-0314	0.371	0.516	0.317	0.813	0.624	1
S1C=2N(N=C1N1CC(CCC1)C(=O)NCCC[NH+](Cc1ccccc1)CCCC)C(=O)C=C(N=2)C	C885-0522	0.281	0.626	0.595	0.181	0.566	1
Clc1cc(NC(=O)C(=O)NCC([NH+]2CCCCC2)c2cc3CCCN(c3cc2)C)ccc1OC	F936-0694	0.22	0.631	0.718	0.204	0.819	1
S(=O)(=O)(CCC(N1Cc2c(cccc2)C1=O)C(=O)NCC1CC[NH+](CC1)Cc1cc(ccc1C)C)C	E612-1237	0.196	0.505	0.124	0.181	0.546	1
Clc1ccccc1CNC(=O)CSC1=Nc2c(cccc2)C(=O)N1CCC[NH+]1CCCCC1CC	K284-4290	0.137	0.583	0.502	0.179	0.546	1
O=C1N(CC)C(Cn2nc(cc12)C(=O)NCCC[NH+]1CCc2c(C1)cccc2)(C(=O)NC1CCCC1)C	E852-3536	0.114	0.564	0.479	0.206	0.613	1
o1nc(nc1C[NH+]1CC(CCC1)C(=O)NC1CCCCCC1)-c1cc(OC)c(OC)cc1	E903-0046	0.112	0.753	0.425	0.241	0.549	1
Clc1cc(N2CC[NH+](CC2)CCNC(=O)c2cc3N(C)C(=O)C4N(CCCC4)c3cc2)ccc1	G587-0607	0.02	0.572	0.554	0.132	0.557	1
O(C)c1cc(OC)ccc1Nc1nc2c(cccc2)c(c1)C(=O)NCCC[NH+]1CCCCC1CC	C387-0290	0.875	0.779	0.749	0.488	0.301	1
O(C)c1cc(OC)ccc1CN1C(c2c(cccc2)C1=O)C(=O)NCCC[NH+]1C(CCCC1C)C	K786-5035	0.875	0.496	0.385	0.456	0.625	1
O(C)c1cc2c(cc1OC)C(=O)N1C(c3c(CC1)cccc3)C2C(=O)NCC1CC[NH+](CC1)Cc1cc(ccc1)C	C066-2351	0.875	0.25	0.271	0.456	0.541	1
O(C)c1cc2C3N(CCc2cc1OC)C(=O)c1c(cccc1)C3C(=O)NCCC[NH+]1CCC(CC1)Cc1ccccc1	C265-0451	0.875	0.169	-0.021	0.456	0.503	1
O(CC)c1cc2C3N(CCc2cc1OCC)C(=O)c1c(cccc1)C3C(=O)NCC1CC[NH+](CC1)Cc1cc(ccc1)C	C289-0203	0.875	0.25	0.271	0.456	0.501	1
O(C)c1cc(ccc1OC)C(N1Cc2c(cccc2)C1=O)CC(=O)NC1CC[NH+](CC1)Cc1ccccc1	E787-0643	0.875	0.243	-0.106	0.456	0.425	1
o1nc(cc1-c1cc2OCCOc2cc1)C(=O)NCC([NH+]1CCCCC1)c1ccc(cc1)CC	D647-0241	0.875	0.172	0.466	0.456	0.235	1
O(C)c1cc2c(cc1OC)C(=O)N1C(c3c(CC1)cccc3)C2C(=O)NCCC[NH+]1CCCCC1CC	C358-0111	0.875	0.358	0.345	0.261	0.624	1
O(C)c1c2c(n3c(c2)C(=O)N(CCC[NH+]2CC(CC(C2)C)C)C(C3)(C(=O)NC2CCCCCC2)C)c(OC)cc1	C795-0861	0.875	0.297	0.104	0.261	0.54	1
O=C1Nc2cc(ccc2NC1C(CC)C)C(=O)NCCC[NH+]1CCC(CC1)Cc1ccccc1	K786-0966	0.875	0.706	0.692	0.206	0.472	1
O(CCC)c1ccc(N2C(=O)C([NH2+]CCC[NH+]3CCC(CC3)Cc3ccccc3)CC2=O)cc1	5593-2352	0.875	0.78	0.568	0.206	0.406	1
O=C(NCCC[NH+]1CCC(CC1)Cc1ccccc1)C1CCCN(C1)c1[nH]c2cc(ccc2n1)C	G796-2476	0.875	0.481	0.623	0.206	0.35	1
O=C(NCCC[NH+]1CCC(CC1)Cc1ccccc1)C1CCCN(C1)c1[nH]c2c(n1)cccc2	G796-2139	0.875	0.481	0.587	0.206	0.35	1
s1c2CC(CCc2nc1NC(=O)C[NH+]1CC[NH+](CC1)C(c1ccccc1)c1ccccc1)C	Y020-0564	0.875	0.153	-0.029	0.206	0.318	1
O1CC[NH+](CC1)CCN(C(C(=O)NC1CCCCC1)c1ccccc1)C(=O)Cc1c2c([nH]c1)cccc2	D092-0205	0.875	0.004	-0.237	0.206	0.314	1
O(C)c1ccc(Nc2nc3c(cccc3)c(c2)C(=O)NCCC[NH+]2CCCCC2CC)cc1	C387-0171	0.875	0.701	0.551	0.206	0.301	1
O=C(NCCC[NH+]1CC[NH+](CC1)Cc1ccccc1)c1ccc(-n2c3CCC(Cc3cc2C)C)cc1	E644-0503	0.875	-0.09	0.075	0.206	0.287	1
O(C)c1ccccc1Nc1nc2c(cccc2)c(c1)C(=O)NCCC[NH+]1CCCCC1CC	C387-2075	0.875	0.677	0.696	0.206	0.235	1
O(C)c1ccc(cc1)C(=O)Nc1cc2c([nH]c(C)c2C([NH+]2CCCCC2)c2ncccc2)cc1	D488-0331	0.875	0.073	-0.254	0.206	0.21	1
O=C(N1c2cc(NC(=O)C(CCC)CCC)ccc2CCc2c1cccc2)CC[NH+]1CC[NH+](CC1)C	3966-0057	0.875	0.342	0.261	0.206	0.19	1
O=C(N1c2cc(NC(=O)C(CCC)CCC)ccc2CCc2c1cccc2)C[NH+]1CC[NH+](CC1)C	3966-0064	0.875	0.245	0.101	0.206	0.19	1
O(C)c1ccccc1C(=O)Nc1cc2c([nH]c(C)c2C([NH+]2CCCCC2)c2ncccc2)cc1	D488-0298	0.875	0.035	-0.164	0.206	0.186	1
S\1c2c(NC(=O)/C/1=C\c1cc(ccc1)C)cc(cc2)C(=O)NCC[NH+](C)C1CCCCC1	C700-0665	0.875	0.186	0.238	0.206	0.023	1
Clc1cc2[nH]c(nc2cc1)N1CC(CCC1)C(=O)NCCC[NH+]1CCC(CC1)Cc1ccccc1	G796-1812	0.875	0.426	0.623	0.204	0.35	1
S(c1c2c([nH]c1C(=O)NCCC[NH+]1C(CCCC1C)C)cc(OC)cc2)c1ccccc1	E018-1948	0.875	0.268	0.25	0.182	0.314	1
O=C(NCCC[NH+]1CCC(CC1)Cc1ccccc1)C1CCCc2c1[nH]c1c2cccc1	L345-0196	0.875	0.557	0.463	0.182	0.246	1
O(C)c1ccc(cc1)CN1C(c2c(cccc2)C1=O)C(=O)NCCC[NH+]1C(CCCC1C)C	K786-5233	0.875	0.471	0.433	0.181	0.601	1
O(C)c1ccc(cc1)C1N(C2CCCCC2)C(=O)c2c(cccc2)C1C(=O)NCCC[NH+]1CCC(CC1)C	C066-0294	0.875	0.353	0.215	0.181	0.601	1
O(C)c1ccccc1CN1C(c2c(cccc2)C1=O)C(=O)NCCC[NH+]1C(CCCC1C)C	K786-5034	0.875	0.309	0.204	0.181	0.601	1
O=C(N1CCCCC1)C1[NH+](CCc2c1cccc2)CC(=O)NC(C)c1ccc(cc1)CC	P099-0596	0.875	0.28	0.137	0.181	0.587	1
O=C(N1CCC(CC1)C)C1[NH+](CCc2c1cccc2)CC(=O)NC(C)c1ccc(cc1)CC	P099-0760	0.875	0.112	-0.025	0.181	0.587	1
s1c2CC(CCc2c(C(=O)N2CC[NH+](CC2)Cc2ccccc2)c1NC(=O)c1cc(ccc1)C)C	3261-0834	0.875	0.205	-0.1	0.181	0.587	1
s1c2CC(CCc2c(C(=O)N2CC[NH+](CC2)Cc2ccccc2)c1NC(=O)c1ccccc1)C(C)(C)C	4473-0225	0.875	0.202	-0.111	0.181	0.587	1
O=C1N(CCC[NH+](Cc2ccccc2)C)C(Cn2c1cc1c2cccc1)(C(=O)NC1CCCCC1)C	E234-0113	0.875	0.177	0.173	0.181	0.546	1
O(C)c1ccc(cc1)CN1C(Cn2c(cc3c2cccc3)C1=O)(C(=O)NCCC[NH+]1CC(CC(C1)C)C)C	E522-0128	0.875	0.42	0.33	0.181	0.538	1
O(C)c1cc2n3c(cc2cc1)C(=O)N(Cc1ccccc1)C(C3)(C(=O)NCCC[NH+]1CC(CC(C1)C)C)C	E522-0093	0.875	0.42	0.29	0.181	0.538	1
O(C)c1ccc(cc1)C1N(C2CCCCC2)C(=O)c2c(cccc2)C1C(=O)NCCC[NH+]1CC(CC(C1)C)C	C066-0500	0.875	0.353	0.215	0.181	0.538	1
O=C(N1CCC(CC1)C)C1[NH+](CCc2c1cccc2)CC(=O)NCc1ccc(cc1)CC	P099-0773	0.875	0.044	0.046	0.181	0.533	1
O=C1N(Cc2c1cccc2)C(Cc1ccccc1)C(=O)NCC1CC[NH+](CC1)Cc1cc(ccc1C)C	E612-0616	0.875	0.008	-0.419	0.181	0.52	1
O=C1N(CCC[NH+]2CCc3c(C2)cccc3)C(Cn2c1cc1c2cccc1)(C(=O)NC1CCCCC1)C	E234-0134	0.875	0.525	0.394	0.181	0.496	1
O=C1N(Cc2c1cccc2)C(CC(C)C)C(=O)NCC[NH+]1CCC(CC1)Cc1ccccc1	E612-1016	0.875	0.672	0.69	0.181	0.493	1
O=C1N(c2cc(ccc2)CC)C(=NC1Cc1ccccc1)N1CCC([NH+]2CCCCC2)CC1	G218-4246	0.875	0.538	0.379	0.181	0.492	1
O=C1N(Cc2c1cccc2)C(CC(C)C)C(=O)NCCC[NH+]1CCC(CC1)Cc1ccccc1	E612-1014	0.875	0.687	0.69	0.181	0.466	1
s1cccc1C1N(C2CCCC2)C(=O)c2c(cccc2)C1C(=O)NCCC[NH+]1CCN(CC1)c1ccccc1OC	E456-1356	0.875	0.141	-0.055	0.181	0.428	1
O=C1N(Cc2c1cccc2)C(Cc1ccccc1)C(=O)NCCC[NH+]1CCC(CC1)Cc1ccccc1	E612-0600	0.875	0.28	-0.101	0.181	0.402	1
O=C1N(Cc2c1cccc2)C(C(=O)NCCC[NH+]1CCC(CC1)Cc1ccccc1)c1ccccc1	E612-0186	0.875	0.266	-0.136	0.181	0.362	1
O=C(NCCC[NH+]1CCCCC1CC)C1CCN(CC1)C1=Nc2c(-n3c1ccc3)cccc2	E229-0215	0.875	0.621	0.649	0.181	0.357	1
O=C(NCCC[NH+]1CCN(CC1)c1cc(ccc1C)C)c1ccc(-n2c3CCC(Cc3cc2C)C)cc1	E644-0538	0.875	0.353	0.361	0.181	0.35	1
O(C)c1ccc(cc1)C(N1Cc2c(cccc2)C1=O)CC(=O)NC1CC[NH+](CC1)Cc1ccccc1	E787-0091	0.875	0.203	-0.292	0.181	0.348	1
s1c2c(nc1N1CC(CCC1)C(=O)NCCC[NH+]1CCC(CC1)Cc1ccccc1)c(cc(c2)C)C	C797-0396	0.875	0.797	0.728	0.181	0.347	1
O=C(N1c2c(CC1C(=O)NCCC[NH+]1CCC(CC1)Cc1ccccc1)cccc2)c1ccccc1	G366-1171	0.875	0.316	-0.105	0.181	0.327	1
O(C)c1ccc(cc1)C1N(C2CCCCC2)C(=O)c2c(cccc2)C1C(=O)N1CC[NH+](CC1)CCC	C066-0518	0.875	0.063	0.124	0.181	0.302	1
O(C)c1ccc(cc1)C1N(C2CCCCC2)C(=O)c2c(cccc2)C1C(=O)N1CC[NH+](CC1)CC	C066-0498	0.875	0.063	0.061	0.181	0.302	1
o1nc(cc1-c1cc2CCCCc2cc1)C(=O)NCC([NH+]1CCOCC1)c1ccc(cc1)C(C)C	D647-0262	0.875	0.023	0.072	0.181	0.251	1
O(C)c1ccc(cc1)CCC(=O)NCC([NH+]1CCCCC1)c1cc2CCCN(c2cc1)C	F936-0609	0.875	0.693	0.554	0.181	0.249	1
s1c2c(CCCCC2)c(C(=O)N2CC[NH+](CC2)Cc2ccccc2)c1NC(=O)c1cc(ccc1)C	3261-0814	0.875	0.32	0.184	0.181	0.038	1
s1c2c(CCCCC2)c(C(=O)N2CC[NH+](CC2)Cc2ccccc2)c1NC(=O)c1ccccc1C	3261-0864	0.875	0.32	0.131	0.181	0.038	1
s1c2c(CCCC2)c(C(=O)N2CC[NH+](CC2)Cc2ccccc2)c1NC(=O)c1cc(ccc1)C	3261-0860	0.875	0.053	-0.094	0.181	0.038	1
s1c2c(CCCC2)c(C(=O)N2CC[NH+](CC2)Cc2ccccc2)c1NC(=O)c1ccccc1C	3261-1022	0.875	0.053	-0.113	0.181	0.038	1
S1c2c(cccc2)C(=O)Nc2cc(ccc12)C(=O)NCC[NH+](C(CC)C)C1CCCCC1	C791-0100	0.875	0.463	0.218	0.181	0.03	1
S\1c2c(N(C)C(=O)/C/1=C\c1ccccc1OC)cc(cc2)C(=O)NCCC[NH+]1CCC(CC1)Cc1ccccc1	C310-1264	0.875	0.277	-0.154	0.181	0.03	1
S1c2c(cccc2)C(=O)N(c2cc(ccc12)C(=O)NCCC[NH+]1CCC(CC1)C)Cc1cc(OC)ccc1	C380-0493	0.875	0.266	-0.154	0.181	0.018	1
O(C)c1ccccc1\N=C(\NC(=O)c1cc(ccc1)C)/N1CC[NH+](CC1)C1CCCCC1	F077-0882	0.875	0.23	0.084	0.181	0.013	1
O=C(N1CCC(CC1)C(C(=O)NCCC[NH+]1CCCCC1CC)C)c1[nH]c2c(c1)cccc2	L075-0394	0.875	0.507	0.663	0.181	0.009	1
O=C1N(c2c(-c3n(C)c(cc13)C(=O)NCCC[NH+]1CCC(CC1)Cc1ccccc1)cccc2)C	C660-0196	0.875	0.265	0.328	0.181	0.009	1
S\1c2c(N(CC(=O)NCCC[NH+]3CCCCC3CC)C(=O)/C/1=C\c1ccc(cc1)C)cccc2	C312-0584	0.875	0.752	0.697	0.18	0.052	1
S\1c2c(N(CC(=O)NCCC[NH+]3CCCCC3C)C(=O)/C/1=C\c1ccc(cc1)C)cccc2	C312-0585	0.875	0.413	0.419	0.18	0.052	1
O1c2c(N(CC(=O)NCCC[NH+](Cc3ccccc3)CCCC)C(=O)C1CC)cc(cc2)C	K786-5728	0.875	0.485	0.414	0.18	0.052	1
S1c2c(cccc2)C(=O)N(c2cc(ccc12)C(=O)NCCC[NH+]1CCCCC1C)Cc1cc(ccc1C)C	K788-1210	0.875	0.503	0.396	0.18	0.052	1
O(CC)c1ccccc1CN1C(c2c(cccc2)C1=O)C(=O)NCCC[NH+]1C(CCCC1C)C	K786-5231	0.875	0.283	0.168	0.18	0.052	1
S\1c2c(N(Cc3ccccc3C)C(=O)/C/1=C\c1ccc(cc1)C(=O)NCC[NH+]1CCCCC1C)cccc2	K788-9294	0.875	0.099	-0.397	0.18	0.029	1
S\1c2c(N(Cc3cc(ccc3)C)C(=O)/C/1=C\c1ccc(cc1)C(=O)NCC[NH+]1CCCCC1C)cccc2	K788-7971	0.875	0.061	-0.4	0.18	0.029	1
O\1c2c(N(Cc3cc(ccc3)C)C(=O)/C/1=C\c1ccc(cc1)C(=O)NCC[NH+]1CCCCC1C)cccc2	C700-0333	0.875	0.037	-0.456	0.18	0.029	1
O=C1N(Cc2c1cccc2)C(CC(C)C)C(=O)NCC1CC[NH+](CC1)Cc1cc(ccc1C)C	E612-1030	0.875	0.759	0.727	0.18	0.022	1
O1CC[NH+](CC1)CCCN1C(Cn2c(cc3c2cccc3)C1=O)(C(=O)NC1CCCCCCC1)C	E234-1684	0.875	0.473	0.393	0.18	0.022	1
O1CC[NH+](CC1)CCCN1C(Cn2c(ccc2-c2ccccc2)C1=O)(C(=O)NC1CCCCCC1)C	E636-0565	0.875	0.473	0.393	0.18	0.022	1
O=C1N(Cc2ccc(cc2)C)C(c2c1cccc2)C(=O)NCCC[NH+]1C(CCCC1C)C	K786-1357	0.875	0.294	0.242	0.18	0.022	1
Clc1ccc(cc1)CCN1C(C[NH+]2C(Cc3c(C2)cccc3)C1=O)(C(=O)NC1CCCCCC1)C	E519-0132	0.875	0.346	0.155	0.179	0.587	1
Clc1cc2cc([nH]c2cc1)C(=O)N1CCC(CC1)CC(=O)NCCC[NH+]1CCCCC1CC	L075-1004	0.875	0.628	0.701	0.179	0.04	1
O(C)c1cc(N2C=C(c3c(cccc3)C2=O)C(=O)NCCC[NH+]2C(CCCC2C)C)ccc1	E456-2321	0.875	0.278	0.201	0.157	0.601	1
O(C)c1cc2n3c(cc2cc1)C(=O)N(CC[NH+]1CCCCC1C)C(C3)(C(=O)NC1CCCCCC1)C	E234-1469	0.875	0.298	0.136	0.157	0.601	1
O(C)c1cc2n3c(cc2cc1)C(=O)N(CC[NH+]1CCCCCC1)C(C3)(C(=O)NC1CCCCCC1)C	E234-1465	0.875	0.326	0.215	0.157	0.585	1
O(C)c1cc2n3c(cc2cc1)C(=O)N(CCC[NH+]1CCCCC1C)C(C3)(C(=O)NC1CCCCC1)C	E234-0240	0.875	0.448	0.206	0.157	0.585	1
O(C)c1cc2n3c(cc2cc1)C(=O)N(CC[NH+]1CCCCC1C)C(C3)(C(=O)NC1CCCCC1)C	E234-0248	0.875	0.298	0.195	0.157	0.585	1
O(C)c1cc2n3c(cc2cc1)C(=O)N(CCC[NH+]1CCCCC1)C(C3)(C(=O)NC1CCCCC1)C	E234-0238	0.875	0.476	0.278	0.157	0.583	1
O(C)c1cc2n3c(cc2cc1)C(=O)N(CC[NH+]1CCCCCC1)C(C3)(C(=O)NC1CCCCC1)C	E234-0243	0.875	0.326	0.278	0.157	0.583	1
O(C)c1cc2n3c(cc2cc1)C(=O)N(CCC[NH+]1CCCCCC1)C(C3)(C(=O)NC1CCCCC1)C	E234-0239	0.875	0.476	0.215	0.157	0.583	1
O(C)c1cc2n3c(cc2cc1)C(=O)N(CCC[NH+]1CCCCC1)C(C3)(C(=O)NC1CCCCCC1)C	E234-1463	0.875	0.476	0.215	0.157	0.583	1
O(C)c1cc2n3c(cc2cc1)C(=O)N(C(C3)(C(=O)NCCC[NH+]1CC(CC(C1)C)C)C)C1CCCCC1	C800-0219	0.875	0.476	0.497	0.157	0.538	1
O(C)c1cc2n3c(cc2cc1)C(=O)N(CCC[NH+]1CC(CC(C1)C)C)C(C3)(C(=O)NC1CCCCCC1)C	C795-0857	0.875	0.448	0.206	0.157	0.538	1
s1c2c(n3c(c2)C(=O)N(CC[NH+](C)C2CCCCC2)C(C3)(C(=O)NC2CCCCC2)C)cc1CC	E021-1226	0.875	0.065	-0.061	0.157	0.526	1
s1c2c(n3c(c2)C(=O)N(CC[NH+](C)C2CCCCC2)C(C3)(C(=O)NC2CCCCCCC2)C)cc1	E021-0738	0.875	0.377	0.257	0.157	0.486	1
s1c2c(n3c(c2)C(=O)N(CCC[NH+]2CCCCC2C)C(C3)(C(=O)NC2CCCCC2)C)cc1CC	E021-1216	0.875	0.168	0.06	0.157	0.486	1
s1c2c(n3c(c2)C(=O)N(CC[NH+]2CCCCCC2)C(C3)(C(=O)NC2CCCCCC2)C)cc1CC	E021-0941	0.875	0.057	-0.016	0.157	0.486	1
s1c2c(n3c(c2)C(=O)N(CC[NH+]2CCCCCC2)C(C3)(C(=O)NC2CCC(CC2)C)C)cc1CC	E021-1442	0.875	0.036	-0.016	0.157	0.486	1
s1c2c(n3c(c2)C(=O)N(CCC[NH+]2CCCCC2)C(C3)(C(=O)NC2CCC(CC2)C)C)cc1CC	E021-1440	0.875	0.226	0.12	0.157	0.47	1
s1c2c(n3c(c2)C(=O)N(CCC[NH+]2CCCCC2)C(C3)(C(=O)NC2CCCCCC2)C)cc1CC	E021-0939	0.875	0.226	0.114	0.157	0.47	1
s1c2c(n3c(c2)C(=O)N(CCC[NH+]2CC(CC(C2)C)C)C(C3)(C(=O)NC2CCCCCC2)C)cc1CC	C794-0376	0.875	0.196	0.113	0.157	0.441	1
S1c2c(cccc2)C(=Nc2cc(ccc12)C(=O)NCCC[NH+]1CCCCC1CC)CC	C304-0290	0.875	0.795	0.692	0.157	0.361	1
O(C)c1cc2c(n(cc2C[NH+]2CCC(CC2)C(=O)NC(CCc2ccccc2)C)CC)cc1	L589-1394	0.875	0.72	0.72	0.157	0.319	1
O(C)c1cc2c(n(cc2C[NH+]2CCC(CC2)C(=O)NC(C)c2ccccc2)CC)cc1	L589-1350	0.875	0.385	0.345	0.157	0.284	1
O(C)c1cc2c(n(cc2C[NH+]2CCC(CC2)C(=O)NCC(C)c2ccccc2)CC)cc1	L589-1378	0.875	0.319	0.286	0.157	0.284	1
O=C(NCCC[NH+]1CCCCC1CC)CCc1c2c(n(c1)Cc1ccccc1C)cccc2	E542-2779	0.875	0.795	0.729	0.157	0.256	1
o1nc(cc1-c1cc2CCCCc2cc1)C(=O)NCC([NH+]1CCCC1)c1ccc(OC)cc1	D486-0222	0.875	0.512	0.721	0.157	0.235	1
o1nc(cc1-c1ccc(OC)cc1)C(=O)NCC([NH+]1CCCCCC1)c1ccc(cc1)C	D459-0143	0.875	0.315	0.33	0.157	0.233	1
o1nc(cc1-c1cc2CCCCc2cc1)C(=O)NCC([NH+]1CCCCC1)c1ccc(OC)cc1	D647-0274	0.875	0.498	0.721	0.157	0.214	1
S1c2c(cccc2)C(=Nc2cc(ccc12)C(=O)NCCC[NH+]1CCCCC1CC)CCC	C304-0409	0.875	0.795	0.723	0.157	0.189	1
S1c2c(cc(cc2)C)C(=Nc2cc(ccc12)C(=O)NCCC[NH+]1CCCCC1C)CCC	C304-1362	0.875	0.706	0.721	0.157	0.189	1
S1c2c(cc(cc2)C)C(=Nc2cc(ccc12)C(=O)NCCC[NH+]1CCCCC1CC)CCC	K783-5161	0.875	0.795	0.721	0.157	0.183	1
S(c1ccc(cc1)CC)c1nc2c(cccc2)c(c1)C(=O)NCC[NH+]1C(CCCC1C)C	K786-9023	0.875	0.042	0.082	0.157	0.139	1
o1nc(cc1-c1cc2CCCCc2cc1)C(=O)NCC([NH+]1CCCCC1)c1ccccc1	D647-0270	0.875	0.219	0.28	0.157	0.115	1
O=C(NC(CCc1ccccc1)C)C1CC[NH+](CC1)Cc1c2c(n(CC)c1C)cccc2	L589-3195	0.875	0.72	0.72	0.157	0.08	1
s1cccc1C([NH+]1CCCCCC1)CNC(=O)c1noc(c1)-c1cc2CCCCc2cc1	D491-5015	0.875	0.226	0.353	0.157	0.079	1
O=C(NCCC[NH+](C)C1CCCCC1)c1ccc(cc1)-c1cc2CCN(c2cc1)C(=O)CC	L413-0165	0.875	0.779	0.79	0.157	0.058	1
O=C(NCCC[NH+](C)C1CCCCC1)c1ccc(cc1)-c1cc2CCN(c2cc1)C(=O)C	L413-0552	0.875	0.779	0.79	0.157	0.045	1
O1CC[NH+](CC1)CCC(=O)N1c2cc(NC(=O)C(CCC)CCC)ccc2CCc2c1cccc2	3966-0061	0.875	0.342	0.261	0.157	0.038	1
O1CC[NH+](CC1)CC(=O)N1c2cc(NC(=O)C(CCC)CCC)ccc2CCc2c1cccc2	4119-0011	0.875	0.245	0.101	0.157	0.038	1
O(C)c1cc(ccc1)-c1n(c2CCCCCc2c1)-c1ccc(cc1)C(=O)NCC[NH+]1CCCCC1C	L123-0459	0.875	0.684	0.669	0.157	0.022	1
O=C(NCCC[NH+]1CCC(CC1)Cc1ccccc1)c1ccc(-n2c3CCC(Cc3cc2C)C)cc1	E644-0502	0.875	0.479	0.446	0.157	0.015	1
s1cccc1C1N(C2CCCC2)C(=O)c2c(cccc2)C1C(=O)NCCC[NH+]1CCCCC1C	E456-1358	0.875	0.341	0.309	0.156	0.022	1
s1cccc1C1N(C2CCCC2)C(=O)c2c(cccc2)C1C(=O)NCCC[NH+]1CCCCC1	E456-1355	0.875	0.082	0.309	0.156	0.022	1
s1cccc1C1N(C2CCCC2)C(=O)c2c(cccc2)C1C(=O)NCCC[NH+]1CC(CCC1)C	E456-1298	0.875	0.341	0.301	0.156	0.022	1
O=C1N(Cc2c1nc1c(cccc1)c2C(=O)NCCC[NH+]1CCCCC1CC)C1CCCCC1	G211-0094	0.875	0.449	0.201	0.156	0.022	1
s1cccc1C1N(C2CCCC2)C(=O)c2c(cccc2)C1C(=O)NCCC[NH+](CCCC)CC	E456-1212	0.875	0.043	0.117	0.156	0.022	1
s1cccc1C1N(C2CCCC2)C(=O)c2c(cccc2)C1C(=O)NCCC[NH+](CCC)CCC	E456-1124	0.875	0.043	0.103	0.156	0.022	1
s1cccc1C1N(C2CCCC2)C(=O)c2c(cccc2)C1C(=O)NCC[NH+](CCC)CCC	E456-1123	0.875	0.041	0.022	0.156	0.022	1
s1cccc1C1N(C2CCCC2)C(=O)c2c(cccc2)C1C(=O)N1CCC([NH+]2CCCCC2)CC1	E456-1185	0.875	0.148	0.145	0.156	0.001	1
O=C1N(c2ccc(cc2)C)C(=NC1Cc1ccccc1)N1CCC([NH+]2CCCCC2)CC1	G218-3998	0.875	0.275	0.373	0.139	0.263	1
Clc1cc(ccc1)C[NH+]1CCC(CC1)CNC(=O)C1CCCc2c1[nH]c1c2cccc1	L345-0227	0.875	0.428	0.495	0.138	0.225	1
O1CC[NH+](CC1)Cc1ccc(N2C(Cn3c(cc4c3cccc4)C2=O)(C(=O)NC2CCCC2)C)cc1	E234-1137	0.875	0.396	0.209	0.138	0.031	1
Clc1cc(C)c(N2C(=O)C(N=C2N2CCC([NH+]3CCCCC3)CC2)Cc2ccccc2)cc1	G218-3605	0.875	0.525	0.402	0.137	0.465	1
O=C1N(c2cc(C)c(cc2)C)C(=NC1Cc1ccccc1)N1CCC([NH+]2CCCCC2)CC1	G218-4094	0.875	0.538	0.402	0.136	0.465	1
O=C1N(c2ccc(cc2C)C)C(=NC1Cc1ccccc1)N1CCC([NH+]2CCCCC2)CC1	G218-4144	0.875	0.525	0.402	0.136	0.465	1
O=C1N(c2cc(cc(c2)C)C)C(=NC1Cc1ccccc1)N1CCC([NH+]2CCCCC2)CC1	G218-4396	0.875	0.525	0.402	0.136	0.465	1
s1c2c(n3c(c2)C(=O)N(CC[NH+](C)C2CCCCC2)C(C3)(C(=O)NC2CCCCCC2)C)cc1	E021-0860	0.875	0.377	0.257	0.115	0.47	1
s1c2c(n3c(c2)C(=O)N(CCC[NH+]2CCCCC2)C(C3)(C(=O)NC2CCCCC2)C)cc1CC	E021-1214	0.875	0.226	0.12	0.115	0.468	1
s1c2c(n3c(c2)C(=O)N(CC[NH+]2CCCC2)C(C3)(C(=O)NC2CCCCCC2)C)cc1CC	E021-0942	0.875	0.057	0.026	0.115	0.468	1
s1c2c(n3c(c2)C(=O)N(CC[NH+](C)C2CCCCC2)C(C3)(C(=O)NC2CCC(CC2)C)C)cc1	E021-0256	0.875	0.385	0.279	0.115	0.299	1
s1c2c(n3c(c2)C(=O)N(CC[NH+](C)C2CCCCC2)C(C3)(C(=O)NC2CCCCC2)C)cc1	E021-0128	0.875	0.385	0.279	0.115	0.297	1
O(C)c1cc2c(n(cc2C[NH+]2CCC(CC2)C(=O)NC2CCCc3c2cccc3)CC)cc1	L589-1438	0.875	0.795	0.751	0.115	0.282	1
O=C(NC1CCCc2c1cccc2)C1CC[NH+](CC1)Cc1c2c(n(c1)CC)cccc2	L589-2972	0.875	0.795	0.587	0.115	0.23	1
O=C(NC1CCCc2c1cccc2)C1CC[NH+](CC1)Cc1c2c(n(CC)c1C)cccc2	L589-3240	0.875	0.795	0.609	0.115	0.183	1
O=C1N(Cc2ccccc2)C(C[NH+]2C1Cc1c(C2)cccc1)(C(=O)NC1CCCCCC1)C	E519-0128	0.875	0.188	0.08	0.114	0.493	1
O=C1N(Cc2c1nc1c(cccc1)c2C(=O)NCCC[NH+]1CCCCC1C)C1CCCCC1	G211-0289	0.875	0.449	0.269	0.114	0.022	1
s1cccc1C1N(C2CCCC2)C(=O)c2c(cccc2)C1C(=O)NCC[NH+]1CCCCC1C	E456-1296	0.875	0.108	0.013	0.114	0.022	1
Clc1ccc(cc1)C[NH+]1CCC(CC1)CNC(=O)c1cc2nc3n(CCC(C3)C)c2cc1	G730-0604	0.875	0.701	0.751	0.113	0.282	1
Clc1cc2c(n(cc2C[NH+]2CCC(CC2)C(=O)NC2CCCc3c2cccc3)C)cc1	L589-2713	0.875	0.741	0.586	0.113	0.23	1
Clc1c2cc(n3CC(Oc(c23)cc1)CC)C(=O)NCCC[NH+]1CCc2c(C1)cccc2	E762-2400	0.875	0.076	0.068	0.113	0.18	1
O1CCC2(CC1(C)C)CCC[NH+](C2)CC=1NC(=O)C2=C(N=1)c1c(CC23CCCCC3)cccc1	4222-0165	0.875	0.093	0.236	0.108	0.339	1
O=C1N(CCC[NH+]2CC[NH+](CC2)C)C(Cn2c1cc1c2cccc1)(C(=O)NC1CCCCCCC1)C	E234-1696	0.875	0.377	0.346	0.067	0.701	1
s1c2ncccc2nc1N1CC(CCC1)C(=O)NCCC[NH+]1CCC(CC1)Cc1ccccc1	G340-0929	0.875	0.626	0.634	0.042	0.49	1
O=C1N(CCOC)C(C(c2c1cccc2)C(=O)NCCC[NH+]1CCCCCC1)c1c2c(n(c1)C)cccc2	C294-0581	0.875	0.22	0.198	0.042	0.469	1
S1c2cc(ccc2-n2cc(nc12)-c1ccc(OC)cc1)C(=O)NCCC[NH+]1C(CCCC1C)C	E235-0495	0.856	0.602	0.69	0.157	0.116	1
O(C)c1ccc(cc1)CN1C(Cn2c(cc3c2cc(OC)cc3)C1=O)(C(=O)NCCC[NH+]1CC(CC(C1)C)C)C	E522-0098	0.854	0.396	0.346	0.456	0.487	1
O(C)c1cc(ccc1)CN1C(Cn2c(cc3c2cc(OC)cc3)C1=O)(C(=O)NCCC[NH+]1CC(CC(C1)C)C)C	E522-0105	0.854	0.395	0.346	0.456	0.487	1
O(C)c1ccccc1CN1C(Cn2c(cc3c2cc(OC)cc3)C1=O)(C(=O)NCCC[NH+]1CC(CC(C1)C)C)C	E522-0104	0.854	0.395	0.337	0.456	0.487	1
O(C)c1c(cccc1OC)CN1C(Cn2c(cc3c2cccc3)C1=O)(C(=O)NCCC[NH+]1CC(CC(C1)C)C)C	E522-0143	0.854	0.395	0.337	0.456	0.487	1
O(CC)c1ccc(cc1)CN1C(Cn2c(cc3c2cc(OC)cc3)C1=O)(C(=O)NCCC[NH+]1CC(CC(C1)C)C)C	E522-0114	0.854	0.396	0.346	0.456	0.414	1
O(CC)c1ccccc1CN1C(Cn2c(cc3c2cc(OC)cc3)C1=O)(C(=O)NCCC[NH+]1CC(CC(C1)C)C)C	E522-0112	0.854	0.395	0.346	0.456	0.414	1
O(C(C)C)c1ccc(cc1)CN1C(Cn2c(cc3c2cc(OC)cc3)C1=O)(C(=O)NCCC[NH+]1CC(CC(C1)C)C)C	E522-0118	0.854	0.308	0.346	0.456	0.414	1
O(C)c1cc2n3c(cc2cc1)C(=O)N(Cc1ccc(cc1)C)C(C3)(C(=O)NCCC[NH+]1CC(CC(C1)C)C)C	E522-0099	0.854	0.396	0.346	0.181	0.538	1
O(C)c1cc2n3c(cc2cc1)C(=O)N(Cc1ccccc1C)C(C3)(C(=O)NCCC[NH+]1CC(CC(C1)C)C)C	E522-0117	0.854	0.395	0.308	0.181	0.538	1
Clc1ccc(cc1)CN1C(Cn2c(cc3c2cc(OC)cc3)C1=O)(C(=O)NCCC[NH+]1CC(CC(C1)C)C)C	E522-0095	0.854	0.316	0.237	0.179	0.538	1
Clc1cc(ccc1)CN1C(Cn2c(cc3c2cc(OC)cc3)C1=O)(C(=O)NCCC[NH+]1CC(CC(C1)C)C)C	E522-0091	0.854	0.315	0.23	0.179	0.538	1
Clc1ccccc1CN1C(Cn2c(cc3c2cc(OC)cc3)C1=O)(C(=O)NCCC[NH+]1CC(CC(C1)C)C)C	E522-0094	0.854	0.315	0.2	0.179	0.538	1
s1cccc1C1N(CC(C)C)C(=O)c2c(cccc2)C1C(=O)NCC[NH+](C)C1CCCCC1	E456-0963	0.854	0.188	0.112	0.157	0.546	1
s1cccc1C1N(CC(C)C)C(=O)c2c(cccc2)C1C(=O)N1CC[NH+](CC1)C1CCCCC1	E456-0836	0.854	0.163	0.089	0.156	0.022	1
o1cccc1-c1n2c(cc1)C(=O)N(CCC[NH+](Cc1ccccc1)C)C(C2)(C(=O)NC1CCCC1)C	E533-0349	0.852	0.176	0.002	0.181	0.587	1
o1cccc1C[NH+](CCCNC(=O)C=1c2c(cccc2)C(=O)N(C=1)c1ccc(OC)cc1)C1CCCC(C)C1C	E456-1689	0.852	0.214	-0.212	0.181	0.558	1
o1c(nc(C[NH+]2CC(CCC2)C(=O)NC2CCCc3c2cccc3)c1C)-c1ccc(OC)cc1	C522-3112	0.852	0.594	0.462	0.181	0.396	1
O=C1N(CC(=O)NC(CCc2ccccc2)C)C(=NC2=C1CC[NH+](C2)Cc1ccccc1)CCC	C201-1876	0.852	0.638	0.521	0.181	0.391	1
S=C1N(C(=O)C(N1CCC[NH+]1CCC(CC1)Cc1ccccc1)CC(=O)Nc1ccc(OCC)cc1)c1ccc(OC)cc1	C089-0479	0.852	0.317	-0.094	0.181	0.291	1
S=C1N(C(=O)C(N1CCC[NH+]1CCC(CC1)Cc1ccccc1)CC(=O)Nc1ccc(OCCC)cc1)c1ccc(OC)cc1	C089-0480	0.852	0.353	-0.094	0.181	0.204	1
o1c(nc(C[NH+]2CCC(CC2)C(=O)NC(C)c2ccc(OCCCC)cc2)c1C)-c1ccc(cc1)CC	K788-7072	0.852	0.722	0.719	0.181	0.141	1
O=C1N(c2n(-c3c1cccc3)c(nn2)CCC(=O)NCCC[NH+]1CCC(CC1)C)CCc1ccccc1	C741-0798	0.852	0.545	0.55	0.181	0.093	1
O1c2c(-c3n(C)c(cc3C1=O)C(=O)NCCC[NH+]1CCC(CC1)Cc1ccccc1)cccc2	F210-0207	0.852	0.321	0.288	0.181	0.073	1
S(Cc1nc(oc1C)-c1cc(OC)ccc1)CC(=O)NCCC[NH+]1CCC(CC1)Cc1ccccc1	C523-0381	0.852	0.715	0.699	0.181	0.058	1
O=C1N(c2n(-c3c1cccc3)c(nn2)CCC(=O)NCCC[NH+]1CCC(CC1)C)Cc1ccc(cc1)C	C741-0462	0.852	0.626	0.639	0.181	0.053	1
O=C1N(c2n(-c3c1cccc3)c(nn2)CCC(=O)NCCC[NH+]1CCCCCC1)Cc1ccccc1	C741-0068	0.852	0.262	0.612	0.181	0.053	1
O=C1N(c2n(-c3c1cccc3)c(nn2)CCC(=O)NC1CC[NH+](CC1)Cc1ccccc1)CCCOC(C)C	C741-1185	0.852	0.485	0.611	0.181	0.053	1
O=C1N(CCc2ccccc2)C(=Nc2c1ccc(c2)C(OC)=O)N1CC[NH+](CC1)C1CCCCC1	M124-0182	0.852	0.283	0.246	0.181	0.052	1
o1c(nnc1C[NH+]1CCC(CC1)C)-c1c2c(n(c1)CC(=O)NCc1ccc(N(C)C)cc1)cccc2	L494-0400	0.852	0.174	0.063	0.181	0.027	1
o1c2c(cccc2)c(NC(=O)Cc2cc(ccc2)C)c1C(=O)N1CCC([NH+]2CCCCC2)CC1	E957-0724	0.852	0.632	0.579	0.181	0.003	1
O=C1N(c2n(-c3c1cccc3)c(nn2)CCC(=O)NC1CC[NH+](CC1)Cc1ccccc1)CCC(C)C	C741-1109	0.852	0.447	0.575	0.181	0.002	1
O=C1N(c2n(-c3c1cccc3)c(nn2)CCC(=O)NC1CC[NH+](CC1)Cc1ccccc1)CC(C)C	C741-1027	0.852	0.387	0.575	0.181	0.002	1
o1c2c(cccc2)c(NC(=O)C(Oc2ccccc2)C)c1C(=O)N1CCC([NH+]2CCCCC2)CC1	E957-0122	0.852	0.429	0.531	0.18	0.065	1
o1cccc1C[NH+](C(CC)C)CCNC(=O)c1c2c(nc3c1cccc3)C(=O)N(C2)C1CCCCC1	G211-0282	0.852	0.45	0.302	0.18	0.06	1
o1c2c(nc1-c1ccc(cc1)C)cc(cc2)C(=O)N1CCC(CC1)C(C(=O)NCC[NH+]1CCCCC1C)C	L249-1638	0.852	0.585	0.667	0.18	0.043	1
o1c2cc(ccc2nc1-c1ccccc1)C(=O)N1CCC(CC1)CC(=O)NCC[NH+]1CCCCC1C	L250-1083	0.852	0.675	0.624	0.18	0.043	1
o1c2cc(ccc2nc1-c1ccccc1)C(=O)N1CCC(CC1)CC(=O)NCCC([NH+]1CCCC1)C	L250-1096	0.852	0.759	0.624	0.18	0.042	1
O=C1N(c2ncccc2-n2c1ccc2)Cc1cc(ccc1)C(=O)NCCC[NH+]1CCCCC1CC	F752-0161	0.852	0.164	0.226	0.18	0.029	1
O=C1N(c2ncccc2-n2c1ccc2)Cc1cc(ccc1)C(=O)NCCC[NH+]1CC(CCC1)C	F752-0174	0.852	-0.065	0.068	0.18	0.029	1
s1cccc1C1N(CC(C)C)C(=O)c2c(cccc2)C1C(=O)NCCC[NH+](Cc1occc1)C1CCCC1	E456-1003	0.852	0.114	-0.1	0.18	0.011	1
o1c2c(n3c(c2)C(=O)N(CC[NH+](C)C2CCCCC2)C(C3)(C(=O)NC2CCCCCCC2)C)cc1C	E218-1606	0.852	0.373	0.103	0.157	0.509	1
o1cccc1C[NH+](CCCNC(=O)c1noc-2c1COc1c-2cccc1)C1CCCC(C)C1C	E146-0527	0.852	0.692	0.682	0.157	0.411	1
o1cccc1-c1n2c(cc1)C(=O)N(CCC[NH+](C)C1CCCCC1)C(C2)(C(=O)NC1CCCCC1)C	E533-0121	0.852	0.503	0.365	0.157	0.397	1
o1cccc1-c1n2c(cc1)C(=O)N(CCC[NH+](C)C1CCCCC1)C(C2)(C(=O)NC1CCCC1)C	E533-0368	0.852	0.511	0.387	0.157	0.395	1
o1c(nc(C[NH+]2CCC(CC2)C(=O)NC(CCc2ccccc2)C)c1C)-c1ccc(cc1)CC	C522-1406	0.852	0.709	0.669	0.157	0.361	1
o1c(nc(C[NH+]2CC(CCC2)C(=O)NC2CCCCCCC2)c1C)-c1ccc(cc1)CC	C522-4409	0.852	0.777	0.53	0.157	0.325	1
o1c(nc(C[NH+]2CCC(CC2)C(=O)NC2CCCc3c2cccc3)c1C)-c1ccc(cc1)CC	C522-1396	0.852	0.783	0.7	0.157	0.152	1
o1cccc1-c1n2c(cc1)C(=O)N(CCC[NH+]1CC(CC(C1)C)C)C(C2)(C(=O)NC1CCCCC1)C	E533-0115	0.852	0.441	0.361	0.156	0.06	1
o1cccc1-c1n2c(cc1)C(=O)N(CCC[NH+]1CC(CC(C1)C)C)C(C2)(C(=O)NC1CCCC1)C	E533-0360	0.852	0.441	0.361	0.156	0.06	1
o1cccc1-c1n2c(cc1)C(=O)N(CC[NH+]1CCCCC1C)C(C2)(C(=O)NC1CCCCCCC1)C	E533-0571	0.852	0.22	0.239	0.156	0.06	1
o1cccc1-c1n2c(cc1)C(=O)N(CC[NH+]1CCCCCC1)C(C2)(C(=O)NC1CCCCCCC1)C	E533-0567	0.852	0.295	0.225	0.156	0.06	1
o1cccc1-c1n2c(cc1)C(=O)N(CC[NH+](CCCC)CC)C(C2)(C(=O)NC1CCCCCC1)C	E533-0481	0.852	0.302	0.174	0.156	0.06	1
o1cccc1-c1n2c(cc1)C(=O)N(CC[NH+](CCCC)CC)C(C2)(C(=O)NC1CCCCC1)C	E533-0114	0.852	0.301	0.174	0.156	0.06	1
o1cccc1-c1n2c(cc1)C(=O)N(CC[NH+](CCCC)CC)C(C2)(C(=O)NC1CCC(CC1)C)C	E533-0231	0.852	0.247	0.174	0.156	0.06	1
o1cccc1-c1n2c(cc1)C(=O)N(CCC[NH+](CC)CC)C(C2)(C(=O)NC1CCCCCCC1)C	E533-0551	0.852	0.247	0.174	0.156	0.06	1
S(Cc1nc(oc1C)-c1ccc(cc1)C(=O)NCCC[NH+]1C(CCCC1C)C)c1ccccc1	E776-0416	0.852	0.249	0.352	0.156	0.03	1
O=C1N(CCC[NH+]2CC(CC(C2)C)C)C(Cn2c1nc1c2cccc1)(C(=O)NC1CCCCCC1)C	E525-0905	0.852	0.323	0.231	0.156	0.027	1
O=C1N(CCC[NH+]2CCCCCC2)C(Cn2c1nc1c2cccc1)(C(=O)NC1CCCC(C)C1C)C	E525-0625	0.852	0.309	0.145	0.156	0.027	1
o1cccc1-c1n2c(cc1)C(=O)N(CCC[NH+]1CC(CC(C1)C)C)C(C2)(C(=O)NC1CCCCCC1)C	C795-0980	0.852	0.441	0.361	0.156	0.011	1
o1cccc1-c1n2c(cc1)C(=O)N(CC[NH+](CCCC)CC)C(C2)(C(=O)NC1CCCCCCC1)C	E533-0570	0.852	0.302	0.174	0.156	0.011	1
o1c2c(n3c(c2)C(=O)N(CCC[NH+]2C(CCCC2C)C)C(C3)(C(=O)NC2CCCCCCC2)C)cc1	E218-1491	0.852	0.431	0.216	0.156	0.005	1
o1c2c(n3c(c2)C(=O)N(CCC[NH+](CCC)CCC)C(C3)(C(=O)NC2CCCCCC2)C)cc1C	E218-1860	0.852	0.223	0.077	0.149	0.005	1
O=C1N(C(=O)C2C1CC(CC2)C)c1cc([N+](=O)[O-])c(NC2CC[NH+](CC2)Cc2ccccc2)cc1	K807-0723	0.852	-0.007	0.402	0.143	0.005	1
O=C1N2C(N(c3c1ccc(c3)C(=O)NC1CC[NH+](CC1)Cc1ccccc1)CC)CCCC2	S420-0549	0.852	0.424	0.573	0.138	0.029	1
o1c(nnc1C[NH+]1CCC(CC1)C)-c1c2c(n(c1)CC(=O)NCc1cc(OC)ccc1)cccc2	L494-0355	0.852	0.024	-0.06	0.124	0.053	1
o1c(nnc1C[NH+]1CCC(CC1)C)-c1c2c(n(c1)CC(=O)NCc1ccccc1OC)cccc2	L494-0354	0.852	0.174	-0.063	0.124	0.001	1
o1c2c(n3c(c2)C(=O)N(CC[NH+]2CCCCCC2)C(C3)(C(=O)NC2CCCCCCC2)C)cc1C	E218-1596	0.852	0.215	0.125	0.119	0.005	1
o1c(nc(C[NH+]2CC(CCC2)C(=O)NC2CCCc3c2cccc3)c1C)-c1cc(ccc1)C	C522-5356	0.852	0.594	0.434	0.115	0.467	1
o1c(ccc1C)C([NH+]1CCC(CC1)C)CNC(=O)c1noc(c1)-c1cc2CCCCc2cc1	D491-8277	0.852	0.783	0.728	0.115	0.421	1
Clc1cc(ccc1)-c1oc(C)c(n1)C[NH+]1CCC(CC1)C(=O)NC1CCCc2c1cccc2	C522-1924	0.852	0.32	0.428	0.113	0.467	1
Clc1cc(ccc1)-c1oc(C)c(n1)C[NH+]1CC(CCC1)C(=O)NC1CCCc2c1cccc2	C522-4960	0.852	0.238	0.351	0.113	0.467	1
Clc1ccc(cc1)-c1oc(C)c(n1)C[NH+]1CCC(CC1)C(=O)NC1CCCc2c1cccc2	C522-0736	0.852	0.294	0.428	0.113	0.283	1
Clc1ccc(cc1)-c1oc(C)c(n1)C[NH+]1CC(CCC1)C(=O)NC1CCCc2c1cccc2	C522-3772	0.852	0.238	0.351	0.113	0.283	1
Clc1ccc(cc1)-c1oc(C)c(n1)C[NH+]1CCC(CC1)C(=O)NCCC[NH+]1CCCCC1CC	C522-0761	0.852	0.759	0.706	0.064	0.067	1
o1c2c(n3c(c2)C(=O)N(CCC[NH+](Cc2ccccc2)C)C(C3)(C(=O)NC2CCCCCC2)C)cc1	E218-1718	0.852	0.421	0.36	0.042	0.515	1
o1c2c(n3c(c2)C(=O)N(CCC[NH+](Cc2ccccc2)C)C(C3)(C(=O)NC2CCCCC2C)C)cc1	E218-0671	0.852	0.388	0.35	0.042	0.515	1
o1c2c(n3c(c2)C(=O)N(CCC[NH+](Cc2ccccc2)C)C(C3)(C(=O)NC2CCCCC2)C)cc1	E218-0114	0.852	0.421	0.36	0.042	0.501	1
o1c2c(n3c(c2)C(=O)N(CC[NH+](C)C2CCCCC2)C(C3)(C(=O)NC2CCCCCCC2)C)cc1	E218-1493	0.852	0.468	0.148	0.018	0.481	1
o1c2c(n3c(c2)C(=O)N(CCC[NH+](C)C2CCCCC2)C(C3)(C(=O)NC2CCCCCC2)C)cc1	E218-1737	0.852	0.501	0.244	0.018	0.477	1
o1c2c(n3c(c2)C(=O)N(CCC[NH+](C)C2CCCCC2)C(C3)(C(=O)NC2CCCCCCC2)C)cc1	E218-1490	0.852	0.261	0.055	0.018	0.477	1
o1c2c(n3c(c2)C(=O)N(CCC[NH+](CCCC)C)C(C3)(C(=O)NC2CCCCCC2)C)cc1	E218-1733	0.852	0.326	0.085	0.018	0.438	1
o1c2c(n3c(c2)C(=O)N(CCC[NH+](C)C2CCCCC2)C(C3)(C(=O)NC2CCCCC2)C)cc1C	E218-0280	0.852	0.406	0.191	0.018	0.337	1
o1cccc1-c1n2c(cc1)C(=O)N(CCC[NH+]1CCCC1)C(C2)(C(=O)NC1CCCCCCC1)C	E533-0566	0.852	0.44	0.364	0.017	0.06	1
o1c2c(n3c(c2)C(=O)N(CCC[NH+]2CCCCC2)C(C3)(C(=O)NC2CCCCCCC2)C)cc1C	E218-1591	0.852	0.374	0.221	0.017	0.005	1
o1c2c(n3c(c2)C(=O)N(CCC[NH+]2CCCCCC2)C(C3)(C(=O)NC2CCCCCCC2)C)cc1C	E218-1592	0.852	0.374	0.221	0.017	0.005	1
o1c2c(n3c(c2)C(=O)N(CCC[NH+]2CCCCC2CC)C(C3)(C(=O)NC2CCCCCCC2)C)cc1	E218-1474	0.852	0.431	0.216	0.017	0.005	1
o1c2c(n3c(c2)C(=O)N(CCC[NH+]2CCCCC2C)C(C3)(C(=O)NC2CCCCCCC2)C)cc1	E218-1476	0.852	0.431	0.216	0.017	0.005	1
o1c2c(n3c(c2)C(=O)N(CC[NH+](CCCC)CC)C(C3)(C(=O)NC2CCCCCCC2)C)cc1	E218-1483	0.852	0.3	0.077	0.017	0.005	1
o1c2c(n3c(c2)C(=O)N(CCC[NH+](CCCC)CC)C(C3)(C(=O)NC2CCCCCC2)C)cc1	E218-1722	0.852	0.3	0.077	0.017	0.005	1
o1c2c(n3c(c2)C(=O)N(CC[NH+](CCCC)CC)C(C3)(C(=O)NC2CCCCCC2)C)cc1	E218-1728	0.852	0.3	0.077	0.017	0.005	1
o1c2c(n3c(c2)C(=O)N(CCC[NH+](CCC)CCC)C(C3)(C(=O)NC2CCCCCC2)C)cc1	E218-1727	0.852	0.3	0.063	0.017	0.005	1
o1nc(cc1-c1ccc(OCC)cc1)C(=O)NCC([NH+]1CCCCC1)c1ccc(OC)cc1	D647-0129	0.85	0.349	0.435	0.456	0.078	1
O(C)c1ccccc1Nc1nc2c(cccc2)c(c1)C(=O)NCCC[NH+]1CC(CCC1)C	C387-2091	0.85	0.412	0.39	0.206	0.235	1
Clc1cc2cc([nH]c2cc1)C(=O)N1CCC(CC1)C(C(=O)NCC[NH+](Cc1ccccc1)C)C	L075-1205	0.85	0.168	0.166	0.204	0.564	1
s1c-2c(cc1C(=O)NCC1CC[NH+](CC1)Cc1cc(ccc1)C)C(=O)N(c1c-2cccc1)C	C498-0672	0.85	0.308	0.202	0.139	0.02	1
O(C)c1cc(OC)ccc1Nc1nc2c(cccc2)c(c1)C(=O)NCCC[NH+]1CC(CC(C1)C)C	C387-0297	0.848	0.393	0.346	0.488	0.301	1
S\1c2c(NC(=O)/C/1=C\c1cc(OC)c(OC)cc1)cc(cc2)C(=O)NCCC[NH+]1CC(CC(C1)C)C	K788-8855	0.848	0.321	0.226	0.487	0.643	1
S\1c2c(NC(=O)/C/1=C\c1cc(OC)c(OC)cc1)cc(cc2)C(=O)NCCC[NH+](CC(C)C)CC(C)C	K788-8862	0.848	0.153	-0.01	0.487	0.067	1
O(C)c1ccc(OC)cc1CN1C(c2c(cccc2)C1=O)C(=O)NCCC[NH+]1CC(CC(C1)C)C	C257-0450	0.848	0.245	0.183	0.456	0.533	1
o1nc(cc1-c1cc(C)c(cc1)C)C(=O)NCC([NH+]1CCCCC1)c1cc(OC)c(OC)cc1	D647-0233	0.848	0.704	0.51	0.456	0.481	1
o1nc(cc1-c1ccc(OC)cc1)C(=O)NCC([NH+]1CCC(CC1)C)c1ccc(OC)cc1	D459-0170	0.848	0.154	0.34	0.456	0.319	1
o1nc(cc1-c1ccc(OC)cc1)C(=O)NCC([NH+]1CCC(CC1)C)c1ccccc1OC	D459-0161	0.848	0.418	0.296	0.456	0.319	1
o1nc(cc1-c1ccc(cc1)C)C(=O)NCC([NH+]1CCCCC1)c1cc(OC)ccc1OC	D647-0055	0.848	0.301	0.251	0.456	0.319	1
o1nc(cc1-c1cc(C)c(cc1)C)C(=O)NCC([NH+]1CCCCC1)c1cc(OC)ccc1OC	D647-0203	0.848	0.301	0.258	0.456	0.299	1
o1nc(cc1-c1ccc(cc1)C)C(=O)NCC([NH+]1CCCCC1)c1cc(OC)c(OC)cc1	D647-0076	0.848	0.406	0.555	0.456	0.253	1
o1nc(cc1-c1cc2OCCOc2cc1)C(=O)NCC([NH+]1CCCCC1)c1ccc(cc1)C(C)(C)C	D647-0245	0.848	0.334	0.442	0.455	0.01	1
S(C)c1ccc(cc1)C1N(C)C(=O)c2c(cc(OC)c(OC)c2)C1C(=O)NCCC[NH+](CCC)CCC	C197-0117	0.848	0.137	0.119	0.445	0.54	1
O(C)c1ccc(OC)cc1\C=C\C(=O)NCC[NH+]1CCC([NH+](C)C2CCCCC2C)CC1	C525-0837	0.848	0.617	0.409	0.389	0.171	1
O\1c2c(NC(=O)/C/1=C\c1ccccc1OC)cc(cc2)C(=O)NCCC[NH+]1CC(CCC1)C	F389-0355	0.848	0.151	0.167	0.295	0.405	1
O(C)c1cc(ccc1OC)C(NC(=O)c1n(c2CC[NH+](Cc2c1)Cc1ccccc1)C)C	P101-0891	0.848	0.352	0.317	0.261	0.214	1
O(C)c1cc(ccc1OC)C(NC(=O)C1CC[NH+](CC1)Cc1c2c(n(c1)C)cccc2)C	L589-1176	0.848	0.356	0.362	0.237	0.371	1
O=C(Nc1c(cc(cc1C)C)C)C(=O)NCC([NH+]1CCCCC1)c1cc2CCCN(c2cc1)C	F936-0710	0.848	0.227	0.23	0.206	0.819	1
O(C)c1ccccc1Nc1ncc(c2c1cccc2)C(=O)NCCC[NH+]1CC(CC(C1)C)C	C138-0816	0.848	0.286	0.287	0.206	0.363	1
O(C)c1ccccc1Nc1nc2c(cccc2)c(c1)C(=O)NCCC[NH+]1CC(CC(C1)C)C	C387-2082	0.848	0.389	0.324	0.206	0.301	1
S\1c2c(NC(=O)/C/1=C\c1ccc(OC)cc1)cc(cc2)C(=O)NCCC[NH+]1CC(CC(C1)C)C	K788-7140	0.848	0.232	0	0.205	0.464	1
Clc1cccc(NC(=O)C(=O)NCC([NH+]2CCCCC2)c2cc3CCCN(c3cc2)C)c1C	F936-0708	0.848	0.244	0.245	0.204	0.819	1
Clc1cc(NC(=O)C(=O)NCC([NH+]2CCCCC2)c2cc3CCCN(c3cc2)C)c(cc1)C	F936-0724	0.848	0.244	0.245	0.204	0.819	1
Clc1cc(NC(=O)C(=O)NCC([NH+]2CCCCC2)c2cc3CCCN(c3cc2)C)ccc1C	F936-0722	0.848	0.135	0.237	0.204	0.819	1
S\1c2c(NC(=O)/C/1=C\c1cc(ccc1)C)cc(cc2)C(=O)NCCC[NH+]1CC(CC(C1)C)C	C700-0653	0.848	0.277	0.086	0.204	0.04	1
Clc1cc2c(NC(=O)C(N3CC(CCC3)C(=O)NCCC[NH+](CC)CC)=C2c2ccccc2)cc1	F487-0482	0.848	0.266	0.341	0.203	0.063	1
O(C)c1cc2[nH]c(cc2cc1)C(=O)N1CCC(CC1)C(C(=O)NCCC([NH+]1CCCCCC1)C)C	L075-0835	0.848	0.5	0.608	0.182	0.406	1
O(C)c1ccc(cc1)C1N(C)C(=O)c2c(cccc2)C1C(=O)NCCC[NH+](CCC)CCC	C096-1235	0.848	0.137	0.126	0.181	0.641	1
O(C)c1ccc(cc1)C1N(C)C(=O)c2c(cccc2)C1C(=O)NCCC[NH+]1CC(CC(C1)C)C	C096-1230	0.848	0.052	-0.011	0.181	0.624	1
S\1c2c(N(CC(=O)NCCC[NH+]3CC(CC(C3)C)C)C(=O)/C/1=C\c1ccc(cc1)CC)cccc2	C312-1752	0.848	0.384	0.33	0.181	0.601	1
O(C)c1ccc(cc1)CN1C(c2c(cccc2)C1=O)C(=O)NCCC[NH+]1CC(CC(C1)C)C	C257-0422	0.848	0.395	0.323	0.181	0.583	1
O=C(N1CCCCC1)C1[NH+](CCc2c1cccc2)CC(=O)NC(C)c1ccc(cc1C)C	P099-0592	0.848	0.24	0.119	0.181	0.546	1
O=C(N1CCC(CC1)C)C1[NH+](CCc2c1cccc2)CC(=O)NCc1cc(C)c(cc1)C	P099-0739	0.848	0.1	0.011	0.181	0.546	1
O=C(N1CCC(CC1)C)C1[NH+](CCc2c1cccc2)CC(=O)NCc1cc(ccc1C)C	P099-0753	0.848	0.1	0.011	0.181	0.546	1
O=C(N1CCC(CC1)C)C1[NH+](CCc2c1cccc2)CC(=O)NC(C)c1ccc(cc1C)C	P099-0757	0.848	0.088	-0.013	0.181	0.546	1
s1cccc1CN1C(Cn2c(cc3c2cc(OC)cc3)C1=O)(C(=O)NCCC[NH+]1CC(CC(C1)C)C)C	E522-0109	0.848	0.285	0.308	0.181	0.522	1
O=C(N1CC(CCC1)c1cc(ccc1)C(=O)NCC[NH+](CC)CC)c1ccc(cc1)CC	F925-0783	0.848	0.184	0.091	0.181	0.34	1
O=C(NCC[NH+]1CCN(CC1)c1cccc(C)c1C)c1ccc(cc1)-c1cc2CCN(c2cc1)C(=O)C	L413-0571	0.848	0.006	0.041	0.181	0.033	1
O=C1N(c2cc(C)c(cc2)C)C(=NC1Cc1ccccc1)N1CC[NH+](CC1)CCn1c(ccc1C)C	G218-4108	0.848	-0.004	0.027	0.181	0.005	1
O=C1N(c2ccc(cc2C)C)C(=NC1Cc1ccccc1)N1CC[NH+](CC1)CCn1c(ccc1C)C	G218-4158	0.848	0.073	0.024	0.181	0.005	1
S\1c2c(N(C)C(=O)/C/1=C\c1ccccc1OC)cc(cc2)C(=O)NCCC[NH+]1CC(CC(C1)C)C	C310-1257	0.848	0.357	0.273	0.18	0.641	1
o1nc(cc1-c1ccc(OC)cc1)C(=O)NCC([NH+]1CCOCC1)c1ccc(cc1)C(C)(C)C	D647-0090	0.848	0.242	0.083	0.18	0.314	1
S\1c2c(N(CC(=O)NCCC[NH+]3CC(CCC3)C)C(=O)/C/1=C\c1ccc(cc1)C)cccc2	C312-0598	0.848	0.38	0.365	0.18	0.052	1
S\1c2c(N(CC(=O)NCCC[NH+]3CC(CC(C3)C)C)C(=O)/C/1=C\c1ccc(cc1)C)cccc2	C312-0591	0.848	0.345	0.304	0.18	0.052	1
S\1c2c(N(C)C(=O)/C/1=C/c1ccc(OC)cc1)cc(cc2)C(=O)NCCC[NH+](CC(C)C)CC(C)C	C310-1133	0.848	0.188	0.103	0.18	0.042	1
O=C1N(Cc2c1cccc2)C(C(C)C)C(=O)NCC1CC[NH+](CC1)Cc1cc(ccc1C)C	E612-0823	0.848	0.398	0.347	0.18	0.022	1
s1cccc1CN1C(Cn2c(cc3c2cccc3)C1=O)(C(=O)NCCC[NH+]1CC(CC(C1)C)C)C	E522-0139	0.848	0.128	0.134	0.18	0.022	1
S1CC(=O)N(c2cc(ccc12)C(=O)NCC(C[NH+]1CCC(CC1)C)C)Cc1cc(ccc1C)C	C122-0464	0.848	0.394	0.328	0.179	0.052	1
S1CC(=O)N(c2cc(ccc12)C(=O)NCCC[NH+]1CC(CC(C1)C)C)Cc1cc(ccc1C)C	C122-0458	0.848	0.356	0.322	0.179	0.052	1
Clc1cc2cc([nH]c2cc1)C(=O)N1CCC(CC1)C(C(=O)NCCC[NH+]1CCCCCC1)C	L075-1200	0.848	0.558	0.679	0.179	0.04	1
Clc1cc2cc([nH]c2cc1)C(=O)N1CCC(CC1)C(C(=O)NCCC[NH+]1CCCCC1C)C	L075-1201	0.848	0.467	0.64	0.179	0.04	1
Clc1cc2cc([nH]c2cc1)C(=O)N1CCC(CC1)C(C(=O)NCCC([NH+]1CCCCCC1)C)C	L075-1236	0.848	0.467	0.64	0.179	0.04	1
o1nc(cc1-c1ccc(OCC)cc1)C(=O)NCC([NH+]1CCOCC1)c1ccc(cc1)C(C)(C)C	D647-0123	0.848	0.211	0.073	0.179	0.026	1
Clc1cc2cc([nH]c2cc1)C(=O)N1CCC(CC1)C(C(=O)NCCC[NH+]1CC(CCC1)C)C	L075-1211	0.848	0.467	0.64	0.178	0.04	1
S\1c2c(N(C)C(=O)/C/1=C/c1ccccc1C)cc(cc2)C(=O)NCCC[NH+]1CC(CC(C1)C)C	C310-2313	0.848	0.357	0.256	0.177	0.601	1
Clc1cc(N2CC[NH+](CC2)CCCNC(=O)C2CCCc3c2[nH]c2c3cccc2)c(cc1)C	L345-0190	0.848	0.517	0.477	0.162	0.29	1
S1c2c(cccc2)C(=Nc2cc(ccc12)C(=O)NCCC[NH+]1CC(CC(C1)C)C)CC	C304-0297	0.848	0.664	0.662	0.157	0.361	1
S1c2c(cccc2)C(=Nc2cc(ccc12)C(=O)NCCC[NH+]1CC(CC(C1)C)C)CCC	C304-0416	0.848	0.664	0.662	0.157	0.361	1
S(C)c1ccc(cc1)C1N(C)C(=O)c2c(cc(OC)c(OC)c2)C1C(=O)NCCC[NH+]1CCCCCC1	C197-0109	0.848	0.18	0.132	0.157	0.348	1
O=C(NCCC[NH+]1CC(CC(C1)C)C)c1nc(n2c1CCCCC2)-c1ccc(cc1)C	E475-1084	0.848	0.444	0.391	0.157	0.344	1
O(C)c1ccc(cc1)-c1nc2c(cc(cc2)C(C)C)c(c1)C(=O)NCC1[NH+](CCC1)CC	K786-1040	0.848	0.014	-0.017	0.157	0.3	1
o1nc(cc1-c1cc(C)c(cc1)C)C(=O)NCC([NH+]1CCCCC1)c1ccc(OC)cc1	D647-0221	0.848	0.443	0.436	0.157	0.299	1
S1c2cc(ccc2-n2cc(nc12)-c1ccc(OC)cc1)C(=O)NCCC[NH+]1CC(CC(C1)C)C	E235-0486	0.848	0.358	0.223	0.157	0.277	1
S1c2cc(ccc2-n2cc(nc12)-c1ccc(cc1)CC)C(=O)NCCC[NH+]1CC(CC(C1)C)C	E235-1004	0.848	0.396	0.313	0.157	0.204	1
S(C)c1ccc(cc1)C1N(C)C(=O)c2c(cc(OC)c(OC)c2)C1C(=O)NCCC[NH+]1CC(CC(C1)C)C	C197-0112	0.848	0.052	0.124	0.156	0.54	1
S(C)c1ccc(cc1)C1N(C)C(=O)c2c(cc(OC)c(OC)c2)C1C(=O)NCC[NH+](CCCC)CC	C197-0113	0.848	0.008	-0.026	0.156	0.54	1
S(C)c1ccc(cc1)C1N(C)C(=O)c2c(cc(OC)c(OC)c2)C1C(=O)NCC[NH+](CCC)CCC	C197-0116	0.848	0.008	-0.026	0.156	0.54	1
s1cccc1C1N(CC(C)C)C(=O)c2c(cccc2)C1C(=O)NCCC[NH+]1CCCCC1C	E456-1018	0.848	0.155	0.11	0.156	0.022	1
s1cccc1C1N(CC(C)C)C(=O)c2c(cccc2)C1C(=O)NCCC[NH+]1C(CCCC1C)C	E456-0961	0.848	0.155	0.096	0.156	0.022	1
Clc1ccc(cc1)-c1nc(c2n1CCCCC2)C(=O)NCCC[NH+]1CC(CC(C1)C)C	E711-0063	0.848	0.447	0.522	0.155	0.344	1
Clc1cc2c(Sc3c(N=C2C)cc(cc3)C(=O)NCCC[NH+]2CCCCC2CC)cc1	C304-0647	0.848	0.595	0.696	0.155	0.222	1
Clc1ccc(N2C=C(c3c(cccc3)C2=O)C(=O)NCCC[NH+]2CC(CC(C2)C)C)cc1	3909-9100	0.848	-0.022	0.05	0.154	0.019	1
O(C)c1cc2n3c(cc2cc1)C(=O)N(CCC[NH+](CC)CC)C(C3)(C(=O)NC1CCCCC1)C	E234-0220	0.848	0.286	0.124	0.15	0.583	1
O(C)c1cc2n3c(cc2cc1)C(=O)N(CCC(C)C)C(C3)(C(=O)NCCC[NH+]1CC(CC(C1)C)C)C	E522-0102	0.848	0.353	0.259	0.149	0.538	1
O(C)c1cc2c([nH]cc2C[NH+]2CCC(CC2)C(=O)NC(C)c2ccc(cc2C)C)cc1	L589-1689	0.848	0.23	0.184	0.14	0.293	1
s1c2c(nc1N1CC(CCC1)C(=O)NCCC[NH+]1CCc3c(C1)cccc3)c(cc(c2)C)C	C782-1590	0.848	0.757	0.715	0.139	0.353	1
Clc1cc(N2CC[NH+](CC2)CC(=O)N2C3CCCc4c3n(CC2)c2c4cc(cc2)C)ccc1	8015-7327	0.848	0.42	0.359	0.137	0.195	1
s1c2c(n3c(c2)C(=O)N(CC[NH+]2CCCC2)C(C3)(C(=O)NC2CCC(CC2)C)C)cc1CC	E021-1443	0.848	0.038	0.009	0.115	0.468	1
Clc1cc2c(Sc3c(N=C2C)cc(cc3)C(=O)NCCC[NH+]2CC(CC(C2)C)C)cc1	C304-0654	0.848	0.394	0.313	0.112	0.361	1
O=C(NCC[NH+]1CCC([NH+](C)C2CCCCC2C)CC1)\C=C\c1ccc(N(CC)CC)cc1	C525-1607	0.848	0.654	0.41	0.067	0.334	1
[NH+]=1c2c(-c3n(nc(n3)CCn3c4c(nc3C)cccc4)C=1NCC[NH+]1C(CCCC1C)C)cccc2	C736-0500	0.844	0.116	-0.249	0.206	0.003	1
O=C(Nc1cc2c(nc(N3CCCCC3)cc2C)cc1)CCC(=O)NCCC[NH+]1CC(CC(C1)C)C	C227-0112	0.826	0.491	0.485	0.205	0.071	1
O=C1N(c2c(N=C1c1ccc(cc1)C(=O)NCC[NH+]1CCCCC1C)cccc2)CC(C)C	M049-1702	0.826	0.362	0.284	0.181	0.601	1
O=C1N(c2n(-c3c1cccc3)c(nn2)CCC(=O)NCCC[NH+]1CC(N(CC1)c1cc(ccc1)C)C)CC(C)C	C741-1049	0.826	0.262	0.28	0.181	0.596	1
O=C1N(c2cc(C)c(cc2N=C1C)C)Cc1ccc(cc1)C(=O)NCCC[NH+]1CCCCC1C	F671-0346	0.826	0.578	0.531	0.181	0.42	1
o1c2c(nc1-c1ccccc1)cc(cc2)C(=O)N1CCC(CC1)C(C(=O)NCCC[NH+](CC)CC)C	L249-1112	0.826	0.719	0.67	0.18	0.043	1
o1c2cc(ccc2nc1-c1ccccc1)C(=O)N1CCC(CC1)C(C(=O)NCCC[NH+](CC)CC)C	L250-1112	0.826	0.719	0.67	0.18	0.043	1
Clc1cc(N2CCN(CC2)C(=O)C2CCC[NH+](C2)Cc2nc(oc2C)-c2ccc(cc2)CC)c(cc1)C	C522-4372	0.826	0.424	0.362	0.179	0.459	1
Clc1ccc(cc1)-c1noc(NCC2CC[NH+](CC2)Cc2cc(ccc2C)C)c1C(OC)=O	G790-0135	0.826	0.436	0.376	0.179	0.153	1
o1c2c(nc1-c1ccc(cc1)C)cc(cc2)C(=O)N1CCC(CC1)C(C(=O)NCC[NH+](CC)CC)C	L249-1583	0.826	0.314	0.349	0.179	0.065	1
Clc1ccc(cc1)CN1C(Cn2c(cc3occc23)C1=O)(C(=O)NCCC[NH+]1CC(CC(C1)C)C)C	C795-0924	0.826	0.128	0.286	0.178	0.06	1
s1nc(c2c1[nH+]cc(C(=O)N(CC)CC)c2N1CCC(CC1)C(=O)NCc1ccc(cc1)CC)C	Z341-0929	0.826	0.186	0.093	0.173	0.171	1
O(C(=O)c1n(C)c(C)c(CCC(=O)NCC2CC[NH+](CC2)Cc2ccc(cc2)C)c1C)CC	G793-0813	0.826	0.707	0.581	0.173	0.079	1
O(C)c1cc2c([nH+]c(cc2NC(CCC[NH+](CC)CC)C)\C=C\c2ccc([N+](=O)[O-])cc2)cc1	0585-0730	0.826	-0.126	0.246	0.17	0.421	1
O(C)c1cc2[nH+]c(cc(NC(CCC[NH+](CC)CC)C)c2cc1)\C=C\c1ccc([N+](=O)[O-])cc1	1314-0047	0.826	-0.126	0.253	0.17	0.27	1
Clc1ccc(cc1)C[NH+]1CCC(CC1)CNC(=O)CCc1c(C)c(n(C)c1C)C(OCC)=O	G793-0814	0.826	0.707	0.581	0.17	0.079	1
[NH+]=1c2c(-n3c(nnc3CC)C=1NCCC[NH+]1CC(N(CC1)c1cc(ccc1)C)C)cccc2	E869-0213	0.826	-0.104	0.022	0.164	0.456	1
s1nc(c2c1[nH+]cc(C(=O)N1CCC(CC1)C)c2N1CCC(CC1)C(=O)Nc1ccc(cc1)CC)C	Z341-0428	0.826	0.589	0.414	0.157	0.08	1
s1nc(c2c1[nH+]cc(C(=O)N1CCC(CC1)C)c2N1CCC(CC1)C(=O)Nc1cc(ccc1)CC)C	Z341-0477	0.826	0.589	0.414	0.157	0.08	1
S(Cc1nc(oc1C)-c1ccc(cc1)C(=O)NCCC[NH+]1CC(CC(C1)C)C)c1ccc(cc1)C	E776-0153	0.826	0.32	0.151	0.156	0.031	1
O=C1N(CCC[NH+]2CC(CC(C2)C)C)C(Cn2c1nc1c2cccc1)(C(=O)NC1CCC(CC1)C)C	E525-0257	0.826	0.287	0.219	0.156	0.027	1
O=C1NC2(N=C1c1ccc(cc1)C(C)(C)C)CC[NH+](CC2)CC(=O)Nc1cc(C)c(cc1)C	G610-0102	0.826	0.302	0.257	0.156	0.023	1
O(C(=O)c1c(C)c(n(CC(=O)NCC[NH+]2CCCCC2CC)c1C)-c1ccccc1)CC	C721-0265	0.826	0.247	0.12	0.156	0.022	1
o1c(nc(COc2ccc(cc2)C)c1C)-c1ccc(cc1)C(=O)NCCC[NH+]1CC(CC(C1)C)C	E773-0467	0.826	0.092	0.169	0.156	0.011	1
O(C(=O)c1c(C)c(n(CC(=O)NCCC[NH+]2CC(CCC2)C)c1C)-c1ccccc1)CC	C721-0276	0.826	0.248	0.26	0.155	0.022	1
O1c2cc(ccc2OC1)C[NH+]1CC[NH+](CC1)CC(=O)n1c2CCC(Cc2c2c1cccc2)C	Y020-7288	0.826	0.315	0.135	0.139	0.536	1
Clc1cc(ccc1)-c1oc(C)c(n1)C[NH+]1CCC(CC1)C(=O)NCCC[NH+]1CC(CC(C1)C)C	C522-1958	0.826	0.629	0.654	0.063	0.067	1
Clc1ccc(cc1)-c1n2N=C(N3CCC(CC3)C(=O)NCCC[NH+]3CC(CCC3)C)C=Cc2nn1	F707-2027	0.817	0.452	0.607	0.179	0.325	1
Clc1ccc(cc1)-c1n2N=C(N3CCC(CC3)C(=O)NCC[NH+]3CCCCC3CC)C=Cc2nn1	F707-2023	0.817	0.405	0.604	0.179	0.27	1
Clc1ccc(cc1)-c1n2N=C(N3CCC(CC3)C(=O)NCCC[NH+]3CCCCC3C)C=Cc2nn1	F707-2018	0.817	0.317	0.604	0.179	0.127	1
O=C(Nc1cc2c(nc(N3CCC(CC3)C)cc2C)cc1)CCC(=O)NCC[NH+]1CCc2c(C1)cccc2	C066-2226	0.803	0.629	0.691	0.206	0.058	1
O(C)c1cc2C3N(CCc2cc1OC)C(=O)c1c(cccc1)C3C(=O)NCCC[NH+]1CCCCCC1	C265-0345	0.799	0.383	0.345	0.261	0.44	1
O(C)c1cc(ccc1OC)CCN1CC(CC1=O)C(=O)NCCC[NH+]1CCC(CC1)Cc1ccccc1	K786-8806	0.799	0.797	0.736	0.261	0.431	1
O(C)c1c(cccc1OC)C(=O)N1CC2([NH2+]Cc3c([NH+]=C2NC2CCCC2)cccc3)CC1	S029-0833	0.799	0.339	0.167	0.212	0.631	1
O(C)c1cc(ccc1OC)C(=O)N1CC2([NH2+]Cc3c([NH+]=C2NC2CCCC2)cccc3)CC1	S029-0875	0.799	0.511	0.29	0.212	0.456	1
O(CC)c1ccccc1NC(=O)C(=O)NCC([NH+]1CCCCC1)c1cc2CCCN(c2cc1)C	F936-0716	0.799	0.282	0.409	0.206	0.819	1
O=C(Nc1cc(ccc1)C)C(=O)NCC([NH+]1CCCCC1)c1cc2CCCN(c2cc1)C	F936-0665	0.799	0.294	0.266	0.206	0.819	1
O=C(Nc1ccccc1C)C(=O)NCC([NH+]1CCCCC1)c1cc2CCCN(c2cc1)C	F936-0719	0.799	0.284	0.266	0.206	0.819	1
O=C(NC1CCCCCC1)C(=O)NCC([NH+]1CCCCC1)c1cc2CCCN(c2cc1)C	F936-0696	0.799	0.181	0.029	0.206	0.745	1
S(C)c1cc(NC(=O)C(=O)NCC([NH+]2CCCCC2)c2cc3CCCN(c3cc2)C)ccc1	F936-0674	0.799	0.394	0.251	0.206	0.624	1
O(C)c1ccccc1NC(=O)C(=O)NCC([NH+]1CCCCC1)c1cc2CCCN(c2cc1)C	F936-0715	0.799	0.343	0.279	0.206	0.58	1
O=C(NCc1ccccc1)C(=O)NCC([NH+]1CCCCC1)c1cc2CCCN(c2cc1)C	F936-0653	0.799	0.388	0.39	0.206	0.556	1
O=C(Nc1ccc(cc1)C)C(=O)NCC([NH+]1CCCCC1)c1cc2CCCN(c2cc1)C	F936-0660	0.799	0.175	0.258	0.206	0.556	1
[truncated: 1,256 more rows]

## Sheet: S6E
Table S6E: 675 molecules from Natural Products and their indexes for models 1,4,5 (AChE models) and models 2,8 (BACE-1 models)
[truncated: 676 more rows]

[truncated: 18 more sheets: S7aE, S7bE, S7E, S8E, S9E, S10aE, S10E, S11E, S12E, S13E, S14E, S15E, S16E, S17E, S18E, S19E, S20E, S21E]
